# Supplementary material for: Degradation of the transcription factors PIF4 and PIF5 under UV‐B promotes UVR8‐mediated inhibition of hypocotyl growth in Arabidopsis
Source: PubMed Central journal article supplement — Plant J. 2019 Nov 7;101(3):507–17. doi: 10.1111/tpj.14556 (PMC7027837; doi:10.1111/tpj.14556), 2019-11-07
Supplement: TPJ-101-507-s001.pdf [file TPJ-101-507-s001.pdf]

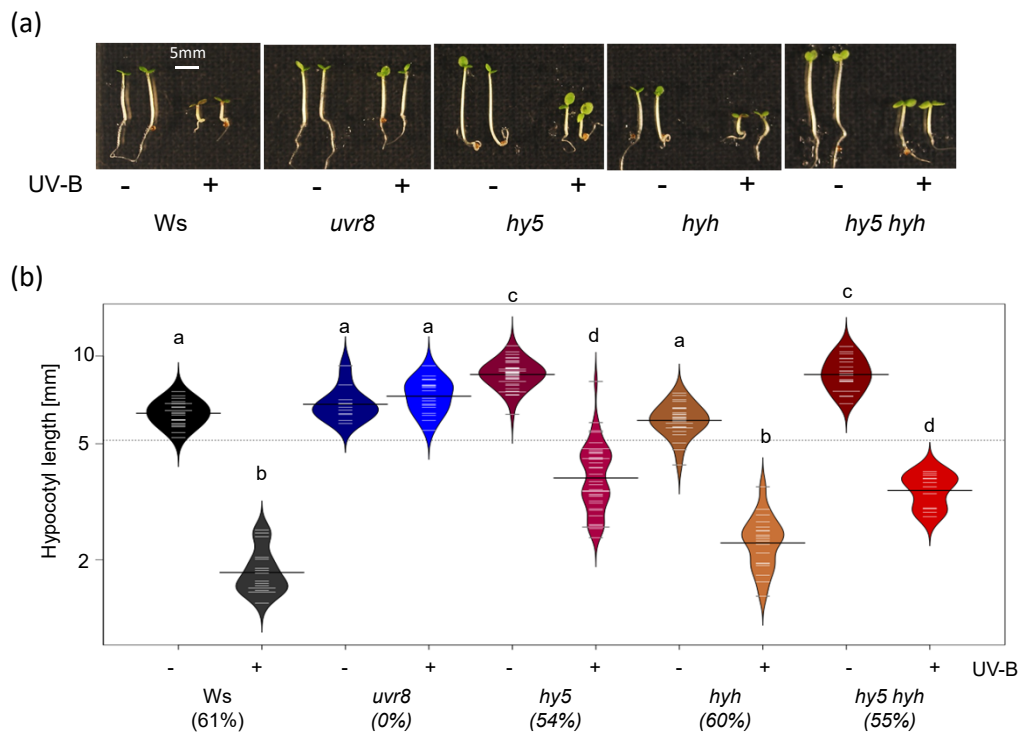

**Figure S1.** UVR8-mediated inhibition of hypocotyl growth is partially HY5 and HYH-independent.

(a) Representative image showing the hypocotyl growth phenotype of four-day-old wild-type (*Ws*), *uvr8-7*, *hy5-ks50*, *hyh-1*, and *hy5-ks50 hyh-1* seedlings grown under white light (- UV-B) or white light supplemented with UV-B (+ UV-B).

(b) Quantification of hypocotyl length. Beanplots represent data for  $n > 40$  seedlings. Shared letters indicate no statistically significant difference in the means ( $P > 0.05$ ). Percentages on the x-axis indicate the relative hypocotyl growth inhibition by UV-B.

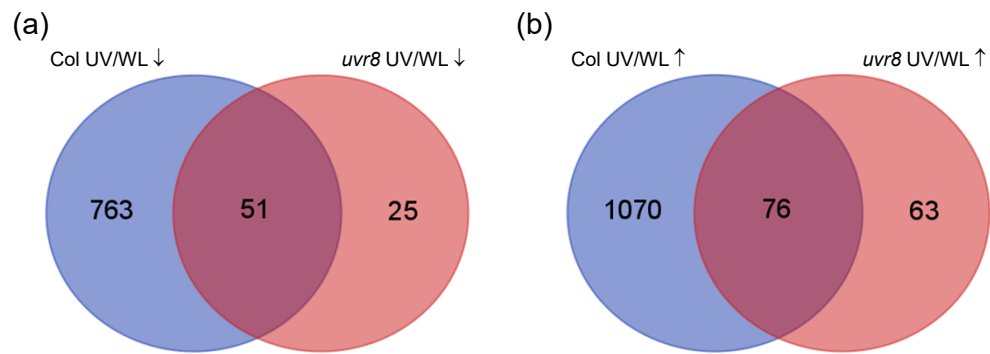

**Figure S2.** UVR8-dependent, UV-B-regulated genes.

(a) Venn diagram representing the intersection between UV-B-repressed genes in wild-type (Col UV/WL ↓) and *uvr8-6* mutant (*uvr8* UV/WL ↓) seedlings (FC > 2, adjusted pvalue < 0.05).

(b) Venn diagram representing the intersection between UV-B-induced genes in wild-type (Col UV/WL ↑) and *uvr8-6* mutant (*uvr8* UV/WL ↑) seedlings (FC > 2, adjusted pvalue < 0.05).

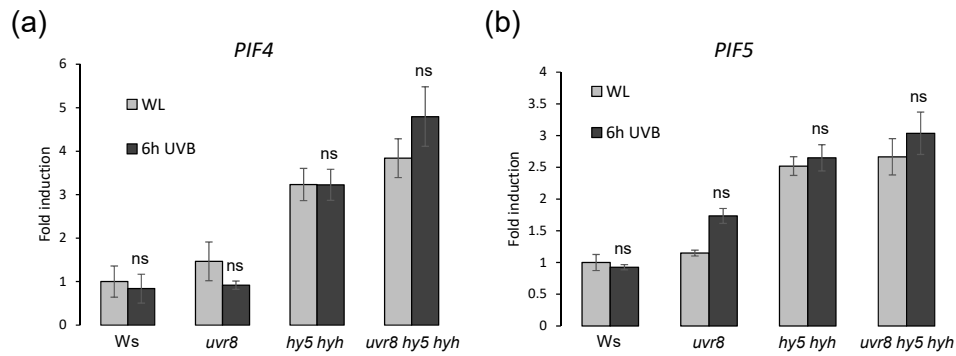

**Figure S3.** UV-B does not affect *PIF4* and *PIF5* expression.

(a, b) Quantitative real-time PCR analysis of (a) *PIF4* and (b) *PIF5* expression in four-day-old wild-type (*Ws*), *uvr8-7*, *hy5-ks50 hyh-1* and *uvr8-7 hy5-ks50 hyh-1* seedlings grown under white light and either exposed to a final 6 hours of UV-B (6h UVB) or not (WL). Error bars represent SE of three biological replicates. ns = no significant difference (UV-B compared to WL in each genotype).
