# Supplementary material for: Degradation of the transcription factors PIF4 and PIF5 under UV‐B promotes UVR8‐mediated inhibition of hypocotyl growth in Arabidopsis
Source: PubMed Central journal article supplement — Plant J. 2019 Nov 7;101(3):507–17. doi: 10.1111/tpj.14556 (PMC7027837; doi:10.1111/tpj.14556), 2019-11-07
Supplement: TPJ-101-507-s002.pdf [file TPJ-101-507-s002.pdf]

**Table S1: Genes regulated by narrowband UV-B in Col wild type and *uvr8-6*** (lists corresponding to Figure S2).

**Description**

[Col UV/WL Up and \*uvr8\* UV/WL Up: 76 genes](#)

[Col UV/WL Up: 1070 genes](#)

[uvr8 UV/WL Up: 63 genes](#)

[Col UV/WL Down and \*uvr8\* UV/WL Down: 51 genes](#)

[Col UV/WL Down: 763 genes](#)

[uvr8 UV/WL Down: 25 genes](#)

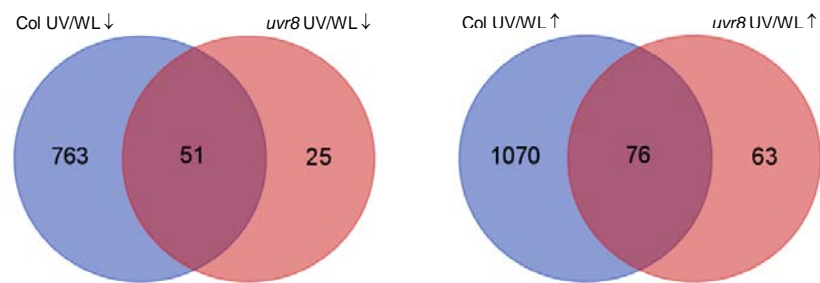

| Col UV/WL Up and <i>uvr8</i> UV/WL Up |                  |                                                                                           | Col UV/WL    |         |                 | <i>uvr8</i> UV/WL    |         |                 |
|---------------------------------------|------------------|-------------------------------------------------------------------------------------------|--------------|---------|-----------------|----------------------|---------|-----------------|
| AGI                                   | gene             | description                                                                               | Col UV/WL_FC | pvalue  | pvalue_with_FDR | <i>uvr8</i> UV/WL_FC | pvalue  | pvalue_with_FDR |
| AT2G23910                             | <i>AT2G23910</i> | NAD(P)-binding Rossmann-fold superfamily protein                                          | 94.5         | 6.3E-26 | 1.4E-21         | 2.1                  | 2.1E-05 | 2.8E-03         |
| AT4G14690                             | <i>ELIP2</i>     | Chlorophyll A-B binding family protein                                                    | 81.1         | 2.8E-21 | 2.6E-18         | 2.3                  | 2.5E-04 | 1.5E-02         |
| AT3G51240                             | <i>F3H</i>       | flavanone 3-hydroxylase                                                                   | 79.7         | 8.4E-23 | 1.6E-19         | 2.4                  | 3.5E-06 | 7.4E-04         |
| AT2G25510                             | <i>AT2G25510</i> | transmembrane protein                                                                     | 29.5         | 5.7E-14 | 7.1E-12         | 7.4                  | 3.1E-08 | 2.2E-05         |
| AT5G42760                             | <i>AT5G42760</i> | Leucine carboxyl methyltransferase                                                        | 12.0         | 1.3E-15 | 2.7E-13         | 2.1                  | 2.1E-04 | 1.4E-02         |
| AT2G29460                             | <i>GSTU4</i>     | glutathione S-transferase tau 4                                                           | 11.9         | 1.8E-13 | 2.1E-11         | 3.5                  | 8.0E-07 | 2.6E-04         |
| AT2G32550                             | <i>AT2G32550</i> | Cell differentiation, Rcd1-like protein                                                   | 11.0         | 1.1E-13 | 1.3E-11         | 2.3                  | 2.2E-04 | 1.4E-02         |
| AT5G40590                             | <i>AT5G40590</i> | Cysteine/Histidine-rich C1 domain family protein                                          | 10.8         | 1.4E-09 | 5.1E-08         | 6.6                  | 4.4E-08 | 2.8E-05         |
| AT4G28110                             | <i>MYB41</i>     | myb domain protein 41                                                                     | 10.7         | 8.7E-09 | 2.4E-07         | 8.6                  | 1.7E-07 | 7.9E-05         |
| AT5G58910                             | <i>LAC16</i>     | laccase 16                                                                                | 10.0         | 1.1E-10 | 5.3E-09         | 5.6                  | 1.0E-07 | 5.3E-05         |
| AT1G29720                             | <i>AT1G29720</i> | Leucine-rich repeat transmembrane protein kinase                                          | 9.1          | 2.2E-07 | 3.8E-06         | 4.3                  | 7.9E-04 | 3.2E-02         |
| AT3G09450                             | <i>AT3G09450</i> | fusaric acid resistance family protein                                                    | 9.0          | 1.9E-15 | 3.7E-13         | 2.1                  | 2.7E-04 | 1.6E-02         |
| AT3G28270                             | <i>AT3G28270</i> | transmembrane protein, putative (DUF677)                                                  | 9.0          | 1.8E-11 | 1.1E-09         | 2.2                  | 1.6E-03 | 4.7E-02         |
| AT4G16880                             | <i>AT4G16880</i> | Leucine-rich repeat (LRR) family protein                                                  | 8.5          | 1.4E-12 | 1.2E-10         | 2.3                  | 3.0E-04 | 1.7E-02         |
| AT1G07450                             | <i>AT1G07450</i> | NAD(P)-binding Rossmann-fold superfamily protein                                          | 8.1          | 2.0E-11 | 1.2E-09         | 4.6                  | 1.1E-06 | 3.2E-04         |
| AT5G06090                             | <i>GPAT7</i>     | glycerol-3-phosphate acyltransferase 7                                                    | 8.0          | 2.4E-07 | 4.1E-06         | 7.1                  | 1.0E-06 | 3.0E-04         |
| AT5G42530                             | <i>AT5G42530</i> | hypothetical protein                                                                      | 7.5          | 4.5E-06 | 5.2E-05         | 5.5                  | 5.1E-05 | 5.2E-03         |
| AT5G13900                             | <i>AT5G13900</i> | Bifunctional inhibitor/lipid-transfer protein/seed storage 2S albumin superfamily protein | 7.5          | 1.6E-10 | 7.7E-09         | 4.7                  | 8.1E-08 | 4.4E-05         |
| AT1G64000                             | <i>WRKY56</i>    | WRKY DNA-binding protein 56                                                               | 7.4          | 3.1E-06 | 3.7E-05         | 4.4                  | 1.1E-04 | 9.0E-03         |
| AT5G09520                             | <i>PELPK2</i>    | hydroxyproline-rich glycoprotein family protein                                           | 7.3          | 7.6E-10 | 2.9E-08         | 6.0                  | 5.8E-09 | 5.7E-06         |
| AT4G11521                             | <i>AT4G11521</i> | Receptor-like protein kinase-related family protein                                       | 7.2          | 4.5E-07 | 7.0E-06         | 3.9                  | 1.2E-03 | 4.2E-02         |
| AT5G08250                             | <i>AT5G08250</i> | Cytochrome P450 superfamily protein                                                       | 7.2          | 7.6E-09 | 2.1E-07         | 6.9                  | 1.2E-08 | 1.0E-05         |
| AT1G07500                             | <i>AT1G07500</i> | hypothetical protein                                                                      | 6.7          | 8.8E-09 | 2.4E-07         | 2.5                  | 8.6E-04 | 3.4E-02         |
| AT2G38240                             | <i>AT2G38240</i> | 2-oxoglutarate (2OG) and Fe(II)-dependent oxygenase superfamily protein                   | 6.6          | 1.4E-04 | 9.6E-04         | 7.9                  | 2.2E-04 | 1.4E-02         |
| AT3G50400                             | <i>AT3G50400</i> | GDSSL-like Lipase/Acylhydrolase superfamily protein                                       | 6.3          | 5.3E-09 | 1.6E-07         | 4.4                  | 4.4E-07 | 1.6E-04         |
| AT1G54540                             | <i>AT1G54540</i> | Late embryogenesis abundant (LEA) hydroxyproline-rich glycoprotein family                 | 6.3          | 2.7E-09 | 8.7E-08         | 2.1                  | 1.7E-03 | 5.0E-02         |
| AT1G07180                             | <i>NDA1</i>      | alternative NAD(P)H dehydrogenase 1                                                       | 6.2          | 3.5E-10 | 1.5E-08         | 2.1                  | 9.1E-04 | 3.5E-02         |
| AT5G58770                             | <i>cPT4</i>      | Undecaprenyl pyrophosphate synthetase family protein                                      | 6.0          | 1.5E-12 | 1.3E-10         | 2.1                  | 1.3E-04 | 9.9E-03         |
| AT2G34610                             | <i>AT2G34610</i> | cotton fiber protein                                                                      | 5.8          | 5.4E-09 | 1.6E-07         | 4.2                  | 1.9E-07 | 8.6E-05         |
| AT5G24080                             | <i>AT5G24080</i> | Protein kinase superfamily protein                                                        | 5.6          | 1.0E-07 | 1.9E-06         | 6.9                  | 1.0E-08 | 9.5E-06         |
| AT5G54165                             | <i>AT5G54165</i> | Avr9/Cf-9 rapidly elicited protein                                                        | 5.6          | 6.1E-06 | 6.7E-05         | 3.3                  | 2.3E-04 | 1.5E-02         |
| AT4G36610                             | <i>AT4G36610</i> | alpha/beta-Hydrolases superfamily protein                                                 | 5.4          | 1.6E-08 | 3.9E-07         | 3.8                  | 1.1E-06 | 3.2E-04         |
| AT5G12420                             | <i>AT5G12420</i> | O-acyltransferase (WSD1-like) family protein                                              | 5.2          | 3.7E-08 | 8.2E-07         | 4.4                  | 3.2E-07 | 1.2E-04         |
| AT3G50970                             | <i>LT130</i>     | dehydrin family protein                                                                   | 5.1          | 3.7E-15 | 6.6E-13         | 2.8                  | 2.7E-10 | 5.9E-07         |
| AT1G05450                             | <i>AT1G05450</i> | Bifunctional inhibitor/lipid-transfer protein/seed storage 2S albumin superfamily protein | 5.0          | 2.7E-04 | 1.6E-03         | 6.0                  | 4.7E-05 | 5.0E-03         |
| AT3G44550                             | <i>FAR5</i>      | fatty acid reductase 5                                                                    | 4.9          | 7.8E-07 | 1.1E-05         | 4.6                  | 2.4E-06 | 5.7E-04         |
| AT5G13580                             | <i>ABCG6</i>     | ABC-2 type transporter family protein                                                     | 4.9          | 3.0E-09 | 9.6E-08         | 5.6                  | 3.9E-10 | 7.0E-07         |
| AT4G03540                             | <i>AT4G03540</i> | Uncharacterized protein family (UPF0497)                                                  | 4.8          | 1.7E-08 | 4.2E-07         | 6.3                  | 6.9E-10 | 1.1E-06         |
| AT1G60590                             | <i>AT1G60590</i> | Pectin lyase-like superfamily protein                                                     | 4.8          | 2.8E-08 | 6.5E-07         | 2.2                  | 1.0E-03 | 3.7E-02         |
| AT5G09530                             | <i>PELPK1</i>    | hydroxyproline-rich glycoprotein family protein                                           | 4.7          | 1.1E-09 | 4.2E-08         | 4.6                  | 1.5E-09 | 2.0E-06         |
| AT3G11430                             | <i>GPAT5</i>     | glycerol-3-phosphate acyltransferase 5                                                    | 4.6          | 2.6E-07 | 4.3E-06         | 4.1                  | 6.8E-07 | 2.3E-04         |
| AT5G23190                             | <i>CYP86B1</i>   | cytochrome P450, family 86, subfamily B, polypeptide 1                                    | 4.6          | 9.4E-09 | 2.5E-07         | 4.5                  | 1.5E-08 | 1.1E-05         |
| AT3G55090                             | <i>ABCG16</i>    | ABC-2 type transporter family protein                                                     | 4.4          | 1.2E-06 | 1.6E-05         | 4.4                  | 8.5E-07 | 2.7E-04         |
| AT5G19410                             | <i>ABCG23</i>    | ABC-2 type transporter family protein                                                     | 4.3          | 1.1E-05 | 1.1E-04         | 3.5                  | 5.0E-05 | 5.2E-03         |
| AT4G10500                             | <i>AT4G10500</i> | 2-oxoglutarate (2OG) and Fe(II)-dependent oxygenase superfamily protein                   | 4.3          | 8.5E-08 | 1.7E-06         | 3.4                  | 5.7E-07 | 2.0E-04         |
| AT2G41690                             | <i>HSFB3</i>     | heat shock transcription factor B3                                                        | 4.2          | 8.6E-03 | 2.9E-02         | 5.2                  | 3.2E-04 | 1.8E-02         |
| AT1G68850                             | <i>AT1G68850</i> | Peroxidase superfamily protein                                                            | 4.2          | 4.9E-07 | 7.7E-06         | 3.7                  | 1.8E-06 | 4.7E-04         |
| AT1G74460                             | <i>AT1G74460</i> | GDSSL-like Lipase/Acylhydrolase superfamily protein                                       | 4.0          | 5.7E-07 | 8.7E-06         | 3.3                  | 6.7E-06 | 1.2E-03         |
| AT5G20860                             | <i>AT5G20860</i> | Plant invertase/pectin methylesterase inhibitor superfamily                               | 3.8          | 2.1E-04 | 1.3E-03         | 2.9                  | 1.3E-03 | 4.4E-02         |
| AT3G14620                             | <i>CYP72A8</i>   | cytochrome P450, family 72, subfamily A, polypeptide 8                                    | 3.7          | 1.3E-07 | 2.4E-06         | 5.0                  | 1.6E-09 | 2.1E-06         |
| AT1G56320                             | <i>AT1G56320</i> | hypothetical protein                                                                      | 3.7          | 1.1E-06 | 1.5E-05         | 3.7                  | 1.1E-06 | 3.2E-04         |
| AT1G05100                             | <i>MAPKKK18</i>  | mitogen-activated protein kinase kinase kinase 18                                         | 3.6          | 2.5E-05 | 2.2E-04         | 2.6                  | 8.4E-04 | 3.4E-02         |
| AT3G28155                             | <i>AT3G28155</i> | hypothetical protein                                                                      | 3.5          | 7.8E-03 | 2.7E-02         | 3.6                  | 1.5E-03 | 4.7E-02         |
| AT1G31580                             | <i>ECS1</i>      | ECS1                                                                                      | 3.4          | 9.9E-09 | 2.6E-07         | 3.8                  | 2.0E-09 | 2.4E-06         |
| AT1G48000                             | <i>MYB112</i>    | myb domain protein 112                                                                    | 3.3          | 1.4E-03 | 6.4E-03         | 4.4                  | 3.7E-04 | 2.0E-02         |
| AT2G22510                             | <i>AT2G22510</i> | hydroxyproline-rich glycoprotein family protein                                           | 3.3          | 1.4E-05 | 1.3E-04         | 3.7                  | 2.2E-06 | 5.3E-04         |
| AT1G03700                             | <i>AT1G03700</i> | Uncharacterized protein family (UPF0497)                                                  | 3.2          | 2.5E-05 | 2.2E-04         | 2.5                  | 6.3E-04 | 2.8E-02         |
| AT1G52690                             | <i>LEA7</i>      | Late embryogenesis abundant protein (LEA) family protein                                  | 3.2          | 1.6E-03 | 7.1E-03         | 4.5                  | 3.3E-05 | 3.8E-03         |
| AT2G40370                             | <i>LAC5</i>      | laccase 5                                                                                 | 3.1          | 1.1E-05 | 1.1E-04         | 3.0                  | 7.6E-06 | 1.3E-03         |

|           |                  |                                                                                            |     |         |         |     |         |         |
|-----------|------------------|--------------------------------------------------------------------------------------------|-----|---------|---------|-----|---------|---------|
| AT5G52310 | <i>LT178</i>     | low-temperature-responsive protein 78 (LT178) / desiccation-responsive protein 29A (RD29A) | 2.9 | 2.2E-07 | 3.8E-06 | 2.2 | 2.4E-05 | 3.1E-03 |
| AT1G04220 | <i>KCS2</i>      | 3-ketoacyl-CoA synthase 2                                                                  | 2.9 | 8.0E-08 | 1.6E-06 | 2.5 | 8.5E-07 | 2.7E-04 |
| AT1G68570 | <i>AT1G68570</i> | Major facilitator superfamily protein                                                      | 2.9 | 2.8E-07 | 4.7E-06 | 2.1 | 8.1E-05 | 7.2E-03 |
| AT1G49450 | <i>AT1G49450</i> | Transducin/WD40 repeat-like superfamily protein                                            | 2.8 | 3.7E-07 | 6.0E-06 | 2.2 | 3.2E-05 | 3.8E-03 |
| AT5G41040 | <i>RWP1</i>      | HXXXD-type acyl-transferase family protein                                                 | 2.7 | 1.5E-07 | 2.8E-06 | 2.1 | 1.7E-05 | 2.4E-03 |
| AT5G16770 | <i>MYB9</i>      | myb domain protein 9                                                                       | 2.5 | 6.8E-05 | 5.1E-04 | 3.2 | 1.5E-06 | 3.9E-04 |
| AT4G38080 | <i>AT4G38080</i> | hydroxyproline-rich glycoprotein family protein                                            | 2.5 | 1.4E-04 | 9.4E-04 | 2.5 | 1.6E-04 | 1.1E-02 |
| AT2G48140 | <i>EDA4</i>      | Bifunctional inhibitor/lipid-transfer protein/seed storage 2S albumin superfamily protein  | 2.5 | 4.4E-06 | 5.0E-05 | 2.0 | 1.3E-04 | 1.0E-02 |
| AT4G01870 | <i>AT4G01870</i> | tolB protein-like protein                                                                  | 2.4 | 4.3E-05 | 3.5E-04 | 5.5 | 1.7E-10 | 4.7E-07 |
| AT1G53270 | <i>ABCG10</i>    | ABC-2 type transporter family protein                                                      | 2.3 | 9.4E-05 | 6.7E-04 | 2.2 | 1.5E-04 | 1.1E-02 |
| AT1G18970 | <i>GLP4</i>      | germin-like protein 4                                                                      | 2.3 | 9.8E-03 | 3.2E-02 | 3.9 | 2.8E-05 | 3.4E-03 |
| AT4G15550 | <i>IAGLU</i>     | indole-3-acetate beta-D-glucosyltransferase                                                | 2.3 | 2.0E-08 | 4.7E-07 | 3.0 | 5.1E-11 | 1.8E-07 |
| AT5G28510 | <i>BGLU24</i>    | beta glucosidase 24                                                                        | 2.3 | 9.2E-03 | 3.0E-02 | 5.9 | 1.1E-08 | 9.5E-06 |
| AT1G78340 | <i>GSTU22</i>    | glutathione S-transferase TAU 22                                                           | 2.2 | 1.2E-06 | 1.6E-05 | 3.3 | 7.2E-11 | 2.2E-07 |
| AT5G61820 | <i>AT5G61820</i> | stress up-regulated Nod 19 protein                                                         | 2.1 | 2.4E-08 | 5.7E-07 | 2.3 | 4.1E-09 | 4.4E-06 |
| AT3G09270 | <i>GSTU8</i>     | glutathione S-transferase TAU 8                                                            | 2.1 | 2.4E-06 | 3.0E-05 | 2.1 | 2.8E-06 | 6.2E-04 |
| AT5G07475 | <i>AT5G07475</i> | Cupredoxin superfamily protein                                                             | 2.0 | 1.5E-03 | 6.9E-03 | 2.3 | 2.3E-04 | 1.5E-02 |

| Col UV/WL up |                  |                                                                  | Col UV/WL    |         |                 | uvr8 UV/WL    |         |                 |
|--------------|------------------|------------------------------------------------------------------|--------------|---------|-----------------|---------------|---------|-----------------|
| AGI          | gene             | description                                                      | Col_UV/WL_FC | pvalue  | pvalue_with_FDR | uvr8_UV/WL_FC | pvalue  | pvalue_with_FDR |
| AT2G22590    | <i>AT2G22590</i> | UDP-Glycosyltransferase superfamily protein                      | 1047.8       | 2.4E-24 | 1.3E-20         | 2.5           | 1.4E-01 | 4.6E-01         |
| AT3G22840    | <i>ELIP1</i>     | Chlorophyll A-B binding family protein                           | 470.0        | 3.6E-16 | 9.4E-14         | 2.2           | 1.2E-01 | 4.5E-01         |
| AT4G34550    | <i>AT4G34550</i> | F-box protein                                                    | 340.6        | 1.2E-16 | 3.5E-14         | 4.5           | 6.0E-02 | 3.2E-01         |
| AT4G31870    | <i>GPX7</i>      | glutathione peroxidase 7                                         | 221.3        | 1.6E-21 | 1.9E-18         | 3.7           | 9.1E-03 | 1.2E-01         |
| AT4G15480    | <i>UGT84A1</i>   | UDP-Glycosyltransferase superfamily protein                      | 164.6        | 2.1E-21 | 2.2E-18         | 1.2           | 6.4E-01 | 8.6E-01         |
| AT5G17030    | <i>UGT78D3</i>   | UDP-glucosyl transferase 78D3                                    | 155.4        | 3.1E-06 | 3.7E-05         | -1.0          | 1.0E+00 | 1.0E+00         |
| AT5G62210    | <i>AT5G62210</i> | Embryo-specific protein 3, (ATS3)                                | 148.9        | 2.2E-22 | 3.4E-19         | 1.3           | 4.2E-01 | 7.4E-01         |
| AT1G64340    | <i>AT1G64340</i> | Serine/Threonine-kinase                                          | 130.0        | 7.0E-06 | 7.4E-05         | 1.0           | 1.0E+00 | 1.0E+00         |
| AT5G13930    | <i>TT4</i>       | Chalcone and stilbene synthase family protein                    | 102.0        | 2.2E-13 | 2.4E-11         | 2.5           | 6.3E-03 | 1.0E-01         |
| AT5G08640    | <i>FLS1</i>      | flavonol synthase 1                                              | 92.8         | 7.6E-15 | 1.2E-12         | 2.4           | 4.9E-03 | 8.9E-02         |
| AT1G75040    | <i>PR5</i>       | pathogenesis-related protein 5                                   | 69.3         | 2.8E-10 | 1.2E-08         | 4.6           | 1.0E-01 | 4.1E-01         |
| AT1G76290    | <i>AT1G76290</i> | AMP-dependent synthetase and ligase family protein               | 63.9         | 2.8E-04 | 1.7E-03         | -1.0          | 1.0E+00 | 1.0E+00         |
| AT5G17040    | <i>AT5G17040</i> | UDP-Glycosyltransferase superfamily protein                      | 61.6         | 9.6E-17 | 2.9E-14         | 1.6           | 1.9E-01 | 5.3E-01         |
| AT2G42540    | <i>COR15A</i>    | cold-regulated 15a                                               | 61.4         | 6.6E-06 | 7.1E-05         | 8.7           | 1.2E-02 | 1.4E-01         |
| AT1G69560    | <i>MYB105</i>    | myb domain protein 105                                           | 55.4         | 1.0E-04 | 7.2E-04         | 2.5           | 8.9E-02 | 3.8E-01         |
| AT3G62610    | <i>MYB11</i>     | myb domain protein 11                                            | 53.3         | 4.8E-10 | 2.0E-08         | -1.4          | 6.8E-01 | 8.8E-01         |
| AT1G80340    | <i>GA3OX2</i>    | gibberellin 3-oxidase 2                                          | 50.4         | 2.7E-12 | 2.1E-10         | 1.2           | 7.6E-01 | 9.2E-01         |
| AT1G66540    | <i>AT1G66540</i> | Cytochrome P450 superfamily protein                              | 41.8         | 5.5E-16 | 1.3E-13         | 1.8           | 6.5E-02 | 3.3E-01         |
| AT3G10185    | <i>AT3G10185</i> | Gibberellin-regulated family protein                             | 41.8         | 8.7E-03 | 2.9E-02         | 6.0           | 2.8E-01 | 6.3E-01         |
| AT2G16367    | <i>AT2G16367</i> |                                                                  | 41.7         | 3.3E-05 | 2.8E-04         | 26.1          | 1.9E-02 | 1.8E-01         |
| AT4G12320    | <i>CYP706A6</i>  | cytochrome P450, family 706, subfamily A, polypeptide 6          | 37.5         | 7.1E-13 | 6.6E-11         | 4.6           | 2.1E-03 | 5.7E-02         |
| AT5G55570    | <i>AT5G55570</i> | transmembrane protein                                            | 36.3         | 1.5E-10 | 7.0E-09         | 1.2           | 7.3E-01 | 9.1E-01         |
| AT3G07620    | <i>AT3G07620</i> | glycosyltransferase                                              | 34.4         | 1.6E-08 | 4.0E-07         | -2.5          | 3.4E-01 | 6.8E-01         |
| AT5G10760    | <i>AT5G10760</i> | Eukaryotic aspartyl protease family protein                      | 33.9         | 5.2E-03 | 1.9E-02         | 1.5           | 6.4E-01 | 8.7E-01         |
| AT4G23496    | <i>SP1L5</i>     | SPIRAL1-like5                                                    | 33.0         | 9.3E-11 | 4.7E-09         | 1.6           | 2.3E-01 | 5.8E-01         |
| AT5G48880    | <i>KAT5</i>      | peroxisomal 3-keto-acyl-CoA thiolase 2                           | 31.4         | 4.4E-20 | 3.0E-17         | 1.5           | 2.0E-02 | 1.9E-01         |
| AT4G22090    | <i>AT4G22090</i> | Pectin lyase-like superfamily protein                            | 31.1         | 4.4E-05 | 3.5E-04         | 5.1           | 8.5E-03 | 1.2E-01         |
| AT3G44450    | <i>AT3G44450</i> | hypothetical protein                                             | 30.7         | 2.7E-21 | 2.6E-18         | 1.5           | 3.0E-02 | 2.3E-01         |
| AT1G52770    | <i>AT1G52770</i> | Phototropic-responsive NPH3 family protein                       | 29.7         | 1.3E-05 | 1.2E-04         | 26.4          | 4.5E-03 | 8.5E-02         |
| AT3G30460    | <i>AT3G30460</i> | RING/U-box superfamily protein                                   | 29.6         | 3.4E-09 | 1.1E-07         | -3.1          | 1.2E-01 | 4.4E-01         |
| AT2G36750    | <i>UGT73C1</i>   | UDP-glucosyl transferase 73C1                                    | 27.7         | 2.7E-11 | 1.6E-09         | 2.3           | 4.6E-02 | 2.8E-01         |
| AT5G07990    | <i>TT7</i>       | Cytochrome P450 superfamily protein                              | 26.6         | 5.4E-23 | 1.2E-19         | 1.3           | 1.1E-01 | 4.2E-01         |
| AT5G09930    | <i>ABCF2</i>     | ABC transporter family protein                                   | 25.9         | 1.5E-14 | 2.2E-12         | 2.7           | 1.2E-02 | 1.4E-01         |
| AT2G24000    | <i>scpl22</i>    | serine carboxypeptidase-like 22                                  | 25.6         | 4.5E-03 | 1.7E-02         | 3.8           | 1.5E-01 | 4.8E-01         |
| AT1G10370    | <i>ERD9</i>      | Glutathione S-transferase family protein                         | 24.9         | 8.7E-25 | 6.3E-21         | 1.4           | 3.4E-03 | 7.3E-02         |
| AT4G18422    | <i>AT4G18422</i> | transmembrane protein                                            | 23.1         | 2.9E-05 | 2.5E-04         | 1.0           | 1.0E+00 | 1.0E+00         |
| AT3G63320    | <i>AT3G63320</i> | Protein phosphatase 2C family protein                            | 23.0         | 7.0E-03 | 2.4E-02         | -3.2          | 2.3E-01 | 5.8E-01         |
| AT2G15020    | <i>AT2G15020</i> | hypothetical protein                                             | 22.4         | 9.7E-12 | 6.3E-10         | 2.5           | 6.1E-03 | 1.0E-01         |
| AT5G17220    | <i>GSTF12</i>    | glutathione S-transferase phi 12                                 | 21.7         | 1.2E-10 | 5.7E-09         | 2.0           | 8.4E-02 | 3.7E-01         |
| AT1G27940    | <i>ABCB13</i>    | P-glycoprotein 13                                                | 21.4         | 3.1E-10 | 1.3E-08         | -1.6          | 5.0E-01 | 7.9E-01         |
| AT2G27420    | <i>AT2G27420</i> | Cysteine proteinases superfamily protein                         | 21.3         | 2.4E-15 | 4.6E-13         | 1.5           | 1.1E-01 | 4.3E-01         |
| AT1G12570    | <i>AT1G12570</i> | Glucose-methanol-choline (GMC) oxidoreductase family protein     | 21.2         | 1.7E-09 | 5.8E-08         | 1.4           | 6.1E-01 | 8.5E-01         |
| AT5G05270    | <i>CHIL</i>      | Chalcone-flavanone isomerase family protein                      | 20.9         | 1.2E-21 | 1.5E-18         | 1.7           | 2.1E-04 | 1.4E-02         |
| AT5G66740    | <i>AT5G66740</i> | spindle assembly abnormal protein (DUF620)                       | 20.2         | 5.1E-09 | 1.5E-07         | 1.2           | 6.5E-01 | 8.7E-01         |
| AT2G47460    | <i>MYB12</i>     | myb domain protein 12                                            | 19.7         | 4.9E-22 | 6.6E-19         | 1.5           | 5.3E-03 | 9.4E-02         |
| AT1G07330    | <i>AT1G07330</i> | dentin sialophosphoprotein                                       | 19.7         | 2.8E-08 | 6.5E-07         | -1.2          | 6.2E-01 | 8.5E-01         |
| AT1G65060    | <i>4CL3</i>      | 4-coumarate:CoA ligase 3                                         | 19.6         | 1.8E-14 | 2.5E-12         | 1.6           | 3.6E-02 | 2.5E-01         |
| AT4G10250    | <i>ATHSP22.0</i> | HSP20-like chaperones superfamily protein                        | 16.7         | 4.5E-05 | 3.6E-04         | -2.0          | 7.8E-02 | 3.5E-01         |
| AT3G55120    | <i>TT5</i>       | Chalcone-flavanone isomerase family protein                      | 15.2         | 7.2E-25 | 6.3E-21         | 1.2           | 5.8E-02 | 3.1E-01         |
| AT5G15960    | <i>KIN1</i>      | stress-responsive protein (KIN1) / stress-induced protein (KIN1) | 14.8         | 5.6E-09 | 1.6E-07         | 1.6           | 1.8E-01 | 5.2E-01         |
| AT4G04840    | <i>MSRB6</i>     | methionine sulfoxide reductase B6                                | 14.3         | 2.0E-14 | 2.9E-12         | 1.1           | 5.6E-01 | 8.2E-01         |
| AT5G62240    | <i>AT5G62240</i> | Cell cycle regulated microtubule associated protein              | 14.2         | 1.8E-11 | 1.1E-09         | 2.2           | 8.5E-03 | 1.2E-01         |
| AT5G51030    | <i>AT5G51030</i> | NAD(P)-binding Rossmann-fold superfamily protein                 | 14.0         | 1.4E-10 | 6.7E-09         | 1.9           | 3.4E-02 | 2.4E-01         |
| AT2G03520    | <i>UPS4</i>      | ureide permease 4                                                | 13.3         | 2.5E-10 | 1.1E-08         | 3.4           | 2.9E-03 | 6.8E-02         |
| AT3G52740    | <i>AT3G52740</i> | hypothetical protein                                             | 13.2         | 1.3E-20 | 9.9E-18         | 1.6           | 6.3E-04 | 2.8E-02         |
| AT2G20825    | <i>ULT2</i>      | Developmental regulator, ULTRAPETALA                             | 12.7         | 2.8E-06 | 3.4E-05         | 1.6           | 2.2E-01 | 5.6E-01         |
| AT3G21560    | <i>UGT84A2</i>   | UDP-Glycosyltransferase superfamily protein                      | 12.7         | 1.3E-23 | 3.6E-20         | 1.2           | 8.4E-02 | 3.7E-01         |

|           |           |                                                                                              |      |         |         |      |         |         |
|-----------|-----------|----------------------------------------------------------------------------------------------|------|---------|---------|------|---------|---------|
| AT1G65490 | AT1G65490 | transmembrane protein                                                                        | 12.6 | 1.4E-14 | 2.1E-12 | 2.0  | 3.2E-03 | 7.2E-02 |
| AT5G36910 | THI2.2    | thionin 2.2                                                                                  | 12.1 | 9.4E-14 | 1.1E-11 | 1.6  | 1.4E-02 | 1.5E-01 |
| AT1G06000 | AT1G06000 | UDP-Glycosyltransferase superfamily protein                                                  | 11.3 | 8.3E-20 | 5.4E-17 | 1.4  | 6.4E-03 | 1.0E-01 |
| AT3G21080 | AT3G21080 | ABC transporter-like protein                                                                 | 11.0 | 8.1E-04 | 4.1E-03 | -1.2 | 7.8E-01 | 9.3E-01 |
| AT3G21150 | BBX32     | B-box 32                                                                                     | 11.0 | 4.0E-12 | 3.0E-10 | 2.0  | 7.6E-03 | 1.1E-01 |
| AT5G50800 | SWEET13   | Nodulin MtN3 family protein                                                                  | 10.8 | 8.9E-06 | 9.1E-05 | -3.5 | 5.7E-02 | 3.1E-01 |
| AT1G13610 | AT1G13610 | alpha/beta-Hydrolases superfamily protein                                                    | 10.7 | 3.4E-11 | 1.9E-09 | 2.0  | 2.4E-02 | 2.0E-01 |
| AT4G27560 | AT4G27560 | UDP-Glycosyltransferase superfamily protein                                                  | 10.6 | 4.5E-17 | 1.5E-14 | 1.5  | 1.4E-02 | 1.5E-01 |
| AT1G06180 | MYB13     | myb domain protein 13                                                                        | 10.5 | 1.5E-14 | 2.2E-12 | 1.3  | 1.9E-01 | 5.4E-01 |
| AT1G65870 | AT1G65870 | Disease resistance-responsive (dirigent-like protein) family protein                         | 10.4 | 4.4E-13 | 4.4E-11 | 1.8  | 1.5E-02 | 1.6E-01 |
| AT3G62960 | AT3G62960 | Thioredoxin superfamily protein                                                              | 10.2 | 1.3E-05 | 1.3E-04 | -1.7 | 4.0E-01 | 7.2E-01 |
| AT5G24150 | SQP1      | FAD/NAD(P)-binding oxidoreductase family protein                                             | 10.2 | 8.6E-13 | 7.9E-11 | 1.8  | 7.6E-03 | 1.1E-01 |
| AT1G09500 | AT1G09500 | NAD(P)-binding Rossmann-fold superfamily protein                                             | 10.1 | 4.9E-05 | 3.8E-04 | 2.1  | 2.1E-01 | 5.6E-01 |
| AT4G05110 | ENT6      | equilibrative nucleoside transporter 6                                                       | 10.0 | 1.7E-11 | 1.1E-09 | 1.6  | 9.3E-02 | 3.9E-01 |
| AT2G29170 | AT2G29170 | NAD(P)-binding Rossmann-fold superfamily protein                                             | 9.9  | 3.4E-07 | 5.5E-06 | 1.5  | 3.9E-01 | 7.2E-01 |
| AT1G23010 | LPR1      | Cupredoxin superfamily protein                                                               | 9.8  | 2.7E-14 | 3.7E-12 | 1.7  | 1.3E-02 | 1.5E-01 |
| AT1G52990 | AT1G52990 | thioredoxin family protein                                                                   | 9.8  | 1.1E-06 | 1.5E-05 | -1.4 | 5.1E-01 | 7.9E-01 |
| AT1G01520 | ASG4      | Homeodomain-like superfamily protein                                                         | 9.5  | 6.8E-15 | 1.1E-12 | 1.6  | 9.2E-03 | 1.2E-01 |
| AT1G76530 | AT1G76530 | Auxin efflux carrier family protein                                                          | 9.4  | 5.4E-05 | 4.2E-04 | 2.5  | 5.8E-02 | 3.1E-01 |
| AT5G04000 | AT5G04000 | hypothetical protein                                                                         | 9.4  | 1.2E-14 | 1.8E-12 | 1.6  | 1.9E-02 | 1.8E-01 |
| AT2G25530 | AT2G25530 | AFG1-like ATPase family protein                                                              | 9.4  | 1.4E-21 | 1.7E-18 | 1.5  | 4.1E-04 | 2.1E-02 |
| AT3G23810 | SAHH2     | S-adenosyl-L-homocysteine (SAH) hydrolase 2                                                  | 9.4  | 4.5E-15 | 7.7E-13 | 1.7  | 1.9E-03 | 5.4E-02 |
| AT5G16530 | PIN5      | Auxin efflux carrier family protein                                                          | 9.2  | 3.8E-06 | 4.4E-05 | -2.3 | 3.0E-01 | 6.4E-01 |
| AT3G10150 | PAP16     | purple acid phosphatase 16                                                                   | 9.1  | 2.7E-06 | 3.3E-05 | 2.2  | 1.0E-01 | 4.0E-01 |
| AT3G57020 | AT3G57020 | Calcium-dependent phosphotriesterase superfamily protein                                     | 9.1  | 2.0E-16 | 5.7E-14 | 1.6  | 1.0E-03 | 3.8E-02 |
| AT5G23730 | RUP2      | Transducin/WD40 repeat-like superfamily protein                                              | 9.0  | 1.3E-19 | 8.1E-17 | 1.4  | 6.1E-03 | 1.0E-01 |
| AT5G09990 | PROPEP5   | elicitor peptide 5 precursor                                                                 | 9.0  | 5.3E-09 | 1.5E-07 | 1.7  | 1.3E-01 | 4.5E-01 |
| AT1G06540 | AT1G06540 | hypothetical protein                                                                         | 9.0  | 1.8E-09 | 6.2E-08 | 1.0  | 9.0E-01 | 9.7E-01 |
| AT4G00970 | CRK41     | cysteine-rich RLK (RECEPTOR-like protein kinase) 41                                          | 8.9  | 8.2E-09 | 2.2E-07 | 1.6  | 1.5E-01 | 4.8E-01 |
| AT1G02820 | LEA3      | Late embryogenesis abundant 3 (LEA3) family protein                                          | 8.7  | 3.5E-12 | 2.6E-10 | -1.2 | 4.2E-01 | 7.3E-01 |
| AT3G01550 | PPT2      | phosphoenolpyruvate (pep)/phosphate translocator 2                                           | 8.6  | 5.3E-12 | 3.8E-10 | 1.7  | 1.3E-02 | 1.5E-01 |
| AT4G18650 | AT4G18650 | transcription factor-like protein                                                            | 8.6  | 2.8E-10 | 1.2E-08 | 1.9  | 2.8E-02 | 2.2E-01 |
| AT1G57770 | AT1G57770 | FAD/NAD(P)-binding oxidoreductase family protein                                             | 8.5  | 1.3E-18 | 6.1E-16 | 1.9  | 7.5E-06 | 1.3E-03 |
| AT5G49330 | MYB111    | myb domain protein 111                                                                       | 8.4  | 5.3E-08 | 1.1E-06 | 1.3  | 4.2E-01 | 7.4E-01 |
| AT4G26530 | FBA5      | Aldolase superfamily protein                                                                 | 8.4  | 3.1E-06 | 3.7E-05 | 1.4  | 3.4E-01 | 6.8E-01 |
| AT4G37760 | SQE3      | squalene epoxidase 3                                                                         | 7.8  | 3.5E-17 | 1.2E-14 | 1.6  | 5.6E-04 | 2.6E-02 |
| AT5G60900 | RLK1      | receptor-like protein kinase 1                                                               | 7.6  | 6.0E-05 | 4.6E-04 | 3.5  | 7.5E-03 | 1.1E-01 |
| AT1G66725 | MIR163    |                                                                                              | 7.6  | 2.0E-15 | 3.8E-13 | 1.4  | 1.7E-02 | 1.7E-01 |
| AT1G56650 | PAP1      | production of anthocyanin pigment 1                                                          | 7.4  | 5.5E-03 | 2.0E-02 | 1.7  | 3.9E-01 | 7.2E-01 |
| AT5G17050 | UGT78D2   | UDP-glucosyl transferase 78D2                                                                | 7.3  | 5.1E-23 | 1.2E-19 | 1.4  | 1.7E-04 | 1.2E-02 |
| AT1G55960 | AT1G55960 | Polyketide cyclase/dehydrase and lipid transport superfamily protein                         | 7.3  | 6.1E-15 | 1.0E-12 | 1.7  | 4.6E-04 | 2.3E-02 |
| AT2G18490 | AT2G18490 | C2H2-like zinc finger protein                                                                | 7.2  | 9.6E-04 | 4.7E-03 | 1.3  | 6.6E-01 | 8.8E-01 |
| AT1G55320 | AAE18     | acyl-activating enzyme 18                                                                    | 7.2  | 2.6E-17 | 8.9E-15 | 1.1  | 2.9E-01 | 6.3E-01 |
| AT2G36295 | AT2G36295 | hypothetical protein                                                                         | 7.1  | 1.9E-05 | 1.7E-04 | 3.8  | 2.7E-03 | 6.5E-02 |
| AT3G51238 | AT3G51238 | Natural antisense transcript overlaps with AT3G51240                                         | 7.1  | 1.8E-06 | 2.3E-05 | 1.5  | 3.7E-01 | 7.0E-01 |
| AT1G28610 | AT1G28610 | GDSL-like Lipase/Acylhydrolase superfamily protein                                           | 7.1  | 3.5E-13 | 3.6E-11 | 1.6  | 1.2E-02 | 1.4E-01 |
| AT1G65560 | AT1G65560 | Zinc-binding dehydrogenase family protein                                                    | 7.0  | 1.7E-18 | 7.3E-16 | -1.0 | 8.0E-01 | 9.4E-01 |
| AT3G56290 | AT3G56290 | potassium transporter                                                                        | 6.8  | 1.0E-18 | 5.0E-16 | 1.7  | 2.0E-05 | 2.8E-03 |
| AT4G13900 | RLP49     | pseudogene of receptor like protein 47                                                       | 6.8  | 6.4E-09 | 1.8E-07 | 1.1  | 6.9E-01 | 8.9E-01 |
| AT3G46260 | AT3G46260 | kinase-like protein                                                                          | 6.7  | 2.0E-03 | 8.6E-03 | 3.8  | 1.4E-01 | 4.7E-01 |
| AT1G14250 | AT1G14250 | GDA1/CD39 nucleoside phosphatase family protein                                              | 6.6  | 1.1E-03 | 5.1E-03 | 3.5  | 3.0E-02 | 2.3E-01 |
| AT1G03940 | AT1G03940 | HXXXD-type acyl-transferase family protein                                                   | 6.6  | 1.1E-03 | 5.3E-03 | 2.5  | 1.9E-01 | 5.3E-01 |
| AT2G36145 | AT2G36145 | hypothetical protein                                                                         | 6.6  | 2.6E-16 | 7.0E-14 | 1.8  | 7.0E-05 | 6.5E-03 |
| AT1G78570 | RHM1      | rhamnose biosynthesis 1                                                                      | 6.5  | 1.4E-22 | 2.4E-19 | 1.4  | 1.4E-04 | 1.1E-02 |
| AT5G20230 | BCB       | blue-copper-binding protein                                                                  | 6.4  | 4.8E-10 | 1.9E-08 | -1.0 | 9.4E-01 | 9.9E-01 |
| AT5G17780 | AT5G17780 | alpha/beta-Hydrolases superfamily protein                                                    | 6.4  | 2.4E-14 | 3.3E-12 | 1.5  | 6.3E-03 | 1.0E-01 |
| AT1G09240 | NAS3      | nicotianamine synthase 3                                                                     | 6.4  | 2.8E-05 | 2.4E-04 | 2.1  | 1.1E-01 | 4.1E-01 |
| AT1G26790 | AT1G26790 | Dof-type zinc finger DNA-binding family protein                                              | 6.4  | 2.2E-11 | 1.3E-09 | 1.6  | 6.0E-02 | 3.2E-01 |
| AT5G22020 | AT5G22020 | Calcium-dependent phosphotriesterase superfamily protein                                     | 6.3  | 4.6E-22 | 6.6E-19 | 1.1  | 1.4E-01 | 4.8E-01 |
| AT1G04880 | AT1G04880 | HMG (high mobility group) box protein with ARID/BRIGHT DNA-binding domain-containing protein | 6.3  | 5.6E-10 | 2.2E-08 | 1.4  | 1.7E-01 | 5.1E-01 |
| AT3G61400 | AT3G61400 | 2-oxoglutarate (2OG) and Fe(II)-dependent oxygenase superfamily protein                      | 6.3  | 5.3E-03 | 1.9E-02 | 3.5  | 3.2E-01 | 6.7E-01 |
| AT1G47370 | AT1G47370 | Toll-Interleukin-Resistance (TIR) domain family protein                                      | 6.3  | 4.7E-03 | 1.8E-02 | 1.1  | 8.6E-01 | 9.6E-01 |
| AT4G13410 | ATCSLA15  | Nucleotide-diphospho-sugar transferases superfamily protein                                  | 6.3  | 1.5E-09 | 5.2E-08 | 1.7  | 1.3E-02 | 1.5E-01 |
| AT1G64940 | CYP89A6   | cytochrome P450, family 87, subfamily A, polypeptide 6                                       | 6.3  | 6.8E-12 | 4.6E-10 | 1.4  | 9.4E-02 | 3.9E-01 |
| AT2G40460 | AT2G40460 | Major facilitator superfamily protein                                                        | 6.3  | 1.3E-14 | 1.9E-12 | -1.1 | 4.5E-01 | 7.6E-01 |
| AT2G47370 | AT2G47370 | Calcium-dependent phosphotriesterase superfamily protein                                     | 6.2  | 2.7E-15 | 5.0E-13 | 1.4  | 2.3E-02 | 2.0E-01 |
| AT5G37550 | AT5G37550 | hypothetical protein                                                                         | 6.1  | 2.9E-14 | 3.9E-12 | 1.2  | 1.7E-01 | 5.1E-01 |
| AT2G36790 | UGT73C6   | UDP-glucosyl transferase 73C6                                                                | 6.1  | 2.9E-10 | 1.3E-08 | 1.7  | 2.5E-02 | 2.1E-01 |
| AT5G56090 | COX15     | cytochrome c oxidase 15                                                                      | 6.1  | 3.1E-21 | 2.8E-18 | 1.1  | 4.6E-01 | 7.6E-01 |

|           |           |                                                                                                    |     |         |         |      |         |         |
|-----------|-----------|----------------------------------------------------------------------------------------------------|-----|---------|---------|------|---------|---------|
| AT3G51750 | AT3G51750 | hypothetical protein                                                                               | 6.1 | 6.2E-12 | 4.3E-10 | 1.2  | 3.5E-01 | 6.9E-01 |
| AT5G02270 | ABC120    | non-intrinsic ABC protein 9                                                                        | 6.1 | 7.5E-21 | 6.3E-18 | 1.3  | 1.6E-03 | 4.8E-02 |
| AT1G54570 | PES1      | Esterase/lipase/thioesterase family protein                                                        | 6.0 | 6.8E-19 | 3.7E-16 | 1.7  | 3.4E-06 | 7.2E-04 |
| AT1G03495 | AT1G03495 | HXXXD-type acyl-transferase family protein                                                         | 6.0 | 1.3E-02 | 4.0E-02 | 1.9  | 4.7E-01 | 7.7E-01 |
| AT1G06690 | AT1G06690 | NAD(P)-linked oxidoreductase superfamily protein                                                   | 6.0 | 3.5E-21 | 3.0E-18 | 1.3  | 1.3E-03 | 4.3E-02 |
| AT4G32770 | VTE1      | tocopherol cyclase, chloroplast / vitamin E deficient 1 (VTE1) / sucrose export defective 1 (SXD1) | 5.9 | 9.4E-18 | 3.6E-15 | 1.5  | 6.4E-04 | 2.8E-02 |
| AT5G24420 | PGL5      | 6-phosphogluconolactonase 5                                                                        | 5.9 | 1.7E-10 | 8.1E-09 | 1.8  | 6.6E-03 | 1.0E-01 |
| AT2G39240 | AT2G39240 | RNA polymerase I specific transcription initiation factor RRN3 protein                             | 5.9 | 5.2E-04 | 2.9E-03 | 2.6  | 3.3E-02 | 2.4E-01 |
| AT5G49730 | FRO6      | ferric reduction oxidase 6                                                                         | 5.9 | 3.1E-06 | 3.7E-05 | 1.8  | 9.1E-02 | 3.8E-01 |
| AT1G32780 | AT1G32780 | GroES-like zinc-binding dehydrogenase family protein                                               | 5.9 | 5.3E-16 | 1.3E-13 | 1.1  | 5.1E-01 | 7.9E-01 |
| AT5G24155 | AT5G24155 | FAD/NAD(P)-binding oxidoreductase family protein                                                   | 5.8 | 3.5E-13 | 3.6E-11 | 1.4  | 4.5E-02 | 2.8E-01 |
| AT1G73650 | AT1G73650 | 3-oxo-5-alpha-steroid 4-dehydrogenase (DUF1295)                                                    | 5.8 | 1.2E-19 | 7.4E-17 | 1.4  | 1.7E-03 | 5.0E-02 |
| AT5G24120 | SIGE      | sigma factor E                                                                                     | 5.8 | 6.7E-17 | 2.1E-14 | 1.3  | 1.9E-02 | 1.8E-01 |
| AT3G28220 | AT3G28220 | TRAF-like family protein                                                                           | 5.8 | 1.9E-09 | 6.5E-08 | 1.7  | 1.4E-02 | 1.6E-01 |
| AT1G23550 | SRO2      | similar to RCD one 2                                                                               | 5.7 | 3.8E-15 | 6.8E-13 | 1.2  | 2.5E-01 | 6.0E-01 |
| AT3G25260 | AT3G25260 | Major facilitator superfamily protein                                                              | 5.7 | 3.9E-03 | 1.5E-02 | 4.7  | 1.9E-02 | 1.8E-01 |
| AT4G27030 | FADA      | fatty acid desaturase A                                                                            | 5.7 | 2.5E-13 | 2.7E-11 | 1.7  | 5.5E-04 | 2.5E-02 |
| AT1G30530 | UGT78D1   | UDP-glucosyl transferase 78D1                                                                      | 5.7 | 2.5E-13 | 2.7E-11 | 1.3  | 1.0E-01 | 4.1E-01 |
| AT5G17165 | AT5G17165 | hypothetical protein                                                                               | 5.6 | 1.6E-16 | 4.6E-14 | 1.2  | 3.0E-01 | 6.4E-01 |
| AT5G10230 | ANNAT7    | annexin 7                                                                                          | 5.6 | 1.6E-08 | 3.9E-07 | 2.2  | 3.0E-03 | 7.0E-02 |
| AT2G29090 | CYP707A2  | cytochrome P450, family 707, subfamily A, polypeptide 2                                            | 5.6 | 3.4E-09 | 1.1E-07 | 1.9  | 6.9E-03 | 1.1E-01 |
| AT2G23000 | scpl10    | serine carboxypeptidase-like 10                                                                    | 5.5 | 3.0E-10 | 1.3E-08 | 1.4  | 9.6E-02 | 3.9E-01 |
| AT3G44970 | AT3G44970 | Cytochrome P450 superfamily protein                                                                | 5.5 | 4.7E-06 | 5.3E-05 | 1.4  | 2.5E-01 | 6.0E-01 |
| AT2G32530 | CSLB03    | cellulose synthase-like B3                                                                         | 5.5 | 2.2E-12 | 1.7E-10 | 1.5  | 1.7E-02 | 1.7E-01 |
| AT2G36970 | AT2G36970 | UDP-Glycosyltransferase superfamily protein                                                        | 5.5 | 2.5E-09 | 8.2E-08 | 1.3  | 2.4E-01 | 5.9E-01 |
| AT5G44590 | AT5G44590 | S-adenosyl-L-methionine-dependent methyltransferases superfamily protein                           | 5.4 | 1.0E-03 | 5.0E-03 | -2.4 | 8.6E-02 | 3.7E-01 |
| AT4G09750 | AT4G09750 | NAD(P)-binding Rossmann-fold superfamily protein                                                   | 5.4 | 6.5E-24 | 2.3E-20 | 1.6  | 2.3E-08 | 1.7E-05 |
| AT2G36885 | AT2G36885 | translation initiation factor                                                                      | 5.3 | 2.1E-11 | 1.3E-09 | 1.8  | 1.3E-03 | 4.3E-02 |
| AT5G36790 | AT5G36790 | Haloacid dehalogenase-like hydrolase (HAD) superfamily protein                                     | 5.3 | 6.3E-08 | 1.3E-06 | 2.1  | 2.8E-03 | 6.6E-02 |
| AT1G24580 | AT1G24580 | RING/U-box superfamily protein                                                                     | 5.3 | 2.3E-08 | 5.5E-07 | -1.0 | 9.7E-01 | 1.0E+00 |
| AT5G44110 | ABC121    | P-loop containing nucleoside triphosphate hydrolases superfamily protein                           | 5.3 | 5.3E-13 | 5.2E-11 | 1.2  | 2.1E-01 | 5.6E-01 |
| AT5G51720 | NEET      | 2 iron, 2 sulfur cluster binding protein                                                           | 5.3 | 1.5E-09 | 5.4E-08 | 1.6  | 2.7E-02 | 2.1E-01 |
| AT2G16890 | AT2G16890 | UDP-Glycosyltransferase superfamily protein                                                        | 5.2 | 1.5E-15 | 3.1E-13 | -1.2 | 2.4E-01 | 5.9E-01 |
| AT1G16730 | UP6       | hypothetical protein                                                                               | 5.2 | 7.2E-11 | 3.7E-09 | 1.7  | 8.5E-03 | 1.2E-01 |
| AT5G58120 | AT5G58120 | Disease resistance protein (TIR-NBS-LRR class) family                                              | 5.2 | 9.8E-11 | 4.9E-09 | 1.2  | 2.8E-01 | 6.3E-01 |
| AT3G62410 | CP12-2    | CP12 domain-containing protein 2                                                                   | 5.1 | 1.2E-13 | 1.4E-11 | 1.8  | 5.1E-05 | 5.2E-03 |
| AT2G21970 | SEP2      | stress enhanced protein 2                                                                          | 5.1 | 2.0E-22 | 3.4E-19 | 1.3  | 1.5E-03 | 4.7E-02 |
| AT5G24210 | AT5G24210 | alpha/beta-Hydrolases superfamily protein                                                          | 5.1 | 4.2E-09 | 1.3E-07 | 1.7  | 1.9E-02 | 1.8E-01 |
| AT5G07190 | ATS3      | embryo-specific protein 3                                                                          | 5.0 | 7.8E-04 | 4.0E-03 | 1.9  | 2.2E-01 | 5.7E-01 |
| AT2G13680 | CALS5     | callose synthase 5                                                                                 | 5.0 | 3.3E-05 | 2.8E-04 | 2.3  | 1.0E-01 | 4.0E-01 |
| AT1G13650 | AT1G13650 | hypothetical protein                                                                               | 5.0 | 6.6E-08 | 1.3E-06 | 2.5  | 2.3E-03 | 6.0E-02 |
| AT3G62990 | AT3G62990 | myelin transcription factor-like protein                                                           | 4.9 | 1.1E-06 | 1.6E-05 | 1.3  | 3.7E-01 | 7.0E-01 |
| AT1G78720 | AT1G78720 | SecY protein transport family protein                                                              | 4.9 | 9.3E-07 | 1.3E-05 | 1.2  | 5.9E-01 | 8.4E-01 |
| AT3G12955 | AT3G12955 | SAUR-like auxin-responsive protein family                                                          | 4.9 | 5.2E-08 | 1.1E-06 | -1.2 | 5.9E-01 | 8.4E-01 |
| AT5G05410 | DREB2A    | DRE-binding protein 2A                                                                             | 4.9 | 8.0E-15 | 1.3E-12 | 1.4  | 9.2E-03 | 1.2E-01 |
| AT5G22300 | NIT4      | nitrilase 4                                                                                        | 4.8 | 2.7E-08 | 6.2E-07 | -1.1 | 6.6E-01 | 8.8E-01 |
| AT4G27360 | AT4G27360 | Dynein light chain type 1 family protein                                                           | 4.8 | 2.3E-06 | 2.9E-05 | 1.9  | 6.1E-02 | 3.2E-01 |
| AT4G25640 | DTX35     | detoxifying efflux carrier 35                                                                      | 4.8 | 2.6E-20 | 1.9E-17 | 1.2  | 7.0E-03 | 1.1E-01 |
| AT1G02813 | AT1G02813 | pectinesterase (Protein of unknown function, DUF538)                                               | 4.8 | 1.4E-02 | 4.2E-02 | 2.5  | 2.4E-01 | 5.9E-01 |
| AT1G76570 | AT1G76570 | Chlorophyll A-B binding family protein                                                             | 4.8 | 1.2E-14 | 1.8E-12 | 1.2  | 1.4E-01 | 4.6E-01 |
| AT4G13810 | RLP47     | receptor like protein 47                                                                           | 4.8 | 1.2E-06 | 1.7E-05 | 1.2  | 4.5E-01 | 7.6E-01 |
| AT2G37040 | PAL1      | PHE ammonia lyase 1                                                                                | 4.8 | 1.7E-18 | 7.3E-16 | 1.3  | 3.1E-03 | 7.0E-02 |
| AT3G48350 | CEP3      | Cysteine proteinases superfamily protein                                                           | 4.8 | 2.7E-10 | 1.2E-08 | 1.1  | 7.3E-01 | 9.1E-01 |
| AT5G49740 | FRO7      | ferric reduction oxidase 7                                                                         | 4.7 | 6.7E-08 | 1.4E-06 | 1.3  | 2.6E-01 | 6.0E-01 |
| AT2G41040 | AT2G41040 | S-adenosyl-L-methionine-dependent methyltransferases superfamily protein                           | 4.7 | 2.3E-17 | 8.3E-15 | 1.2  | 3.8E-02 | 2.6E-01 |
| AT3G46090 | ZAT7      | C2H2 and C2HC zinc fingers superfamily protein                                                     | 4.7 | 1.1E-02 | 3.5E-02 | 1.4  | 6.2E-01 | 8.6E-01 |
| AT5G43570 | AT5G43570 | Serine protease inhibitor, potato inhibitor I-type family protein                                  | 4.7 | 4.5E-06 | 5.1E-05 | 1.3  | 4.1E-01 | 7.3E-01 |
| AT4G21200 | GA2OX8    | gibberellin 2-oxidase 8                                                                            | 4.7 | 4.9E-06 | 5.5E-05 | -1.6 | 1.4E-01 | 4.7E-01 |
| AT5G51950 | AT5G51950 | Glucose-methanol-choline (GMC) oxidoreductase family protein                                       | 4.7 | 3.4E-06 | 4.0E-05 | 1.2  | 7.0E-01 | 8.9E-01 |
| AT3G47830 | AT3G47830 | DNA glycosylase superfamily protein                                                                | 4.7 | 1.1E-05 | 1.1E-04 | 1.2  | 5.3E-01 | 8.1E-01 |
| AT5G24850 | CRY3      | cryptochrome 3                                                                                     | 4.6 | 1.8E-14 | 2.5E-12 | 1.3  | 2.6E-02 | 2.1E-01 |
| AT1G12100 | AT1G12100 | Bifunctional inhibitor/lipid-transfer protein/seed storage 2S albumin superfamily protein          | 4.6 | 2.8E-04 | 1.7E-03 | -1.1 | 8.3E-01 | 9.5E-01 |
| AT2G21650 | MEE3      | Homeodomain-like superfamily protein                                                               | 4.6 | 1.5E-02 | 4.6E-02 | -2.4 | 4.0E-01 | 7.2E-01 |
| AT5G54060 | UF3GT     | UDP-glucose:flavonoid 3-o-glucosyltransferase                                                      | 4.6 | 6.3E-03 | 2.2E-02 | 1.9  | 2.6E-01 | 6.1E-01 |
| AT4G10120 | ATSPS4F   | Sucrose-phosphate synthase family protein                                                          | 4.6 | 9.7E-11 | 4.9E-09 | 1.4  | 4.4E-02 | 2.7E-01 |
| AT3G11110 | AT3G11110 | RING/U-box superfamily protein                                                                     | 4.5 | 3.0E-06 | 3.7E-05 | 1.8  | 5.2E-02 | 2.9E-01 |
| AT5G50100 | AT5G50100 | Putative thiol-disulfide oxidoreductase DCC                                                        | 4.5 | 8.2E-16 | 1.9E-13 | 1.4  | 2.4E-03 | 6.2E-02 |
| AT1G19550 | AT1G19550 | Glutathione S-transferase family protein                                                           | 4.5 | 1.9E-04 | 1.2E-03 | -1.7 | 1.6E-01 | 5.0E-01 |
| AT1G12370 | PHR1      | photolyase 1                                                                                       | 4.5 | 6.8E-14 | 8.4E-12 | 1.5  | 2.4E-03 | 6.2E-02 |
| AT3G56260 | AT3G56260 | hypothetical protein                                                                               | 4.5 | 5.2E-08 | 1.1E-06 | 2.1  | 5.1E-03 | 9.1E-02 |



|           |                  |                                                                                                                                       |     |         |         |      |         |         |
|-----------|------------------|---------------------------------------------------------------------------------------------------------------------------------------|-----|---------|---------|------|---------|---------|
| AT5G13170 | <i>SAG29</i>     | senescence-associated gene 29                                                                                                         | 4.5 | 4.4E-04 | 2.5E-03 | 2.6  | 2.6E-02 | 2.1E-01 |
| AT1G20470 | <i>AT1G20470</i> | SAUR-like auxin-responsive protein family                                                                                             | 4.5 | 1.7E-10 | 7.9E-09 | -1.1 | 5.0E-01 | 7.9E-01 |
| AT4G33010 | <i>GLDP1</i>     | glycine decarboxylase P-protein 1                                                                                                     | 4.5 | 2.5E-11 | 1.5E-09 | 1.6  | 3.7E-03 | 7.6E-02 |
| AT3G11050 | <i>FER2</i>      | ferritin 2                                                                                                                            | 4.5 | 3.5E-10 | 1.5E-08 | 1.6  | 8.1E-03 | 1.1E-01 |
| AT2G38210 | <i>PDX1L4</i>    | putative PDX1-like protein 4                                                                                                          | 4.5 | 1.7E-11 | 1.0E-09 | -1.0 | 9.8E-01 | 1.0E+00 |
| AT5G15970 | <i>KIN2</i>      | stress-responsive protein (KIN2) / stress-induced protein (KIN2) / cold-responsive protein (COR6.6) / cold-regulated protein (COR6.6) | 4.4 | 9.2E-07 | 1.3E-05 | 1.1  | 7.9E-01 | 9.3E-01 |
| AT5G23000 | <i>MYB37</i>     | myb domain protein 37                                                                                                                 | 4.4 | 1.2E-05 | 1.2E-04 | 1.1  | 8.3E-01 | 9.5E-01 |
| AT5G44568 | <i>AT5G44568</i> | transmembrane protein                                                                                                                 | 4.4 | 2.1E-06 | 2.6E-05 | 1.3  | 2.9E-01 | 6.4E-01 |
| AT5G05580 | <i>FAD8</i>      | fatty acid desaturase 8                                                                                                               | 4.4 | 5.9E-10 | 2.3E-08 | 1.8  | 1.3E-03 | 4.4E-02 |
| AT3G06490 | <i>MYB108</i>    | myb domain protein 108                                                                                                                | 4.4 | 6.4E-04 | 3.4E-03 | -2.0 | 1.7E-01 | 5.1E-01 |
| AT1G66100 | <i>AT1G66100</i> | Plant thionin                                                                                                                         | 4.4 | 2.5E-04 | 1.5E-03 | -1.1 | 7.5E-01 | 9.2E-01 |
| AT2G36870 | <i>XTH32</i>     | xyloglucan endotransglucosylase/hydrolase 32                                                                                          | 4.4 | 3.0E-13 | 3.1E-11 | 1.3  | 4.7E-02 | 2.8E-01 |
| AT5G40210 | <i>UMAMIT42</i>  | nodulin MtN21 /EamA-like transporter family protein                                                                                   | 4.3 | 4.7E-07 | 7.4E-06 | -1.7 | 4.3E-02 | 2.7E-01 |
| AT3G19170 | <i>PREP1</i>     | presequence protease 1                                                                                                                | 4.3 | 1.3E-16 | 3.7E-14 | 1.5  | 6.9E-05 | 6.4E-03 |
| AT1G42560 | <i>MLO9</i>      | Seven transmembrane MLO family protein                                                                                                | 4.3 | 6.8E-06 | 7.3E-05 | 2.1  | 1.4E-02 | 1.5E-01 |
| AT4G01660 | <i>ABC1</i>      | ABC transporter 1                                                                                                                     | 4.3 | 1.1E-23 | 3.5E-20 | 1.1  | 3.2E-01 | 6.7E-01 |
| AT3G07700 | <i>AT3G07700</i> | Protein kinase superfamily protein                                                                                                    | 4.3 | 1.2E-18 | 5.6E-16 | 1.4  | 1.6E-04 | 1.1E-02 |
| AT4G04850 | <i>KEA3</i>      | K efflux antiporter 3                                                                                                                 | 4.3 | 5.0E-14 | 6.4E-12 | 1.4  | 7.0E-03 | 1.1E-01 |
| AT1G35140 | <i>PHI-1</i>     | Phosphate-responsive 1 family protein                                                                                                 | 4.2 | 4.2E-10 | 1.8E-08 | -1.1 | 6.8E-01 | 8.8E-01 |
| AT5G05390 | <i>LAC12</i>     | laccase 12                                                                                                                            | 4.2 | 4.4E-05 | 3.5E-04 | 2.7  | 5.6E-03 | 9.6E-02 |
| AT3G53260 | <i>PAL2</i>      | phenylalanine ammonia-lyase 2                                                                                                         | 4.2 | 2.4E-17 | 8.8E-15 | 1.2  | 9.1E-02 | 3.8E-01 |
| AT2G46750 | <i>GuILO2</i>    | D-arabinono-1,4-lactone oxidase family protein                                                                                        | 4.2 | 1.6E-05 | 1.5E-04 | 2.0  | 1.4E-02 | 1.5E-01 |
| AT5G17010 | <i>AT5G17010</i> | Major facilitator superfamily protein                                                                                                 | 4.2 | 1.4E-19 | 8.3E-17 | 1.2  | 4.9E-02 | 2.9E-01 |
| AT4G30650 | <i>AT4G30650</i> | Low temperature and salt responsive protein family                                                                                    | 4.2 | 1.1E-08 | 2.9E-07 | 1.4  | 8.5E-02 | 3.7E-01 |
| AT2G35660 | <i>CTF2A</i>     | FAD/NAD(P)-binding oxidoreductase family protein                                                                                      | 4.2 | 4.4E-16 | 1.1E-13 | 1.4  | 2.5E-03 | 6.3E-02 |
| AT2G24540 | <i>AFR</i>       | Galactose oxidase/kelch repeat superfamily protein                                                                                    | 4.1 | 1.2E-18 | 5.6E-16 | 1.4  | 1.0E-04 | 8.5E-03 |
| AT1G61300 | <i>AT1G61300</i> | LRR and NB-ARC domains-containing disease resistance protein                                                                          | 4.1 | 1.6E-08 | 4.0E-07 | 1.6  | 2.5E-02 | 2.1E-01 |
| AT3G29200 | <i>CM1</i>       | chorismate mutase 1                                                                                                                   | 4.1 | 2.1E-19 | 1.2E-16 | 1.3  | 3.0E-03 | 7.0E-02 |
| AT1G62510 | <i>AT1G62510</i> | Bifunctional inhibitor/lipid-transfer protein/seed storage 2S albumin superfamily protein                                             | 4.1 | 7.8E-08 | 1.5E-06 | 1.1  | 6.7E-01 | 8.8E-01 |
| AT5G44050 | <i>AT5G44050</i> | MATE efflux family protein                                                                                                            | 4.1 | 8.7E-11 | 4.5E-09 | 1.1  | 7.2E-01 | 9.0E-01 |
| AT1G47510 | <i>SPTASE11</i>  | inositol polyphosphate 5-phosphatase 11                                                                                               | 4.1 | 8.6E-04 | 4.3E-03 | 2.1  | 1.1E-01 | 4.2E-01 |
| AT4G17090 | <i>CT-BMY</i>    | chloroplast beta-amylase                                                                                                              | 4.1 | 5.2E-09 | 1.5E-07 | 1.5  | 2.4E-02 | 2.0E-01 |
| AT5G24200 | <i>AT5G24200</i> | alpha/beta-Hydrolases superfamily protein                                                                                             | 4.1 | 8.0E-03 | 2.7E-02 | 2.1  | 1.5E-01 | 4.8E-01 |
| AT4G27820 | <i>BGLU9</i>     | beta glucosidase 9                                                                                                                    | 4.1 | 2.3E-13 | 2.6E-11 | 1.4  | 1.1E-02 | 1.4E-01 |
| AT4G14090 | <i>AT4G14090</i> | UDP-Glycosyltransferase superfamily protein                                                                                           | 4.1 | 1.3E-02 | 4.0E-02 | 1.2  | 7.6E-01 | 9.2E-01 |
| AT2G41660 | <i>MIZ1</i>      | MIZU-KUSSEI-like protein (Protein of unknown function, DUF617)                                                                        | 4.1 | 4.3E-14 | 5.6E-12 | 1.4  | 4.2E-03 | 8.3E-02 |
| AT1G28170 | <i>SOT7</i>      | sulfotransferase 7                                                                                                                    | 4.1 | 1.0E-02 | 3.3E-02 | 1.2  | 6.4E-01 | 8.6E-01 |
| AT4G36530 | <i>AT4G36530</i> | alpha/beta-Hydrolases superfamily protein                                                                                             | 4.0 | 2.2E-15 | 4.1E-13 | 1.2  | 5.4E-02 | 3.0E-01 |
| AT2G37970 | <i>SOUL-1</i>    | SOUL heme-binding family protein                                                                                                      | 4.0 | 3.8E-18 | 1.5E-15 | 1.4  | 8.4E-05 | 7.4E-03 |
| AT1G78510 | <i>SPS1</i>      | solaneyl diphosphate synthase 1                                                                                                       | 4.0 | 1.4E-18 | 6.4E-16 | 1.2  | 9.6E-03 | 1.3E-01 |
| AT1G16720 | <i>HCF173</i>    | high chlorophyll fluorescence phenotype 173                                                                                           | 4.0 | 8.9E-13 | 8.0E-11 | 1.6  | 4.8E-04 | 2.3E-02 |
| AT4G17098 | <i>AT4G17098</i> | Natural antisense transcript overlaps with AT4G17100                                                                                  | 4.0 | 4.2E-10 | 1.7E-08 | 1.6  | 8.2E-03 | 1.2E-01 |
| AT2G36630 | <i>AT2G36630</i> | Sulfite exporter TauE/SafE family protein                                                                                             | 4.0 | 3.8E-13 | 3.9E-11 | 1.5  | 2.5E-03 | 6.2E-02 |
| AT1G70000 | <i>AT1G70000</i> | myb-like transcription factor family protein                                                                                          | 4.0 | 9.8E-17 | 2.9E-14 | 1.3  | 4.7E-03 | 8.7E-02 |
| AT4G29590 | <i>AT4G29590</i> | S-adenosyl-L-methionine-dependent methyltransferases superfamily protein                                                              | 4.0 | 3.3E-18 | 1.3E-15 | 1.5  | 3.2E-05 | 3.8E-03 |
| AT2G05440 | <i>GRP9</i>      | GLYCINE RICH PROTEIN 9                                                                                                                | 4.0 | 1.5E-06 | 1.9E-05 | 1.8  | 1.6E-02 | 1.6E-01 |
| AT3G61220 | <i>SDR1</i>      | NAD(P)-binding Rossmann-fold superfamily protein                                                                                      | 4.0 | 1.6E-15 | 3.3E-13 | 1.6  | 7.3E-05 | 6.7E-03 |
| AT1G62620 | <i>AT1G62620</i> | Flavin-binding monooxygenase family protein                                                                                           | 4.0 | 1.4E-04 | 9.3E-04 | -1.0 | 9.5E-01 | 9.9E-01 |
| AT3G24190 | <i>AT3G24190</i> | Protein kinase superfamily protein                                                                                                    | 4.0 | 3.8E-16 | 9.7E-14 | 1.3  | 3.5E-03 | 7.4E-02 |
| AT2G01580 | <i>AT2G01580</i> | transmembrane protein                                                                                                                 | 4.0 | 5.1E-04 | 2.8E-03 | 2.4  | 2.0E-02 | 1.8E-01 |
| AT5G60540 | <i>PDX2</i>      | pyridoxine biosynthesis 2                                                                                                             | 4.0 | 2.0E-21 | 2.1E-18 | 1.1  | 4.6E-02 | 2.8E-01 |
| AT1G06170 | <i>AT1G06170</i> | basic helix-loop-helix (bHLH) DNA-binding superfamily protein                                                                         | 3.9 | 3.2E-05 | 2.7E-04 | -1.5 | 2.0E-01 | 5.4E-01 |
| AT5G43860 | <i>CLH2</i>      | chlorophyllase 2                                                                                                                      | 3.9 | 1.0E-10 | 5.0E-09 | -1.1 | 4.2E-01 | 7.3E-01 |
| AT2G42150 | <i>AT2G42150</i> | DNA-binding bromodomain-containing protein                                                                                            | 3.9 | 2.3E-06 | 2.9E-05 | 1.7  | 5.5E-02 | 3.0E-01 |
| AT1G72490 | <i>AT1G72490</i> | hypothetical protein                                                                                                                  | 3.9 | 3.7E-06 | 4.3E-05 | 1.3  | 3.6E-01 | 6.9E-01 |
| AT4G01883 | <i>AT4G01883</i> | Polyketide cyclase / dehydrase and lipid transport protein                                                                            | 3.9 | 8.0E-12 | 5.4E-10 | 1.6  | 2.4E-03 | 6.1E-02 |
| AT1G17100 | <i>HBP1</i>      | SOUL heme-binding family protein                                                                                                      | 3.9 | 1.6E-15 | 3.3E-13 | 1.2  | 4.1E-02 | 2.6E-01 |
| AT5G11260 | <i>HY5</i>       | Basic-leucine zipper (bZIP) transcription factor family protein                                                                       | 3.9 | 9.8E-15 | 1.5E-12 | 1.0  | 7.5E-01 | 9.2E-01 |
| AT5G19850 | <i>AT5G19850</i> | alpha/beta-Hydrolases superfamily protein                                                                                             | 3.9 | 7.2E-15 | 1.2E-12 | 1.5  | 2.0E-04 | 1.3E-02 |
| AT2G40200 | <i>AT2G40200</i> | basic helix-loop-helix (bHLH) DNA-binding superfamily protein                                                                         | 3.9 | 1.7E-06 | 2.2E-05 | -1.3 | 3.6E-01 | 7.0E-01 |
| AT3G54420 | <i>EP3</i>       | homolog of carrot EP3-3 chitinase                                                                                                     | 3.9 | 8.1E-09 | 2.2E-07 | 1.4  | 6.1E-02 | 3.2E-01 |
| AT4G26950 | <i>AT4G26950</i> | senescence regulator (Protein of unknown function, DUF584)                                                                            | 3.9 | 3.3E-03 | 1.3E-02 | -1.3 | 6.5E-01 | 8.7E-01 |
| AT3G44720 | <i>ADT4</i>      | arogenate dehydratase 4                                                                                                               | 3.9 | 5.3E-24 | 2.3E-20 | 1.1  | 1.8E-01 | 5.3E-01 |
| AT4G15680 | <i>AT4G15680</i> | Thioredoxin superfamily protein                                                                                                       | 3.9 | 4.0E-04 | 2.3E-03 | 1.4  | 3.4E-01 | 6.8E-01 |
| AT5G52250 | <i>RUP1</i>      | Transducin/WD40 repeat-like superfamily protein                                                                                       | 3.9 | 4.6E-16 | 1.1E-13 | -1.2 | 1.0E-01 | 4.1E-01 |
| AT4G04750 | <i>AT4G04750</i> | Major facilitator superfamily protein                                                                                                 | 3.9 | 2.9E-10 | 1.2E-08 | -1.0 | 8.1E-01 | 9.4E-01 |
| AT1G20120 | <i>AT1G20120</i> | GDSL-like Lipase/Acylhydrolase superfamily protein                                                                                    | 3.9 | 6.0E-03 | 2.2E-02 | 1.5  | 4.7E-01 | 7.7E-01 |
| AT2G46790 | <i>PRR9</i>      | pseudo-response regulator 9                                                                                                           | 3.8 | 2.5E-07 | 4.3E-06 | 1.1  | 5.9E-01 | 8.4E-01 |
| AT5G53200 | <i>TRY</i>       | Homeodomain-like superfamily protein                                                                                                  | 3.8 | 2.1E-07 | 3.6E-06 | 1.8  | 2.6E-02 | 2.1E-01 |
| AT5G49350 | <i>AT5G49350</i> | Glycine-rich protein family                                                                                                           | 3.8 | 8.0E-03 | 2.7E-02 | 2.4  | 5.5E-02 | 3.0E-01 |

|           |                   |                                                                          |     |         |         |      |         |         |
|-----------|-------------------|--------------------------------------------------------------------------|-----|---------|---------|------|---------|---------|
| AT2G45800 | <i>PLIM2a</i>     | GATA type zinc finger transcription factor family protein                | 3.8 | 7.9E-05 | 5.8E-04 | -1.3 | 4.2E-01 | 7.4E-01 |
| AT2G29270 | <i>AT2G29270</i>  | pseudogene of senescence-associated gene 13                              | 3.8 | 3.0E-03 | 1.2E-02 | -1.6 | 2.4E-01 | 5.9E-01 |
| AT4G27570 | <i>AT4G27570</i>  | UDP-Glycosyltransferase superfamily protein                              | 3.8 | 3.8E-03 | 1.5E-02 | 2.5  | 1.5E-01 | 4.8E-01 |
| AT1G55010 | <i>PDF1.5</i>     | plant defensin 1.5                                                       | 3.8 | 3.3E-03 | 1.3E-02 | -3.1 | 6.6E-02 | 3.3E-01 |
| AT5G01410 | <i>RSR4</i>       | Aldolase-type TIM barrel family protein                                  | 3.8 | 8.5E-19 | 4.3E-16 | 1.3  | 3.6E-04 | 2.0E-02 |
| AT2G38465 | <i>AT2G38465</i>  | hypothetical protein                                                     | 3.8 | 1.2E-10 | 5.8E-09 | 1.4  | 4.7E-02 | 2.8E-01 |
| AT2G14060 | <i>AT2G14060</i>  | S-adenosyl-L-methionine-dependent methyltransferases superfamily protein | 3.8 | 3.2E-05 | 2.7E-04 | -1.4 | 2.4E-01 | 5.9E-01 |
| AT4G17480 | <i>AT4G17480</i>  | alpha/beta-Hydrolases superfamily protein                                | 3.8 | 2.2E-03 | 9.2E-03 | -1.2 | 5.7E-01 | 8.3E-01 |
| AT1G19510 | <i>RL5</i>        | RAD-like 5                                                               | 3.8 | 9.3E-05 | 6.7E-04 | -1.1 | 7.9E-01 | 9.3E-01 |
| AT3G14690 | <i>CYP72A15</i>   | cytochrome P450, family 72, subfamily A, polypeptide 15                  | 3.8 | 1.0E-20 | 7.8E-18 | 1.4  | 5.8E-06 | 1.1E-03 |
| AT1G03055 | <i>D27</i>        | beta-carotene isomerase D27-like protein                                 | 3.8 | 9.9E-07 | 1.4E-05 | 1.6  | 7.7E-02 | 3.5E-01 |
| AT4G36220 | <i>FAH1</i>       | ferulic acid 5-hydroxylase 1                                             | 3.8 | 9.4E-14 | 1.1E-11 | -1.0 | 8.4E-01 | 9.5E-01 |
| AT3G28160 | <i>AT3G28160</i>  | transposable_element_gene                                                | 3.8 | 8.6E-15 | 1.3E-12 | 1.3  | 1.4E-02 | 1.6E-01 |
| AT1G66780 | <i>AT1G66780</i>  | MATE efflux family protein                                               | 3.8 | 2.4E-03 | 1.0E-02 | 1.2  | 7.9E-01 | 9.3E-01 |
| AT5G54710 | <i>AT5G54710</i>  | Ankyrin repeat family protein                                            | 3.8 | 3.5E-08 | 7.8E-07 | 1.4  | 1.2E-01 | 4.3E-01 |
| AT3G06220 | <i>AT3G06220</i>  | AP2/B3-like transcriptional factor family protein                        | 3.7 | 1.1E-02 | 3.4E-02 | 1.0  | 9.2E-01 | 9.8E-01 |
| AT5G54720 | <i>AT5G54720</i>  | Ankyrin repeat family protein                                            | 3.7 | 5.4E-06 | 5.9E-05 | 1.2  | 3.9E-01 | 7.2E-01 |
| AT4G15810 | <i>AT4G15810</i>  | P-loop containing nucleoside triphosphate hydrolases superfamily protein | 3.7 | 2.3E-12 | 1.8E-10 | 1.3  | 3.6E-02 | 2.5E-01 |
| AT1G17600 | <i>AT1G17600</i>  | Disease resistance protein (TIR-NBS-LRR class) family                    | 3.7 | 8.9E-05 | 6.4E-04 | 1.4  | 2.9E-01 | 6.4E-01 |
| AT3G09650 | <i>HCF152</i>     | Tetratricopeptide repeat (TPR)-like superfamily protein                  | 3.7 | 1.2E-14 | 1.8E-12 | 1.1  | 2.5E-01 | 6.0E-01 |
| AT4G12830 | <i>AT4G12830</i>  | alpha/beta-Hydrolases superfamily protein                                | 3.7 | 1.1E-08 | 3.0E-07 | 1.8  | 1.4E-03 | 4.5E-02 |
| AT1G17050 | <i>SPS2</i>       | solaneyl diphosphate synthase 2                                          | 3.7 | 4.0E-15 | 7.0E-13 | 1.7  | 2.6E-06 | 5.9E-04 |
| AT1G19140 | <i>AT1G19140</i>  | ubiquinone biosynthesis COQ9-like protein                                | 3.7 | 2.5E-16 | 6.7E-14 | 1.2  | 8.2E-02 | 3.6E-01 |
| AT4G37310 | <i>CYP81H1</i>    | cytochrome P450, family 81, subfamily H, polypeptide 1                   | 3.7 | 1.7E-15 | 3.3E-13 | 1.7  | 2.2E-06 | 5.3E-04 |
| AT1G06550 | <i>AT1G06550</i>  | ATP-dependent caseinolytic (Clp) protease/crotonase family protein       | 3.7 | 2.8E-20 | 1.9E-17 | 1.1  | 5.7E-02 | 3.1E-01 |
| AT3G56890 | <i>AT3G56890</i>  | F-box associated ubiquitination effector family protein                  | 3.7 | 4.9E-06 | 5.5E-05 | 1.1  | 7.9E-01 | 9.3E-01 |
| AT1G79510 | <i>AT1G79510</i>  | hypothetical protein (DUF2358)                                           | 3.6 | 1.3E-11 | 8.4E-10 | 1.4  | 1.5E-02 | 1.6E-01 |
| AT2G39560 | <i>AT2G39560</i>  | Putative membrane lipoprotein                                            | 3.6 | 4.2E-08 | 9.1E-07 | 1.3  | 1.3E-01 | 4.6E-01 |
| AT1G64770 | <i>PnsB2</i>      | NDH-dependent cyclic electron flow 1                                     | 3.6 | 1.2E-12 | 1.1E-10 | 1.5  | 6.6E-04 | 2.9E-02 |
| AT5G57785 | <i>AT5G57785</i>  | hypothetical protein                                                     | 3.6 | 2.1E-09 | 7.0E-08 | 1.6  | 5.9E-03 | 9.9E-02 |
| AT1G33720 | <i>CYP76C6</i>    | cytochrome P450, family 76, subfamily C, polypeptide 6                   | 3.6 | 1.9E-04 | 1.2E-03 | -1.3 | 4.5E-01 | 7.5E-01 |
| AT3G21670 | <i>AT3G21670</i>  | Major facilitator superfamily protein                                    | 3.6 | 1.2E-07 | 2.2E-06 | 1.3  | 1.4E-01 | 4.8E-01 |
| AT3G23410 | <i>FAO3</i>       | fatty alcohol oxidase 3                                                  | 3.6 | 1.6E-14 | 2.4E-12 | 1.2  | 6.7E-02 | 3.3E-01 |
| AT2G45360 | <i>AT2G45360</i>  | ankyrin repeat/KH domain protein (DUF1442)                               | 3.6 | 3.0E-06 | 3.6E-05 | 1.6  | 5.6E-02 | 3.0E-01 |
| AT1G60270 | <i>BGLU6</i>      | beta glucosidase 6                                                       | 3.6 | 8.3E-09 | 2.3E-07 | 1.2  | 2.7E-01 | 6.2E-01 |
| AT3G57190 | <i>PrfB3</i>      | peptide chain release factor                                             | 3.6 | 5.2E-14 | 6.5E-12 | 1.3  | 2.2E-02 | 1.9E-01 |
| AT1G09340 | <i>CRB</i>        | chloroplast RNA binding protein                                          | 3.5 | 5.3E-11 | 2.9E-09 | 1.8  | 6.0E-05 | 5.8E-03 |
| AT2G32640 | <i>AT2G32640</i>  | Lycopene beta/epsilon cyclase protein                                    | 3.5 | 9.4E-12 | 6.2E-10 | 1.3  | 3.1E-02 | 2.3E-01 |
| AT4G33660 | <i>AT4G33660</i>  | cysteine-rich TM module stress tolerance protein                         | 3.5 | 9.1E-12 | 6.0E-10 | 1.1  | 4.8E-01 | 7.8E-01 |
| AT4G25700 | <i>BETA-OHASE</i> | beta-hydroxylase 1                                                       | 3.5 | 1.9E-15 | 3.7E-13 | 1.3  | 3.5E-03 | 7.4E-02 |
| AT4G24130 | <i>AT4G24130</i>  | DUF538 family protein (Protein of unknown function, DUF538)              | 3.5 | 1.1E-08 | 2.9E-07 | 1.9  | 3.0E-04 | 1.7E-02 |
| AT3G49630 | <i>AT3G49630</i>  | 2-oxoglutarate (2OG) and Fe(II)-dependent oxygenase superfamily protein  | 3.5 | 7.9E-03 | 2.7E-02 | 2.0  | 7.1E-02 | 3.4E-01 |
| AT2G26080 | <i>GLDP2</i>      | glycine decarboxylase P-protein 2                                        | 3.5 | 5.5E-13 | 5.5E-11 | 1.4  | 1.9E-03 | 5.4E-02 |
| AT3G04420 | <i>NAC048</i>     | NAC domain containing protein 48                                         | 3.5 | 1.0E-04 | 7.3E-04 | -1.1 | 8.1E-01 | 9.4E-01 |
| AT5G51040 | <i>SDHAF2</i>     | succinate dehydrogenase assembly factor                                  | 3.5 | 2.6E-17 | 8.9E-15 | 1.3  | 1.9E-03 | 5.4E-02 |
| AT1G07150 | <i>MAPKKK13</i>   | mitogen-activated protein kinase kinase kinase 13                        | 3.5 | 1.8E-18 | 7.5E-16 | 1.0  | 6.8E-01 | 8.8E-01 |
| AT5G54470 | <i>BBX29</i>      | B-box type zinc finger family protein                                    | 3.5 | 2.2E-05 | 1.9E-04 | -1.1 | 7.7E-01 | 9.2E-01 |
| AT5G51220 | <i>AT5G51220</i>  | ubiquinol-cytochrome C chaperone family protein                          | 3.5 | 2.3E-16 | 6.3E-14 | 1.2  | 3.6E-02 | 2.5E-01 |
| AT2G25780 | <i>AT2G25780</i>  | hypothetical protein (DUF1677)                                           | 3.5 | 8.3E-03 | 2.8E-02 | -1.8 | 1.8E-01 | 5.2E-01 |
| AT3G47070 | <i>AT3G47070</i>  | thylakoid soluble phosphoprotein                                         | 3.5 | 3.2E-12 | 2.4E-10 | 1.4  | 7.9E-03 | 1.1E-01 |
| AT1G47980 | <i>AT1G47980</i>  | desiccation-like protein                                                 | 3.5 | 3.5E-04 | 2.0E-03 | 1.7  | 1.1E-01 | 4.2E-01 |
| AT1G52342 | <i>AT1G52342</i>  | hypothetical protein                                                     | 3.5 | 1.0E-11 | 6.7E-10 | 1.7  | 2.0E-04 | 1.4E-02 |
| AT5G42270 | <i>VAR1</i>       | FtsH extracellular protease family                                       | 3.5 | 5.4E-14 | 6.7E-12 | 1.4  | 1.7E-03 | 5.0E-02 |
| AT2G36800 | <i>DOGT1</i>      | don-glucosyltransferase 1                                                | 3.4 | 1.8E-11 | 1.1E-09 | 1.8  | 4.5E-05 | 4.9E-03 |
| AT2G29300 | <i>AT2G29300</i>  | NAD(P)-binding Rossmann-fold superfamily protein                         | 3.4 | 2.0E-08 | 4.8E-07 | 1.4  | 7.9E-02 | 3.6E-01 |
| AT2G24190 | <i>SDR2</i>       | NAD(P)-binding Rossmann-fold superfamily protein                         | 3.4 | 4.2E-09 | 1.3E-07 | 1.4  | 3.9E-02 | 2.6E-01 |
| AT2G16365 | <i>AT2G16365</i>  | F-box family protein                                                     | 3.4 | 7.2E-19 | 3.7E-16 | 1.3  | 1.7E-03 | 5.0E-02 |
| AT1G24148 | <i>AT1G24148</i>  | hypothetical protein                                                     | 3.4 | 5.6E-07 | 8.6E-06 | 1.1  | 6.8E-01 | 8.8E-01 |
| AT5G54100 | <i>AT5G54100</i>  | SPFH/Band 7/PHB domain-containing membrane-associated protein family     | 3.4 | 9.0E-21 | 7.2E-18 | 1.2  | 2.9E-03 | 6.8E-02 |
| AT2G37720 | <i>TBL15</i>      | TRICHOME BIREFRINGENCE-LIKE 15                                           | 3.4 | 9.9E-05 | 7.0E-04 | 1.9  | 1.2E-01 | 4.3E-01 |
| AT4G17760 | <i>AT4G17760</i>  | PCNA domain-containing protein                                           | 3.4 | 1.8E-08 | 4.4E-07 | 1.6  | 1.2E-02 | 1.4E-01 |
| AT5G14760 | <i>AO</i>         | L-aspartate oxidase                                                      | 3.4 | 2.5E-12 | 2.0E-10 | 1.3  | 1.6E-02 | 1.6E-01 |
| AT3G09930 | <i>AT3G09930</i>  | GDSL-like Lipase/Acylhydrolase superfamily protein                       | 3.4 | 6.7E-03 | 2.3E-02 | 1.6  | 3.8E-01 | 7.1E-01 |
| AT3G01140 | <i>MYB106</i>     | myb domain protein 106                                                   | 3.4 | 6.4E-07 | 9.6E-06 | 1.2  | 3.1E-01 | 6.5E-01 |
| AT3G48460 | <i>AT3G48460</i>  | GDSL-like Lipase/Acylhydrolase superfamily protein                       | 3.4 | 1.4E-15 | 2.9E-13 | 1.2  | 1.1E-01 | 4.2E-01 |
| AT2G36590 | <i>ProT3</i>      | proline transporter 3                                                    | 3.4 | 9.9E-10 | 3.6E-08 | 1.2  | 2.2E-01 | 5.6E-01 |
| AT4G26150 | <i>CGA1</i>       | cytokinin-responsive gata factor 1                                       | 3.4 | 1.3E-10 | 6.1E-09 | 1.2  | 1.5E-01 | 4.8E-01 |
| AT2G40080 | <i>ELF4</i>       | EARLY FLOWERING-like protein (DUF1313)                                   | 3.4 | 4.7E-13 | 4.7E-11 | 1.1  | 2.9E-01 | 6.4E-01 |
| AT2G18120 | <i>SRS4</i>       | SHI-related sequence 4                                                   | 3.3 | 7.1E-05 | 5.3E-04 | -1.3 | 3.8E-01 | 7.1E-01 |
| AT4G27657 | <i>AT4G27657</i>  | hypothetical protein                                                     | 3.3 | 4.9E-08 | 1.0E-06 | 1.4  | 6.2E-02 | 3.2E-01 |

|           |                  |                                                                                                 |     |         |         |      |         |         |
|-----------|------------------|-------------------------------------------------------------------------------------------------|-----|---------|---------|------|---------|---------|
| AT2G40150 | <i>TBL28</i>     | TRICHOME BIREFRINGENCE-LIKE 28                                                                  | 3.3 | 8.5E-16 | 1.9E-13 | -1.0 | 7.1E-01 | 9.0E-01 |
| AT5G20220 | <i>AT5G20220</i> | zinc knuckle (CCHC-type) family protein                                                         | 3.3 | 2.7E-15 | 5.0E-13 | 1.3  | 1.4E-02 | 1.6E-01 |
| AT1G67070 | <i>DIN9</i>      | Mannose-6-phosphate isomerase, type I                                                           | 3.3 | 2.9E-16 | 7.6E-14 | -1.0 | 6.8E-01 | 8.8E-01 |
| AT4G28660 | <i>PSB28</i>     | photosystem II reaction center PSB28 protein                                                    | 3.3 | 9.7E-10 | 3.6E-08 | 1.6  | 2.5E-03 | 6.3E-02 |
| AT3G16350 | <i>AT3G16350</i> | Homeodomain-like superfamily protein                                                            | 3.3 | 7.8E-16 | 1.8E-13 | 1.1  | 1.9E-01 | 5.3E-01 |
| AT4G15660 | <i>AT4G15660</i> | Thioredoxin superfamily protein                                                                 | 3.3 | 7.1E-05 | 2.5E-02 | 2.5  | 6.6E-02 | 3.3E-01 |
| AT1G51820 | <i>AT1G51820</i> | Leucine-rich repeat protein kinase family protein                                               | 3.3 | 7.0E-05 | 5.2E-04 | 1.1  | 7.8E-01 | 9.3E-01 |
| AT3G23530 | <i>AT3G23530</i> | Cyclopropane-fatty-acyl-phospholipid synthase                                                   | 3.3 | 1.1E-12 | 9.8E-11 | 1.3  | 2.7E-02 | 2.1E-01 |
| AT5G67370 | <i>CGLD27</i>    | DUF1230 family protein (DUF1230)                                                                | 3.3 | 3.2E-09 | 1.0E-07 | 1.5  | 1.3E-02 | 1.5E-01 |
| AT1G53670 | <i>MSRB1</i>     | methionine sulfoxide reductase B 1                                                              | 3.3 | 4.9E-17 | 1.6E-14 | 1.1  | 3.6E-01 | 7.0E-01 |
| AT4G11600 | <i>GPX6</i>      | glutathione peroxidase 6                                                                        | 3.3 | 3.2E-14 | 4.3E-12 | 1.5  | 9.0E-05 | 7.7E-03 |
| AT5G65730 | <i>XTH6</i>      | xyloglucan endotransglucosylase/hydrolase 6                                                     | 3.3 | 1.2E-05 | 1.1E-04 | 1.0  | 8.9E-01 | 9.7E-01 |
| AT5G24160 | <i>SQE6</i>      | squalene monooxygenase 6                                                                        | 3.3 | 3.8E-05 | 3.1E-04 | 1.1  | 6.5E-01 | 8.7E-01 |
| AT5G45630 | <i>AT5G45630</i> | senescence regulator (Protein of unknown function, DUF584)                                      | 3.3 | 1.5E-03 | 6.9E-03 | -2.0 | 1.6E-01 | 5.0E-01 |
| AT5G06790 | <i>AT5G06790</i> | cotton fiber protein                                                                            | 3.3 | 1.3E-05 | 1.3E-04 | 1.1  | 8.5E-01 | 9.6E-01 |
| AT1G13670 | <i>AT1G13670</i> | hypothetical protein                                                                            | 3.3 | 3.5E-13 | 3.6E-11 | 1.1  | 6.1E-01 | 8.5E-01 |
| AT1G78820 | <i>AT1G78820</i> | D-mannose binding lectin protein with Apple-like carbohydrate-binding domain-containing protein | 3.3 | 3.8E-09 | 1.2E-07 | 1.0  | 9.2E-01 | 9.8E-01 |
| AT5G66940 | <i>AT5G66940</i> | Dof-type zinc finger DNA-binding family protein                                                 | 3.3 | 2.0E-03 | 8.6E-03 | -1.0 | 9.5E-01 | 9.9E-01 |
| AT2G47890 | <i>AT2G47890</i> | B-box type zinc finger protein with CCT domain-containing protein                               | 3.3 | 2.1E-13 | 2.4E-11 | 1.8  | 1.2E-06 | 3.3E-04 |
| AT5G11410 | <i>AT5G11410</i> | Protein kinase superfamily protein                                                              | 3.3 | 2.0E-04 | 1.3E-03 | -1.2 | 4.9E-01 | 7.8E-01 |
| AT5G22390 | <i>AT5G22390</i> | FANTASTIC four-like protein (DUF3049)                                                           | 3.3 | 8.7E-11 | 4.4E-09 | 1.0  | 7.6E-01 | 9.2E-01 |
| AT3G09520 | <i>EXO70H4</i>   | exocyst subunit exo70 family protein H4                                                         | 3.3 | 2.1E-08 | 5.0E-07 | 1.1  | 4.4E-01 | 7.5E-01 |
| AT3G18950 | <i>AT3G18950</i> | Transducin/WD40 repeat-like superfamily protein                                                 | 3.3 | 6.3E-08 | 1.3E-06 | 1.7  | 3.7E-03 | 7.7E-02 |
| AT5G43840 | <i>HSFA6A</i>    | heat shock transcription factor A6A                                                             | 3.3 | 7.1E-09 | 2.0E-07 | -1.0 | 8.3E-01 | 9.5E-01 |
| AT5G62150 | <i>AT5G62150</i> | peptidoglycan-binding LysM domain-containing protein                                            | 3.3 | 2.5E-06 | 3.1E-05 | 1.1  | 5.7E-01 | 8.3E-01 |
| AT1G50020 | <i>AT1G50020</i> | tubulin alpha-6 chain                                                                           | 3.3 | 2.2E-13 | 2.5E-11 | 1.3  | 5.6E-03 | 9.6E-02 |
| AT2G30040 | <i>MAPKKK14</i>  | mitogen-activated protein kinase kinase kinase 14                                               | 3.3 | 3.0E-15 | 5.5E-13 | 1.1  | 2.8E-01 | 6.2E-01 |
| AT3G16360 | <i>AHP4</i>      | HPT phosphotransmitter 4                                                                        | 3.3 | 6.1E-05 | 4.7E-04 | 1.3  | 2.9E-01 | 6.4E-01 |
| AT1G66330 | <i>AT1G66330</i> | senescence-associated family protein                                                            | 3.3 | 2.1E-14 | 3.0E-12 | 1.3  | 6.1E-03 | 1.0E-01 |
| AT1G50450 | <i>AT1G50450</i> | Saccharopine dehydrogenase                                                                      | 3.2 | 1.6E-13 | 1.9E-11 | 1.3  | 1.0E-02 | 1.3E-01 |
| AT2G38230 | <i>PDX1.1</i>    | pyridoxine biosynthesis 1.1                                                                     | 3.2 | 2.4E-12 | 1.9E-10 | 1.2  | 1.3E-01 | 4.5E-01 |
| AT3G18485 | <i>ILR2</i>      | iaa-leucine resistant 2                                                                         | 3.2 | 1.2E-05 | 1.1E-04 | -1.2 | 4.9E-01 | 7.8E-01 |
| AT3G15830 | <i>AT3G15830</i> | phosphatidic acid phosphatase-related / PAP2-like protein                                       | 3.2 | 1.1E-02 | 3.4E-02 | 3.3  | 3.3E-03 | 7.2E-02 |
| AT3G18217 | <i>MIR157C</i>   |                                                                                                 | 3.2 | 6.0E-04 | 3.2E-03 | -1.4 | 3.0E-01 | 6.5E-01 |
| AT4G19820 | <i>AT4G19820</i> | Glycosyl hydrolase family protein with chitinase insertion domain-containing protein            | 3.2 | 9.3E-09 | 2.5E-07 | 1.2  | 2.8E-01 | 6.3E-01 |
| AT4G00050 | <i>UNE10</i>     | basic helix-loop-helix (bHLH) DNA-binding superfamily protein                                   | 3.2 | 2.1E-17 | 8.0E-15 | 1.1  | 7.7E-02 | 3.5E-01 |
| AT3G46480 | <i>AT3G46480</i> | 2-oxoglutarate (2OG) and Fe(II)-dependent oxygenase superfamily protein                         | 3.2 | 3.5E-04 | 2.0E-03 | 1.3  | 5.0E-01 | 7.9E-01 |
| AT3G52130 | <i>AT3G52130</i> | Bifunctional inhibitor/lipid-transfer protein/seed storage 2S albumin superfamily protein       | 3.2 | 7.6E-03 | 2.6E-02 | -1.0 | 9.9E-01 | 1.0E+00 |
| AT1G70580 | <i>AOAT2</i>     | alanine-2-oxoglutarate aminotransferase 2                                                       | 3.2 | 2.7E-13 | 2.9E-11 | 1.5  | 3.8E-04 | 2.0E-02 |
| AT3G48310 | <i>CYP71A22</i>  | cytochrome P450, family 71, subfamily A, polypeptide 22                                         | 3.2 | 9.5E-06 | 9.6E-05 | 1.8  | 3.1E-02 | 2.3E-01 |
| AT2G23590 | <i>MES8</i>      | methyl esterase 8                                                                               | 3.2 | 1.4E-07 | 2.5E-06 | 1.7  | 9.3E-03 | 1.2E-01 |
| AT3G55110 | <i>ABCG18</i>    | ABC-2 type transporter family protein                                                           | 3.2 | 1.3E-05 | 1.3E-04 | 1.6  | 6.0E-02 | 3.2E-01 |
| AT2G33250 | <i>AT2G33250</i> | transmembrane protein                                                                           | 3.2 | 7.9E-13 | 7.4E-11 | 1.1  | 5.0E-01 | 7.8E-01 |
| AT1G70820 | <i>AT1G70820</i> | phosphoglucomutase, putative / glucose phosphomutase                                            | 3.2 | 2.8E-06 | 3.5E-05 | 1.8  | 7.4E-03 | 1.1E-01 |
| AT4G08870 | <i>ARGAH2</i>    | Arginase/deacetylase superfamily protein                                                        | 3.2 | 9.5E-10 | 3.5E-08 | 1.4  | 2.5E-02 | 2.0E-01 |
| AT2G48150 | <i>GPX4</i>      | glutathione peroxidase 4                                                                        | 3.2 | 9.4E-03 | 3.1E-02 | 1.1  | 8.9E-01 | 9.7E-01 |
| AT3G22235 | <i>AT3G22235</i> | cysteine-rich TM module stress tolerance protein                                                | 3.2 | 2.6E-03 | 1.1E-02 | 1.4  | 3.3E-01 | 6.7E-01 |
| AT2G39730 | <i>RCA</i>       | rubisco activase                                                                                | 3.1 | 5.7E-10 | 2.2E-08 | 1.7  | 4.9E-04 | 2.4E-02 |
| AT1G79600 | <i>AT1G79600</i> | Protein kinase superfamily protein                                                              | 3.1 | 3.8E-16 | 9.7E-14 | 1.4  | 4.4E-04 | 2.2E-02 |
| AT5G46800 | <i>BOU</i>       | Mitochondrial substrate carrier family protein                                                  | 3.1 | 4.6E-14 | 5.9E-12 | 1.3  | 7.0E-03 | 1.1E-01 |
| AT5G08710 | <i>RUG1</i>      | Regulator of chromosome condensation (RCC1) family protein                                      | 3.1 | 2.3E-16 | 6.3E-14 | 1.1  | 4.9E-01 | 7.8E-01 |
| AT3G22830 | <i>HSFA6B</i>    | heat shock transcription factor A6B                                                             | 3.1 | 1.3E-07 | 2.4E-06 | 1.1  | 5.1E-01 | 8.0E-01 |
| AT4G23170 | <i>EP1</i>       | receptor-like protein kinase-related family protein                                             | 3.1 | 7.2E-03 | 2.5E-02 | 1.6  | 3.2E-01 | 6.6E-01 |
| AT4G16750 | <i>AT4G16750</i> | Integrase-type DNA-binding superfamily protein                                                  | 3.1 | 7.4E-09 | 2.1E-07 | 1.2  | 1.9E-01 | 5.3E-01 |
| AT1G06430 | <i>FTSH8</i>     | FTSH protease 8                                                                                 | 3.1 | 5.9E-13 | 5.7E-11 | 1.3  | 2.0E-02 | 1.8E-01 |
| AT1G65620 | <i>AS2</i>       | Lateral organ boundaries (LOB) domain family protein                                            | 3.1 | 2.0E-05 | 1.8E-04 | 1.1  | 5.6E-01 | 8.3E-01 |
| AT3G03780 | <i>MS2</i>       | methionine synthase 2                                                                           | 3.1 | 9.4E-16 | 2.1E-13 | 1.2  | 3.5E-02 | 2.4E-01 |
| AT5G67030 | <i>ABA1</i>      | zeaxanthin epoxidase (ZEP) (ABA1)                                                               | 3.1 | 2.8E-10 | 1.2E-08 | 1.5  | 3.7E-03 | 7.7E-02 |
| AT3G21690 | <i>AT3G21690</i> | MATE efflux family protein                                                                      | 3.1 | 7.9E-14 | 9.6E-12 | 1.2  | 1.1E-01 | 4.2E-01 |
| AT3G17609 | <i>HYH</i>       | HY5-homolog                                                                                     | 3.1 | 2.4E-09 | 7.7E-08 | 1.3  | 9.8E-02 | 4.0E-01 |
| AT4G35250 | <i>HCF244</i>    | NAD(P)-binding Rossmann-fold superfamily protein                                                | 3.1 | 1.2E-11 | 7.8E-10 | 1.5  | 9.5E-04 | 3.6E-02 |
| AT1G44575 | <i>NPQ4</i>      | Chlorophyll A-B binding family protein                                                          | 3.1 | 6.6E-13 | 6.2E-11 | 1.4  | 2.1E-03 | 5.7E-02 |
| AT2G17270 | <i>PHT3</i>      |                                                                                                 | 3.1 | 6.6E-13 | 6.2E-11 | 1.0  | 7.7E-01 | 9.3E-01 |
| AT1G31800 | <i>CYP97A3</i>   | cytochrome P450, family 97, subfamily A, polypeptide 3                                          | 3.1 | 3.2E-09 | 1.0E-07 | 1.6  | 2.9E-03 | 6.9E-02 |
| AT4G12917 | <i>AT4G12917</i> |                                                                                                 | 3.1 | 1.1E-03 | 5.3E-03 | 1.2  | 6.3E-01 | 8.6E-01 |
| AT1G69523 | <i>AT1G69523</i> | S-adenosyl-L-methionine-dependent methyltransferases superfamily protein                        | 3.1 | 2.5E-08 | 5.9E-07 | 1.5  | 1.7E-02 | 1.7E-01 |
| AT1G32220 | <i>AT1G32220</i> | NAD(P)-binding Rossmann-fold superfamily protein                                                | 3.1 | 3.7E-12 | 2.8E-10 | 1.3  | 3.4E-02 | 2.4E-01 |
| AT1G18060 | <i>AT1G18060</i> | microbial collagenase                                                                           | 3.1 | 2.6E-12 | 2.1E-10 | 1.4  | 2.3E-03 | 5.9E-02 |

|           |                   |                                                                                              |     |         |         |      |         |         |
|-----------|-------------------|----------------------------------------------------------------------------------------------|-----|---------|---------|------|---------|---------|
| AT3G47430 | <i>PEX11B</i>     | peroxin 11B                                                                                  | 3.1 | 2.7E-12 | 2.1E-10 | 1.4  | 1.5E-03 | 4.7E-02 |
| AT1G49405 | <i>AT1G49405</i>  | Uncharacterized protein family (UPF0497)                                                     | 3.0 | 1.4E-03 | 6.4E-03 | 1.3  | 4.3E-01 | 7.4E-01 |
| AT3G49320 | <i>AT3G49320</i>  | Metal-dependent protein hydrolase                                                            | 3.0 | 3.0E-08 | 6.8E-07 | 1.2  | 3.5E-01 | 6.9E-01 |
| AT4G33666 | <i>AT4G33666</i>  | hypothetical protein                                                                         | 3.0 | 4.2E-09 | 1.3E-07 | 1.4  | 3.1E-02 | 2.3E-01 |
| AT2G25450 | <i>AT2G25450</i>  | 2-oxoglutarate (2OG) and Fe(II)-dependent oxygenase superfamily protein                      | 3.0 | 2.8E-11 | 1.6E-09 | 1.6  | 1.1E-04 | 9.1E-03 |
| AT3G58150 | <i>AT3G58150</i>  | Optic atrophy 3 protein (OPA3)                                                               | 3.0 | 4.1E-03 | 1.6E-02 | 1.1  | 8.5E-01 | 9.5E-01 |
| AT1G76110 | <i>AT1G76110</i>  | HMG (high mobility group) box protein with ARID/BRIGHT DNA-binding domain-containing protein | 3.0 | 1.1E-09 | 4.1E-08 | 1.1  | 3.4E-01 | 6.8E-01 |
| AT2G35700 | <i>ERF38</i>      | ERF family protein 38                                                                        | 3.0 | 8.6E-04 | 4.3E-03 | -1.8 | 6.3E-02 | 3.2E-01 |
| AT5G16350 | <i>AT5G16350</i>  | O-acyltransferase (WSD1-like) family protein                                                 | 3.0 | 1.3E-06 | 1.8E-05 | -1.1 | 5.7E-01 | 8.3E-01 |
| AT3G57520 | <i>SIP2</i>       | seed imbibition 2                                                                            | 3.0 | 1.8E-09 | 6.1E-08 | 1.0  | 9.0E-01 | 9.8E-01 |
| AT3G13061 | <i>AT3G13061</i>  | Natural antisense transcript overlaps with AT3G13060                                         | 3.0 | 1.8E-08 | 4.4E-07 | 1.0  | 8.5E-01 | 9.5E-01 |
| AT5G59820 | <i>RHL41</i>      | C2H2-type zinc finger family protein                                                         | 3.0 | 1.1E-06 | 1.5E-05 | 1.2  | 3.0E-01 | 6.5E-01 |
| AT2G34060 | <i>AT2G34060</i>  | Peroxidase superfamily protein                                                               | 3.0 | 6.2E-10 | 2.4E-08 | 1.4  | 1.6E-02 | 1.6E-01 |
| AT1G78600 | <i>LZF1</i>       | light-regulated zinc finger protein 1                                                        | 3.0 | 8.8E-13 | 8.0E-11 | 1.2  | 3.1E-02 | 2.3E-01 |
| AT1G29700 | <i>AT1G29700</i>  | Metallo-hydrolase/oxidoreductase superfamily protein                                         | 3.0 | 6.2E-10 | 2.4E-08 | 1.5  | 3.4E-03 | 7.3E-02 |
| AT2G27820 | <i>PD1</i>        | prephenate dehydratase 1                                                                     | 3.0 | 3.3E-19 | 1.8E-16 | 1.1  | 2.6E-02 | 2.1E-01 |
| AT2G40100 | <i>LHCB4.3</i>    | light harvesting complex photosystem II                                                      | 3.0 | 6.5E-12 | 4.5E-10 | 1.5  | 3.4E-04 | 1.9E-02 |
| AT2G21280 | <i>SULA</i>       | NAD(P)-binding Rossmann-fold superfamily protein                                             | 3.0 | 1.1E-12 | 1.0E-10 | 1.5  | 3.2E-04 | 1.8E-02 |
| AT1G69310 | <i>WRKY57</i>     | WRKY DNA-binding protein 57                                                                  | 3.0 | 7.1E-15 | 1.2E-12 | 1.2  | 1.3E-02 | 1.5E-01 |
| AT4G37930 | <i>SHM1</i>       | serine transhydroxymethyltransferase 1                                                       | 3.0 | 1.9E-10 | 8.7E-09 | 1.6  | 3.9E-04 | 2.0E-02 |
| AT1G22690 | <i>AT1G22690</i>  | Gibberellin-regulated family protein                                                         | 3.0 | 8.0E-06 | 8.3E-05 | -1.0 | 8.3E-01 | 9.5E-01 |
| AT5G10470 | <i>KAC1</i>       | kinesin like protein for actin based chloroplast movement 1                                  | 3.0 | 2.7E-13 | 2.9E-11 | 1.3  | 2.8E-03 | 6.7E-02 |
| AT4G18810 | <i>AT4G18810</i>  | NAD(P)-binding Rossmann-fold superfamily protein                                             | 3.0 | 1.9E-09 | 6.5E-08 | 1.6  | 1.4E-03 | 4.4E-02 |
| AT3G47780 | <i>ABCA7</i>      | ABC2 homolog 6                                                                               | 3.0 | 1.1E-14 | 1.7E-12 | 1.8  | 6.5E-08 | 3.8E-05 |
| AT2G38380 | <i>AT2G38380</i>  | Peroxidase superfamily protein                                                               | 3.0 | 2.6E-06 | 3.2E-05 | 1.6  | 2.0E-02 | 1.9E-01 |
| AT1G21140 | <i>AT1G21140</i>  | Vacuolar iron transporter (VIT) family protein                                               | 3.0 | 4.2E-04 | 2.4E-03 | 1.7  | 6.5E-02 | 3.3E-01 |
| AT3G48320 | <i>CYP71A21</i>   | cytochrome P450, family 71, subfamily A, polypeptide 21                                      | 3.0 | 4.6E-07 | 7.2E-06 | 1.8  | 4.3E-03 | 8.3E-02 |
| AT3G22370 | <i>AOX1A</i>      | alternative oxidase 1A                                                                       | 3.0 | 1.3E-11 | 8.3E-10 | 1.8  | 2.5E-06 | 5.8E-04 |
| AT3G01990 | <i>ACR6</i>       | ACT domain repeat 6                                                                          | 3.0 | 3.0E-08 | 6.8E-07 | 1.4  | 2.3E-02 | 2.0E-01 |
| AT4G15248 | <i>BBX30</i>      | B-box type zinc finger family protein                                                        | 3.0 | 4.7E-05 | 3.7E-04 | -1.1 | 7.5E-01 | 9.1E-01 |
| AT1G66840 | <i>PMI2</i>       | PLASTID MOVEMENT IMPAIRED protein (DUF827)                                                   | 2.9 | 5.1E-12 | 3.7E-10 | 1.3  | 3.0E-02 | 2.3E-01 |
| AT2G34180 | <i>CIPK13</i>     | CBL-interacting protein kinase 13                                                            | 2.9 | 1.1E-04 | 7.4E-04 | 1.0  | 9.0E-01 | 9.8E-01 |
| AT2G18328 | <i>RL4</i>        | RAD-like 4                                                                                   | 2.9 | 1.1E-04 | 7.9E-04 | -1.1 | 7.5E-01 | 9.2E-01 |
| AT1G73990 | <i>SPPA</i>       | signal peptide peptidase                                                                     | 2.9 | 1.5E-16 | 4.5E-14 | 1.1  | 1.6E-01 | 5.0E-01 |
| AT2G32390 | <i>GLR3.5</i>     | glutamate receptor 3.5                                                                       | 2.9 | 3.3E-11 | 1.9E-09 | 1.1  | 3.9E-01 | 7.1E-01 |
| AT5G41740 | <i>AT5G41740</i>  | Disease resistance protein (TIR-NBS-LRR class) family                                        | 2.9 | 8.3E-06 | 8.6E-05 | 1.1  | 8.1E-01 | 9.4E-01 |
| AT5G36925 | <i>AT5G36925</i>  | hypothetical protein                                                                         | 2.9 | 2.3E-03 | 9.7E-03 | 1.4  | 3.6E-01 | 6.9E-01 |
| AT1G12250 | <i>AT1G12250</i>  | Pentapeptide repeat-containing protein                                                       | 2.9 | 5.5E-12 | 3.9E-10 | 1.3  | 2.7E-02 | 2.1E-01 |
| AT2G41000 | <i>AT2G41000</i>  | Chaperone DnaJ-domain superfamily protein                                                    | 2.9 | 1.2E-14 | 1.8E-12 | 1.2  | 7.7E-02 | 3.5E-01 |
| AT3G50560 | <i>AT3G50560</i>  | NAD(P)-binding Rossmann-fold superfamily protein                                             | 2.9 | 5.6E-10 | 2.2E-08 | -1.3 | 5.1E-02 | 2.9E-01 |
| AT5G18670 | <i>BMY3</i>       | beta-amylase 3                                                                               | 2.9 | 3.1E-14 | 4.1E-12 | 1.2  | 1.7E-02 | 1.7E-01 |
| AT4G23450 | <i>AIRP1</i>      | RING/U-box superfamily protein                                                               | 2.9 | 4.0E-08 | 8.7E-07 | 1.0  | 9.5E-01 | 9.9E-01 |
| AT4G18220 | <i>AT4G18220</i>  | Drug/metabolite transporter superfamily protein                                              | 2.9 | 2.2E-07 | 3.8E-06 | -1.0 | 8.9E-01 | 9.7E-01 |
| AT1G54575 | <i>AT1G54575</i>  | hypothetical protein                                                                         | 2.9 | 1.2E-06 | 1.6E-05 | 1.4  | 8.5E-02 | 3.7E-01 |
| AT1G65860 | <i>FMO GS-OX1</i> | flavin-monooxygenase glucosinolate S-oxygenase 1                                             | 2.9 | 3.4E-04 | 2.0E-03 | -1.1 | 8.1E-01 | 9.4E-01 |
| AT3G26570 | <i>PHT2</i>       |                                                                                              | 2.9 | 3.8E-12 | 2.8E-10 | 1.4  | 3.7E-03 | 7.6E-02 |
| AT5G35970 | <i>AT5G35970</i>  | P-loop containing nucleoside triphosphate hydrolases superfamily protein                     | 2.9 | 3.8E-09 | 1.2E-07 | 1.3  | 8.8E-02 | 3.8E-01 |
| AT4G15630 | <i>AT4G15630</i>  | Uncharacterized protein family (UPF0497)                                                     | 2.9 | 1.6E-07 | 2.9E-06 | -1.2 | 3.3E-01 | 6.7E-01 |
| AT3G26320 | <i>CYP71B36</i>   | cytochrome P450, family 71, subfamily B, polypeptide 36                                      | 2.9 | 3.9E-04 | 2.2E-03 | 1.7  | 1.2E-01 | 4.3E-01 |
| AT1G78990 | <i>AT1G78990</i>  | HXXXD-type acyl-transferase family protein                                                   | 2.9 | 3.2E-03 | 1.3E-02 | 2.7  | 4.5E-03 | 8.5E-02 |
| AT2G32500 | <i>AT2G32500</i>  | Stress responsive alpha-beta barrel domain protein                                           | 2.9 | 1.2E-09 | 4.3E-08 | 1.3  | 6.1E-02 | 3.2E-01 |
| AT3G47580 | <i>AT3G47580</i>  | Leucine-rich repeat protein kinase family protein                                            | 2.9 | 5.3E-08 | 1.1E-06 | -1.0 | 9.3E-01 | 9.8E-01 |
| AT5G10250 | <i>DOT3</i>       | Phototropic-responsive NPH3 family protein                                                   | 2.9 | 2.2E-04 | 1.4E-03 | 1.2  | 4.4E-01 | 7.5E-01 |
| AT3G24170 | <i>GR1</i>        | glutathione-disulfide reductase                                                              | 2.9 | 7.1E-19 | 3.7E-16 | 1.6  | 3.6E-09 | 4.1E-06 |
| AT5G41460 | <i>AT5G41460</i>  | transferring glycosyl group transferase (DUF604)                                             | 2.9 | 3.6E-07 | 5.8E-06 | 1.7  | 4.4E-03 | 8.4E-02 |
| AT3G57920 | <i>SPL15</i>      | squamosa promoter binding protein-like 15                                                    | 2.9 | 1.8E-08 | 4.4E-07 | 1.2  | 2.7E-01 | 6.2E-01 |
| AT2G19650 | <i>AT2G19650</i>  | Cysteine/Histidine-rich C1 domain family protein                                             | 2.9 | 5.6E-11 | 3.0E-09 | 1.4  | 3.0E-03 | 7.0E-02 |
| AT2G47200 | <i>AT2G47200</i>  | hypothetical protein                                                                         | 2.9 | 6.1E-03 | 2.2E-02 | 1.8  | 1.1E-01 | 4.2E-01 |
| AT4G28740 | <i>AT4G28740</i>  | LOW PSII ACCUMULATION-like protein                                                           | 2.9 | 2.5E-13 | 2.7E-11 | 1.4  | 1.1E-03 | 3.9E-02 |
| AT2G48130 | <i>AT2G48130</i>  | Bifunctional inhibitor/lipid-transfer protein/seed storage 2S albumin superfamily protein    | 2.8 | 6.7E-07 | 1.0E-05 | 1.8  | 1.2E-03 | 4.2E-02 |
| AT3G46370 | <i>AT3G46370</i>  | Leucine-rich repeat protein kinase family protein                                            | 2.8 | 4.5E-03 | 1.7E-02 | -2.0 | 8.3E-02 | 3.7E-01 |
| AT2G04795 | <i>AT2G04795</i>  | hypothetical protein                                                                         | 2.8 | 2.4E-05 | 2.1E-04 | 1.3  | 3.3E-01 | 6.7E-01 |
| AT5G38420 | <i>RBCS2B</i>     | Ribulose bisphosphate carboxylase (small chain) family protein                               | 2.8 | 3.2E-08 | 7.2E-07 | 1.7  | 9.7E-04 | 3.6E-02 |
| AT4G19170 | <i>NCED4</i>      | nine-cis-epoxycarotenoid dioxygenase 4                                                       | 2.8 | 4.1E-05 | 3.4E-04 | 1.0  | 9.9E-01 | 1.0E+00 |
| AT1G21120 | <i>IGMT2</i>      | O-methyltransferase family protein                                                           | 2.8 | 1.3E-05 | 1.2E-04 | 1.6  | 2.9E-02 | 2.2E-01 |
| AT1G55480 | <i>ZKT</i>        | protein containing PDZ domain, a K-box domain, and a TPR region                              | 2.8 | 1.5E-10 | 7.3E-09 | 1.5  | 1.1E-03 | 4.0E-02 |
| AT3G05936 | <i>AT3G05936</i>  | hypothetical protein                                                                         | 2.8 | 1.7E-06 | 2.2E-05 | 1.1  | 4.5E-01 | 7.6E-01 |
| AT2G34460 | <i>AT2G34460</i>  | NAD(P)-binding Rossmann-fold superfamily protein                                             | 2.8 | 1.7E-12 | 1.5E-10 | 1.4  | 2.7E-03 | 6.6E-02 |
| AT2G16895 | <i>AT2G16895</i>  | pseudogene of UDP-Glycosyltransferase superfamily protein                                    | 2.8 | 8.3E-03 | 2.8E-02 | -1.0 | 9.8E-01 | 1.0E+00 |



|           |                 |                                                                          |     |         |         |      |         |         |
|-----------|-----------------|--------------------------------------------------------------------------|-----|---------|---------|------|---------|---------|
| AT5G63060 | AT5G63060       | Sec14p-like phosphatidylinositol transfer family protein                 | 2.8 | 1.5E-06 | 1.9E-05 | 1.2  | 2.9E-01 | 6.3E-01 |
| AT1G14150 | <i>PnsL2</i>    | PsbQ-like 2                                                              | 2.8 | 2.2E-09 | 7.2E-08 | 1.6  | 7.6E-04 | 3.2E-02 |
| AT5G07020 | AT5G07020       | proline-rich family protein                                              | 2.8 | 3.3E-12 | 2.5E-10 | 1.4  | 2.9E-03 | 6.8E-02 |
| AT1G79770 | AT1G79770       | CASP-like protein (DUF1677)                                              | 2.8 | 6.1E-07 | 9.2E-06 | 1.0  | 8.4E-01 | 9.5E-01 |
| AT3G04140 | AT3G04140       | Ankyrin repeat family protein                                            | 2.8 | 2.9E-12 | 2.3E-10 | 1.1  | 4.4E-01 | 7.5E-01 |
| AT2G38780 | AT2G38780       | cytochrome C oxidase subunit                                             | 2.8 | 1.4E-13 | 1.6E-11 | 1.2  | 1.6E-02 | 1.7E-01 |
| AT5G62140 | AT5G62140       | ATP-dependent Clp protease ATP-binding subunit                           | 2.8 | 1.2E-11 | 7.5E-10 | 1.3  | 1.7E-02 | 1.7E-01 |
| AT1G35290 | AT1G35290       | Thioesterase superfamily protein                                         | 2.8 | 8.8E-05 | 6.4E-04 | 1.5  | 1.1E-01 | 4.2E-01 |
| AT5G26820 | <i>IREG3</i>    | iron-regulated protein 3                                                 | 2.8 | 3.1E-11 | 1.8E-09 | 1.0  | 7.2E-01 | 9.0E-01 |
| AT3G21510 | <i>AHP1</i>     | histidine-containing phosphotransmitter 1                                | 2.8 | 4.8E-07 | 7.5E-06 | 1.6  | 8.2E-03 | 1.2E-01 |
| AT5G56840 | AT5G56840       | myb-like transcription factor family protein                             | 2.8 | 5.6E-03 | 2.0E-02 | 1.9  | 5.5E-02 | 3.0E-01 |
| AT2G31790 | AT2G31790       | UDP-Glycosyltransferase superfamily protein                              | 2.8 | 4.4E-11 | 2.4E-09 | 1.3  | 2.8E-02 | 2.2E-01 |
| AT1G52870 | AT1G52870       | Peroxisomal membrane 22 kDa (Mpv17/PMP22) family protein                 | 2.8 | 9.4E-10 | 3.5E-08 | 1.2  | 1.3E-01 | 4.5E-01 |
| AT1G62250 | AT1G62250       | orotidine 5'-phosphate decarboxylase                                     | 2.8 | 1.5E-12 | 1.3E-10 | 1.3  | 4.4E-03 | 8.4E-02 |
| AT5G59130 | AT5G59130       | Subtilase family protein                                                 | 2.8 | 1.2E-12 | 1.1E-10 | 1.5  | 2.8E-04 | 1.7E-02 |
| AT3G48420 | AT3G48420       | Haloacid dehalogenase-like hydrolase (HAD) superfamily protein           | 2.8 | 5.3E-09 | 1.6E-07 | 1.6  | 1.2E-03 | 4.0E-02 |
| AT5G52420 | AT5G52420       | transmembrane protein                                                    | 2.8 | 2.3E-13 | 2.6E-11 | 1.3  | 3.7E-03 | 7.6E-02 |
| AT3G46650 | AT3G46650       | UDP-Glycosyltransferase superfamily protein                              | 2.8 | 3.6E-05 | 3.0E-04 | 2.1  | 2.6E-03 | 6.4E-02 |
| AT5G65840 | AT5G65840       | Thioredoxin superfamily protein                                          | 2.8 | 5.4E-16 | 1.3E-13 | 1.3  | 1.7E-03 | 5.0E-02 |
| AT4G18210 | <i>PUP10</i>    | purine permease 10                                                       | 2.8 | 6.9E-08 | 1.4E-06 | -1.2 | 3.7E-01 | 7.1E-01 |
| AT1G62750 | <i>SCO1</i>     | Translation elongation factor EFG/EF2 protein                            | 2.8 | 2.0E-11 | 1.2E-09 | 1.3  | 7.8E-03 | 1.1E-01 |
| AT2G15080 | <i>RLP19</i>    | receptor like protein 19                                                 | 2.8 | 1.8E-04 | 1.2E-03 | -1.0 | 8.8E-01 | 9.7E-01 |
| AT1G68240 | AT1G68240       | basic helix-loop-helix (bHLH) DNA-binding superfamily protein            | 2.8 | 1.3E-02 | 4.1E-02 | 2.4  | 6.9E-02 | 3.4E-01 |
| AT5G38510 | AT5G38510       | Rhomboid-related intramembrane serine protease family protein            | 2.8 | 9.8E-11 | 4.9E-09 | 1.4  | 4.3E-03 | 8.3E-02 |
| AT3G28840 | AT3G28840       | hypothetical protein (DUF1216)                                           | 2.8 | 1.1E-02 | 3.4E-02 | -1.8 | 2.0E-01 | 5.5E-01 |
| AT3G01500 | <i>CA1</i>      | carbonic anhydrase 1                                                     | 2.8 | 4.8E-08 | 1.0E-06 | 1.8  | 3.7E-04 | 2.0E-02 |
| AT3G19450 | <i>ATCAD4</i>   | GroES-like zinc-binding alcohol dehydrogenase family protein             | 2.8 | 5.8E-13 | 5.6E-11 | 1.2  | 8.2E-02 | 3.6E-01 |
| AT3G15850 | <i>FAD5</i>     | fatty acid desaturase 5                                                  | 2.8 | 6.7E-09 | 1.9E-07 | 1.2  | 2.9E-01 | 6.3E-01 |
| AT4G35090 | <i>CAT2</i>     | catalase 2                                                               | 2.8 | 2.0E-13 | 2.3E-11 | 1.3  | 1.0E-02 | 1.3E-01 |
| AT2G30490 | <i>C4H</i>      | cinnamate-4-hydroxylase                                                  | 2.8 | 8.4E-16 | 1.9E-13 | 1.1  | 8.1E-02 | 3.6E-01 |
| AT1G01250 | AT1G01250       | Integrase-type DNA-binding superfamily protein                           | 2.8 | 4.2E-03 | 1.6E-02 | -1.2 | 6.4E-01 | 8.7E-01 |
| AT2G47270 | <i>UPB1</i>     | transcription factor UPBEAT protein                                      | 2.8 | 1.0E-07 | 1.9E-06 | 1.5  | 8.6E-03 | 1.2E-01 |
| AT5G08760 | AT5G08760       | transmembrane protein                                                    | 2.8 | 4.1E-04 | 2.3E-03 | 1.5  | 1.8E-01 | 5.2E-01 |
| AT2G35960 | <i>NHL12</i>    | NDR1/HIN1-like 12                                                        | 2.8 | 1.1E-08 | 2.9E-07 | 1.8  | 1.6E-04 | 1.1E-02 |
| AT4G29930 | AT4G29930       | basic helix-loop-helix (bHLH) DNA-binding superfamily protein            | 2.8 | 8.8E-05 | 6.3E-04 | 1.7  | 1.8E-02 | 1.7E-01 |
| AT4G34138 | <i>UGT73B1</i>  | UDP-glucosyl transferase 73B1                                            | 2.8 | 3.1E-12 | 2.4E-10 | 1.9  | 2.0E-07 | 8.7E-05 |
| AT1G70985 | AT1G70985       | hydroxyproline-rich glycoprotein family protein                          | 2.7 | 2.7E-08 | 6.3E-07 | 1.1  | 4.4E-01 | 7.5E-01 |
| AT1G78140 | AT1G78140       | S-adenosyl-L-methionine-dependent methyltransferases superfamily protein | 2.7 | 3.9E-17 | 1.3E-14 | 1.1  | 8.8E-02 | 3.8E-01 |
| AT4G34060 | <i>DML3</i>     | demeter-like protein 3                                                   | 2.7 | 2.8E-04 | 1.7E-03 | 1.4  | 1.7E-01 | 5.2E-01 |
| AT1G50250 | <i>FTSH1</i>    | FTSH protease 1                                                          | 2.7 | 4.6E-12 | 3.3E-10 | 1.4  | 3.3E-03 | 7.3E-02 |
| AT3G22210 | AT3G22210       | transmembrane protein                                                    | 2.7 | 2.1E-07 | 3.7E-06 | 1.4  | 5.6E-02 | 3.0E-01 |
| AT1G02220 | <i>NAC003</i>   | NAC domain containing protein 3                                          | 2.7 | 3.7E-08 | 8.2E-07 | 1.6  | 2.8E-03 | 6.7E-02 |
| AT3G23400 | <i>FIB4</i>     | Plastid-lipid associated protein PAP / fibrillin family protein          | 2.7 | 2.3E-15 | 4.4E-13 | 1.3  | 2.0E-03 | 5.6E-02 |
| AT3G14770 | <i>SWEET2</i>   | Nodulin MtN3 family protein                                              | 2.7 | 1.5E-05 | 1.4E-04 | 1.2  | 4.5E-01 | 7.6E-01 |
| AT2G31750 | <i>UGT74D1</i>  | UDP-glucosyl transferase 74D1                                            | 2.7 | 1.3E-19 | 8.1E-17 | 1.4  | 1.0E-07 | 5.3E-05 |
| AT4G38970 | <i>FBA2</i>     | fructose-bisphosphate aldolase 2                                         | 2.7 | 5.3E-10 | 2.1E-08 | 1.4  | 3.4E-03 | 7.3E-02 |
| AT2G29310 | AT2G29310       | NAD(P)-binding Rossmann-fold superfamily protein                         | 2.7 | 9.8E-09 | 2.6E-07 | 1.4  | 2.1E-02 | 1.9E-01 |
| AT3G46670 | <i>UGT76E11</i> | UDP-glucosyl transferase 76E11                                           | 2.7 | 9.4E-07 | 1.3E-05 | 1.9  | 5.6E-04 | 2.6E-02 |
| AT2G23840 | AT2G23840       | HNH endonuclease                                                         | 2.7 | 2.3E-07 | 3.9E-06 | 1.5  | 1.7E-02 | 1.7E-01 |
| AT1G72930 | <i>TIR</i>      | toll/interleukin-1 receptor-like protein                                 | 2.7 | 1.5E-04 | 1.0E-03 | 1.2  | 4.0E-01 | 7.3E-01 |
| AT4G15720 | AT4G15720       | Tetratricopeptide repeat (TPR)-like superfamily protein                  | 2.7 | 5.3E-03 | 2.0E-02 | 1.8  | 7.6E-02 | 3.5E-01 |
| AT2G37240 | AT2G37240       | Thioredoxin superfamily protein                                          | 2.7 | 7.5E-10 | 2.8E-08 | 1.3  | 6.4E-02 | 3.3E-01 |
| AT5G17170 | <i>ENH1</i>     | rubredoxin family protein                                                | 2.7 | 1.2E-11 | 7.7E-10 | 1.3  | 7.9E-03 | 1.1E-01 |
| AT4G15670 | AT4G15670       | Thioredoxin superfamily protein                                          | 2.7 | 3.8E-03 | 1.5E-02 | 1.8  | 1.5E-01 | 4.8E-01 |
| AT3G27110 | AT3G27110       | Peptidase family M48 family protein                                      | 2.7 | 4.2E-16 | 1.0E-13 | 1.0  | 5.6E-01 | 8.2E-01 |
| AT2G04790 | AT2G04790       | PTB domain engulfment adapter                                            | 2.7 | 5.4E-09 | 1.6E-07 | 1.4  | 2.3E-02 | 2.0E-01 |
| AT3G03630 | <i>CS26</i>     | cysteine synthase 26                                                     | 2.7 | 5.9E-09 | 1.7E-07 | 1.3  | 7.4E-02 | 3.5E-01 |
| AT3G22420 | <i>WNK2</i>     | with no lysine (K) kinase 2                                              | 2.7 | 5.4E-11 | 2.9E-09 | 1.2  | 7.2E-02 | 3.4E-01 |
| AT5G66760 | <i>SDH1-1</i>   | succinate dehydrogenase 1-1                                              | 2.7 | 2.0E-18 | 8.2E-16 | 1.3  | 3.3E-04 | 1.8E-02 |
| AT3G01970 | <i>WRKY45</i>   | WRKY DNA-binding protein 45                                              | 2.7 | 3.6E-07 | 5.8E-06 | 1.8  | 6.8E-04 | 2.9E-02 |
| AT5G38410 | <i>RBCS3B</i>   | Ribulose bisphosphate carboxylase (small chain) family protein           | 2.7 | 1.9E-08 | 4.5E-07 | 1.6  | 2.3E-03 | 5.9E-02 |
| AT4G23493 | AT4G23493       | hypothetical protein                                                     | 2.7 | 3.3E-06 | 3.9E-05 | 1.2  | 4.0E-01 | 7.2E-01 |
| AT1G34000 | <i>OHP2</i>     | one-helix protein 2                                                      | 2.7 | 2.9E-12 | 2.3E-10 | 1.2  | 3.2E-02 | 2.4E-01 |
| AT1G78476 | AT1G78476       | hypothetical protein                                                     | 2.7 | 1.4E-03 | 6.4E-03 | 1.5  | 2.0E-01 | 5.4E-01 |
| AT2G28105 | AT2G28105       | replication factor-A carboxy-terminal domain protein                     | 2.7 | 3.5E-06 | 4.1E-05 | -1.2 | 2.4E-01 | 5.9E-01 |
| AT5G44575 | AT5G44575       | hypothetical protein                                                     | 2.7 | 5.5E-03 | 2.0E-02 | 1.1  | 8.3E-01 | 9.5E-01 |
| AT1G08550 | <i>NPQ1</i>     | non-photochemical quenching 1                                            | 2.7 | 1.2E-11 | 7.8E-10 | 1.3  | 9.2E-03 | 1.2E-01 |
| AT1G15980 | <i>PnsB1</i>    | NDH-dependent cyclic electron flow 1                                     | 2.7 | 7.9E-09 | 2.2E-07 | 1.6  | 6.4E-04 | 2.8E-02 |
| AT1G23740 | <i>AOR</i>      | Oxidoreductase, zinc-binding dehydrogenase family protein                | 2.7 | 1.1E-10 | 5.2E-09 | 1.4  | 2.6E-03 | 6.5E-02 |

|           |                  |                                                                                |     |         |         |      |         |         |
|-----------|------------------|--------------------------------------------------------------------------------|-----|---------|---------|------|---------|---------|
| AT1G76080 | <i>CDSP32</i>    | chloroplastic drought-induced stress protein of 32 kD                          | 2.7 | 5.9E-12 | 4.1E-10 | 1.4  | 1.9E-03 | 5.4E-02 |
| AT2G41120 | <i>AT2G41120</i> | DUF309 domain protein                                                          | 2.7 | 8.7E-07 | 1.3E-05 | 1.4  | 7.5E-02 | 3.5E-01 |
| AT4G15563 | <i>AT4G15563</i> | F-box-like protein                                                             | 2.7 | 8.5E-08 | 1.7E-06 | -1.1 | 3.9E-01 | 7.2E-01 |
| AT5G19855 | <i>RbcX2</i>     | Chaperonin-like RbcX protein                                                   | 2.7 | 4.1E-12 | 3.0E-10 | 1.4  | 2.9E-03 | 6.8E-02 |
| AT1G47610 | <i>AT1G47610</i> | Transducin/WD40 repeat-like superfamily protein                                | 2.7 | 1.0E-02 | 3.4E-02 | 2.0  | 3.4E-02 | 2.4E-01 |
| AT1G74430 | <i>MYB95</i>     | myb domain protein 95                                                          | 2.7 | 5.7E-15 | 9.7E-13 | 1.5  | 4.5E-06 | 9.0E-04 |
| AT1G76800 | <i>AT1G76800</i> | Vacuolar iron transporter (VIT) family protein                                 | 2.7 | 5.8E-04 | 3.1E-03 | 1.2  | 4.8E-01 | 7.7E-01 |
| AT2G32510 | <i>MAPKKK17</i>  | mitogen-activated protein kinase kinase kinase 17                              | 2.7 | 1.8E-09 | 6.2E-08 | 1.1  | 2.9E-01 | 6.4E-01 |
| AT3G16175 | <i>AT3G16175</i> | Thioesterase superfamily protein                                               | 2.7 | 6.9E-07 | 1.0E-05 | 1.6  | 1.4E-02 | 1.5E-01 |
| AT3G47770 | <i>ABCA6</i>     | ABC2 homolog 5                                                                 | 2.7 | 9.7E-03 | 3.2E-02 | 1.9  | 9.0E-02 | 3.8E-01 |
| AT1G71810 | <i>AT1G71810</i> | Protein kinase superfamily protein                                             | 2.7 | 4.4E-11 | 2.4E-09 | 1.3  | 2.3E-02 | 2.0E-01 |
| AT5G08740 | <i>NDC1</i>      | NAD(P)H dehydrogenase C1                                                       | 2.7 | 4.7E-14 | 6.0E-12 | 1.2  | 1.7E-02 | 1.7E-01 |
| AT4G16690 | <i>MES16</i>     | methyl esterase 16                                                             | 2.7 | 2.1E-07 | 3.7E-06 | 1.3  | 5.4E-02 | 3.0E-01 |
| AT5G64120 | <i>AT5G64120</i> | Peroxidase superfamily protein                                                 | 2.7 | 1.5E-06 | 2.0E-05 | 1.9  | 4.5E-04 | 2.2E-02 |
| AT1G13930 | <i>AT1G13930</i> | oleosin-B3-like protein                                                        | 2.7 | 3.9E-10 | 1.6E-08 | 1.4  | 2.9E-03 | 6.8E-02 |
| AT3G20200 | <i>AT3G20200</i> | kinase with adenine nucleotide alpha hydrolases-like domain-containing protein | 2.7 | 3.3E-08 | 7.4E-07 | 1.1  | 3.6E-01 | 6.9E-01 |
| AT5G41170 | <i>AT5G41170</i> | Pentatricopeptide repeat (PPR-like) superfamily protein                        | 2.7 | 1.1E-06 | 1.5E-05 | 1.2  | 2.8E-01 | 6.3E-01 |
| AT5G17700 | <i>AT5G17700</i> | MATE efflux family protein                                                     | 2.7 | 5.6E-06 | 6.2E-05 | 1.2  | 4.0E-01 | 7.2E-01 |
| AT4G37610 | <i>BT5</i>       | BTB and TAZ domain protein 5                                                   | 2.7 | 5.1E-10 | 2.1E-08 | 1.2  | 1.5E-01 | 4.8E-01 |
| AT3G21890 | <i>BBX31</i>     | B-box type zinc finger family protein                                          | 2.6 | 2.2E-06 | 2.8E-05 | -1.2 | 2.5E-01 | 6.0E-01 |
| AT5G35110 | <i>AT5G35110</i> | hypothetical protein                                                           | 2.6 | 7.5E-04 | 3.8E-03 | 1.8  | 2.0E-02 | 1.8E-01 |
| AT3G55800 | <i>SBPASE</i>    | sedoheptulose-bisphosphatase                                                   | 2.6 | 5.0E-10 | 2.0E-08 | 1.6  | 1.8E-04 | 1.2E-02 |
| AT5G09230 | <i>SRT2</i>      | sirtuin 2                                                                      | 2.6 | 6.7E-15 | 1.1E-12 | 1.1  | 5.0E-01 | 7.9E-01 |
| AT1G74640 | <i>AT1G74640</i> | alpha/beta-Hydrolases superfamily protein                                      | 2.6 | 1.3E-15 | 2.7E-13 | 1.3  | 3.0E-04 | 1.7E-02 |
| AT1G69730 | <i>AT1G69730</i> | Wall-associated kinase family protein                                          | 2.6 | 8.1E-07 | 1.2E-05 | 1.4  | 3.8E-02 | 2.6E-01 |
| AT5G43260 | <i>AT5G43260</i> | chaperone protein dnaJ-like protein                                            | 2.6 | 6.2E-13 | 5.9E-11 | 1.2  | 4.5E-02 | 2.8E-01 |
| AT4G15700 | <i>AT4G15700</i> | Thioredoxin superfamily protein                                                | 2.6 | 4.2E-03 | 1.6E-02 | 1.9  | 8.2E-02 | 3.6E-01 |
| AT4G37560 | <i>AT4G37560</i> | Acetamidase/Formamidase family protein                                         | 2.6 | 7.7E-07 | 1.1E-05 | 1.6  | 9.6E-03 | 1.3E-01 |
| AT1G55020 | <i>LOX1</i>      | lipxygenase 1                                                                  | 2.6 | 2.6E-08 | 6.0E-07 | 1.2  | 1.5E-01 | 4.8E-01 |
| AT5G02180 | <i>AT5G02180</i> | Transmembrane amino acid transporter family protein                            | 2.6 | 2.0E-08 | 4.8E-07 | 1.4  | 1.9E-02 | 1.8E-01 |
| AT3G20440 | <i>EMB2729</i>   | Alpha amylase family protein                                                   | 2.6 | 1.9E-05 | 1.7E-04 | 1.6  | 2.1E-02 | 1.9E-01 |
| AT3G05790 | <i>LON4</i>      | lon protease 4                                                                 | 2.6 | 9.1E-03 | 3.0E-02 | -1.2 | 5.6E-01 | 8.3E-01 |
| AT5G58760 | <i>DDB2</i>      | damaged DNA binding 2                                                          | 2.6 | 1.3E-14 | 1.9E-12 | 1.3  | 2.0E-03 | 5.5E-02 |
| AT4G25290 | <i>AT4G25290</i> | DNA photolyase                                                                 | 2.6 | 1.8E-09 | 6.2E-08 | 1.6  | 3.8E-04 | 2.0E-02 |
| AT5G02120 | <i>OHP</i>       | one helix protein                                                              | 2.6 | 5.3E-11 | 2.9E-09 | 1.3  | 2.5E-02 | 2.1E-01 |
| AT2G01110 | <i>APG2</i>      | Sec-independent periplasmic protein translocase                                | 2.6 | 3.8E-13 | 3.8E-11 | 1.2  | 1.5E-02 | 1.6E-01 |
| AT2G35130 | <i>AT2G35130</i> | Tetratricopeptide repeat (TPR)-like superfamily protein                        | 2.6 | 2.9E-09 | 9.3E-08 | 1.4  | 9.5E-03 | 1.3E-01 |
| AT1G23200 | <i>AT1G23200</i> | Plant invertase/pectin methylesterase inhibitor superfamily                    | 2.6 | 4.2E-04 | 2.3E-03 | -1.5 | 1.5E-01 | 4.8E-01 |
| AT2G30950 | <i>VAR2</i>      | FtsH extracellular protease family                                             | 2.6 | 2.7E-11 | 1.6E-09 | 1.4  | 2.6E-03 | 6.4E-02 |
| AT4G17215 | <i>AT4G17215</i> | Pollen Ole e 1 allergen and extensin family protein                            | 2.6 | 3.2E-06 | 3.9E-05 | 1.7  | 2.8E-03 | 6.7E-02 |
| AT4G09350 | <i>NdhT</i>      | Chaperone DnaJ-domain superfamily protein                                      | 2.6 | 4.0E-08 | 8.6E-07 | 1.4  | 3.4E-02 | 2.4E-01 |
| AT4G37150 | <i>MES9</i>      | methyl esterase 9                                                              | 2.6 | 2.6E-11 | 1.5E-09 | 1.1  | 3.0E-01 | 6.5E-01 |
| AT2G34810 | <i>AT2G34810</i> | FAD-binding Berberine family protein                                           | 2.6 | 7.7E-07 | 1.1E-05 | 1.0  | 9.0E-01 | 9.7E-01 |
| AT3G10840 | <i>AT3G10840</i> | alpha/beta-Hydrolases superfamily protein                                      | 2.6 | 1.3E-08 | 3.2E-07 | 1.5  | 5.6E-03 | 9.7E-02 |
| AT1G22750 | <i>AT1G22750</i> | transmembrane protein                                                          | 2.6 | 1.2E-08 | 3.1E-07 | 1.2  | 1.2E-01 | 4.4E-01 |
| AT1G65240 | <i>AT1G65240</i> | Eukaryotic aspartyl protease family protein                                    | 2.6 | 6.6E-03 | 2.3E-02 | -1.2 | 5.2E-01 | 8.0E-01 |
| AT1G07250 | <i>UGT71C4</i>   | UDP-glucosyl transferase 71C4                                                  | 2.6 | 8.4E-16 | 1.9E-13 | 1.1  | 1.4E-01 | 4.7E-01 |
| AT3G48480 | <i>AT3G48480</i> | Cysteine proteinases superfamily protein                                       | 2.6 | 8.9E-07 | 1.3E-05 | -1.8 | 2.1E-03 | 5.7E-02 |
| AT1G53090 | <i>SPA4</i>      | SPA1-related 4                                                                 | 2.6 | 2.3E-13 | 2.6E-11 | 1.2  | 5.9E-02 | 3.1E-01 |
| AT2G21560 | <i>AT2G21560</i> | nucleolar-like protein                                                         | 2.6 | 3.8E-11 | 2.2E-09 | -1.0 | 6.8E-01 | 8.9E-01 |
| AT1G07128 | <i>AT1G07128</i> | Natural antisense transcript overlaps with AT1G07130                           | 2.6 | 1.6E-07 | 2.9E-06 | -1.1 | 6.1E-01 | 8.5E-01 |
| AT2G22240 | <i>MIPS2</i>     | myo-inositol-1-phosphate synthase 2                                            | 2.6 | 2.0E-10 | 8.9E-09 | -1.0 | 6.8E-01 | 8.8E-01 |
| AT5G04830 | <i>AT5G04830</i> | Nuclear transport factor 2 (NTF2) family protein                               | 2.6 | 2.4E-15 | 4.6E-13 | 1.1  | 1.8E-01 | 5.2E-01 |
| AT3G46870 | <i>AT3G46870</i> | Pentatricopeptide repeat (PPR) superfamily protein                             | 2.5 | 2.4E-08 | 5.6E-07 | 1.3  | 3.3E-02 | 2.4E-01 |
| AT1G29530 | <i>AT1G29530</i> | hypothetical protein                                                           | 2.5 | 6.1E-10 | 2.4E-08 | 1.5  | 1.8E-03 | 5.2E-02 |
| AT1G78440 | <i>ATGA20X1</i>  | gibberellin 2-beta-dioxygenase                                                 | 2.5 | 1.4E-03 | 6.6E-03 | -1.1 | 7.9E-01 | 9.3E-01 |
| AT1G66230 | <i>MYB20</i>     | myb domain protein 20                                                          | 2.5 | 2.3E-07 | 4.0E-06 | 1.0  | 7.5E-01 | 9.2E-01 |
| AT5G11590 | <i>TINY2</i>     | Integrase-type DNA-binding superfamily protein                                 | 2.5 | 7.4E-05 | 5.5E-04 | 1.1  | 8.2E-01 | 9.4E-01 |
| AT4G01080 | <i>TBL26</i>     | TRICHOME BIREFRINGENCE-LIKE 26                                                 | 2.5 | 1.1E-04 | 7.7E-04 | 1.1  | 5.7E-01 | 8.3E-01 |
| AT2G23010 | <i>SCPL9</i>     | serine carboxypeptidase-like 9                                                 | 2.5 | 1.4E-06 | 1.9E-05 | -1.2 | 3.6E-01 | 7.0E-01 |
| AT1G80300 | <i>NTT1</i>      | nucleotide transporter 1                                                       | 2.5 | 2.9E-14 | 3.9E-12 | -1.1 | 4.9E-01 | 7.8E-01 |
| AT2G34960 | <i>CAT5</i>      | cationic amino acid transporter 5                                              | 2.5 | 6.0E-05 | 4.6E-04 | 1.0  | 9.3E-01 | 9.8E-01 |
| AT3G61870 | <i>AT3G61870</i> | plant/protein                                                                  | 2.5 | 5.7E-11 | 3.1E-09 | 1.6  | 6.2E-05 | 5.9E-03 |
| AT3G04210 | <i>AT3G04210</i> | Disease resistance protein (TIR-NBS class)                                     | 2.5 | 6.6E-04 | 3.5E-03 | 1.2  | 5.3E-01 | 8.1E-01 |
| AT4G11570 | <i>AT4G11570</i> | Haloacid dehalogenase-like hydrolase (HAD) superfamily protein                 | 2.5 | 5.4E-12 | 3.8E-10 | 1.2  | 3.7E-02 | 2.5E-01 |
| AT3G50980 | <i>XERO1</i>     | dehydrin xero 1                                                                | 2.5 | 3.2E-04 | 1.9E-03 | 1.6  | 3.4E-02 | 2.4E-01 |
| AT1G72610 | <i>GER1</i>      | germin-like protein 1                                                          | 2.5 | 3.7E-07 | 6.0E-06 | 1.3  | 8.5E-02 | 3.7E-01 |
| AT2G33855 | <i>AT2G33855</i> | transmembrane protein                                                          | 2.5 | 4.6E-10 | 1.9E-08 | 1.2  | 6.2E-02 | 3.2E-01 |
| AT1G51110 | <i>AT1G51110</i> | Plastid-lipid associated protein PAP / fibrillin family protein                | 2.5 | 1.7E-06 | 2.2E-05 | 1.5  | 1.4E-02 | 1.5E-01 |
| AT1G74290 | <i>AT1G74290</i> | alpha/beta-Hydrolases superfamily protein                                      | 2.5 | 2.0E-03 | 8.7E-03 | 1.7  | 1.2E-01 | 4.4E-01 |
| AT3G27380 | <i>SDH2-1</i>    | succinate dehydrogenase 2-1                                                    | 2.5 | 6.0E-14 | 7.4E-12 | 1.1  | 1.9E-01 | 5.3E-01 |
| AT2G46420 | <i>AT2G46420</i> | helicase with zinc finger protein                                              | 2.5 | 4.1E-12 | 3.0E-10 | 1.2  | 1.9E-02 | 1.8E-01 |
| AT1G33110 | <i>AT1G33110</i> | MATE efflux family protein                                                     | 2.5 | 5.1E-08 | 1.1E-06 | 1.5  | 4.9E-03 | 8.9E-02 |

|           |                  |                                                                                                       |     |         |         |      |         |         |
|-----------|------------------|-------------------------------------------------------------------------------------------------------|-----|---------|---------|------|---------|---------|
| AT5G38430 | <i>RBCS1B</i>    | Ribulose bisphosphate carboxylase (small chain) family protein                                        | 2.5 | 3.0E-07 | 5.0E-06 | 1.6  | 2.0E-03 | 5.6E-02 |
| AT3G15090 | <i>AT3G15090</i> | GroES-like zinc-binding alcohol dehydrogenase family protein                                          | 2.5 | 1.3E-18 | 6.1E-16 | 1.3  | 5.8E-05 | 5.7E-03 |
| AT3G06145 | <i>AT3G06145</i> | RING zinc finger protein                                                                              | 2.5 | 4.4E-07 | 6.9E-06 | 1.1  | 4.3E-01 | 7.4E-01 |
| AT1G65230 | <i>AT1G65230</i> | transmembrane protein, putative (DUF2358)                                                             | 2.5 | 3.3E-09 | 1.0E-07 | 1.3  | 1.4E-02 | 1.5E-01 |
| AT4G26200 | <i>ACS7</i>      | 1-amino-cyclopropane-1-carboxylate synthase 7                                                         | 2.5 | 2.4E-04 | 1.5E-03 | 1.2  | 3.8E-01 | 7.1E-01 |
| AT4G29030 | <i>AT4G29030</i> | Putative membrane lipoprotein                                                                         | 2.5 | 1.5E-05 | 1.4E-04 | 1.3  | 1.7E-01 | 5.0E-01 |
| AT2G37770 | <i>ChIAKR</i>    | NAD(P)-linked oxidoreductase superfamily protein                                                      | 2.5 | 5.4E-03 | 2.0E-02 | 2.2  | 5.4E-03 | 9.5E-02 |
| AT1G22400 | <i>UGT85A1</i>   | UDP-Glycosyltransferase superfamily protein                                                           | 2.5 | 6.1E-08 | 1.3E-06 | 1.1  | 3.3E-01 | 6.7E-01 |
| AT4G38620 | <i>MYB4</i>      | myb domain protein 4                                                                                  | 2.5 | 7.4E-08 | 1.5E-06 | 1.3  | 4.1E-02 | 2.6E-01 |
| AT1G65130 | <i>AT1G65130</i> | Ubiquitin carboxyl-terminal hydrolase-related protein                                                 | 2.5 | 3.0E-03 | 1.2E-02 | 1.2  | 4.8E-01 | 7.7E-01 |
| AT5G11160 | <i>APT5</i>      | adenine phosphoribosyltransferase 5                                                                   | 2.5 | 4.0E-06 | 4.6E-05 | -1.0 | 9.3E-01 | 9.8E-01 |
| AT3G61880 | <i>CYP78A9</i>   | cytochrome p450 78a9                                                                                  | 2.5 | 7.3E-04 | 3.8E-03 | 1.9  | 2.7E-02 | 2.1E-01 |
| AT1G32440 | <i>PKp3</i>      | plastidial pyruvate kinase 3                                                                          | 2.5 | 9.4E-16 | 2.1E-13 | 1.3  | 2.2E-04 | 1.4E-02 |
| AT4G21760 | <i>BGLU47</i>    | beta-glucosidase 47                                                                                   | 2.5 | 1.2E-02 | 3.6E-02 | 1.3  | 4.6E-01 | 7.7E-01 |
| AT5G45680 | <i>FKBP13</i>    | FK506-binding protein 13                                                                              | 2.5 | 5.5E-09 | 1.6E-07 | 1.2  | 7.9E-02 | 3.6E-01 |
| AT2G48090 | <i>AT2G48090</i> | hypothetical protein                                                                                  | 2.5 | 9.3E-04 | 4.6E-03 | -1.4 | 2.5E-01 | 6.0E-01 |
| AT4G28290 | <i>AT4G28290</i> | hypothetical protein                                                                                  | 2.5 | 3.8E-11 | 2.1E-09 | 1.1  | 3.7E-01 | 7.0E-01 |
| AT1G10960 | <i>FD1</i>       | ferredoxin 1                                                                                          | 2.5 | 7.9E-09 | 2.2E-07 | 1.3  | 2.5E-02 | 2.1E-01 |
| AT3G57830 | <i>AT3G57830</i> | Leucine-rich repeat protein kinase family protein                                                     | 2.5 | 1.1E-09 | 4.1E-08 | 1.2  | 1.7E-01 | 5.1E-01 |
| AT5G64850 | <i>AT5G64850</i> | sorbin/SH3 domain protein                                                                             | 2.5 | 2.2E-11 | 1.3E-09 | -1.0 | 9.1E-01 | 9.8E-01 |
| AT1G32080 | <i>LrgB</i>      | membrane protein                                                                                      | 2.5 | 1.0E-07 | 1.9E-06 | 1.5  | 5.8E-03 | 9.8E-02 |
| AT2G04530 | <i>CPZ</i>       | Metallo-hydrolase/oxidoreductase superfamily protein                                                  | 2.5 | 1.5E-07 | 2.8E-06 | 1.1  | 5.7E-01 | 8.3E-01 |
| AT3G10986 | <i>AT3G10986</i> | LURP-one-like protein (DUF567)                                                                        | 2.5 | 1.7E-04 | 1.1E-03 | 1.2  | 3.8E-01 | 7.1E-01 |
| AT2G40390 | <i>AT2G40390</i> | neuronal PAS domain protein                                                                           | 2.5 | 2.8E-03 | 1.2E-02 | 1.3  | 3.7E-01 | 7.0E-01 |
| AT4G17970 | <i>ALMT12</i>    | aluminum-activated, malate transporter 12                                                             | 2.5 | 3.1E-05 | 2.6E-04 | 1.0  | 8.6E-01 | 9.6E-01 |
| AT4G27410 | <i>RD26</i>      | NAC (No Apical Meristem) domain transcriptional regulator superfamily protein                         | 2.5 | 1.0E-08 | 2.7E-07 | 1.7  | 5.1E-05 | 5.2E-03 |
| AT3G44990 | <i>XTH31</i>     | xyloglucan endo-transglycosylase-related 8                                                            | 2.5 | 2.6E-10 | 1.2E-08 | 1.4  | 1.5E-03 | 4.6E-02 |
| AT5G18470 | <i>AT5G18470</i> | Curculin-like (mannose-binding) lectin family                                                         | 2.4 | 2.1E-05 | 1.9E-04 | 1.8  | 1.7E-03 | 4.9E-02 |
| AT1G51090 | <i>AT1G51090</i> | Heavy metal transport/detoxification superfamily protein                                              | 2.4 | 2.5E-03 | 1.0E-02 | 1.3  | 4.1E-01 | 7.3E-01 |
| AT2G29670 | <i>AT2G29670</i> | Tetratricopeptide repeat (TPR)-like superfamily protein                                               | 2.4 | 1.6E-05 | 1.5E-04 | -1.0 | 8.4E-01 | 9.5E-01 |
| AT3G03440 | <i>AT3G03440</i> | ARM repeat superfamily protein                                                                        | 2.4 | 4.3E-11 | 2.4E-09 | 1.4  | 3.9E-04 | 2.0E-02 |
| AT5G40500 | <i>AT5G40500</i> | hypothetical protein                                                                                  | 2.4 | 1.8E-08 | 4.4E-07 | 1.2  | 1.5E-01 | 4.8E-01 |
| AT5G08650 | <i>AT5G08650</i> | Small GTP-binding protein                                                                             | 2.4 | 1.9E-09 | 6.3E-08 | 1.4  | 8.8E-03 | 1.2E-01 |
| AT1G48320 | <i>DHNAT1</i>    | Thioesterase superfamily protein                                                                      | 2.4 | 3.9E-10 | 1.6E-08 | 1.2  | 5.4E-02 | 3.0E-01 |
| AT4G29110 | <i>AT4G29110</i> | cotton fiber protein                                                                                  | 2.4 | 2.7E-05 | 2.4E-04 | -1.0 | 9.3E-01 | 9.8E-01 |
| AT4G28025 | <i>AT4G28025</i> | hypothetical protein                                                                                  | 2.4 | 3.4E-13 | 3.6E-11 | 1.1  | 2.1E-01 | 5.5E-01 |
| AT3G19480 | <i>AT3G19480</i> | D-3-phosphoglycerate dehydrogenase                                                                    | 2.4 | 7.6E-09 | 2.1E-07 | 1.6  | 3.6E-04 | 2.0E-02 |
| AT5G13650 | <i>SVR3</i>      | elongation factor family protein                                                                      | 2.4 | 1.8E-10 | 8.5E-09 | 1.3  | 1.1E-02 | 1.4E-01 |
| AT3G22060 | <i>AT3G22060</i> | Receptor-like protein kinase-related family protein                                                   | 2.4 | 2.9E-06 | 3.5E-05 | 1.1  | 4.8E-01 | 7.8E-01 |
| AT4G04330 | <i>RbcX1</i>     | Chaperonin-like RbcX protein                                                                          | 2.4 | 4.3E-06 | 4.9E-05 | 1.1  | 5.5E-01 | 8.2E-01 |
| AT1G48650 | <i>AT1G48650</i> | DEA(D/H)-box RNA helicase family protein                                                              | 2.4 | 3.2E-14 | 4.2E-12 | 1.2  | 1.1E-02 | 1.3E-01 |
| AT3G21400 | <i>AT3G21400</i> | dynein beta chain, ciliary protein                                                                    | 2.4 | 1.5E-10 | 7.1E-09 | 1.1  | 2.7E-01 | 6.2E-01 |
| AT1G08570 | <i>ACHT4</i>     | atypical CYS HIS rich thioredoxin 4                                                                   | 2.4 | 6.4E-17 | 2.0E-14 | 1.1  | 1.7E-01 | 5.1E-01 |
| AT1G07010 | <i>SLP1</i>      | Calcineurin-like metallo-phosphoesterase superfamily protein                                          | 2.4 | 7.3E-10 | 2.8E-08 | 1.3  | 7.8E-03 | 1.1E-01 |
| AT1G32900 | <i>GBSS1</i>     | UDP-Glycosyltransferase superfamily protein                                                           | 2.4 | 1.1E-06 | 1.5E-05 | 1.2  | 1.6E-01 | 4.9E-01 |
| AT3G10060 | <i>AT3G10060</i> | FKBP-like peptidyl-prolyl cis-trans isomerase family protein                                          | 2.4 | 1.9E-09 | 6.4E-08 | 1.3  | 1.1E-02 | 1.4E-01 |
| AT5G48300 | <i>ADG1</i>      | ADP glucose pyrophosphorylase 1                                                                       | 2.4 | 8.4E-09 | 2.3E-07 | 1.5  | 1.9E-03 | 5.4E-02 |
| AT4G39980 | <i>DHS1</i>      | 3-deoxy-D-arabino-heptulosonate 7-phosphate synthase 1                                                | 2.4 | 2.4E-13 | 2.6E-11 | 1.1  | 7.9E-02 | 3.6E-01 |
| AT3G05360 | <i>RLP30</i>     | receptor like protein 30                                                                              | 2.4 | 8.3E-08 | 1.6E-06 | 1.5  | 2.1E-03 | 5.7E-02 |
| AT1G49380 | <i>AT1G49380</i> | cytochrome c biogenesis protein family                                                                | 2.4 | 1.6E-09 | 5.6E-08 | 1.2  | 1.3E-01 | 4.6E-01 |
| AT1G18660 | <i>AT1G18660</i> | zinc finger (C3HC4-type RING finger) family protein                                                   | 2.4 | 1.7E-15 | 3.3E-13 | 1.0  | 6.6E-01 | 8.8E-01 |
| AT2G13570 | <i>NF-YB7</i>    | nuclear factor Y, subunit B7                                                                          | 2.4 | 6.7E-03 | 2.3E-02 | -1.0 | 9.1E-01 | 9.8E-01 |
| AT5G05200 | <i>AT5G05200</i> | Protein kinase superfamily protein                                                                    | 2.4 | 1.6E-12 | 1.4E-10 | 1.2  | 1.4E-02 | 1.6E-01 |
| AT1G44000 | <i>AT1G44000</i> | STAY-GREEN-like protein                                                                               | 2.4 | 1.8E-07 | 3.2E-06 | 1.3  | 3.0E-02 | 2.3E-01 |
| AT2G03310 | <i>AT2G03310</i> | transmembrane protein                                                                                 | 2.4 | 2.1E-06 | 2.6E-05 | 1.2  | 2.8E-01 | 6.3E-01 |
| AT1G16080 | <i>AT1G16080</i> | nuclear protein                                                                                       | 2.4 | 2.5E-10 | 1.1E-08 | 1.5  | 2.7E-04 | 1.6E-02 |
| AT3G52540 | <i>OFFP18</i>    | ovate family protein 18                                                                               | 2.4 | 3.9E-06 | 4.5E-05 | -1.1 | 7.4E-01 | 9.1E-01 |
| AT2G35390 | <i>AT2G35390</i> | Phosphoribosyltransferase family protein                                                              | 2.4 | 5.4E-10 | 2.2E-08 | 1.5  | 8.8E-04 | 3.4E-02 |
| AT4G24700 | <i>AT4G24700</i> | hypothetical protein                                                                                  | 2.4 | 2.3E-09 | 7.5E-08 | -1.0 | 9.2E-01 | 9.8E-01 |
| AT4G26790 | <i>AT4G26790</i> | GDSSL-like Lipase/Acylhydrolase superfamily protein                                                   | 2.4 | 7.4E-05 | 5.5E-04 | 1.4  | 7.2E-02 | 3.4E-01 |
| AT1G77090 | <i>AT1G77090</i> | thylakoid lumenal protein (Mog1/PsbP/DUF1795-like photosystem II reaction center PsbP family protein) | 2.4 | 5.1E-11 | 2.8E-09 | 1.4  | 2.3E-03 | 6.0E-02 |
| AT4G35783 | <i>RTFL6</i>     | ROTUNDIFOLIA like 6                                                                                   | 2.4 | 1.1E-04 | 7.7E-04 | -1.1 | 6.8E-01 | 8.9E-01 |
| AT4G00370 | <i>ANTR2</i>     | Major facilitator superfamily protein                                                                 | 2.4 | 2.1E-12 | 1.7E-10 | 1.1  | 1.2E-01 | 4.4E-01 |
| AT2G04039 | <i>AT2G04039</i> | DUF2996 family protein                                                                                | 2.4 | 2.4E-08 | 5.6E-07 | 1.3  | 2.5E-02 | 2.1E-01 |
| AT4G10040 | <i>CYTC-2</i>    | cytochrome c-2                                                                                        | 2.4 | 4.3E-15 | 7.4E-13 | 1.2  | 1.7E-02 | 1.7E-01 |
| AT2G36290 | <i>AT2G36290</i> | alpha/beta-Hydrolases superfamily protein                                                             | 2.4 | 5.7E-13 | 5.6E-11 | 1.2  | 7.8E-02 | 3.6E-01 |
| AT2G36895 | <i>AT2G36895</i> | D-tagatose-1,6-bisphosphate aldolase subunit                                                          | 2.4 | 7.6E-10 | 2.8E-08 | 1.3  | 9.6E-03 | 1.3E-01 |
| AT3G62090 | <i>PIL2</i>      | phytochrome interacting factor 3-like 2                                                               | 2.4 | 2.6E-06 | 3.2E-05 | 2.0  | 7.2E-05 | 6.6E-03 |
| AT4G34190 | <i>SEP1</i>      | stress enhanced protein 1                                                                             | 2.4 | 7.0E-10 | 2.7E-08 | 1.2  | 5.9E-02 | 3.1E-01 |
| AT4G39730 | <i>PLAT1</i>     | Lipase/lipoxygenase, PLAT/LH2 family protein                                                          | 2.4 | 2.4E-09 | 7.8E-08 | 1.2  | 1.5E-01 | 4.9E-01 |
| AT1G45474 | <i>Lhca5</i>     | photosystem I light harvesting complex protein 5                                                      | 2.4 | 6.9E-10 | 2.6E-08 | 1.4  | 1.9E-03 | 5.4E-02 |

|           |                   |                                                                                   |     |         |         |      |         |         |
|-----------|-------------------|-----------------------------------------------------------------------------------|-----|---------|---------|------|---------|---------|
| AT2G04030 | <i>CR88</i>       | Chaperone protein htpG family protein                                             | 2.4 | 5.9E-10 | 2.3E-08 | 1.6  | 9.0E-05 | 7.7E-03 |
| AT5G01260 | <i>AT5G01260</i>  | Carbohydrate-binding-like fold                                                    | 2.4 | 1.5E-09 | 5.2E-08 | 1.1  | 2.4E-01 | 5.9E-01 |
| AT4G19560 | <i>CYCT1</i>      |                                                                                   | 2.4 | 8.5E-04 | 4.3E-03 | 1.3  | 2.2E-01 | 5.7E-01 |
| AT1G69200 | <i>FLN2</i>       | fructokinase-like protein                                                         | 2.4 | 2.2E-07 | 3.9E-06 | 1.3  | 5.6E-02 | 3.0E-01 |
| AT2G19150 | <i>AT2G19150</i>  | Pectin lyase-like superfamily protein                                             | 2.4 | 6.1E-03 | 2.2E-02 | 2.2  | 1.0E-02 | 1.3E-01 |
| AT3G21390 | <i>AT3G21390</i>  | Mitochondrial substrate carrier family protein                                    | 2.4 | 2.2E-11 | 1.3E-09 | 1.2  | 2.5E-02 | 2.0E-01 |
| AT3G48240 | <i>AT3G48240</i>  | Octicosapeptide/Phox/Bem1p family protein                                         | 2.4 | 1.2E-02 | 3.8E-02 | 1.3  | 4.0E-01 | 7.2E-01 |
| AT2G21330 | <i>FBA1</i>       | fructose-bisphosphate aldolase 1                                                  | 2.4 | 3.2E-08 | 7.3E-07 | 1.5  | 1.5E-03 | 4.7E-02 |
| AT5G62490 | <i>HVA22B</i>     | HVA22 homologue B                                                                 | 2.4 | 8.7E-03 | 2.9E-02 | 1.3  | 3.3E-01 | 6.8E-01 |
| AT3G08505 | <i>AT3G08505</i>  | zinc finger (CCCH-type/C3HC4-type RING finger) family protein                     | 2.4 | 1.7E-10 | 7.8E-09 | 1.2  | 1.2E-01 | 4.5E-01 |
| AT5G04140 | <i>GLU1</i>       | glutamate synthase 1                                                              | 2.4 | 4.5E-07 | 7.1E-06 | 1.7  | 4.1E-04 | 2.1E-02 |
| AT5G14700 | <i>AT5G14700</i>  | NAD(P)-binding Rossmann-fold superfamily protein                                  | 2.4 | 3.0E-07 | 4.9E-06 | 1.3  | 8.7E-02 | 3.7E-01 |
| AT1G24090 | <i>AT1G24090</i>  | RNase H family protein                                                            | 2.4 | 1.4E-03 | 6.6E-03 | 1.1  | 7.8E-01 | 9.3E-01 |
| AT5G55620 | <i>AT5G55620</i>  | hypothetical protein                                                              | 2.4 | 9.7E-07 | 1.4E-05 | 1.0  | 9.2E-01 | 9.8E-01 |
| AT5G15910 | <i>AT5G15910</i>  | NAD(P)-binding Rossmann-fold superfamily protein                                  | 2.4 | 1.6E-15 | 3.3E-13 | 1.1  | 8.2E-02 | 3.6E-01 |
| AT2G23600 | <i>ACL</i>        | acetone-cyanohydrin lyase                                                         | 2.4 | 7.3E-08 | 1.5E-06 | 1.1  | 6.1E-01 | 8.5E-01 |
| AT5G38520 | <i>AT5G38520</i>  | alpha/beta-Hydrolases superfamily protein                                         | 2.4 | 4.4E-10 | 1.8E-08 | 1.2  | 4.2E-02 | 2.7E-01 |
| AT2G28305 | <i>LOG1</i>       | Putative lysine decarboxylase family protein                                      | 2.4 | 1.4E-09 | 4.9E-08 | 1.0  | 7.2E-01 | 9.0E-01 |
| AT5G44550 | <i>AT5G44550</i>  | Uncharacterized protein family (UPF0497)                                          | 2.4 | 6.8E-05 | 5.1E-04 | 1.4  | 9.5E-02 | 3.9E-01 |
| AT5G58260 | <i>NdhN</i>       | oxidoreductases, acting on NADH or NADPH, quinone or similar compound as acceptor | 2.3 | 1.2E-08 | 3.2E-07 | 1.6  | 2.1E-04 | 1.4E-02 |
| AT1G08270 | <i>AT1G08270</i>  | vacuolar protein sorting-associated protein                                       | 2.3 | 9.1E-04 | 4.5E-03 | -1.3 | 3.3E-01 | 6.7E-01 |
| AT5G13370 | <i>AT5G13370</i>  | Auxin-responsive GH3 family protein                                               | 2.3 | 5.9E-13 | 5.7E-11 | 1.7  | 7.4E-08 | 4.2E-05 |
| AT5G08720 | <i>AT5G08720</i>  | polyketide cyclase/dehydrase/lipid transporter                                    | 2.3 | 3.6E-08 | 7.9E-07 | 1.5  | 1.5E-03 | 4.7E-02 |
| AT5G43290 | <i>WRKY49</i>     | WRKY DNA-binding protein 49                                                       | 2.3 | 4.3E-05 | 3.5E-04 | -1.0 | 9.0E-01 | 9.8E-01 |
| AT5G20070 | <i>NUDX19</i>     | nudix hydrolase homolog 19                                                        | 2.3 | 1.1E-17 | 4.0E-15 | 1.3  | 8.5E-05 | 7.5E-03 |
| AT1G10657 | <i>AT1G10657</i>  | transmembrane protein                                                             | 2.3 | 3.3E-06 | 4.0E-05 | 1.0  | 8.4E-01 | 9.5E-01 |
| AT2G30420 | <i>ETC2</i>       | Homeodomain-like superfamily protein                                              | 2.3 | 1.4E-02 | 4.2E-02 | 1.0  | 9.0E-01 | 9.7E-01 |
| AT2G01590 | <i>CRR3</i>       | chlororespiratory reduction 3                                                     | 2.3 | 2.0E-08 | 4.8E-07 | 1.4  | 6.2E-03 | 1.0E-01 |
| AT5G33370 | <i>AT5G33370</i>  | GDSL-like Lipase/Acylhydrolase superfamily protein                                | 2.3 | 1.5E-02 | 4.6E-02 | -1.8 | 1.1E-01 | 4.1E-01 |
| AT1G55910 | <i>ZIP11</i>      | zinc transporter 11 precursor                                                     | 2.3 | 9.9E-11 | 4.9E-09 | 1.1  | 3.8E-01 | 7.1E-01 |
| AT5G62360 | <i>AT5G62360</i>  | Plant invertase/pectin methylesterase inhibitor superfamily protein               | 2.3 | 7.1E-04 | 3.7E-03 | 1.3  | 2.5E-01 | 6.0E-01 |
| AT4G14210 | <i>PDS3</i>       | phytoene desaturase 3                                                             | 2.3 | 3.9E-12 | 2.9E-10 | 1.3  | 2.8E-03 | 6.6E-02 |
| AT1G17220 | <i>FUG1</i>       | Translation initiation factor 2, small GTP-binding protein                        | 2.3 | 3.7E-09 | 1.2E-07 | 1.4  | 2.9E-03 | 6.8E-02 |
| AT5G21482 | <i>CKX7</i>       | cytokinin oxidase 7                                                               | 2.3 | 5.3E-07 | 8.2E-06 | 1.1  | 4.1E-01 | 7.3E-01 |
| AT3G09160 | <i>AT3G09160</i>  | RNA-binding (RRM/RBD/RNP motifs) family protein                                   | 2.3 | 1.5E-05 | 1.4E-04 | 1.2  | 3.4E-01 | 6.8E-01 |
| AT4G22200 | <i>KT2/3</i>      | potassium transport 2/3                                                           | 2.3 | 3.1E-07 | 5.1E-06 | 1.2  | 2.3E-01 | 5.8E-01 |
| AT4G30470 | <i>AT4G30470</i>  | NAD(P)-binding Rossmann-fold superfamily protein                                  | 2.3 | 2.9E-10 | 1.3E-08 | 1.0  | 9.0E-01 | 9.7E-01 |
| AT4G06744 | <i>AT4G06744</i>  | Leucine-rich repeat (LRR) family protein                                          | 2.3 | 9.1E-09 | 2.4E-07 | 1.6  | 7.6E-05 | 6.8E-03 |
| AT5G51010 | <i>AT5G51010</i>  | Rubredoxin-like superfamily protein                                               | 2.3 | 3.0E-12 | 2.3E-10 | 1.3  | 6.7E-03 | 1.0E-01 |
| AT1G63580 | <i>AT1G63580</i>  | Receptor-like protein kinase-related family protein                               | 2.3 | 1.3E-02 | 3.9E-02 | -1.3 | 4.6E-01 | 7.6E-01 |
| AT1G16390 | <i>AT1G16390</i>  | organic cation/carnitine transporter 3                                            | 2.3 | 3.2E-06 | 3.9E-05 | -1.2 | 2.2E-01 | 5.7E-01 |
| AT5G47870 | <i>RAD52-2</i>    | cobalt ion-binding protein                                                        | 2.3 | 9.0E-14 | 1.1E-11 | 1.1  | 2.0E-01 | 5.4E-01 |
| AT2G30424 | <i>TCL2</i>       | Homeodomain-like superfamily protein                                              | 2.3 | 3.8E-07 | 6.1E-06 | -1.1 | 4.9E-01 | 7.8E-01 |
| AT5G23120 | <i>HCF136</i>     | photosystem II stability/assembly factor, chloroplast (HCF136)                    | 2.3 | 1.7E-09 | 6.0E-08 | 1.3  | 2.3E-02 | 2.0E-01 |
| AT3G62930 | <i>AT3G62930</i>  | Thioredoxin superfamily protein                                                   | 2.3 | 1.4E-05 | 1.3E-04 | -1.1 | 4.9E-01 | 7.8E-01 |
| AT4G20860 | <i>AT4G20860</i>  | FAD-binding Berberine family protein                                              | 2.3 | 3.3E-08 | 7.4E-07 | 1.4  | 4.0E-03 | 8.0E-02 |
| AT1G14345 | <i>AT1G14345</i>  | NAD(P)-linked oxidoreductase superfamily protein                                  | 2.3 | 2.9E-09 | 9.1E-08 | 1.3  | 9.6E-03 | 1.3E-01 |
| AT2G29370 | <i>AT2G29370</i>  | NAD(P)-binding Rossmann-fold superfamily protein                                  | 2.3 | 4.2E-04 | 2.4E-03 | 1.2  | 3.2E-01 | 6.7E-01 |
| AT1G68010 | <i>HPR</i>        | hydroxypyruvate reductase                                                         | 2.3 | 8.4E-08 | 1.7E-06 | 1.3  | 4.5E-02 | 2.8E-01 |
| AT3G49160 | <i>AT3G49160</i>  | pyruvate kinase family protein                                                    | 2.3 | 6.1E-05 | 4.7E-04 | 1.1  | 5.8E-01 | 8.4E-01 |
| AT3G19800 | <i>AT3G19800</i>  | E3 ubiquitin-protein ligase, putative (DUF177)                                    | 2.3 | 2.0E-09 | 6.8E-08 | 1.2  | 5.1E-02 | 2.9E-01 |
| AT5G50240 | <i>PIMT2</i>      | protein-l-isoaspartate methyltransferase 2                                        | 2.3 | 2.6E-10 | 1.2E-08 | 1.2  | 8.8E-02 | 3.8E-01 |
| AT2G27290 | <i>AT2G27290</i>  | FAM210B-like protein, putative (DUF1279)                                          | 2.3 | 9.4E-10 | 3.5E-08 | 1.1  | 2.8E-01 | 6.3E-01 |
| AT2G40340 | <i>DREB2C</i>     | Integrase-type DNA-binding superfamily protein                                    | 2.3 | 2.5E-03 | 1.1E-02 | 1.1  | 7.5E-01 | 9.2E-01 |
| AT1G70610 | <i>ABC26</i>      | transporter associated with antigen processing protein 1                          | 2.3 | 3.9E-08 | 8.5E-07 | 1.4  | 4.7E-03 | 8.7E-02 |
| AT5G18660 | <i>PCB2</i>       | NAD(P)-binding Rossmann-fold superfamily protein                                  | 2.3 | 1.5E-05 | 1.4E-04 | 1.4  | 3.5E-02 | 2.4E-01 |
| AT1G33102 | <i>AT1G33102</i>  | hypothetical protein                                                              | 2.3 | 4.3E-03 | 1.6E-02 | 1.9  | 2.4E-02 | 2.0E-01 |
| AT1G80030 | <i>AT1G80030</i>  | Molecular chaperone Hsp40/DnaJ family protein                                     | 2.3 | 1.2E-12 | 1.0E-10 | 1.2  | 9.0E-03 | 1.2E-01 |
| AT1G61890 | <i>AT1G61890</i>  | MATE efflux family protein                                                        | 2.3 | 8.6E-11 | 4.4E-09 | 1.4  | 5.2E-04 | 2.4E-02 |
| AT4G34090 | <i>AT4G34090</i>  | cyclin delta-3                                                                    | 2.3 | 3.6E-09 | 1.1E-07 | 1.4  | 6.4E-03 | 1.0E-01 |
| AT2G29450 | <i>GSTU5</i>      | glutathione S-transferase tau 5                                                   | 2.3 | 1.3E-11 | 8.3E-10 | 1.2  | 1.5E-02 | 1.6E-01 |
| AT5G65870 | <i>PSK5</i>       | phytosulfokine 5 precursor                                                        | 2.3 | 1.2E-06 | 1.7E-05 | 1.3  | 7.9E-02 | 3.6E-01 |
| AT1G26500 | <i>AT1G26500</i>  | Pentatricopeptide repeat (PPR) superfamily protein                                | 2.3 | 1.6E-03 | 7.2E-03 | 1.1  | 7.9E-01 | 9.3E-01 |
| AT4G15765 | <i>AT4G15765</i>  | FAD/NAD(P)-binding oxidoreductase family protein                                  | 2.3 | 4.0E-06 | 4.6E-05 | 1.2  | 2.3E-01 | 5.8E-01 |
| AT5G08050 | <i>AT5G08050</i>  | wiskott-aldrich syndrome family protein, putative (DUF1118)                       | 2.3 | 1.9E-09 | 6.4E-08 | 1.2  | 8.2E-02 | 3.6E-01 |
| AT4G15440 | <i>HPL1</i>       | hydroperoxide lyase 1                                                             | 2.3 | 8.9E-03 | 3.0E-02 | 1.8  | 6.0E-02 | 3.2E-01 |
| AT2G39470 | <i>PnsL1</i>      | PsbP-like protein 2                                                               | 2.3 | 7.4E-07 | 1.1E-05 | 1.5  | 4.8E-03 | 8.8E-02 |
| AT5G16010 | <i>AT5G16010</i>  | 3-oxo-5-alpha-steroid 4-dehydrogenase family protein                              | 2.3 | 5.5E-11 | 3.0E-09 | 1.4  | 1.1E-03 | 4.0E-02 |
| AT1G62560 | <i>FMO GS-OX3</i> | flavin-monooxygenase glucosinolate S-oxygenase 3                                  | 2.3 | 6.3E-04 | 3.3E-03 | 1.2  | 5.3E-01 | 8.0E-01 |
| AT1G05340 | <i>AT1G05340</i>  | cysteine-rich TM module stress tolerance protein                                  | 2.3 | 3.9E-04 | 2.2E-03 | -1.0 | 9.8E-01 | 1.0E+00 |
| AT1G64500 | <i>AT1G64500</i>  | Glutaredoxin family protein                                                       | 2.3 | 1.1E-09 | 4.0E-08 | 1.2  | 9.3E-02 | 3.9E-01 |
| AT3G17800 | <i>AT3G17800</i>  | alanine-tRNA ligase, putative (DUF760)                                            | 2.3 | 7.6E-12 | 5.2E-10 | 1.1  | 1.1E-01 | 4.1E-01 |
| AT1G71140 | <i>AT1G71140</i>  | MATE efflux family protein                                                        | 2.3 | 2.1E-03 | 8.8E-03 | 2.0  | 3.9E-03 | 7.9E-02 |
| AT5G24460 | <i>AT5G24460</i>  | RING-H2 zinc finger protein                                                       | 2.3 | 6.6E-12 | 4.6E-10 | -1.0 | 7.4E-01 | 9.1E-01 |
| AT3G16220 | <i>AT3G16220</i>  | Putative eukaryotic LigT                                                          | 2.3 | 5.4E-08 | 1.1E-06 | 1.0  | 8.1E-01 | 9.4E-01 |

|           |                  |                                                                                 |     |         |         |      |         |         |
|-----------|------------------|---------------------------------------------------------------------------------|-----|---------|---------|------|---------|---------|
| AT3G15352 | <i>COX17</i>     | cytochrome c oxidase 17                                                         | 2.3 | 6.6E-06 | 7.1E-05 | 1.1  | 4.6E-01 | 7.7E-01 |
| AT3G01060 | <i>AT3G01060</i> | lysine-tRNA ligase                                                              | 2.3 | 6.0E-09 | 1.7E-07 | 1.5  | 1.1E-03 | 4.0E-02 |
| AT2G25080 | <i>GPX1</i>      | glutathione peroxidase 1                                                        | 2.3 | 1.6E-06 | 2.1E-05 | 1.1  | 6.3E-01 | 8.6E-01 |
| AT2G40330 | <i>PYL6</i>      | PYR1-like 6                                                                     | 2.3 | 1.9E-03 | 8.1E-03 | 1.1  | 7.5E-01 | 9.2E-01 |
| AT4G36580 | <i>AT4G36580</i> | AAA-type ATPase family protein                                                  | 2.3 | 8.1E-06 | 8.4E-05 | 1.2  | 3.1E-01 | 6.5E-01 |
| AT4G06746 | <i>RAP2.9</i>    | related to AP2 9                                                                | 2.3 | 4.5E-03 | 1.7E-02 | 2.1  | 1.3E-02 | 1.5E-01 |
| AT2G25620 | <i>DBP1</i>      | DNA-binding protein phosphatase 1                                               | 2.3 | 1.1E-12 | 9.9E-11 | 1.1  | 2.2E-01 | 5.7E-01 |
| AT1G05562 | <i>AT1G05562</i> | Natural antisense transcript overlaps with AT1G05560                            | 2.3 | 6.0E-08 | 1.2E-06 | 1.2  | 1.7E-01 | 5.1E-01 |
| AT5G27290 | <i>AT5G27290</i> | stress regulated protein                                                        | 2.3 | 1.4E-06 | 1.9E-05 | 1.4  | 1.5E-02 | 1.6E-01 |
| AT4G34990 | <i>MYB32</i>     | myb domain protein 32                                                           | 2.3 | 2.7E-06 | 3.3E-05 | 1.1  | 4.2E-01 | 7.3E-01 |
| AT4G21380 | <i>RK3</i>       | receptor kinase 3                                                               | 2.3 | 9.3E-03 | 3.1E-02 | 1.0  | 9.2E-01 | 9.8E-01 |
| AT1G36160 | <i>ACC1</i>      | acetyl-CoA carboxylase 1                                                        | 2.3 | 3.6E-13 | 3.7E-11 | 1.3  | 2.4E-04 | 1.5E-02 |
| AT4G28250 | <i>EXPB3</i>     | expansin B3                                                                     | 2.3 | 1.3E-06 | 1.8E-05 | 1.0  | 8.6E-01 | 9.6E-01 |
| AT2G05510 | <i>AT2G05510</i> | Glycine-rich protein family                                                     | 2.3 | 3.3E-03 | 1.3E-02 | 2.2  | 4.8E-03 | 8.8E-02 |
| AT1G26761 | <i>AT1G26761</i> | Arabinanase/levansucrase/invertase                                              | 2.3 | 9.5E-08 | 1.8E-06 | 1.3  | 7.6E-02 | 3.5E-01 |
| AT5G17300 | <i>RVE1</i>      | Homeodomain-like superfamily protein                                            | 2.3 | 5.6E-09 | 1.6E-07 | 1.1  | 3.5E-01 | 6.9E-01 |
| AT4G27520 | <i>ENODL2</i>    | early nodulin-like protein 2                                                    | 2.3 | 6.4E-08 | 1.3E-06 | 1.3  | 6.6E-02 | 3.3E-01 |
| AT5G47650 | <i>NUDT2</i>     | nudix hydrolase homolog 2                                                       | 2.3 | 5.1E-13 | 5.1E-11 | 1.1  | 4.2E-01 | 7.4E-01 |
| AT5G15340 | <i>AT5G15340</i> | Pentatricopeptide repeat (PPR) superfamily protein                              | 2.3 | 5.9E-04 | 3.2E-03 | 1.6  | 3.5E-02 | 2.5E-01 |
| AT1G11790 | <i>ADT1</i>      | arogenate dehydratase 1                                                         | 2.3 | 1.4E-08 | 3.4E-07 | 1.1  | 2.9E-01 | 6.4E-01 |
| AT1G71480 | <i>AT1G71480</i> | Nuclear transport factor 2 (NTF2) family protein                                | 2.3 | 1.8E-09 | 6.2E-08 | 1.2  | 5.0E-02 | 2.9E-01 |
| AT5G24130 | <i>AT5G24130</i> | polypyrimidine tract-binding-like protein                                       | 2.3 | 1.0E-04 | 7.1E-04 | 1.3  | 1.7E-01 | 5.1E-01 |
| AT1G32870 | <i>NAC13</i>     | NAC domain protein 13                                                           | 2.3 | 6.8E-12 | 4.7E-10 | 1.6  | 3.9E-06 | 8.0E-04 |
| AT5G22630 | <i>ADT5</i>      | arogenate dehydratase 5                                                         | 2.3 | 2.1E-09 | 7.1E-08 | 1.5  | 1.6E-04 | 1.1E-02 |
| AT5G06220 | <i>AT5G06220</i> | LETM1-like protein                                                              | 2.3 | 2.8E-12 | 2.2E-10 | 1.1  | 1.5E-01 | 4.8E-01 |
| AT3G01440 | <i>PnsL3</i>     | PsbQ-like 1                                                                     | 2.3 | 2.3E-06 | 2.9E-05 | 1.5  | 3.9E-03 | 7.8E-02 |
| AT1G05065 | <i>CLE20</i>     | CLAVATA3/ESR-RELATED 20                                                         | 2.3 | 7.2E-04 | 3.7E-03 | -1.1 | 5.5E-01 | 8.2E-01 |
| AT3G14900 | <i>EMB3120</i>   | hypothetical protein                                                            | 2.3 | 5.1E-04 | 2.8E-03 | 1.2  | 3.3E-01 | 6.7E-01 |
| AT5G20140 | <i>HBP5</i>      | SOUL heme-binding family protein                                                | 2.3 | 6.4E-09 | 1.8E-07 | 1.2  | 4.5E-02 | 2.8E-01 |
| AT4G08390 | <i>SAPX</i>      | stromal ascorbate peroxidase                                                    | 2.3 | 8.5E-15 | 1.3E-12 | 1.3  | 3.3E-05 | 3.8E-03 |
| AT1G43670 | <i>FBP</i>       | Inositol monophosphatase family protein                                         | 2.3 | 4.5E-08 | 9.6E-07 | 1.2  | 6.6E-02 | 3.3E-01 |
| AT4G39710 | <i>PnsL4</i>     | FK506-binding protein 16-2                                                      | 2.3 | 2.1E-07 | 3.6E-06 | 1.5  | 1.3E-03 | 4.3E-02 |
| AT1G15510 | <i>ECB2</i>      | Tetratricopeptide repeat (TPR)-like superfamily protein                         | 2.3 | 5.1E-08 | 1.1E-06 | -1.1 | 5.6E-01 | 8.2E-01 |
| AT3G30775 | <i>ERD5</i>      | Methylenetetrahydrofolate reductase family                                      | 2.3 | 3.1E-10 | 1.3E-08 | -1.2 | 2.0E-02 | 1.9E-01 |
| AT1G47760 | <i>AGL102</i>    | AGAMOUS-like 102                                                                | 2.3 | 1.3E-03 | 6.2E-03 | -1.2 | 5.3E-01 | 8.1E-01 |
| AT4G25130 | <i>PMSR4</i>     | peptide met sulfoxide reductase 4                                               | 2.3 | 1.8E-14 | 2.5E-12 | 1.3  | 8.9E-04 | 3.5E-02 |
| AT2G47180 | <i>GolS1</i>     | galactinol synthase 1                                                           | 2.3 | 2.4E-05 | 2.1E-04 | 1.0  | 7.9E-01 | 9.3E-01 |
| AT1G22850 | <i>AT1G22850</i> | SNARE associated Golgi protein family                                           | 2.2 | 8.1E-12 | 5.4E-10 | 1.2  | 3.9E-02 | 2.6E-01 |
| AT1G29640 | <i>AT1G29640</i> | senescence regulator (Protein of unknown function, DUF584)                      | 2.2 | 1.7E-06 | 2.2E-05 | 1.4  | 3.8E-02 | 2.5E-01 |
| AT1G29420 | <i>AT1G29420</i> | SAUR-like auxin-responsive protein family                                       | 2.2 | 1.7E-02 | 4.9E-02 | -1.4 | 3.4E-01 | 6.8E-01 |
| AT5G14660 | <i>PDF1B</i>     | peptide deformylase 1B                                                          | 2.2 | 2.9E-10 | 1.3E-08 | 1.3  | 3.6E-03 | 7.5E-02 |
| AT1G58340 | <i>ZF14</i>      | MATE efflux family protein                                                      | 2.2 | 1.5E-07 | 2.7E-06 | 1.3  | 3.3E-02 | 2.4E-01 |
| AT1G35720 | <i>ANNAT1</i>    | annexin 1                                                                       | 2.2 | 9.4E-06 | 9.5E-05 | 1.2  | 1.9E-01 | 5.4E-01 |
| AT2G30150 | <i>AT2G30150</i> | UDP-Glycosyltransferase superfamily protein                                     | 2.2 | 3.4E-10 | 1.5E-08 | 1.2  | 4.0E-02 | 2.6E-01 |
| AT4G30610 | <i>BRS1</i>      | alpha/beta-Hydrolases superfamily protein                                       | 2.2 | 4.9E-07 | 7.6E-06 | 1.3  | 4.8E-02 | 2.9E-01 |
| AT4G24120 | <i>YSL1</i>      | YELLOW STRIPE like 1                                                            | 2.2 | 1.2E-04 | 8.1E-04 | 1.2  | 4.1E-01 | 7.3E-01 |
| AT3G26960 | <i>AT3G26960</i> | Pollen Ole e 1 allergen and extensin family protein                             | 2.2 | 8.7E-03 | 2.9E-02 | -1.0 | 9.9E-01 | 1.0E+00 |
| AT1G62630 | <i>AT1G62630</i> | Disease resistance protein (CC-NBS-LRR class)                                   | 2.2 | 6.5E-06 | 7.0E-05 | 1.7  | 1.7E-03 | 5.0E-02 |
| AT4G26260 | <i>MIOX4</i>     | myo-inositol oxygenase 4                                                        | 2.2 | 2.5E-04 | 1.5E-03 | -2.5 | 8.8E-05 | 7.6E-03 |
| AT1G68870 | <i>SOFL2</i>     | SOB five-like 2                                                                 | 2.2 | 1.4E-04 | 9.4E-04 | -1.2 | 3.4E-01 | 6.8E-01 |
| AT3G55630 | <i>DFD</i>       | DHFS-FPGS homolog D                                                             | 2.2 | 1.3E-06 | 1.7E-05 | 1.4  | 2.0E-02 | 1.8E-01 |
| AT3G25250 | <i>AGC2-1</i>    | AGC (cAMP-dependent, cGMP-dependent and protein kinase C) kinase family protein | 2.2 | 3.3E-05 | 2.8E-04 | 1.7  | 4.6E-03 | 8.6E-02 |
| AT4G28680 | <i>TYRDC</i>     | L-tyrosine decarboxylase                                                        | 2.2 | 1.2E-02 | 3.7E-02 | 1.3  | 3.0E-01 | 6.5E-01 |
| AT1G71500 | <i>AT1G71500</i> | Rieske (2Fe-2S) domain-containing protein                                       | 2.2 | 2.6E-10 | 1.2E-08 | 1.4  | 7.3E-04 | 3.1E-02 |
| AT3G55330 | <i>PPL1</i>      | PsbP-like protein 1                                                             | 2.2 | 3.1E-06 | 3.7E-05 | 1.3  | 6.2E-02 | 3.2E-01 |
| AT2G16430 | <i>PAP10</i>     | purple acid phosphatase 10                                                      | 2.2 | 2.4E-09 | 7.7E-08 | 1.2  | 1.0E-01 | 4.0E-01 |
| AT1G05690 | <i>BT3</i>       | BTB and TAZ domain protein 3                                                    | 2.2 | 1.1E-05 | 1.1E-04 | 1.2  | 2.7E-01 | 6.1E-01 |
| AT2G30390 | <i>FC2</i>       | ferrochelatae 2                                                                 | 2.2 | 1.2E-09 | 4.2E-08 | 1.4  | 1.7E-03 | 5.0E-02 |
| AT3G54090 | <i>FLN1</i>      | fructokinase-like 1                                                             | 2.2 | 2.3E-08 | 5.4E-07 | 1.2  | 1.0E-01 | 4.0E-01 |
| AT2G29340 | <i>AT2G29340</i> | NAD-dependent epimerase/dehydratase family protein                              | 2.2 | 2.7E-08 | 6.2E-07 | 1.1  | 3.1E-01 | 6.5E-01 |
| AT1G75690 | <i>LQY1</i>      | DnaJ/Hsp40 cysteine-rich domain superfamily protein                             | 2.2 | 1.7E-09 | 6.0E-08 | 1.2  | 4.8E-02 | 2.9E-01 |
| AT2G19800 | <i>MIOX2</i>     | myo-inositol oxygenase 2                                                        | 2.2 | 9.8E-08 | 1.9E-06 | -1.4 | 1.4E-02 | 1.6E-01 |
| AT5G24990 | <i>AT5G24990</i> | enhanced disease resistance-like protein                                        | 2.2 | 3.5E-06 | 4.1E-05 | 1.0  | 8.3E-01 | 9.5E-01 |
| AT5G23170 | <i>AT5G23170</i> | Protein kinase superfamily protein                                              | 2.2 | 1.2E-06 | 1.7E-05 | 1.5  | 6.8E-03 | 1.1E-01 |
| AT1G65190 | <i>AT1G65190</i> | Protein kinase superfamily protein                                              | 2.2 | 1.4E-08 | 3.5E-07 | 1.1  | 2.4E-01 | 5.9E-01 |
| AT5G08070 | <i>TCP17</i>     | TCP domain protein 17                                                           | 2.2 | 2.0E-05 | 1.8E-04 | -1.0 | 8.4E-01 | 9.5E-01 |
| AT5G38660 | <i>APE1</i>      | acclimation of photosynthesis to environment                                    | 2.2 | 1.4E-10 | 6.7E-09 | 1.4  | 1.1E-03 | 3.9E-02 |
| AT3G14810 | <i>MSL5</i>      | mechanosensitive channel of small conductance-like 5                            | 2.2 | 6.7E-07 | 1.0E-05 | 1.2  | 1.4E-01 | 4.7E-01 |
| AT5G43630 | <i>TZP</i>       | zinc knuckle (CCHC-type) family protein                                         | 2.2 | 4.6E-12 | 3.4E-10 | 1.2  | 3.3E-02 | 2.4E-01 |
| AT1G70700 | <i>TIFY7</i>     | TIFY domain/Divergent CCT motif family protein                                  | 2.2 | 5.7E-10 | 2.2E-08 | 1.1  | 3.8E-01 | 7.1E-01 |
| AT5G47250 | <i>AT5G47250</i> | LRR and NB-ARC domains-containing disease resistance protein                    | 2.2 | 7.2E-06 | 7.6E-05 | 1.3  | 7.9E-02 | 3.6E-01 |
| AT2G46450 | <i>CNGC12</i>    | cyclic nucleotide-gated channel 12                                              | 2.2 | 1.9E-09 | 6.5E-08 | 1.4  | 2.9E-03 | 6.8E-02 |
| AT3G04790 | <i>EMB3119</i>   | Ribose 5-phosphate isomerase, type A protein                                    | 2.2 | 1.0E-07 | 1.9E-06 | 1.4  | 4.7E-03 | 8.7E-02 |
| AT3G17930 | <i>DAC</i>       | transmembrane protein                                                           | 2.2 | 1.3E-10 | 6.2E-09 | 1.3  | 4.5E-03 | 8.5E-02 |
| AT2G33530 | <i>scpl46</i>    | serine carboxypeptidase-like 46                                                 | 2.2 | 5.7E-06 | 6.2E-05 | 1.3  | 7.6E-02 | 3.5E-01 |



|           |                  |                                                                                                           |     |         |         |      |         |         |
|-----------|------------------|-----------------------------------------------------------------------------------------------------------|-----|---------|---------|------|---------|---------|
| AT5G13360 | <i>AT5G13360</i> | Auxin-responsive GH3 family protein                                                                       | 2.2 | 2.1E-12 | 1.7E-10 | 1.4  | 1.3E-04 | 9.9E-03 |
| AT1G68440 | <i>AT1G68440</i> | transmembrane protein                                                                                     | 2.2 | 2.5E-14 | 3.3E-12 | -1.0 | 8.8E-01 | 9.7E-01 |
| AT2G28605 | <i>AT2G28605</i> | Photosystem II reaction center PsbP family protein                                                        | 2.2 | 7.8E-06 | 8.1E-05 | 1.3  | 1.2E-01 | 4.4E-01 |
| AT2G26040 | <i>PYL2</i>      | PYR1-like 2                                                                                               | 2.2 | 2.0E-03 | 8.6E-03 | 1.1  | 6.3E-01 | 8.6E-01 |
| AT1G67360 | <i>AT1G67360</i> | Rubber elongation factor protein (REF)                                                                    | 2.2 | 4.7E-11 | 2.6E-09 | 1.3  | 2.6E-03 | 6.5E-02 |
| AT1G07510 | <i>ftsh10</i>    | FTSH protease 10                                                                                          | 2.2 | 7.5E-17 | 2.3E-14 | 1.1  | 3.7E-02 | 2.5E-01 |
| AT5G54130 | <i>AT5G54130</i> | Calcium-binding endonuclease/exonuclease/phosphatase family                                               | 2.2 | 5.2E-09 | 1.5E-07 | -1.0 | 9.6E-01 | 9.9E-01 |
| AT1G07985 | <i>AT1G07985</i> | Expressed protein                                                                                         | 2.2 | 5.8E-06 | 6.4E-05 | 1.3  | 1.4E-01 | 4.7E-01 |
| AT5G54960 | <i>PDC2</i>      | pyruvate decarboxylase-2                                                                                  | 2.2 | 5.2E-11 | 2.8E-09 | 1.3  | 7.5E-03 | 1.1E-01 |
| AT4G31398 | <i>AT4G31398</i> | Natural antisense transcript overlaps with AT4G31400                                                      | 2.2 | 1.5E-02 | 4.5E-02 | 1.3  | 3.9E-01 | 7.2E-01 |
| AT4G02530 | <i>AT4G02530</i> | chloroplast thylakoid lumen protein                                                                       | 2.2 | 4.0E-10 | 1.6E-08 | 1.4  | 1.6E-03 | 4.8E-02 |
| AT5G20380 | <i>PHT4</i>      |                                                                                                           | 2.2 | 1.5E-12 | 1.3E-10 | 1.2  | 4.6E-02 | 2.8E-01 |
| AT1G61470 | <i>AT1G61470</i> | Polynucleotidyl transferase, ribonuclease H-like superfamily protein                                      | 2.2 | 5.2E-03 | 1.9E-02 | -1.4 | 2.3E-01 | 5.8E-01 |
| AT5G01600 | <i>FER1</i>      | ferretin 1                                                                                                | 2.2 | 2.5E-05 | 2.2E-04 | 1.2  | 1.8E-01 | 5.2E-01 |
| AT5G13630 | <i>GUN5</i>      | magnesium-chelatase subunit chlH, chloroplast, putative / Mg-protoporphyrin IX chelatase, putative (CHLH) | 2.2 | 1.3E-07 | 2.4E-06 | 1.3  | 2.3E-02 | 2.0E-01 |
| AT2G28880 | <i>emb1997</i>   | para-aminobenzoate (PABA) synthase family                                                                 | 2.2 | 4.0E-08 | 8.7E-07 | 1.0  | 8.8E-01 | 9.6E-01 |
| AT3G13680 | <i>AT3G13680</i> | F-box and associated interaction domains-containing protein                                               | 2.2 | 1.4E-02 | 4.2E-02 | 1.0  | 9.9E-01 | 1.0E+00 |
| AT5G03210 | <i>DIP2</i>      | E3 ubiquitin-protein ligase                                                                               | 2.2 | 7.0E-03 | 2.4E-02 | 1.9  | 2.5E-02 | 2.0E-01 |
| AT4G21940 | <i>CPK15</i>     | calcium-dependent protein kinase 15                                                                       | 2.2 | 1.3E-05 | 1.3E-04 | 1.3  | 8.7E-02 | 3.8E-01 |
| AT2G38060 | <i>PHT4</i>      |                                                                                                           | 2.2 | 1.2E-05 | 1.2E-04 | -1.2 | 3.6E-01 | 7.0E-01 |
| AT3G59250 | <i>AT3G59250</i> | F-box/RNI-like superfamily protein                                                                        | 2.2 | 3.0E-05 | 2.5E-04 | 1.4  | 4.8E-02 | 2.9E-01 |
| AT1G75460 | <i>AT1G75460</i> | ATP-dependent protease La (LON) domain protein                                                            | 2.2 | 1.3E-07 | 2.3E-06 | 1.3  | 3.1E-02 | 2.3E-01 |
| AT5G08150 | <i>SOB5</i>      | suppressor of phytochrome b 5                                                                             | 2.2 | 8.0E-04 | 4.1E-03 | 1.2  | 3.8E-01 | 7.1E-01 |
| AT1G70760 | <i>NdhL</i>      | inorganic carbon transport protein-like protein                                                           | 2.2 | 3.3E-07 | 5.4E-06 | 1.5  | 2.1E-03 | 5.7E-02 |
| AT2G29360 | <i>AT2G29360</i> | NAD(P)-binding Rossmann-fold superfamily protein                                                          | 2.2 | 6.8E-08 | 1.4E-06 | 1.2  | 1.9E-01 | 5.3E-01 |
| AT1G16310 | <i>AT1G16310</i> | Cation efflux family protein                                                                              | 2.2 | 4.5E-08 | 9.6E-07 | 1.2  | 7.5E-02 | 3.5E-01 |
| AT1G64900 | <i>CYP89A2</i>   | cytochrome P450, family 89, subfamily A, polypeptide 2                                                    | 2.2 | 4.4E-04 | 2.5E-03 | 1.2  | 3.9E-01 | 7.2E-01 |
| AT3G04870 | <i>ZDS</i>       | zeta-carotene desaturase                                                                                  | 2.2 | 5.7E-10 | 2.2E-08 | 1.3  | 7.6E-03 | 1.1E-01 |
| AT4G11175 | <i>AT4G11175</i> | Nucleic acid-binding, OB-fold-like protein                                                                | 2.2 | 1.3E-06 | 1.8E-05 | 1.3  | 9.7E-02 | 4.0E-01 |
| AT4G37000 | <i>ACD2</i>      | accelerated cell death 2 (ACD2)                                                                           | 2.2 | 1.7E-09 | 6.0E-08 | 1.1  | 3.0E-01 | 6.5E-01 |
| AT2G42770 | <i>AT2G42770</i> | Peroxisomal membrane 22 kDa (Mpv17/PMP22) family protein                                                  | 2.2 | 9.8E-11 | 4.9E-09 | 1.3  | 1.2E-02 | 1.4E-01 |
| AT1G52510 | <i>AT1G52510</i> | alpha/beta-Hydrolases superfamily protein                                                                 | 2.2 | 1.1E-08 | 2.8E-07 | 1.3  | 7.1E-03 | 1.1E-01 |
| AT3G63140 | <i>CSP41A</i>    | chloroplast stem-loop binding protein of 41 kDa                                                           | 2.2 | 4.5E-08 | 9.6E-07 | 1.4  | 6.0E-03 | 1.0E-01 |
| AT1G48870 | <i>AT1G48870</i> | Transducin/WD40 repeat-like superfamily protein                                                           | 2.2 | 6.0E-05 | 4.6E-04 | 1.1  | 5.8E-01 | 8.3E-01 |
| AT5G62200 | <i>AT5G62200</i> | Embryo-specific protein 3, (ATS3)                                                                         | 2.2 | 7.1E-09 | 2.0E-07 | 1.1  | 5.9E-01 | 8.4E-01 |
| AT1G09850 | <i>XBCP3</i>     | xylem bark cysteine peptidase 3                                                                           | 2.2 | 1.1E-12 | 9.5E-11 | 1.0  | 7.1E-01 | 9.0E-01 |
| AT1G35515 | <i>HOS10</i>     | high response to osmotic stress 10                                                                        | 2.2 | 5.8E-05 | 4.5E-04 | 2.0  | 4.0E-04 | 2.1E-02 |
| AT4G34240 | <i>ALDH3I1</i>   | aldehyde dehydrogenase 3I1                                                                                | 2.2 | 7.2E-09 | 2.0E-07 | 1.1  | 1.9E-01 | 5.4E-01 |
| AT1G48850 | <i>EMB1144</i>   | chorismate synthase, putative / 5-enolpyruvylshikimate-3-phosphate phosphorylase                          | 2.2 | 4.2E-16 | 1.0E-13 | 1.2  | 7.6E-04 | 3.2E-02 |
| AT5G43750 | <i>PnsB5</i>     | NAD(P)H dehydrogenase 18                                                                                  | 2.2 | 1.0E-07 | 1.9E-06 | 1.4  | 7.0E-03 | 1.1E-01 |
| AT1G78290 | <i>SNRK2-8</i>   | Protein kinase superfamily protein                                                                        | 2.2 | 2.0E-09 | 6.7E-08 | -1.1 | 5.8E-01 | 8.4E-01 |
| AT2G40900 | <i>UMAMIT11</i>  | nodulin MtN21 /EamA-like transporter family protein                                                       | 2.2 | 2.5E-09 | 8.0E-08 | 1.3  | 2.1E-02 | 1.9E-01 |
| AT4G34730 | <i>AT4G34730</i> | ribosome-binding factor A family protein                                                                  | 2.2 | 1.8E-10 | 8.5E-09 | 1.3  | 6.2E-03 | 1.0E-01 |
| AT3G59120 | <i>AT3G59120</i> | Cysteine/Histidine-rich C1 domain family protein                                                          | 2.2 | 3.6E-04 | 2.1E-03 | 1.0  | 8.3E-01 | 9.5E-01 |
| AT5G56850 | <i>AT5G56850</i> | hypothetical protein                                                                                      | 2.2 | 3.2E-07 | 5.3E-06 | 1.3  | 3.9E-02 | 2.6E-01 |
| AT5G41050 | <i>AT5G41050</i> | Pollen Ole e 1 allergen and extensin family protein                                                       | 2.2 | 2.0E-06 | 2.5E-05 | -1.1 | 5.1E-01 | 7.9E-01 |
| AT5G26742 | <i>emb1138</i>   | DEAD box RNA helicase (RH3)                                                                               | 2.2 | 8.2E-09 | 2.2E-07 | 1.3  | 2.3E-02 | 2.0E-01 |
| AT5G24810 | <i>AT5G24810</i> | ABC1 family protein                                                                                       | 2.2 | 8.2E-13 | 7.5E-11 | 1.2  | 4.1E-02 | 2.6E-01 |
| AT2G23670 | <i>YCF37</i>     | homolog of Synechocystis YCF37                                                                            | 2.2 | 5.5E-10 | 2.2E-08 | 1.2  | 7.0E-02 | 3.4E-01 |
| AT2G34660 | <i>ABCC2</i>     | multidrug resistance-associated protein 2                                                                 | 2.2 | 9.8E-14 | 1.2E-11 | 1.7  | 3.1E-10 | 6.1E-07 |
| AT3G17130 | <i>AT3G17130</i> | Plant invertase/pectin methylesterase inhibitor superfamily protein                                       | 2.2 | 2.7E-03 | 1.1E-02 | -1.2 | 3.8E-01 | 7.1E-01 |
| AT4G14010 | <i>RALFL32</i>   | ralf-like 32                                                                                              | 2.1 | 9.4E-08 | 1.8E-06 | -1.1 | 6.3E-01 | 8.6E-01 |
| AT1G68660 | <i>AT1G68660</i> | Ribosomal protein L12/ ATP-dependent Clp protease adaptor protein ClpS family protein                     | 2.1 | 1.7E-11 | 1.1E-09 | 1.0  | 5.9E-01 | 8.4E-01 |
| AT5G38980 | <i>AT5G38980</i> | transmembrane protein                                                                                     | 2.1 | 9.5E-07 | 1.3E-05 | 1.5  | 4.7E-03 | 8.8E-02 |
| AT1G74730 | <i>AT1G74730</i> | transmembrane protein, putative (DUF1118)                                                                 | 2.1 | 2.5E-09 | 8.2E-08 | 1.3  | 1.4E-02 | 1.5E-01 |
| AT5G22090 | <i>AT5G22090</i> | FAF-like protein (DUF3049)                                                                                | 2.1 | 6.9E-06 | 7.4E-05 | 1.0  | 9.0E-01 | 9.8E-01 |
| AT5G61270 | <i>PIF7</i>      | phytochrome-interacting factor7                                                                           | 2.1 | 5.1E-07 | 7.9E-06 | -1.3 | 2.5E-02 | 2.1E-01 |
| AT4G34830 | <i>MRL1</i>      | Pentatricopeptide repeat (PPR) superfamily protein                                                        | 2.1 | 4.1E-07 | 6.6E-06 | 1.3  | 6.3E-02 | 3.2E-01 |
| AT2G41290 | <i>SSL2</i>      | strictosidine synthase-like 2                                                                             | 2.1 | 1.3E-06 | 1.8E-05 | 1.1  | 3.7E-01 | 7.0E-01 |
| AT5G49480 | <i>CP1</i>       | Ca2 -binding protein 1                                                                                    | 2.1 | 5.9E-11 | 3.1E-09 | 1.9  | 5.0E-09 | 5.1E-06 |
| AT3G57010 | <i>AT3G57010</i> | Calcium-dependent phosphotriesterase superfamily protein                                                  | 2.1 | 2.0E-08 | 4.7E-07 | 1.5  | 5.8E-04 | 2.6E-02 |
| AT3G48030 | <i>AT3G48030</i> | hypoxia-responsive family protein / zinc finger (C3HC4-type RING finger) family protein                   | 2.1 | 3.7E-10 | 1.5E-08 | -1.1 | 3.4E-01 | 6.8E-01 |
| AT3G12580 | <i>HSP70</i>     | heat shock protein 70                                                                                     | 2.1 | 6.5E-06 | 7.0E-05 | 1.2  | 2.4E-01 | 5.9E-01 |
| AT1G51440 | <i>AT1G51440</i> | alpha/beta-Hydrolases superfamily protein                                                                 | 2.1 | 1.4E-02 | 4.4E-02 | 1.1  | 8.4E-01 | 9.5E-01 |
| AT3G48700 | <i>CXE13</i>     | carboxyesterase 13                                                                                        | 2.1 | 5.2E-05 | 4.1E-04 | 1.0  | 8.2E-01 | 9.4E-01 |
| AT5G64840 | <i>ABCF5</i>     | general control non-repressible 5                                                                         | 2.1 | 5.1E-08 | 1.1E-06 | 1.2  | 5.7E-02 | 3.1E-01 |
| AT1G56510 | <i>WRR4</i>      | Disease resistance protein (TIR-NBS-LRR class)                                                            | 2.1 | 6.8E-10 | 2.6E-08 | 1.2  | 3.7E-02 | 2.5E-01 |
| AT2G21320 | <i>BBX18</i>     | B-box zinc finger family protein                                                                          | 2.1 | 7.5E-07 | 1.1E-05 | 1.2  | 2.5E-01 | 6.0E-01 |
| AT2G14660 | <i>AT2G14660</i> | thymocyte nuclear-like protein                                                                            | 2.1 | 5.9E-06 | 6.4E-05 | 1.2  | 2.1E-01 | 5.6E-01 |

|           |                    |                                                                                           |     |         |         |      |         |         |
|-----------|--------------------|-------------------------------------------------------------------------------------------|-----|---------|---------|------|---------|---------|
| AT1G33560 | <i>ADR1</i>        | Disease resistance protein (CC-NBS-LRR class)                                             | 2.1 | 7.2E-09 | 2.0E-07 | 1.2  | 5.3E-02 | 3.0E-01 |
| AT2G34630 | <i>GPS1</i>        | geranyl diphosphate synthase 1                                                            | 2.1 | 2.2E-14 | 3.0E-12 | 1.2  | 3.8E-03 | 7.7E-02 |
| AT5G48470 | <i>AT5G48470</i>   | hypothetical protein                                                                      | 2.1 | 1.6E-05 | 1.5E-04 | 1.2  | 3.5E-01 | 6.9E-01 |
| AT2G13360 | <i>AGT</i>         | alanine:glyoxylate aminotransferase                                                       | 2.1 | 5.3E-07 | 8.1E-06 | 1.2  | 2.3E-01 | 5.9E-01 |
| AT4G32590 | <i>AT4G32590</i>   | 2Fe-2S ferredoxin-like superfamily protein                                                | 2.1 | 1.2E-11 | 7.5E-10 | 1.2  | 9.4E-03 | 1.2E-01 |
| AT3G57180 | <i>BPG2</i>        | P-loop containing nucleoside triphosphate hydrolases superfamily protein                  | 2.1 | 5.1E-09 | 1.5E-07 | 1.3  | 1.3E-02 | 1.5E-01 |
| AT4G36430 | <i>AT4G36430</i>   | Peroxidase superfamily protein                                                            | 2.1 | 8.1E-03 | 2.7E-02 | 2.1  | 9.1E-03 | 1.2E-01 |
| AT5G45960 | <i>AT5G45960</i>   | GDSL-like Lipase/Acylhydrolase superfamily protein                                        | 2.1 | 1.3E-04 | 9.1E-04 | -1.4 | 6.0E-02 | 3.1E-01 |
| AT1G24600 | <i>AT1G24600</i>   | hypothetical protein                                                                      | 2.1 | 6.9E-03 | 2.4E-02 | -1.3 | 2.4E-01 | 5.9E-01 |
| AT3G49330 | <i>AT3G49330</i>   | Plant invertase/pectin methylesterase inhibitor superfamily protein                       | 2.1 | 6.8E-04 | 3.5E-03 | 1.2  | 3.4E-01 | 6.8E-01 |
| AT3G09162 | <i>AT3G09162</i>   | hypothetical protein                                                                      | 2.1 | 7.9E-06 | 8.2E-05 | 1.3  | 9.6E-02 | 3.9E-01 |
| AT1G70170 | <i>MMP</i>         | matrix metalloproteinase                                                                  | 2.1 | 2.3E-04 | 1.4E-03 | 1.3  | 1.3E-01 | 4.5E-01 |
| AT5G58870 | <i>ftsh9</i>       | FTSH protease 9                                                                           | 2.1 | 5.1E-10 | 2.1E-08 | 1.2  | 8.4E-02 | 3.7E-01 |
| AT2G16740 | <i>UBC29</i>       | ubiquitin-conjugating enzyme 29                                                           | 2.1 | 9.8E-06 | 9.9E-05 | -1.0 | 8.2E-01 | 9.4E-01 |
| AT1G26560 | <i>BGLU40</i>      | beta glucosidase 40                                                                       | 2.1 | 1.2E-08 | 3.2E-07 | 1.2  | 5.1E-02 | 2.9E-01 |
| AT1G19700 | <i>BEL10</i>       | BEL1-like homeodomain 10                                                                  | 2.1 | 4.2E-14 | 5.5E-12 | 1.1  | 3.4E-01 | 6.8E-01 |
| AT1G27360 | <i>SPL11</i>       | squamosa promoter-like 11                                                                 | 2.1 | 6.4E-08 | 1.3E-06 | 1.2  | 1.3E-01 | 4.5E-01 |
| AT3G09220 | <i>LAC7</i>        | laccase 7                                                                                 | 2.1 | 6.8E-07 | 1.0E-05 | 1.2  | 1.0E-01 | 4.1E-01 |
| AT4G19460 | <i>AT4G19460</i>   | UDP-Glycosyltransferase superfamily protein                                               | 2.1 | 1.1E-04 | 7.6E-04 | 1.2  | 3.6E-01 | 7.0E-01 |
| AT1G79270 | <i>ECT8</i>        | evolutionarily conserved C-terminal region 8                                              | 2.1 | 8.6E-12 | 5.7E-10 | 1.1  | 4.0E-01 | 7.3E-01 |
| AT3G59880 | <i>AT3G59880</i>   | hypothetical protein                                                                      | 2.1 | 3.3E-05 | 2.8E-04 | 1.2  | 3.2E-01 | 6.7E-01 |
| AT3G27170 | <i>CLC-B</i>       | chloride channel B                                                                        | 2.1 | 1.2E-06 | 1.6E-05 | 1.1  | 4.4E-01 | 7.5E-01 |
| AT2G43910 | <i>HOL1</i>        | HARMLESS TO OZONE LAYER 1                                                                 | 2.1 | 1.7E-13 | 1.9E-11 | 1.1  | 6.5E-02 | 3.3E-01 |
| AT3G23210 | <i>bHLH34</i>      | basic helix-loop-helix (bHLH) DNA-binding superfamily protein                             | 2.1 | 4.5E-08 | 9.6E-07 | 1.0  | 7.3E-01 | 9.1E-01 |
| AT3G25410 | <i>AT3G25410</i>   | Sodium Bile acid symporter family                                                         | 2.1 | 6.4E-11 | 3.4E-09 | 1.2  | 2.2E-02 | 1.9E-01 |
| AT3G22620 | <i>AT3G22620</i>   | Bifunctional inhibitor/lipid-transfer protein/seed storage 2S albumin superfamily protein | 2.1 | 6.6E-06 | 7.1E-05 | 1.6  | 2.3E-03 | 6.1E-02 |
| AT1G27480 | <i>AT1G27480</i>   | alpha/beta-Hydrolases superfamily protein                                                 | 2.1 | 7.7E-10 | 2.9E-08 | 1.4  | 2.1E-04 | 1.4E-02 |
| AT4G19830 | <i>AT4G19830</i>   | FKBP-like peptidyl-prolyl cis-trans isomerase family protein                              | 2.1 | 1.8E-09 | 6.1E-08 | 1.1  | 4.9E-01 | 7.8E-01 |
| AT2G41250 | <i>AT2G41250</i>   | Haloacid dehalogenase-like hydrolase (HAD) superfamily protein                            | 2.1 | 1.2E-11 | 8.0E-10 | 1.0  | 6.5E-01 | 8.7E-01 |
| AT1G18810 | <i>AT1G18810</i>   | phytochrome kinase substrate-like protein                                                 | 2.1 | 2.3E-06 | 2.9E-05 | -1.1 | 5.4E-01 | 8.1E-01 |
| AT3G06125 | <i>AT3G06125</i>   |                                                                                           | 2.1 | 1.2E-08 | 3.1E-07 | 1.0  | 7.6E-01 | 9.2E-01 |
| AT1G43160 | <i>RAP2.6</i>      | related to AP2 6                                                                          | 2.1 | 3.0E-04 | 1.8E-03 | 1.4  | 5.3E-02 | 3.0E-01 |
| AT5G43450 | <i>AT5G43450</i>   | 2-oxoglutarate (2OG) and Fe(II)-dependent oxygenase superfamily protein                   | 2.1 | 1.5E-05 | 1.4E-04 | 1.6  | 4.1E-03 | 8.0E-02 |
| AT3G02140 | <i>TMAC2</i>       | AFP2 (ABI five-binding protein 2) family protein                                          | 2.1 | 2.1E-10 | 9.4E-09 | -1.1 | 5.1E-01 | 7.9E-01 |
| AT1G73360 | <i>HDG11</i>       | homeodomain GLABROUS 11                                                                   | 2.1 | 4.8E-05 | 3.8E-04 | -1.2 | 3.0E-01 | 6.4E-01 |
| AT1G09300 | <i>AT1G09300</i>   | Metallopeptidase M24 family protein                                                       | 2.1 | 5.4E-08 | 1.1E-06 | 1.1  | 6.4E-01 | 8.7E-01 |
| AT5G62840 | <i>AT5G62840</i>   | Phosphoglycerate mutase family protein                                                    | 2.1 | 1.0E-07 | 1.9E-06 | 1.4  | 5.9E-03 | 9.9E-02 |
| AT3G18400 | <i>NAC058</i>      | NAC domain containing protein 58                                                          | 2.1 | 9.1E-04 | 4.5E-03 | 1.8  | 6.4E-03 | 1.0E-01 |
| AT3G05932 | <i>AT3G05932</i>   | Natural antisense transcript overlaps with AT3G05930                                      | 2.1 | 7.5E-08 | 1.5E-06 | -1.1 | 5.7E-01 | 8.3E-01 |
| AT1G11330 | <i>AT1G11330</i>   | S-locus lectin protein kinase family protein                                              | 2.1 | 1.0E-06 | 1.4E-05 | 1.1  | 3.6E-01 | 7.0E-01 |
| AT3G48520 | <i>CYP94B3</i>     | cytochrome P450, family 94, subfamily B, polypeptide 3                                    | 2.1 | 2.0E-06 | 2.6E-05 | 1.3  | 3.5E-02 | 2.4E-01 |
| AT3G18750 | <i>WNK6</i>        | with no lysine (K) kinase 6                                                               | 2.1 | 4.8E-09 | 1.4E-07 | 1.1  | 1.6E-01 | 4.9E-01 |
| AT5G36120 | <i>CCB3</i>        | cofactor assembly, complex C (B6F)                                                        | 2.1 | 2.6E-07 | 4.4E-06 | 1.3  | 2.5E-02 | 2.1E-01 |
| AT2G23540 | <i>AT2G23540</i>   | GDSL-like Lipase/Acylhydrolase superfamily protein                                        | 2.1 | 1.1E-02 | 3.5E-02 | 2.3  | 5.5E-03 | 9.5E-02 |
| AT1G64780 | <i>AMT1</i>        |                                                                                           | 2.1 | 8.8E-07 | 1.3E-05 | 1.5  | 4.0E-03 | 8.0E-02 |
| AT4G22890 | <i>PGR5-LIKE A</i> | PGR5-LIKE A                                                                               | 2.1 | 2.1E-06 | 2.7E-05 | 1.3  | 6.7E-02 | 3.3E-01 |
| AT4G08555 | <i>AT4G08555</i>   | hypothetical protein                                                                      | 2.1 | 1.5E-02 | 4.4E-02 | 2.3  | 7.9E-03 | 1.1E-01 |
| AT3G01660 | <i>AT3G01660</i>   | S-adenosyl-L-methionine-dependent methyltransferases superfamily protein                  | 2.1 | 8.5E-07 | 1.2E-05 | 1.3  | 3.8E-02 | 2.6E-01 |
| AT3G15360 | <i>TRX-M4</i>      | thioredoxin M-type 4                                                                      | 2.1 | 6.4E-10 | 2.5E-08 | 1.4  | 7.5E-04 | 3.1E-02 |
| AT5G21430 | <i>NdhU</i>        | Chaperone DnaJ-domain superfamily protein                                                 | 2.1 | 3.1E-08 | 7.1E-07 | 1.4  | 5.4E-03 | 9.4E-02 |
| AT3G55040 | <i>GSTL2</i>       | glutathione transferase lambda 2                                                          | 2.1 | 1.0E-08 | 2.7E-07 | 1.2  | 9.1E-02 | 3.8E-01 |
| AT5G17670 | <i>AT5G17670</i>   | alpha/beta-Hydrolases superfamily protein                                                 | 2.1 | 9.5E-08 | 1.8E-06 | 1.2  | 7.3E-02 | 3.5E-01 |
| AT3G49668 | <i>AT3G49668</i>   | Natural antisense transcript overlaps with AT3G49670                                      | 2.1 | 1.1E-02 | 3.4E-02 | 1.0  | 9.3E-01 | 9.8E-01 |
| AT4G21445 | <i>AT4G21445</i>   | receptor-interacting protein                                                              | 2.1 | 1.0E-05 | 1.0E-04 | 1.1  | 5.8E-01 | 8.4E-01 |
| AT5G57560 | <i>TCH4</i>        | Xyloglucan endotransglucosylase/hydrolase family protein                                  | 2.1 | 1.6E-02 | 4.8E-02 | -1.6 | 1.2E-01 | 4.3E-01 |
| AT5G03190 | <i>CPUORF47</i>    | peptide upstream protein                                                                  | 2.1 | 3.8E-13 | 3.9E-11 | 1.2  | 3.9E-03 | 7.9E-02 |
| AT5G41080 | <i>GDPD2</i>       | PLC-like phosphodiesterases superfamily protein                                           | 2.1 | 1.7E-07 | 3.1E-06 | -1.4 | 4.2E-03 | 8.2E-02 |
| AT4G27290 | <i>AT4G27290</i>   | S-locus lectin protein kinase family protein                                              | 2.1 | 1.6E-04 | 1.0E-03 | 1.2  | 2.3E-01 | 5.8E-01 |
| AT1G78995 | <i>AT1G78995</i>   | hypothetical protein                                                                      | 2.1 | 3.0E-07 | 5.0E-06 | 1.3  | 5.4E-02 | 3.0E-01 |
| AT5G09660 | <i>PMDH2</i>       | peroxisomal NAD-malate dehydrogenase 2                                                    | 2.1 | 3.7E-07 | 5.9E-06 | 1.3  | 5.2E-02 | 3.0E-01 |
| AT3G52880 | <i>MDAR1</i>       | monodehydroascorbate reductase 1                                                          | 2.1 | 1.6E-15 | 3.3E-13 | 1.1  | 2.1E-02 | 1.9E-01 |
| AT5G46490 | <i>AT5G46490</i>   | Disease resistance protein (TIR-NBS-LRR class) family                                     | 2.1 | 5.3E-08 | 1.1E-06 | 1.1  | 3.6E-01 | 7.0E-01 |
| AT2G31945 | <i>AT2G31945</i>   | transmembrane protein                                                                     | 2.1 | 2.2E-04 | 1.4E-03 | 1.7  | 8.1E-03 | 1.1E-01 |
| AT3G23580 | <i>RNR2A</i>       | ribonucleotide reductase 2A                                                               | 2.1 | 4.3E-12 | 3.2E-10 | 1.1  | 1.8E-01 | 5.2E-01 |
| AT4G03020 | <i>AT4G03020</i>   | transducin family protein / WD-40 repeat family protein                                   | 2.1 | 3.9E-15 | 6.9E-13 | 1.1  | 2.0E-01 | 5.5E-01 |
| AT1G43560 | <i>ty2</i>         | thioredoxin Y2                                                                            | 2.1 | 2.9E-07 | 4.9E-06 | 1.3  | 5.6E-02 | 3.1E-01 |
| AT1G23880 | <i>AT1G23880</i>   | NHL domain-containing protein                                                             | 2.1 | 3.5E-07 | 5.8E-06 | 1.1  | 5.5E-01 | 8.2E-01 |
| AT3G11090 | <i>LBD21</i>       | LOB domain-containing protein 21                                                          | 2.1 | 2.3E-06 | 2.9E-05 | 1.4  | 1.5E-02 | 1.6E-01 |
| AT1G64680 | <i>AT1G64680</i>   | beta-carotene isomerase D27                                                               | 2.1 | 3.1E-09 | 9.8E-08 | 1.2  | 7.7E-02 | 3.5E-01 |

|           |                  |                                                                          |     |         |         |      |         |         |
|-----------|------------------|--------------------------------------------------------------------------|-----|---------|---------|------|---------|---------|
| AT5G25890 | <i>IAA28</i>     | indole-3-acetic acid inducible 28                                        | 2.1 | 1.7E-09 | 5.8E-08 | 1.0  | 7.1E-01 | 9.0E-01 |
| AT5G17310 | <i>UGP2</i>      | UDP-glucose pyrophosphorylase 2                                          | 2.1 | 2.2E-10 | 1.0E-08 | 1.2  | 2.5E-02 | 2.1E-01 |
| AT1G77330 | <i>AT1G77330</i> | 2-oxoglutarate (2OG) and Fe(II)-dependent oxygenase superfamily protein  | 2.1 | 1.3E-05 | 1.2E-04 | 1.6  | 2.2E-03 | 5.8E-02 |
| AT4G01490 | <i>AT4G01490</i> | transposable_element_gene                                                | 2.1 | 1.4E-02 | 4.4E-02 | -1.1 | 7.3E-01 | 9.0E-01 |
| AT2G23672 | <i>AT2G23672</i> | Natural antisense transcript overlaps with AT2G23670                     | 2.1 | 1.9E-05 | 1.7E-04 | -1.0 | 9.1E-01 | 9.8E-01 |
| AT3G15520 | <i>AT3G15520</i> | Cyclophilin-like peptidyl-prolyl cis-trans isomerase family protein      | 2.1 | 5.4E-07 | 8.2E-06 | 1.2  | 1.4E-01 | 4.8E-01 |
| AT1G22630 | <i>AT1G22630</i> | SSUH2-like protein                                                       | 2.1 | 7.7E-10 | 2.9E-08 | 1.2  | 2.5E-02 | 2.0E-01 |
| AT3G44020 | <i>AT3G44020</i> | thylakoid lumenal P17.1 protein                                          | 2.1 | 4.6E-08 | 9.9E-07 | 1.3  | 2.7E-02 | 2.1E-01 |
| AT4G24930 | <i>AT4G24930</i> | thylakoid lumenal 17.9 kDa protein, chloroplast                          | 2.1 | 4.0E-08 | 8.7E-07 | 1.3  | 6.5E-03 | 1.0E-01 |
| AT3G05935 | <i>AT3G05935</i> | hypothetical protein                                                     | 2.1 | 1.9E-11 | 1.2E-09 | 1.0  | 9.4E-01 | 9.9E-01 |
| AT1G30680 | <i>AT1G30680</i> | toprim domain-containing protein                                         | 2.1 | 1.1E-09 | 4.1E-08 | 1.3  | 5.8E-03 | 9.9E-02 |
| AT3G50270 | <i>AT3G50270</i> | HXXXD-type acyl-transferase family protein                               | 2.1 | 1.9E-07 | 3.3E-06 | 1.4  | 6.2E-03 | 1.0E-01 |
| AT3G03770 | <i>AT3G03770</i> | Leucine-rich repeat protein kinase family protein                        | 2.1 | 1.5E-04 | 1.0E-03 | 1.3  | 9.2E-02 | 3.9E-01 |
| AT4G13550 | <i>AT4G13550</i> | putative triglyceride lipase                                             | 2.1 | 8.6E-10 | 3.2E-08 | 1.2  | 2.1E-02 | 1.9E-01 |
| AT4G23260 | <i>CRK18</i>     | cysteine-rich RLK (RECEPTOR-like protein kinase) 18                      | 2.1 | 1.1E-04 | 7.8E-04 | -1.0 | 9.8E-01 | 1.0E+00 |
| AT4G27940 | <i>MTM1</i>      | manganese tracking factor for mitochondrial SOD2                         | 2.1 | 7.6E-08 | 1.5E-06 | 1.1  | 2.6E-01 | 6.1E-01 |
| AT2G24120 | <i>SCA3</i>      | DNA/RNA polymerases superfamily protein                                  | 2.1 | 6.5E-09 | 1.9E-07 | 1.2  | 5.0E-02 | 2.9E-01 |
| AT4G04020 | <i>FIB</i>       | fibrillin                                                                | 2.1 | 3.9E-08 | 8.5E-07 | 1.1  | 3.9E-01 | 7.2E-01 |
| AT2G29290 | <i>AT2G29290</i> | NAD(P)-binding Rossmann-fold superfamily protein                         | 2.1 | 4.7E-05 | 3.7E-04 | 1.2  | 3.2E-01 | 6.7E-01 |
| AT5G34850 | <i>PAP26</i>     | purple acid phosphatase 26                                               | 2.1 | 1.5E-12 | 1.3E-10 | -1.1 | 2.3E-01 | 5.8E-01 |
| AT5G10730 | <i>AT5G10730</i> | NAD(P)-binding Rossmann-fold superfamily protein                         | 2.1 | 2.4E-12 | 1.9E-10 | -1.1 | 3.2E-01 | 6.6E-01 |
| AT3G14420 | <i>GOX1</i>      | Aldolase-type TIM barrel family protein                                  | 2.1 | 1.7E-06 | 2.3E-05 | 1.3  | 5.5E-02 | 3.0E-01 |
| AT1G23390 | <i>AT1G23390</i> | Kelch repeat-containing F-box family protein                             | 2.1 | 1.6E-08 | 4.0E-07 | 1.3  | 2.1E-02 | 1.9E-01 |
| AT3G12930 | <i>AT3G12930</i> | Lojap-related protein                                                    | 2.1 | 1.5E-08 | 3.7E-07 | 1.2  | 1.5E-01 | 4.9E-01 |
| AT1G54500 | <i>AT1G54500</i> | Rubredoxin-like superfamily protein                                      | 2.1 | 8.5E-08 | 1.7E-06 | 1.2  | 9.9E-02 | 4.0E-01 |
| AT5G01840 | <i>OFF1</i>      | ovate family protein 1                                                   | 2.1 | 5.3E-06 | 5.9E-05 | -1.2 | 2.2E-01 | 5.7E-01 |
| AT2G43140 | <i>AT2G43140</i> | basic helix-loop-helix (bHLH) DNA-binding superfamily protein            | 2.1 | 3.5E-03 | 1.4E-02 | 1.2  | 5.2E-01 | 8.0E-01 |
| AT5G41590 | <i>AT5G41590</i> | LURP-one-like protein (DUF567)                                           | 2.1 | 3.7E-03 | 1.4E-02 | 1.2  | 5.2E-01 | 8.0E-01 |
| AT4G37925 | <i>NdhM</i>      | subunit NDH-M of NAD(P)H:plastoquinone dehydrogenase complex             | 2.1 | 3.2E-07 | 5.3E-06 | 1.2  | 1.4E-01 | 4.6E-01 |
| AT5G28750 | <i>AT5G28750</i> | Bacterial sec-independent translocation protein mttA/Hcf106              | 2.1 | 4.1E-10 | 1.7E-08 | 1.2  | 1.9E-02 | 1.8E-01 |
| AT5G49910 | <i>cpHsc70-2</i> | chloroplast heat shock protein 70-2                                      | 2.1 | 7.2E-11 | 3.7E-09 | 1.3  | 8.1E-04 | 3.3E-02 |
| AT1G30360 | <i>ERD4</i>      | Early-responsive to dehydration stress protein (ERD4)                    | 2.1 | 3.8E-09 | 1.2E-07 | -1.0 | 7.8E-01 | 9.3E-01 |
| AT2G01850 | <i>EXGT-A3</i>   | endoxyloglucan transferase A3                                            | 2.1 | 6.4E-13 | 6.1E-11 | -1.0 | 5.4E-01 | 8.1E-01 |
| AT5G57180 | <i>CIA2</i>      | chloroplast import apparatus 2                                           | 2.0 | 1.3E-08 | 3.4E-07 | -1.0 | 7.6E-01 | 9.2E-01 |
| AT3G03990 | <i>AT3G03990</i> | alpha/beta-Hydrolases superfamily protein                                | 2.0 | 1.8E-14 | 2.5E-12 | 1.0  | 4.3E-01 | 7.5E-01 |
| AT5G59720 | <i>HSP18.2</i>   | heat shock protein 18.2                                                  | 2.0 | 6.7E-05 | 5.1E-04 | -1.1 | 4.8E-01 | 7.7E-01 |
| AT1G18710 | <i>MYB47</i>     | myb domain protein 47                                                    | 2.0 | 1.3E-03 | 6.2E-03 | 1.6  | 1.6E-02 | 1.6E-01 |
| AT4G20360 | <i>RABE1b</i>    | RAB GTPase homolog E1B                                                   | 2.0 | 3.7E-07 | 5.9E-06 | 1.3  | 2.1E-02 | 1.9E-01 |
| AT4G17360 | <i>AT4G17360</i> | Formyl transferase                                                       | 2.0 | 5.0E-06 | 5.6E-05 | 1.2  | 1.3E-01 | 4.5E-01 |
| AT1G69870 | <i>NRT1.7</i>    | nitrate transporter 1.7                                                  | 2.0 | 2.5E-05 | 2.2E-04 | 1.8  | 4.4E-04 | 2.2E-02 |
| AT2G42130 | <i>AT2G42130</i> | Plastid-lipid associated protein PAP / fibrillin family protein          | 2.0 | 5.4E-10 | 2.1E-08 | 1.1  | 1.3E-01 | 4.5E-01 |
| AT5G28500 | <i>AT5G28500</i> | rubisco accumulation factor-like protein                                 | 2.0 | 5.2E-08 | 1.1E-06 | 1.3  | 6.8E-03 | 1.1E-01 |
| AT1G03905 | <i>ABC119</i>    | P-loop containing nucleoside triphosphate hydrolases superfamily protein | 2.0 | 5.1E-08 | 1.1E-06 | 1.1  | 3.8E-01 | 7.1E-01 |
| AT1G74650 | <i>MYB31</i>     | myb domain protein 31                                                    | 2.0 | 8.1E-04 | 4.1E-03 | -1.1 | 7.2E-01 | 9.0E-01 |
| AT3G54990 | <i>SMZ</i>       | Integrase-type DNA-binding superfamily protein                           | 2.0 | 6.4E-10 | 2.5E-08 | 1.1  | 1.7E-01 | 5.1E-01 |
| AT4G26860 | <i>AT4G26860</i> | Putative pyridoxal phosphate-dependent enzyme, YBL036C type              | 2.0 | 1.6E-11 | 1.0E-09 | 1.1  | 2.1E-01 | 5.6E-01 |
| AT5G54770 | <i>THI1</i>      | thiazole biosynthetic enzyme, chloroplast (ARA6) (THI1) (THI4)           | 2.0 | 2.5E-06 | 3.2E-05 | 1.2  | 1.3E-01 | 4.5E-01 |
| AT4G21860 | <i>MSRB2</i>     | methionine sulfoxide reductase B 2                                       | 2.0 | 2.7E-13 | 2.9E-11 | 1.1  | 2.7E-01 | 6.2E-01 |
| AT2G22360 | <i>AT2G22360</i> | DNAJ heat shock family protein                                           | 2.0 | 3.1E-11 | 1.8E-09 | 1.3  | 5.1E-04 | 2.4E-02 |
| AT5G02940 | <i>AT5G02940</i> | ion channel POLLUX-like protein, putative (DUF1012)                      | 2.0 | 2.5E-07 | 4.3E-06 | 1.4  | 5.3E-03 | 9.4E-02 |
| AT3G52605 | <i>AT3G52605</i> | Natural antisense transcript overlaps with AT3G52610                     | 2.0 | 1.1E-05 | 1.1E-04 | -1.2 | 1.6E-01 | 5.0E-01 |
| AT1G21110 | <i>IGMT3</i>     | O-methyltransferase family protein                                       | 2.0 | 1.9E-04 | 1.2E-03 | -1.3 | 9.5E-02 | 3.9E-01 |
| AT5G49970 | <i>PPOX</i>      | pyridoxin (pyridoxamine) 5'-phosphate oxidase                            | 2.0 | 1.8E-12 | 1.5E-10 | 1.1  | 1.1E-01 | 4.2E-01 |
| AT1G19150 | <i>Lhca6</i>     | PSI type II chlorophyll a/b-binding protein                              | 2.0 | 8.0E-07 | 1.2E-05 | 1.5  | 1.3E-03 | 4.3E-02 |
| AT3G53830 | <i>AT3G53830</i> | Regulator of chromosome condensation (RCC1) family protein               | 2.0 | 5.9E-05 | 4.5E-04 | 1.1  | 5.0E-01 | 7.8E-01 |
| AT3G62030 | <i>ROC4</i>      | rotamase CYP 4                                                           | 2.0 | 6.9E-05 | 5.2E-04 | 1.4  | 3.4E-02 | 2.4E-01 |
| AT3G49760 | <i>bZIP5</i>     | basic leucine-zipper 5                                                   | 2.0 | 2.1E-03 | 8.9E-03 | 1.2  | 3.8E-01 | 7.1E-01 |
| AT1G26600 | <i>CLE9</i>      | CLAVATA3/ESR-RELATED 9                                                   | 2.0 | 3.6E-03 | 1.4E-02 | -1.1 | 8.3E-01 | 9.5E-01 |
| AT4G39970 | <i>AT4G39970</i> | Haloacid dehalogenase-like hydrolase (HAD) superfamily protein           | 2.0 | 2.7E-06 | 3.3E-05 | 1.2  | 1.0E-01 | 4.0E-01 |
| AT3G27050 | <i>AT3G27050</i> | plant/protein                                                            | 2.0 | 7.6E-08 | 1.5E-06 | 1.0  | 7.5E-01 | 9.2E-01 |
| AT3G43600 | <i>AAO2</i>      | aldehyde oxidase 2                                                       | 2.0 | 2.3E-11 | 1.4E-09 | 1.3  | 1.7E-03 | 5.0E-02 |
| AT5G44005 | <i>AT5G44005</i> | hypothetical protein                                                     | 2.0 | 7.7E-05 | 5.7E-04 | -1.6 | 9.0E-03 | 1.2E-01 |
| AT5G49030 | <i>OVA2</i>      | tRNA synthetase class I (I, L, M and V) family                           | 2.0 | 1.1E-07 | 2.1E-06 | 1.4  | 6.6E-03 | 1.0E-01 |
| AT1G11860 | <i>AT1G11860</i> | Glycine cleavage T-protein family                                        | 2.0 | 7.7E-08 | 1.5E-06 | 1.4  | 4.5E-03 | 8.6E-02 |
| AT1G05540 | <i>AT1G05540</i> | hypothetical protein (DUF295)                                            | 2.0 | 1.6E-03 | 7.1E-03 | 1.1  | 5.7E-01 | 8.3E-01 |
| AT1G62960 | <i>ACS10</i>     | ACC synthase 10                                                          | 2.0 | 2.9E-10 | 1.3E-08 | 1.1  | 2.1E-01 | 5.5E-01 |
| AT3G11945 | <i>HST</i>       | homogentisate prenyltransferase                                          | 2.0 | 1.1E-05 | 1.1E-04 | 1.2  | 1.8E-01 | 5.2E-01 |
| AT5G09590 | <i>MTHSC70-2</i> | mitochondrial HSO70 2                                                    | 2.0 | 8.9E-09 | 2.4E-07 | 1.4  | 1.9E-03 | 5.3E-02 |

|           |                  |                                                                          |     |         |         |      |         |         |
|-----------|------------------|--------------------------------------------------------------------------|-----|---------|---------|------|---------|---------|
| AT2G16500 | <i>ADC1</i>      | arginine decarboxylase 1                                                 | 2.0 | 8.2E-09 | 2.2E-07 | 1.1  | 2.5E-01 | 6.0E-01 |
| AT1G01790 | <i>KEA1</i>      | K efflux antiporter 1                                                    | 2.0 | 9.1E-07 | 1.3E-05 | 1.3  | 4.9E-02 | 2.9E-01 |
| AT1G48100 | <i>AT1G48100</i> | Pectin lyase-like superfamily protein                                    | 2.0 | 9.5E-07 | 1.3E-05 | 1.6  | 6.8E-04 | 2.9E-02 |
| AT4G03280 | <i>PETC</i>      | photosynthetic electron transfer C                                       | 2.0 | 8.6E-08 | 1.7E-06 | 1.4  | 5.7E-03 | 9.7E-02 |
| AT1G45191 | <i>BGLU1</i>     | Glycosyl hydrolase superfamily protein                                   | 2.0 | 5.8E-04 | 3.1E-03 | -1.0 | 8.0E-01 | 9.4E-01 |
| AT5G47610 | <i>AT5G47610</i> | RING/U-box superfamily protein                                           | 2.0 | 8.0E-07 | 1.2E-05 | -1.1 | 3.3E-01 | 6.7E-01 |
| AT1G28815 | <i>AT1G28815</i> | hypothetical protein                                                     | 2.0 | 6.6E-04 | 3.5E-03 | -1.0 | 9.0E-01 | 9.7E-01 |
| AT1G72620 | <i>AT1G72620</i> | alpha/beta-Hydrolases superfamily protein                                | 2.0 | 7.8E-03 | 2.7E-02 | 1.2  | 5.4E-01 | 8.1E-01 |
| AT3G12345 | <i>AT3G12345</i> | FKBP-type peptidyl-prolyl cis-trans isomerase                            | 2.0 | 2.2E-08 | 5.1E-07 | 1.3  | 2.3E-02 | 2.0E-01 |
| AT4G31390 | <i>ACDO1</i>     | Protein kinase superfamily protein                                       | 2.0 | 9.4E-08 | 1.8E-06 | 1.2  | 1.2E-01 | 4.4E-01 |
| AT2G30100 | <i>AT2G30100</i> | pentatricopeptide (PPR) repeat-containing protein                        | 2.0 | 3.0E-11 | 1.7E-09 | 1.0  | 7.9E-01 | 9.3E-01 |
| AT3G01180 | <i>SS2</i>       | starch synthase 2                                                        | 2.0 | 3.7E-11 | 2.1E-09 | 1.2  | 2.2E-02 | 2.0E-01 |
| AT3G52370 | <i>FLA15</i>     | FASCICLIN-like arabinogalactan protein 15                                | 2.0 | 5.6E-05 | 4.3E-04 | 1.3  | 1.4E-01 | 4.8E-01 |
| AT5G44490 | <i>AT5G44490</i> | FBD, F-box, Skp2-like and Leucine Rich Repeat domains containing protein | 2.0 | 6.0E-04 | 3.2E-03 | 1.2  | 4.5E-01 | 7.5E-01 |
| AT1G43675 | <i>AT1G43675</i> | transposable_element_gene                                                | 2.0 | 9.0E-03 | 3.0E-02 | -1.0 | 9.1E-01 | 9.8E-01 |
| AT5G41315 | <i>GL3</i>       | basic helix-loop-helix (bHLH) DNA-binding superfamily protein            | 2.0 | 1.8E-03 | 8.0E-03 | 1.3  | 1.7E-01 | 5.1E-01 |
| AT4G17810 | <i>AT4G17810</i> | C2H2 and C2HC zinc fingers superfamily protein                           | 2.0 | 3.8E-07 | 6.0E-06 | 1.1  | 5.6E-01 | 8.2E-01 |
| AT2G17695 | <i>AT2G17695</i> | outer envelope protein                                                   | 2.0 | 7.5E-09 | 2.1E-07 | 1.2  | 2.3E-02 | 2.0E-01 |
| AT4G27830 | <i>BGLU10</i>    | beta glucosidase 10                                                      | 2.0 | 1.2E-07 | 2.3E-06 | 1.5  | 5.4E-04 | 2.5E-02 |
| AT1G42550 | <i>PMI1</i>      | plastid movement impaired1                                               | 2.0 | 8.0E-09 | 2.2E-07 | 1.1  | 2.3E-01 | 5.8E-01 |
| AT1G79470 | <i>AT1G79470</i> | Aldolase-type TIM barrel family protein                                  | 2.0 | 1.4E-05 | 1.3E-04 | 1.4  | 1.6E-02 | 1.6E-01 |
| AT5G10150 | <i>AT5G10150</i> | UPSTREAM OF FLC protein (DUF966)                                         | 2.0 | 1.1E-06 | 1.6E-05 | -1.0 | 8.2E-01 | 9.4E-01 |
| AT2G33850 | <i>AT2G33850</i> | E6-like protein                                                          | 2.0 | 5.2E-04 | 2.8E-03 | 1.2  | 3.0E-01 | 6.5E-01 |
| AT3G56160 | <i>AT3G56160</i> | Sodium Bile acid symporter family                                        | 2.0 | 5.1E-07 | 7.9E-06 | 1.2  | 8.3E-02 | 3.6E-01 |
| AT1G16320 | <i>AT1G16320</i> | plant/protein (DUF2358)                                                  | 2.0 | 3.8E-08 | 8.4E-07 | 1.1  | 1.7E-01 | 5.1E-01 |
| AT1G04350 | <i>AT1G04350</i> | 2-oxoglutarate (2OG) and Fe(II)-dependent oxygenase superfamily protein  | 2.0 | 9.6E-08 | 1.8E-06 | 1.3  | 2.0E-02 | 1.8E-01 |
| AT1G51805 | <i>AT1G51805</i> | Leucine-rich repeat protein kinase family protein                        | 2.0 | 6.0E-06 | 6.5E-05 | -1.0 | 9.2E-01 | 9.8E-01 |
| AT5G59050 | <i>AT5G59050</i> | G patch domain protein                                                   | 2.0 | 7.4E-06 | 7.8E-05 | 1.1  | 5.0E-01 | 7.8E-01 |

| <i>uvr8</i> UV/WL Up |                  |                                                                                           | Col UV/WL    |         |                 | <i>uvr8</i> UV/WL     |         |                 |
|----------------------|------------------|-------------------------------------------------------------------------------------------|--------------|---------|-----------------|-----------------------|---------|-----------------|
| AGI                  | gene             | description                                                                               | Col_UV/WL_FC | pvalue  | pvalue_with_FDR | <i>uvr8</i> _UV/WL_FC | pvalue  | pvalue_with_FDR |
| AT5G66700            | <i>HB53</i>      | homeobox 53                                                                               | 3.3          | 5.9E-02 | 1.3E-01         | 38.1                  | 1.8E-03 | 5.1E-02         |
| AT1G03880            | <i>CRU2</i>      | cruciferin 2                                                                              | -33.3        | 6.5E-02 | 1.4E-01         | 24.6                  | 7.1E-04 | 3.0E-02         |
| AT1G21250            | <i>WAK1</i>      | cell wall-associated kinase                                                               | 2.6          | 2.5E-02 | 6.7E-02         | 13.1                  | 4.1E-06 | 8.3E-04         |
| AT4G27160            | <i>SESA3</i>     | seed storage albumin 3                                                                    | -2.7         | 3.4E-01 | 5.0E-01         | 11.2                  | 1.4E-03 | 4.6E-02         |
| AT5G59310            | <i>LTP4</i>      | lipid transfer protein 4                                                                  | 2.1          | 2.4E-01 | 3.9E-01         | 8.0                   | 1.5E-03 | 4.7E-02         |
| AT1G11920            | <i>AT1G11920</i> | Pectin lyase-like superfamily protein                                                     | 3.2          | 1.9E-02 | 5.4E-02         | 4.6                   | 7.6E-04 | 3.2E-02         |
| AT1G76470            | <i>AT1G76470</i> | NAD(P)-binding Rossmann-fold superfamily protein                                          | 1.8          | 1.1E-01 | 2.2E-01         | 4.3                   | 6.8E-05 | 6.4E-03         |
| AT1G49570            | <i>AT1G49570</i> | Peroxidase superfamily protein                                                            | -1.3         | 5.6E-01 | 7.0E-01         | 4.2                   | 7.3E-04 | 3.1E-02         |
| AT3G23240            | <i>ERF1</i>      | ethylene response factor 1                                                                | 1.7          | 2.2E-01 | 3.6E-01         | 4.1                   | 3.6E-04 | 2.0E-02         |
| AT2G37870            | <i>AT2G37870</i> | Bifunctional inhibitor/lipid-transfer protein/seed storage 2S albumin superfamily protein | 1.1          | 6.1E-01 | 7.3E-01         | 4.0                   | 2.6E-11 | 1.1E-07         |
| AT2G46495            | <i>AT2G46495</i> | RING/U-box superfamily protein                                                            | 2.0          | 7.6E-02 | 1.6E-01         | 3.8                   | 2.3E-04 | 1.5E-02         |
| AT4G29550            | <i>AT4G29550</i> | hypothetical protein (DUF626)                                                             | -1.5         | 1.6E-01 | 2.8E-01         | 3.8                   | 5.4E-05 | 5.4E-03         |
| AT4G23700            | <i>CHX17</i>     | cation/H exchanger 17                                                                     | -1.4         | 9.0E-02 | 1.8E-01         | 3.6                   | 1.9E-07 | 8.6E-05         |
| AT1G28650            | <i>AT1G28650</i> | GDSL-like Lipase/Acylhydrolase superfamily protein                                        | -1.9         | 2.9E-01 | 4.4E-01         | 3.3                   | 1.1E-03 | 4.0E-02         |
| AT2G18193            | <i>AT2G18193</i> | P-loop containing nucleoside triphosphate hydrolases superfamily protein                  | 1.3          | 2.5E-01 | 3.9E-01         | 3.2                   | 1.6E-05 | 2.3E-03         |
| AT5G59320            | <i>LTP3</i>      | lipid transfer protein 3                                                                  | 1.4          | 3.2E-01 | 4.7E-01         | 3.2                   | 5.0E-04 | 2.4E-02         |
| AT1G05680            | <i>UGT74E2</i>   | Uridine diphosphate glycosyltransferase 74E2                                              | 1.3          | 2.1E-01 | 3.5E-01         | 3.1                   | 6.3E-07 | 2.2E-04         |
| AT4G13420            | <i>HAK5</i>      | high affinity K transporter 5                                                             | 2.4          | 2.4E-02 | 6.5E-02         | 3.1                   | 9.9E-04 | 3.6E-02         |
| AT2G19190            | <i>FRK1</i>      | FLG22-induced receptor-like kinase 1                                                      | -1.2         | 5.9E-01 | 7.2E-01         | 3.1                   | 2.3E-04 | 1.5E-02         |
| AT3G53510            | <i>ABCG20</i>    | ABC-2 type transporter family protein                                                     | 1.9          | 1.1E-02 | 3.4E-02         | 3.0                   | 4.6E-05 | 5.0E-03         |
| AT2G31180            | <i>MYB14</i>     | myb domain protein 14                                                                     | 1.0          | 9.2E-01 | 9.6E-01         | 3.0                   | 2.8E-06 | 6.2E-04         |
| AT5G28520            | <i>AT5G28520</i> | Mannose-binding lectin superfamily protein                                                | 1.3          | 5.2E-01 | 6.6E-01         | 3.0                   | 1.7E-03 | 5.0E-02         |
| AT4G21070            | <i>BRCA1</i>     | breast cancer susceptibility1                                                             | 1.9          | 2.5E-05 | 2.2E-04         | 3.0                   | 2.0E-10 | 4.9E-07         |
| AT2G15490            | <i>UGT73B4</i>   | UDP-glycosyltransferase 73B4                                                              | 1.3          | 2.3E-01 | 3.7E-01         | 2.9                   | 5.6E-06 | 1.1E-03         |
| AT1G66700            | <i>PXMT1</i>     | S-adenosyl-L-methionine-dependent methyltransferases superfamily protein                  | -2.1         | 3.5E-02 | 8.8E-02         | 2.9                   | 1.3E-04 | 9.9E-03         |
| AT4G34135            | <i>UGT73B2</i>   | UDP-glucosyltransferase 73B2                                                              | 1.8          | 3.5E-07 | 5.7E-06         | 2.8                   | 1.2E-12 | 1.3E-08         |
| AT1G17170            | <i>GSTU24</i>    | glutathione S-transferase TAU 24                                                          | 1.5          | 2.4E-02 | 6.5E-02         | 2.8                   | 1.4E-07 | 6.5E-05         |
| AT3G28740            | <i>CYP81D11</i>  | Cytochrome P450 superfamily protein                                                       | 1.1          | 2.2E-01 | 3.6E-01         | 2.7                   | 1.3E-11 | 7.0E-08         |
| AT1G60750            | <i>AT1G60750</i> | NAD(P)-linked oxidoreductase superfamily protein                                          | -1.1         | 7.2E-01 | 8.2E-01         | 2.7                   | 2.2E-04 | 1.4E-02         |
| AT1G17180            | <i>GSTU25</i>    | glutathione S-transferase TAU 25                                                          | 1.1          | 5.4E-01 | 6.8E-01         | 2.7                   | 1.5E-05 | 2.2E-03         |
| AT4G34131            | <i>UGT73B3</i>   | UDP-glucosyl transferase 73B3                                                             | 1.9          | 5.4E-05 | 4.2E-04         | 2.6                   | 3.6E-08 | 2.4E-05         |
| AT4G16260            | <i>AT4G16260</i> | Glycosyl hydrolase superfamily protein                                                    | 1.7          | 1.1E-02 | 3.6E-02         | 2.5                   | 3.4E-05 | 3.9E-03         |
| AT2G39980            | <i>AT2G39980</i> | HXXXD-type acyl-transferase family protein                                                | -1.1         | 7.6E-01 | 8.5E-01         | 2.5                   | 1.4E-04 | 1.1E-02         |
| AT4G35190            | <i>LOG5</i>      | Putative lysine decarboxylase family protein                                              | -1.1         | 7.0E-01 | 8.0E-01         | 2.5                   | 7.3E-06 | 1.3E-03         |
| AT2G05380            | <i>GRP35</i>     | glycine-rich protein 3 short isoform                                                      | -1.1         | 5.6E-01 | 6.9E-01         | 2.5                   | 3.5E-08 | 2.4E-05         |
| AT5G10990            | <i>AT5G10990</i> | SAUR-like auxin-responsive protein family                                                 | 1.1          | 7.4E-01 | 8.3E-01         | 2.5                   | 9.9E-04 | 3.6E-02         |
| AT2G29420            | <i>GSTU7</i>     | glutathione S-transferase tau 7                                                           | 1.8          | 1.0E-07 | 1.9E-06         | 2.4                   | 1.8E-12 | 1.3E-08         |
| AT2G29480            | <i>GSTU2</i>     | glutathione S-transferase tau 2                                                           | 1.5          | 2.0E-02 | 5.7E-02         | 2.4                   | 2.0E-06 | 4.9E-04         |
| AT3G02940            | <i>MYB107</i>    | myb domain protein 107                                                                    | 1.4          | 1.4E-01 | 2.5E-01         | 2.3                   | 7.9E-04 | 3.3E-02         |
| AT3G27630            | <i>AT3G27630</i> | cyclin-dependent kinase inhibitor SMR3-like protein                                       | 1.6          | 6.6E-02 | 1.4E-01         | 2.3                   | 5.8E-04 | 2.6E-02         |
| AT4G22530            | <i>AT4G22530</i> | S-adenosyl-L-methionine-dependent methyltransferases superfamily protein                  | -1.2         | 2.8E-01 | 4.2E-01         | 2.3                   | 9.6E-08 | 5.1E-05         |
| AT4G33550            | <i>AT4G33550</i> | Bifunctional inhibitor/lipid-transfer protein/seed storage 2S albumin superfamily protein | 1.1          | 5.3E-01 | 6.7E-01         | 2.3                   | 4.0E-04 | 2.1E-02         |
| AT4G03140            | <i>AT4G03140</i> | NAD(P)-binding Rossmann-fold superfamily protein                                          | 1.6          | 9.8E-03 | 3.2E-02         | 2.2                   | 2.7E-05 | 3.4E-03         |
| AT5G06860            | <i>PGIP1</i>     | polygalacturonase inhibiting protein 1                                                    | 1.7          | 3.4E-02 | 8.6E-02         | 2.2                   | 1.3E-03 | 4.2E-02         |

|           |                  |                                                                           |      |         |         |     |         |         |
|-----------|------------------|---------------------------------------------------------------------------|------|---------|---------|-----|---------|---------|
| AT3G44540 | <i>FAR4</i>      | fatty acid reductase 4                                                    | 1.4  | 1.2E-01 | 2.2E-01 | 2.2 | 3.3E-04 | 1.8E-02 |
| AT2G47550 | <i>AT2G47550</i> | Plant invertase/pectin methylesterase inhibitor superfamily               | 1.7  | 1.7E-02 | 5.0E-02 | 2.2 | 2.5E-04 | 1.5E-02 |
| AT1G79410 |                  | organic cation/carnitine transporter5                                     | 1.9  | 1.1E-06 | 1.5E-05 | 2.2 | 1.4E-08 | 1.1E-05 |
| AT5G63790 | <i>NAC102</i>    | NAC domain containing protein 102                                         | 1.7  | 3.5E-09 | 1.1E-07 | 2.1 | 1.1E-12 | 1.3E-08 |
| AT2G29490 | <i>GSTU1</i>     | glutathione S-transferase TAU 1                                           | 1.6  | 6.8E-04 | 3.5E-03 | 2.1 | 2.9E-07 | 1.2E-04 |
| AT3G25730 | <i>EDF3</i>      | ethylene response DNA binding factor 3                                    | 1.2  | 2.4E-01 | 3.8E-01 | 2.1 | 9.6E-05 | 8.0E-03 |
| AT1G65690 | <i>AT1G65690</i> | Late embryogenesis abundant (LEA) hydroxyproline-rich glycoprotein family | 1.9  | 7.1E-05 | 5.3E-04 | 2.1 | 4.2E-06 | 8.5E-04 |
| AT1G76680 | <i>OPR1</i>      | 12-oxophytodienoate reductase 1                                           | 1.5  | 6.4E-03 | 2.3E-02 | 2.1 | 1.2E-05 | 1.9E-03 |
| AT3G06390 | <i>AT3G06390</i> | Uncharacterized protein family (UPF0497)                                  | 1.8  | 8.1E-03 | 2.7E-02 | 2.1 | 1.4E-03 | 4.5E-02 |
| AT4G13300 | <i>TPS13</i>     | terpenoid synthase 13                                                     | 1.1  | 8.2E-01 | 8.9E-01 | 2.1 | 1.5E-03 | 4.7E-02 |
| AT3G49960 | <i>AT3G49960</i> | Peroxidase superfamily protein                                            | 1.7  | 1.3E-02 | 3.9E-02 | 2.1 | 1.1E-03 | 3.9E-02 |
| AT3G59220 | <i>PRN</i>       | pirin                                                                     | -1.0 | 8.5E-01 | 9.1E-01 | 2.1 | 1.1E-05 | 1.7E-03 |
| AT3G48920 | <i>MYB45</i>     | myb domain protein 45                                                     | 1.3  | 2.1E-01 | 3.5E-01 | 2.0 | 7.0E-04 | 3.0E-02 |
| AT3G17110 | <i>AT3G17110</i> | pseudogene of glycine-rich protein                                        | 1.5  | 1.1E-02 | 3.5E-02 | 2.0 | 7.6E-05 | 6.8E-03 |
| AT1G55920 | <i>SERAT2</i>    |                                                                           | 1.5  | 8.0E-05 | 5.8E-04 | 2.0 | 1.5E-09 | 2.0E-06 |
| AT3G44300 | <i>NIT2</i>      | nitrilase 2                                                               | -1.0 | 8.5E-01 | 9.1E-01 | 2.0 | 8.5E-04 | 3.4E-02 |
| AT1G02920 | <i>GSTF7</i>     | glutathione S-transferase 7                                               | -1.4 | 7.0E-02 | 1.5E-01 | 2.0 | 3.8E-04 | 2.0E-02 |
| AT2G35770 | <i>scpl28</i>    | serine carboxypeptidase-like 28                                           | 2.0  | 4.2E-05 | 3.4E-04 | 2.0 | 4.4E-05 | 4.9E-03 |
| AT4G37370 | <i>CYP81D8</i>   | cytochrome P450, family 81, subfamily D, polypeptide 8                    | 1.2  | 2.7E-01 | 4.1E-01 | 2.0 | 2.1E-04 | 1.4E-02 |

| Col UV/WL Down and <i>uvr8</i> UV/WL Down |                  |                                                                                           | Col UV/WL    |         |                 | <i>uvr8</i> UV/WL     |         |                 |
|-------------------------------------------|------------------|-------------------------------------------------------------------------------------------|--------------|---------|-----------------|-----------------------|---------|-----------------|
| AGI                                       | gene             | description                                                                               | Col_UV/WL_FC | pvalue  | pvalue_with_FDR | <i>uvr8</i> _UV/WL_FC | pvalue  | pvalue_with_FDR |
| AT4G31940                                 | <i>CYP82C4</i>   | cytochrome P450, family 82, subfamily C, polypeptide 4                                    | -49.0        | 7.3E-05 | 5.4E-04         | -7.8                  | 1.5E-03 | 4.6E-02         |
| AT5G04120                                 | <i>AT5G04120</i> | Phosphoglycerate mutase family protein                                                    | -27.8        | 6.5E-07 | 9.7E-06         | -11.5                 | 1.1E-06 | 3.2E-04         |
| AT3G29970                                 | <i>AT3G29970</i> | B12D protein                                                                              | -15.2        | 8.9E-08 | 1.7E-06         | -3.5                  | 2.4E-04 | 1.5E-02         |
| AT5G04730                                 | <i>AT5G04730</i> | Ankyrin-repeat containing protein                                                         | -12.5        | 1.2E-03 | 5.6E-03         | -9.1                  | 1.3E-03 | 4.2E-02         |
| AT4G22210                                 | <i>LCR85</i>     | low-molecular-weight cysteine-rich 85                                                     | -11.7        | 8.4E-05 | 6.1E-04         | -12.5                 | 1.9E-05 | 2.6E-03         |
| AT2G28860                                 | <i>CYP710A4</i>  | cytochrome P450, family 710, subfamily A, polypeptide 4                                   | -10.5        | 1.2E-07 | 2.2E-06         | -4.3                  | 4.9E-05 | 5.2E-03         |
| AT5G52260                                 | <i>MYB19</i>     | myb domain protein 19                                                                     | -10.5        | 2.9E-07 | 4.9E-06         | -3.7                  | 6.0E-05 | 5.8E-03         |
| AT5G17720                                 | <i>AT5G17720</i> | alpha/beta-Hydrolases superfamily protein                                                 | -9.9         | 2.6E-07 | 4.5E-06         | -5.7                  | 2.0E-06 | 4.9E-04         |
| AT4G22214                                 | <i>AT4G22214</i> | Defensin-like (DEFL) family protein                                                       | -8.9         | 5.4E-07 | 8.3E-06         | -5.2                  | 6.4E-06 | 1.2E-03         |
| AT5G65800                                 | <i>ACS5</i>      | ACC synthase 5                                                                            | -8.5         | 2.9E-08 | 6.6E-07         | -2.4                  | 1.2E-03 | 4.2E-02         |
| AT3G20940                                 | <i>CYP705A30</i> | cytochrome P450, family 705, subfamily A, polypeptide 30                                  | -7.2         | 1.3E-08 | 3.3E-07         | -3.8                  | 4.9E-06 | 9.6E-04         |
| AT3G29252                                 | <i>AT3G29252</i> | pseudogene of NAD(P)-binding Rossmann-fold superfamily protein                            | -7.2         | 1.2E-03 | 5.7E-03         | -6.4                  | 8.7E-04 | 3.4E-02         |
| AT5G66815                                 | <i>AT5G66815</i> | transmembrane protein                                                                     | -6.6         | 1.7E-04 | 1.1E-03         | -5.3                  | 5.8E-05 | 5.7E-03         |
| AT1G01580                                 | <i>FRO2</i>      | ferric reduction oxidase 2                                                                | -6.2         | 3.4E-07 | 5.5E-06         | -3.8                  | 1.9E-05 | 2.7E-03         |
| AT5G42600                                 | <i>MNR1</i>      | marneral synthase                                                                         | -6.1         | 1.6E-08 | 3.9E-07         | -2.7                  | 1.1E-04 | 9.2E-03         |
| AT1G19830                                 | <i>AT1G19830</i> | SAUR-like auxin-responsive protein family                                                 | -6.0         | 4.0E-04 | 2.2E-03         | -4.0                  | 1.3E-03 | 4.4E-02         |
| AT5G35940                                 | <i>AT5G35940</i> | Mannose-binding lectin superfamily protein                                                | -5.1         | 4.9E-12 | 3.5E-10         | -2.3                  | 2.9E-06 | 6.3E-04         |
| AT5G09978                                 | <i>PEP7</i>      | elicitor peptide 7 precursor                                                              | -4.8         | 6.9E-11 | 3.6E-09         | -2.1                  | 4.0E-05 | 4.5E-03         |
| AT4G22212                                 | <i>AT4G22212</i> | defensin-like protein                                                                     | -4.6         | 7.0E-06 | 7.5E-05         | -4.6                  | 6.4E-06 | 1.2E-03         |
| AT5G41380                                 | <i>AT5G41380</i> | CCT motif family protein                                                                  | -4.6         | 3.8E-04 | 2.2E-03         | -5.2                  | 2.7E-05 | 3.4E-03         |
| AT5G43490                                 | <i>AT5G43490</i> | myb-like protein X                                                                        | -4.5         | 6.3E-04 | 3.4E-03         | -8.0                  | 2.2E-05 | 2.8E-03         |
| AT4G15393                                 | <i>CYP702A5</i>  | cytochrome P450, family 702, subfamily A, polypeptide 5                                   | -4.4         | 5.0E-09 | 1.5E-07         | -2.2                  | 2.4E-04 | 1.5E-02         |
| AT5G53250                                 | <i>AGP22</i>     | arabinogalactan protein 22                                                                | -4.4         | 6.1E-11 | 3.2E-09         | -2.2                  | 5.5E-06 | 1.1E-03         |
| AT3G05155                                 | <i>AT3G05155</i> | Major facilitator superfamily protein                                                     | -3.9         | 2.6E-06 | 3.2E-05         | -2.4                  | 4.9E-04 | 2.3E-02         |
| AT5G42590                                 | <i>CYP71A16</i>  | cytochrome P450, family 71, subfamily A, polypeptide 16                                   | -3.9         | 2.2E-10 | 9.9E-09         | -2.4                  | 6.2E-07 | 2.2E-04         |
| AT4G33120                                 | <i>AT4G33120</i> | S-adenosyl-L-methionine-dependent methyltransferases superfamily protein                  | -3.8         | 5.8E-11 | 3.1E-09         | -2.1                  | 3.1E-06 | 6.7E-04         |
| AT4G37850                                 | <i>AT4G37850</i> | basic helix-loop-helix (bHLH) DNA-binding superfamily protein                             | -3.6         | 5.5E-09 | 1.6E-07         | -2.2                  | 1.6E-05 | 2.3E-03         |
| AT5G64900                                 | <i>PROPEP1</i>   | precursor of peptide 1                                                                    | -3.6         | 1.5E-04 | 1.0E-03         | -2.6                  | 1.7E-03 | 5.0E-02         |
| AT4G21903                                 | <i>AT4G21903</i> | MATE efflux family protein                                                                | -3.6         | 4.1E-06 | 4.7E-05         | -2.1                  | 1.5E-03 | 4.7E-02         |
| AT5G55780                                 | <i>AT5G55780</i> | Cysteine/Histidine-rich C1 domain family protein                                          | -3.6         | 1.5E-05 | 1.4E-04         | -2.1                  | 1.4E-03 | 4.6E-02         |
| AT1G68800                                 | <i>TCP12</i>     | TCP domain protein 12                                                                     | -3.5         | 1.5E-05 | 1.4E-04         | -2.2                  | 8.4E-04 | 3.3E-02         |
| AT3G48940                                 | <i>AT3G48940</i> | Remorin family protein                                                                    | -3.3         | 5.9E-06 | 6.4E-05         | -2.2                  | 5.7E-04 | 2.6E-02         |
| AT4G12545                                 | <i>AT4G12545</i> | Bifunctional inhibitor/lipid-transfer protein/seed storage 2S albumin superfamily protein | -3.3         | 3.3E-06 | 3.9E-05         | -3.0                  | 1.1E-05 | 1.8E-03         |
| AT1G45015                                 | <i>AT1G45015</i> | MD-2-related lipid recognition domain-containing protein                                  | -3.2         | 2.7E-05 | 2.3E-04         | -2.3                  | 8.7E-04 | 3.4E-02         |
| AT5G23840                                 | <i>AT5G23840</i> | MD-2-related lipid recognition domain-containing protein                                  | -3.0         | 2.9E-05 | 2.5E-04         | -2.4                  | 3.6E-04 | 2.0E-02         |
| AT3G02620                                 | <i>AT3G02620</i> | Plant stearoyl-acyl-carrier-protein desaturase family protein                             | -3.0         | 2.4E-09 | 7.7E-08         | -2.4                  | 2.3E-07 | 9.5E-05         |
| AT1G09080                                 | <i>BIP3</i>      | Heat shock protein 70 (Hsp 70) family protein                                             | -2.9         | 1.5E-02 | 4.6E-02         | -4.2                  | 1.5E-03 | 4.6E-02         |
| AT3G13405                                 | <i>MIR169A</i>   |                                                                                           | -2.9         | 2.3E-04 | 1.4E-03         | -2.5                  | 1.5E-04 | 1.1E-02         |
| AT3G29250                                 | <i>SDR4</i>      | NAD(P)-binding Rossmann-fold superfamily protein                                          | -2.8         | 1.8E-08 | 4.4E-07         | -2.1                  | 7.6E-06 | 1.3E-03         |
| AT5G51790                                 | <i>AT5G51790</i> | basic helix-loop-helix (bHLH) DNA-binding superfamily protein                             | -2.8         | 2.0E-07 | 3.4E-06         | -2.1                  | 2.4E-05 | 3.0E-03         |
| AT3G43190                                 | <i>SUS4</i>      | sucrose synthase 4                                                                        | -2.8         | 6.7E-05 | 5.0E-04         | -2.1                  | 1.5E-03 | 4.6E-02         |
| AT3G60700                                 | <i>AT3G60700</i> | hypothetical protein (DUF1163)                                                            | -2.7         | 6.3E-04 | 3.3E-03         | -2.6                  | 2.9E-04 | 1.7E-02         |
| AT3G13404                                 | <i>AT3G13404</i> | hypothetical protein                                                                      | -2.6         | 1.1E-08 | 2.8E-07         | -2.1                  | 8.8E-07 | 2.7E-04         |
| AT4G37700                                 | <i>AT4G37700</i> | hypothetical protein                                                                      | -2.6         | 2.9E-05 | 2.5E-04         | -2.4                  | 5.5E-05 | 5.4E-03         |
| AT5G35525                                 | <i>AT5G35525</i> | PLAC8 family protein                                                                      | -2.5         | 6.1E-05 | 4.7E-04         | -2.2                  | 2.1E-04 | 1.4E-02         |



|           |           |                                                       |      |         |         |      |         |         |
|-----------|-----------|-------------------------------------------------------|------|---------|---------|------|---------|---------|
| AT3G29140 | AT3G29140 | hypothetical protein                                  | -2.4 | 4.6E-03 | 1.7E-02 | -2.8 | 7.8E-04 | 3.2E-02 |
| AT5G26080 | AT5G26080 | proline-rich family protein                           | -2.4 | 9.9E-04 | 4.9E-03 | -2.3 | 8.9E-04 | 3.5E-02 |
| AT3G10600 | CAT7      | cationic amino acid transporter 7                     | -2.3 | 1.3E-02 | 3.9E-02 | -2.9 | 1.3E-03 | 4.3E-02 |
| AT2G19410 | AT2G19410 | U-box domain-containing protein kinase family protein | -2.2 | 7.5E-04 | 3.8E-03 | -2.2 | 7.2E-04 | 3.1E-02 |
| AT5G60060 | AT5G60060 | F-box SKIP23-like protein (DUF295)                    | -2.1 | 1.9E-03 | 8.5E-03 | -2.4 | 4.1E-04 | 2.1E-02 |
| AT4G24265 | AT4G24265 | homeobox protein                                      | -2.0 | 2.9E-04 | 1.7E-03 | -2.6 | 2.8E-06 | 6.3E-04 |

| Col UV/WL Down |           |                                                                                               | Col UV/WL    |         |                 | uvr8 UV/WL    |         |                 |
|----------------|-----------|-----------------------------------------------------------------------------------------------|--------------|---------|-----------------|---------------|---------|-----------------|
| AGI            | gene      | description                                                                                   | Col_UV/WL_FC | pvalue  | pvalue_with_FDR | uvr8_UV/WL_FC | pvalue  | pvalue_with_FDR |
| AT1G74110      | CYP78A10  | cytochrome P450, family 78, subfamily A, polypeptide 10                                       | -64.2        | 2.8E-03 | 1.1E-02         | -1.6          | 4.6E-01 | 7.6E-01         |
| ATMG01320      | NAD2B     | NADH dehydrogenase 2B                                                                         | -58.9        | 5.6E-04 | 3.0E-03         | 1.2           | 7.6E-01 | 9.2E-01         |
| AT1G15405      | AT1G15405 |                                                                                               | -51.7        | 2.9E-05 | 2.5E-04         | 1.5           | 6.7E-01 | 8.8E-01         |
| AT5G37940      | AT5G37940 | Zinc-binding dehydrogenase family protein                                                     | -50.3        | 3.1E-04 | 1.8E-03         | 1.3           | 4.2E-01 | 7.4E-01         |
| AT5G10040      | AT5G10040 | transmembrane protein                                                                         | -47.7        | 2.5E-03 | 1.1E-02         | -2.0          | 2.0E-01 | 5.4E-01         |
| AT1G52580      | RBL5      | RHOMBOID-like protein 5                                                                       | -34.7        | 2.6E-03 | 1.1E-02         | -1.3          | 6.9E-01 | 8.9E-01         |
| AT4G11020      | AT4G11020 | hypothetical protein                                                                          | -32.6        | 7.7E-03 | 2.6E-02         | -2.1          | 1.2E-01 | 4.4E-01         |
| AT3G28310      | AT3G28310 | hypothetical protein (DUF677)                                                                 | -32.2        | 2.1E-03 | 9.2E-03         | -1.4          | 6.2E-01 | 8.5E-01         |
| AT4G37950      | AT4G37950 | Rhamnogalacturonate lyase family protein                                                      | -27.6        | 1.4E-07 | 2.6E-06         | -2.4          | 5.8E-03 | 9.9E-02         |
| ATCG00700      | PSBN      | photosystem II reaction center protein N                                                      | -26.2        | 2.5E-04 | 1.5E-03         | -1.4          | 7.6E-01 | 9.2E-01         |
| AT4G10160      | AT4G10160 | RING/U-box superfamily protein                                                                | -25.9        | 1.4E-06 | 1.9E-05         | -2.8          | 1.4E-02 | 1.5E-01         |
| AT5G66260      | AT5G66260 | SAUR-like auxin-responsive protein family                                                     | -25.2        | 4.3E-08 | 9.3E-07         | -2.1          | 9.8E-03 | 1.3E-01         |
| AT5G54190      | PORA      | protochlorophyllide oxidoreductase A                                                          | -23.9        | 2.0E-08 | 4.8E-07         | -2.0          | 3.1E-02 | 2.3E-01         |
| AT2G31141      | AT2G31141 | hypothetical protein                                                                          | -19.8        | 8.5E-05 | 6.1E-04         | 1.3           | 7.7E-01 | 9.2E-01         |
| AT2G33790      | AGP30     | arabinogalactan protein 30                                                                    | -19.4        | 4.3E-07 | 6.8E-06         | -1.1          | 7.1E-01 | 9.0E-01         |
| AT2G43860      | AT2G43860 | Pectin lyase-like superfamily protein                                                         | -16.9        | 2.5E-05 | 2.2E-04         | -2.5          | 4.1E-02 | 2.6E-01         |
| AT2G14560      | LURP1     | LURP-one-like protein (DUF567)                                                                | -14.7        | 8.8E-05 | 6.3E-04         | -3.8          | 3.9E-03 | 7.8E-02         |
| AT4G37770      | ACS8      | 1-amino-cyclopropane-1-carboxylate synthase 8                                                 | -14.6        | 5.2E-05 | 4.1E-04         | -1.5          | 3.1E-01 | 6.5E-01         |
| AT1G28450      | AGL58     | AGAMOUS-like 58                                                                               | -13.0        | 1.3E-04 | 8.7E-04         | -2.2          | 3.0E-02 | 2.3E-01         |
| AT1G70260      | UMAMIT36  | nodulin MtN21 /EamA-like transporter family protein                                           | -12.6        | 1.6E-05 | 1.5E-04         | -1.2          | 6.2E-01 | 8.5E-01         |
| AT1G70130      | AT1G70130 | Concanavalin A-like lectin protein kinase family protein                                      | -12.4        | 1.5E-02 | 4.4E-02         | -1.1          | 8.4E-01 | 9.5E-01         |
| AT2G44840      | ERF13     | ethylene-responsive element binding factor 13                                                 | -12.4        | 1.7E-04 | 1.1E-03         | -2.0          | 1.4E-01 | 4.6E-01         |
| AT4G13790      | AT4G13790 | SAUR-like auxin-responsive protein family                                                     | -11.9        | 9.7E-03 | 3.2E-02         | -1.5          | 3.7E-01 | 7.0E-01         |
| AT5G37300      | WSD1      | O-acyltransferase (WSD1-like) family protein                                                  | -11.7        | 2.9E-05 | 2.5E-04         | -1.7          | 7.3E-02 | 3.5E-01         |
| AT5G44440      | AT5G44440 | FAD-binding Berberine family protein                                                          | -11.6        | 1.8E-07 | 3.1E-06         | -1.7          | 9.9E-02 | 4.0E-01         |
| AT2G41280      | M10       | late embryogenesis abundant protein (M10) / LEA protein M10                                   | -11.1        | 6.4E-03 | 2.3E-02         | -2.2          | 2.1E-01 | 5.5E-01         |
| AT3G57950      | AT3G57950 | cotton fiber protein                                                                          | -10.8        | 7.3E-04 | 3.7E-03         | -2.2          | 6.0E-02 | 3.2E-01         |
| AT5G46890      | AT5G46890 | Bifunctional inhibitor/lipid-transfer protein/seed storage 2S albumin superfamily protein     | -10.6        | 4.7E-17 | 1.5E-14         | -2.0          | 3.9E-06 | 8.0E-04         |
| AT5G02000      | AT5G02000 | hypothetical protein                                                                          | -10.1        | 3.8E-03 | 1.5E-02         | -3.1          | 2.1E-02 | 1.9E-01         |
| AT3G28380      | ABCB17    | P-glycoprotein 17                                                                             | -10.0        | 3.4E-03 | 1.3E-02         | -2.0          | 2.2E-01 | 5.7E-01         |
| ATCG00210      | YCF6      | electron transporter, transferring electrons within cytochrome b6/f complex of photosystem II | -9.9         | 1.3E-03 | 5.9E-03         | -1.7          | 5.3E-01 | 8.1E-01         |
| AT1G23160      | AT1G23160 | Auxin-responsive GH3 family protein                                                           | -9.8         | 2.7E-07 | 4.6E-06         | -1.7          | 8.6E-02 | 3.7E-01         |
| AT2G44220      | AT2G44220 | NEP-interacting protein (DUF239)                                                              | -9.8         | 5.1E-03 | 1.9E-02         | -1.5          | 3.8E-01 | 7.1E-01         |
| AT2G26390      | AT2G26390 | Serine protease inhibitor (SERPIN) family protein                                             | -9.8         | 4.4E-05 | 3.5E-04         | -1.8          | 6.6E-02 | 3.3E-01         |
| ATMG01380      | RRN5      |                                                                                               | -9.7         | 4.0E-04 | 2.3E-03         | 1.3           | 7.7E-01 | 9.2E-01         |
| AT3G23635      | RTFL13    | ROTUNDIFOLIA like 13                                                                          | -9.7         | 4.6E-06 | 5.3E-05         | -1.3          | 3.4E-01 | 6.8E-01         |
| AT2G22930      | AT2G22930 | UDP-Glycosyltransferase superfamily protein                                                   | -9.4         | 3.5E-10 | 1.5E-08         | -1.4          | 6.0E-02 | 3.2E-01         |
| AT1G62280      | SLAH1     | SLAC1 homologue 1                                                                             | -9.3         | 9.2E-11 | 4.7E-09         | 1.0           | 8.8E-01 | 9.7E-01         |
| AT4G00910      | AT4G00910 | aluminum activated malate transporter family protein                                          | -9.0         | 4.3E-13 | 4.3E-11         | 1.2           | 1.9E-01 | 5.4E-01         |
| AT4G01890      | AT4G01890 | Pectin lyase-like superfamily protein                                                         | -8.9         | 4.6E-07 | 7.2E-06         | -2.0          | 2.1E-02 | 1.9E-01         |
| AT3G43400      | AT3G43400 | ELMO/CED-12 family protein                                                                    | -8.8         | 1.4E-02 | 4.3E-02         | -1.5          | 4.4E-01 | 7.5E-01         |
| AT2G01010      | AT2G01010 |                                                                                               | -8.7         | 9.5E-04 | 4.7E-03         | 1.2           | 8.2E-01 | 9.4E-01         |
| AT1G19250      | FMO1      | flavin-dependent monooxygenase 1                                                              | -8.7         | 2.4E-07 | 4.1E-06         | -1.2          | 4.2E-01 | 7.4E-01         |
| AT1G06350      | ADS4      | Fatty acid desaturase family protein                                                          | -8.7         | 4.1E-12 | 3.0E-10         | 1.1           | 5.9E-01 | 8.4E-01         |
| AT4G33790      | CER4      | Jojoba acyl CoA reductase-related male sterility protein                                      | -8.6         | 7.5E-09 | 2.1E-07         | -1.5          | 9.7E-02 | 4.0E-01         |
| AT3G51410      | AT3G51410 | hypothetical protein (DUF241)                                                                 | -8.6         | 1.1E-02 | 3.6E-02         | 1.7           | 1.8E-01 | 5.2E-01         |
| AT3G14370      | WAG2      | Protein kinase superfamily protein                                                            | -8.5         | 1.1E-10 | 5.4E-09         | 1.0           | 9.1E-01 | 9.8E-01         |
| AT4G19690      | IRT1      | iron-regulated transporter 1                                                                  | -8.5         | 1.6E-04 | 1.1E-03         | -2.8          | 2.7E-02 | 2.1E-01         |
| AT1G44020      | AT1G44020 | Cysteine/Histidine-rich C1 domain family protein                                              | -8.2         | 7.2E-06 | 7.6E-05         | -1.1          | 8.6E-01 | 9.6E-01         |
| ATCG00450      | TRNV.1    | tRNA-Val                                                                                      | -8.0         | 5.9E-03 | 2.1E-02         | 1.3           | 7.3E-01 | 9.1E-01         |
| AT5G07010      | ST2A      | sulfotransferase 2A                                                                           | -7.8         | 2.6E-06 | 3.3E-05         | -1.7          | 8.7E-02 | 3.8E-01         |
| AT1G52830      | IAA6      | indole-3-acetic acid 6                                                                        | -7.8         | 4.5E-06 | 5.2E-05         | -2.3          | 1.4E-02 | 1.5E-01         |
| AT3G15250      | AT3G15250 | TPRXL                                                                                         | -7.8         | 1.1E-05 | 1.1E-04         | -1.5          | 2.0E-01 | 5.5E-01         |
| AT1G80740      | CMT1      | chromomethylase 1                                                                             | -7.8         | 1.8E-05 | 1.6E-04         | -2.0          | 4.0E-02 | 2.6E-01         |
| AT5G26300      | AT5G26300 | TRAF-like family protein                                                                      | -7.7         | 4.0E-03 | 1.6E-02         | -6.1          | 1.2E-02 | 1.4E-01         |
| AT5G37950      | AT5G37950 | UDP-Glycosyltransferase superfamily protein                                                   | -7.5         | 3.6E-09 | 1.1E-07         | -1.1          | 7.3E-01 | 9.1E-01         |
| AT2G13810      | ALD1      | AGD2-like defense response protein 1                                                          | -7.4         | 1.5E-05 | 1.4E-04         | -1.4          | 3.0E-01 | 6.4E-01         |
| AT3G47760      | ABCA5     | ABC2 homolog 4                                                                                | -7.3         | 9.9E-03 | 3.2E-02         | -3.1          | 9.9E-02 | 4.0E-01         |
| AT5G62330      | AT5G62330 | hypothetical protein                                                                          | -7.3         | 9.0E-04 | 4.5E-03         | -1.6          | 2.4E-01 | 5.9E-01         |
| ATCG01210      | RRN16S.2  |                                                                                               | -7.2         | 3.5E-03 | 1.4E-02         | -1.4          | 6.6E-01 | 8.7E-01         |
| AT3G55515      | RTFL7     | ROTUNDIFOLIA like 7                                                                           | -7.2         | 1.3E-03 | 6.3E-03         | -2.9          | 1.4E-02 | 1.5E-01         |
| ATCG00920      | RRN16S.1  |                                                                                               | -7.1         | 6.2E-03 | 2.2E-02         | 2.0           | 4.3E-01 | 7.4E-01         |
| AT4G25420      | GA20OX1   | 2-oxoglutarate (2OG) and Fe(II)-dependent oxygenase superfamily protein                       | -7.1         | 6.1E-08 | 1.2E-06         | -2.0          | 8.6E-03 | 1.2E-01         |
| AT3G06437      | AT3G06437 | pseudogene of hypothetical protein                                                            | -7.1         | 8.6E-03 | 2.9E-02         | 1.5           | 4.6E-01 | 7.6E-01         |

|           |                 |                                                                                           |      |         |         |      |         |         |
|-----------|-----------------|-------------------------------------------------------------------------------------------|------|---------|---------|------|---------|---------|
| AT3G55180 | AT3G55180       | alpha/beta-Hydrolases superfamily protein                                                 | -7.0 | 6.6E-03 | 2.3E-02 | -4.9 | 1.5E-02 | 1.6E-01 |
| AT5G46900 | AT5G46900       | Bifunctional inhibitor/lipid-transfer protein/seed storage 2S albumin superfamily protein | -6.9 | 1.7E-12 | 1.4E-10 | -1.8 | 3.8E-04 | 2.0E-02 |
| AT1G44318 | <i>hemb2</i>    | Aldolase superfamily protein                                                              | -6.9 | 1.6E-04 | 1.1E-03 | -2.2 | 7.1E-02 | 3.4E-01 |
| AT3G02810 | AT3G02810       | Protein kinase superfamily protein                                                        | -6.7 | 6.5E-04 | 3.4E-03 | -1.1 | 7.7E-01 | 9.2E-01 |
| AT1G63950 | AT1G63950       | Heavy metal transport/detoxification superfamily protein                                  | -6.7 | 3.9E-03 | 1.5E-02 | -3.7 | 1.1E-02 | 1.3E-01 |
| AT3G41768 | AT3G41768       |                                                                                           | -6.6 | 5.1E-03 | 1.9E-02 | -1.0 | 9.6E-01 | 9.9E-01 |
| AT2G23170 | <i>GH3.3</i>    | Auxin-responsive GH3 family protein                                                       | -6.6 | 2.0E-07 | 3.5E-06 | 1.4  | 1.8E-01 | 5.2E-01 |
| AT5G10430 | <i>AGP4</i>     | arabinogalactan protein 4                                                                 | -6.5 | 2.7E-12 | 2.1E-10 | -1.8 | 1.2E-03 | 4.2E-02 |
| AT4G27460 | <i>CBSX5</i>    | Cystathionine beta-synthase (CBS) family protein                                          | -6.4 | 4.9E-06 | 5.5E-05 | -2.5 | 3.6E-03 | 7.6E-02 |
| AT1G18835 | <i>MIF3</i>     | mini zinc finger                                                                          | -6.4 | 8.3E-05 | 6.0E-04 | -1.0 | 9.5E-01 | 9.9E-01 |
| AT5G60010 | AT5G60010       | ferric reductase-like transmembrane component family protein                              | -6.3 | 7.5E-04 | 3.9E-03 | -1.2 | 6.6E-01 | 8.8E-01 |
| AT2G31082 | <i>CLE7</i>     | CLAVATA3/ESR-RELATED 7                                                                    | -6.3 | 4.1E-03 | 1.6E-02 | 1.5  | 3.0E-01 | 6.4E-01 |
| AT2G01770 | <i>VIT1</i>     | vacuolar iron transporter 1                                                               | -6.2 | 5.4E-03 | 2.0E-02 | 1.1  | 8.8E-01 | 9.7E-01 |
| AT4G29450 | AT4G29450       | Leucine-rich repeat protein kinase family protein                                         | -6.2 | 5.9E-07 | 8.9E-06 | -1.7 | 3.0E-02 | 2.3E-01 |
| ATCG01180 | <i>RRN23S.2</i> |                                                                                           | -6.1 | 1.9E-03 | 8.1E-03 | 1.8  | 3.0E-01 | 6.5E-01 |
| AT5G44770 | AT5G44770       | Cysteine/Histidine-rich C1 domain family protein                                          | -6.1 | 1.4E-02 | 4.2E-02 | 1.2  | 6.5E-01 | 8.7E-01 |
| AT4G22217 | AT4G22217       | defensin-like protein                                                                     | -6.0 | 7.0E-03 | 2.5E-02 | -3.3 | 6.3E-02 | 3.2E-01 |
| AT3G13900 | AT3G13900       | ATPase E1-E2 type family protein / haloacid dehalogenase-like hydrolase family protein    | -6.0 | 4.1E-08 | 8.9E-07 | -1.9 | 2.4E-03 | 6.2E-02 |
| AT1G67265 | <i>RTFL21</i>   | ROTUNDIFOLIA like 21                                                                      | -5.8 | 9.8E-06 | 9.9E-05 | -1.6 | 7.8E-02 | 3.6E-01 |
| AT3G02670 | AT3G02670       | Glycine-rich protein family                                                               | -5.8 | 8.4E-09 | 2.3E-07 | -1.4 | 8.4E-02 | 3.7E-01 |
| AT4G21850 | <i>MRSB9</i>    | methionine sulfoxide reductase B9                                                         | -5.8 | 4.7E-12 | 3.4E-10 | -1.5 | 1.2E-02 | 1.4E-01 |
| AT4G26460 | AT4G26460       | S-adenosyl-L-methionine-dependent methyltransferases superfamily protein                  | -5.8 | 6.4E-03 | 2.3E-02 | -2.6 | 4.0E-02 | 2.6E-01 |
| AT1G73220 |                 | organic cation/carnitine transporter1                                                     | -5.7 | 5.5E-06 | 6.0E-05 | 1.1  | 8.2E-01 | 9.4E-01 |
| AT5G22500 | <i>FAR1</i>     | fatty acid reductase 1                                                                    | -5.7 | 1.1E-05 | 1.1E-04 | 1.0  | 9.8E-01 | 1.0E+00 |
| AT5G67060 | <i>HEC1</i>     | basic helix-loop-helix (bHLH) DNA-binding superfamily protein                             | -5.7 | 3.0E-09 | 9.6E-08 | -1.3 | 1.7E-01 | 5.1E-01 |
| AT5G33390 | AT5G33390       | glycine-rich protein                                                                      | -5.6 | 7.8E-03 | 2.7E-02 | 1.1  | 8.8E-01 | 9.6E-01 |
| AT2G38600 | AT2G38600       | HAD superfamily, subfamily IIIB acid phosphatase                                          | -5.6 | 1.4E-04 | 9.3E-04 | 1.5  | 2.5E-01 | 6.0E-01 |
| AT3G15540 | <i>IAA19</i>    | indole-3-acetic acid inducible 19                                                         | -5.6 | 8.2E-07 | 1.2E-05 | -1.7 | 3.7E-02 | 2.5E-01 |
| AT5G12940 | AT5G12940       | Leucine-rich repeat (LRR) family protein                                                  | -5.6 | 2.5E-08 | 5.9E-07 | -1.5 | 5.1E-02 | 2.9E-01 |
| AT5G51210 | <i>OLEO3</i>    | oleosin3                                                                                  | -5.5 | 7.6E-05 | 5.6E-04 | -1.7 | 7.5E-02 | 3.5E-01 |
| AT4G10020 | <i>HSD5</i>     | hydroxysteroid dehydrogenase 5                                                            | -5.5 | 4.3E-05 | 3.5E-04 | -1.5 | 2.1E-01 | 5.6E-01 |
| AT3G01260 | AT3G01260       | Galactose mutarotase-like superfamily protein                                             | -5.5 | 1.8E-12 | 1.5E-10 | -1.4 | 1.5E-02 | 1.6E-01 |
| AT1G67100 | <i>LBD40</i>    | LOB domain-containing protein 40                                                          | -5.5 | 1.6E-06 | 2.1E-05 | -1.6 | 6.7E-02 | 3.3E-01 |
| AT3G45960 | <i>EXLA3</i>    | expansin-like A3                                                                          | -5.5 | 6.9E-06 | 7.3E-05 | -1.9 | 2.4E-02 | 2.0E-01 |
| AT1G17810 | <i>BETA-TIP</i> | beta-tonoplast intrinsic protein                                                          | -5.5 | 2.2E-05 | 1.9E-04 | -1.4 | 3.0E-01 | 6.4E-01 |
| AT1G60050 | <i>UMAMIT35</i> | Nodulin MtN21 /EamA-like transporter family protein                                       | -5.4 | 1.2E-05 | 1.2E-04 | -1.8 | 4.3E-02 | 2.7E-01 |
| AT5G01330 | <i>PDC3</i>     | pyruvate decarboxylase-3                                                                  | -5.4 | 4.7E-11 | 2.6E-09 | -1.3 | 5.0E-02 | 2.9E-01 |
| AT1G53690 | AT1G53690       | DNA directed RNA polymerase, 7 kDa subunit                                                | -5.3 | 3.6E-08 | 7.9E-07 | -1.7 | 9.0E-03 | 1.2E-01 |
| AT1G04180 | <i>YUCA9</i>    | YUCCA 9                                                                                   | -5.3 | 3.4E-05 | 2.9E-04 | -2.1 | 2.8E-02 | 2.2E-01 |
| AT5G05290 | <i>EXPA2</i>    | expansin A2                                                                               | -5.3 | 1.3E-06 | 1.8E-05 | -1.7 | 3.2E-02 | 2.3E-01 |
| AT2G44910 | <i>HB4</i>      | homeobox-leucine zipper protein 4                                                         | -5.2 | 1.0E-04 | 7.3E-04 | -2.3 | 2.3E-02 | 2.0E-01 |
| ATCG00570 | <i>PSBF</i>     | photosystem II reaction center protein F                                                  | -5.2 | 1.5E-02 | 4.4E-02 | 1.3  | 6.7E-01 | 8.8E-01 |
| AT4G23030 | AT4G23030       | MATE efflux family protein                                                                | -5.2 | 6.7E-13 | 6.4E-11 | -1.3 | 3.1E-02 | 2.3E-01 |
| AT1G70850 | <i>MLP34</i>    | MLP-like protein 34                                                                       | -5.2 | 7.1E-08 | 1.4E-06 | -1.5 | 8.1E-02 | 3.6E-01 |
| AT1G77530 | AT1G77530       | O-methyltransferase family protein                                                        | -5.2 | 2.2E-04 | 1.4E-03 | -2.4 | 1.5E-02 | 1.6E-01 |
| AT2G40250 | AT2G40250       | SGNH hydrolase-type esterase superfamily protein                                          | -5.2 | 7.7E-03 | 2.6E-02 | 2.2  | 6.9E-02 | 3.4E-01 |
| AT2G17850 | AT2G17850       | Rhodanese/Cell cycle control phosphatase superfamily protein                              | -5.2 | 2.7E-04 | 1.6E-03 | -2.8 | 5.3E-03 | 9.3E-02 |
| AT4G35720 | AT4G35720       | DUF241 domain protein, putative (DUF241)                                                  | -5.1 | 5.1E-06 | 5.7E-05 | -1.5 | 1.6E-01 | 5.0E-01 |
| AT2G42990 | AT2G42990       | GDSL-like Lipase/Acylhydrolase superfamily protein                                        | -5.1 | 2.0E-08 | 4.8E-07 | 1.1  | 5.4E-01 | 8.1E-01 |
| AT1G62770 | AT1G62770       | Plant invertase/pectin methylesterase inhibitor superfamily protein                       | -5.1 | 1.9E-12 | 1.6E-10 | -1.3 | 7.1E-02 | 3.4E-01 |
| AT1G04560 | AT1G04560       | AWPM-19-like family protein                                                               | -5.1 | 8.7E-03 | 2.9E-02 | -1.0 | 1.0E+00 | 1.0E+00 |
| AT3G12240 | <i>SCPL15</i>   | serine carboxypeptidase-like 15                                                           | -5.1 | 1.8E-07 | 3.1E-06 | -1.4 | 9.2E-02 | 3.9E-01 |
| AT5G59370 | <i>ACT4</i>     | actin 4                                                                                   | -5.0 | 3.4E-03 | 1.4E-02 | -1.5 | 3.3E-01 | 6.7E-01 |
| AT5G57240 | <i>ORP4C</i>    | OSBP(oxysterol binding protein)-related protein 4C                                        | -5.0 | 3.0E-09 | 9.5E-08 | -1.3 | 1.2E-01 | 4.4E-01 |
| AT4G25250 | AT4G25250       | Plant invertase/pectin methylesterase inhibitor superfamily protein                       | -5.0 | 4.2E-08 | 9.1E-07 | -1.5 | 4.9E-02 | 2.9E-01 |
| AT5G39820 | <i>NAC094</i>   | NAC domain containing protein 94                                                          | -5.0 | 1.3E-02 | 4.1E-02 | 1.3  | 6.0E-01 | 8.5E-01 |
| AT3G17760 | <i>GAD5</i>     | glutamate decarboxylase 5                                                                 | -5.0 | 9.2E-03 | 3.0E-02 | 1.4  | 4.0E-01 | 7.2E-01 |
| AT4G09130 | AT4G09130       | RING/U-box superfamily protein                                                            | -5.0 | 9.0E-04 | 4.5E-03 | -1.1 | 7.6E-01 | 9.2E-01 |
| AT1G23060 | <i>MDP40</i>    | hypothetical protein                                                                      | -5.0 | 8.9E-09 | 2.4E-07 | 1.0  | 8.6E-01 | 9.6E-01 |
| AT3G28857 | <i>PRE5</i>     | basic helix-loop-helix (bHLH) DNA-binding family protein                                  | -5.0 | 6.4E-05 | 4.9E-04 | -1.1 | 6.1E-01 | 8.5E-01 |
| ATMG01130 | <i>ORF106F</i>  | hypothetical protein                                                                      | -4.9 | 8.4E-03 | 2.8E-02 | 1.5  | 4.0E-01 | 7.2E-01 |
| AT3G59370 | AT3G59370       | Vacuolar calcium-binding protein-like protein                                             | -4.9 | 1.6E-09 | 5.5E-08 | -1.9 | 5.8E-04 | 2.6E-02 |
| AT5G62340 | AT5G62340       | Plant invertase/pectin methylesterase inhibitor superfamily protein                       | -4.9 | 2.3E-04 | 1.4E-03 | 1.3  | 4.6E-01 | 7.6E-01 |
| AT2G22810 | <i>ACS4</i>     | 1-aminocyclopropane-1-carboxylate synthase 4                                              | -4.8 | 7.1E-04 | 3.7E-03 | -2.7 | 1.4E-02 | 1.5E-01 |
| AT2G19660 | AT2G19660       | Cysteine/Histidine-rich C1 domain family protein                                          | -4.8 | 1.1E-11 | 7.0E-10 | -1.7 | 5.5E-04 | 2.5E-02 |
| AT1G29490 | AT1G29490       | SAUR-like auxin-responsive protein family                                                 | -4.8 | 1.1E-04 | 7.9E-04 | -1.4 | 2.8E-01 | 6.3E-01 |
| AT5G25415 | AT5G25415       | hypothetical protein (DUF239)                                                             | -4.8 | 1.9E-05 | 1.8E-04 | -1.6 | 1.6E-01 | 4.9E-01 |
| AT5G06720 | <i>PA2</i>      | peroxidase 2                                                                              | -4.8 | 2.9E-07 | 4.9E-06 | -2.0 | 3.3E-03 | 7.3E-02 |
| AT3G47380 | AT3G47380       | Plant invertase/pectin methylesterase inhibitor superfamily protein                       | -4.8 | 1.7E-04 | 1.1E-03 | -1.0 | 9.2E-01 | 9.8E-01 |
| AT3G50130 | AT3G50130       | transmembrane protein, putative (DUF247)                                                  | -4.8 | 7.6E-11 | 3.9E-09 | -1.6 | 1.8E-03 | 5.1E-02 |

|           |           |                                                                                           |      |         |         |      |         |         |
|-----------|-----------|-------------------------------------------------------------------------------------------|------|---------|---------|------|---------|---------|
| AT5G63820 | AT5G63820 | hypothetical protein (DUF626)                                                             | -4.8 | 7.1E-08 | 1.4E-06 | -1.9 | 3.9E-03 | 7.9E-02 |
| AT4G34790 | AT4G34790 | SAUR-like auxin-responsive protein family                                                 | -4.7 | 1.3E-09 | 4.7E-08 | -1.3 | 1.2E-01 | 4.3E-01 |
| AT3G19320 | AT3G19320 | Leucine-rich repeat (LRR) family protein                                                  | -4.7 | 6.1E-06 | 6.6E-05 | -2.0 | 9.1E-03 | 1.2E-01 |
| AT5G63650 | SNRK2.5   | SNF1-related protein kinase 2.5                                                           | -4.7 | 3.9E-09 | 1.2E-07 | -1.2 | 2.4E-01 | 5.9E-01 |
| ATCG00490 | RBCL      | ribulose-bisphosphate carboxylase                                                         | -4.7 | 6.6E-03 | 2.3E-02 | 1.3  | 6.2E-01 | 8.6E-01 |
| AT1G06120 | AT1G06120 | Fatty acid desaturase family protein                                                      | -4.7 | 2.7E-08 | 6.2E-07 | -1.5 | 4.2E-02 | 2.7E-01 |
| ATCG00950 | RRN23S.1  |                                                                                           | -4.7 | 7.4E-03 | 2.6E-02 | 1.3  | 6.8E-01 | 8.8E-01 |
| AT2G28780 | AT2G28780 | P-hydroxybenzoic acid efflux pump subunit                                                 | -4.7 | 4.9E-12 | 3.5E-10 | 1.0  | 9.1E-01 | 9.8E-01 |
| AT3G50330 | HEC2      | basic helix-loop-helix (bHLH) DNA-binding superfamily protein                             | -4.6 | 2.4E-03 | 1.0E-02 | -1.3 | 4.5E-01 | 7.6E-01 |
| AT5G44417 | AT5G44417 | pseudogene of FAD-binding Berberine family                                                | -4.6 | 2.7E-06 | 3.3E-05 | -1.6 | 5.0E-02 | 2.9E-01 |
| AT1G22290 | AT1G22290 | 14-3-3 family protein                                                                     | -4.6 | 1.5E-05 | 1.4E-04 | -2.1 | 7.4E-03 | 1.1E-01 |
| AT3G46400 | AT3G46400 | Leucine-rich repeat protein kinase family protein                                         | -4.6 | 1.5E-06 | 2.0E-05 | -1.9 | 9.6E-03 | 1.3E-01 |
| AT3G27970 | AT3G27970 | Exonuclease family protein                                                                | -4.6 | 1.3E-03 | 6.0E-03 | -2.0 | 6.4E-02 | 3.3E-01 |
| AT1G06080 | ADS1      | delta 9 desaturase 1                                                                      | -4.6 | 5.9E-06 | 6.4E-05 | 1.1  | 6.9E-01 | 8.9E-01 |
| ATCG00580 | PSBE      | photosystem II reaction center protein E                                                  | -4.6 | 9.5E-03 | 3.1E-02 | 1.1  | 8.6E-01 | 9.6E-01 |
| AT3G48300 | CYP71A23  | cytochrome P450, family 71, subfamily A, polypeptide 23                                   | -4.6 | 4.2E-04 | 2.4E-03 | -1.3 | 3.7E-01 | 7.0E-01 |
| AT1G11125 | AT1G11125 | hypothetical protein                                                                      | -4.5 | 4.8E-06 | 5.5E-05 | -1.6 | 4.4E-02 | 2.7E-01 |
| AT4G12510 | AT4G12510 | Bifunctional inhibitor/lipid-transfer protein/seed storage 2S albumin superfamily protein | -4.5 | 5.6E-10 | 2.2E-08 | -1.5 | 1.4E-02 | 1.5E-01 |
| AT3G55310 | AT3G55310 | NAD(P)-binding Rossmann-fold superfamily protein                                          | -4.4 | 1.3E-04 | 8.8E-04 | -2.5 | 8.7E-03 | 1.2E-01 |
| AT5G58784 | AT5G58784 | Undecaprenyl pyrophosphate synthetase family protein                                      | -4.4 | 5.2E-04 | 2.8E-03 | -1.3 | 4.4E-01 | 7.5E-01 |
| AT2G04038 | bZIP48    | basic leucine-zipper 48                                                                   | -4.4 | 7.1E-03 | 2.5E-02 | -1.1 | 6.7E-01 | 8.8E-01 |
| AT1G20520 | AT1G20520 | DUF241 domain protein, putative (DUF241)                                                  | -4.4 | 1.4E-03 | 6.5E-03 | -2.9 | 1.7E-02 | 1.7E-01 |
| AT2G39510 | UMAMIT14  | nodulin MtN21 /EamA-like transporter family protein                                       | -4.4 | 1.3E-02 | 4.0E-02 | -1.1 | 8.4E-01 | 9.5E-01 |
| AT3G53232 | RTFL1     | ROTUNDIFOLIA like 1                                                                       | -4.4 | 5.5E-03 | 2.0E-02 | -1.6 | 1.5E-01 | 4.8E-01 |
| AT1G32450 | NRT1.5    | nitrate transporter 1.5                                                                   | -4.4 | 1.9E-10 | 8.6E-09 | -1.1 | 4.0E-01 | 7.2E-01 |
| AT2G20750 | EXPB1     | expansin B1                                                                               | -4.4 | 3.1E-13 | 3.3E-11 | -1.5 | 1.7E-03 | 5.0E-02 |
| AT1G54020 | AT1G54020 | GDSL-like Lipase/Acylhydrolase superfamily protein                                        | -4.3 | 5.4E-03 | 2.0E-02 | -2.1 | 5.9E-02 | 3.1E-01 |
| AT1G68825 | RTFL15    | ROTUNDIFOLIA like 15                                                                      | -4.3 | 4.8E-03 | 1.8E-02 | -1.6 | 2.6E-01 | 6.1E-01 |
| AT2G03370 | AT2G03370 | O-linked-mannose beta-1,4-N-acetylglucosaminyltransferase-like protein                    | -4.3 | 2.9E-05 | 2.5E-04 | -1.4 | 1.8E-01 | 5.2E-01 |
| AT1G08500 | ENODL18   | early nodulin-like protein 18                                                             | -4.3 | 1.9E-13 | 2.2E-11 | -1.4 | 2.6E-03 | 6.4E-02 |
| AT1G27140 | GSTU14    | glutathione S-transferase tau 14                                                          | -4.3 | 2.5E-05 | 2.2E-04 | -1.0 | 8.6E-01 | 9.6E-01 |
| AT1G13420 | ST4B      | sulfotransferase 4B                                                                       | -4.3 | 3.7E-07 | 6.0E-06 | -1.1 | 7.3E-01 | 9.1E-01 |
| AT3G27500 | AT3G27500 | Cysteine/Histidine-rich C1 domain family protein                                          | -4.3 | 4.4E-08 | 9.4E-07 | -1.6 | 9.2E-03 | 1.2E-01 |
| AT1G05420 | OFFP12    | ovate family protein 12                                                                   | -4.3 | 8.8E-08 | 1.7E-06 | -1.5 | 4.2E-02 | 2.7E-01 |
| AT4G22610 | AT4G22610 | Bifunctional inhibitor/lipid-transfer protein/seed storage 2S albumin superfamily protein | -4.3 | 1.0E-04 | 7.1E-04 | -2.2 | 1.4E-02 | 1.5E-01 |
| AT4G11310 | AT4G11310 | Papain family cysteine protease                                                           | -4.2 | 7.7E-05 | 5.7E-04 | 1.0  | 8.8E-01 | 9.7E-01 |
| AT2G01610 | AT2G01610 | Plant invertase/pectin methylesterase inhibitor superfamily protein                       | -4.2 | 1.2E-03 | 5.6E-03 | -1.0 | 9.5E-01 | 9.9E-01 |
| AT1G45035 | AT1G45035 | transposable_element_gene                                                                 | -4.2 | 6.7E-04 | 3.5E-03 | -2.5 | 1.7E-02 | 1.7E-01 |
| AT3G53250 | AT3G53250 | SAUR-like auxin-responsive protein family                                                 | -4.2 | 3.2E-09 | 1.0E-07 | -1.2 | 3.6E-01 | 6.9E-01 |
| AT2G41850 | PGAZAT    | polygalacturonase ADPG2-like protein                                                      | -4.2 | 9.7E-04 | 4.8E-03 | 1.1  | 8.7E-01 | 9.6E-01 |
| AT4G01335 | AT4G01335 | TATA box-binding protein associated factor RNA polymerase I subunit B-like protein        | -4.2 | 6.2E-06 | 6.7E-05 | -1.4 | 1.9E-01 | 5.4E-01 |
| AT2G43480 | AT2G43480 | Peroxidase superfamily protein                                                            | -4.2 | 5.9E-03 | 2.1E-02 | -1.0 | 9.0E-01 | 9.8E-01 |
| AT5G46845 | MIR160C   |                                                                                           | -4.2 | 3.2E-04 | 1.9E-03 | -1.3 | 4.2E-01 | 7.4E-01 |
| AT5G15430 | AT5G15430 | Plant calmodulin-binding protein-like protein                                             | -4.2 | 7.0E-04 | 3.6E-03 | -2.6 | 3.6E-03 | 7.6E-02 |
| AT4G01140 | AT4G01140 | transmembrane protein, putative (DUF1191)                                                 | -4.2 | 6.3E-10 | 2.4E-08 | -1.5 | 4.7E-03 | 8.7E-02 |
| AT5G15150 | HB-3      | homeobox 3                                                                                | -4.2 | 5.2E-11 | 2.9E-09 | -1.4 | 9.0E-03 | 1.2E-01 |
| AT4G30290 | XTH19     | xyloglucan endotransglucosylase/hydrolase 19                                              | -4.1 | 1.1E-08 | 2.9E-07 | -1.5 | 2.4E-02 | 2.0E-01 |
| AT2G31083 | CLE5      | CLAVATA3/ESR-RELATED 5                                                                    | -4.1 | 2.4E-07 | 4.1E-06 | -1.3 | 1.7E-01 | 5.2E-01 |
| AT1G51260 | LPAT3     | lysophosphatidyl acyltransferase 3                                                        | -4.1 | 2.8E-04 | 1.7E-03 | -2.0 | 1.9E-02 | 1.8E-01 |
| AT4G03480 | AT4G03480 | Ankyrin repeat family protein                                                             | -4.1 | 6.6E-06 | 7.1E-05 | -1.1 | 5.7E-01 | 8.3E-01 |
| AT1G29090 | AT1G29090 | Cysteine proteinases superfamily protein                                                  | -4.1 | 1.6E-04 | 1.1E-03 | -1.0 | 9.7E-01 | 9.9E-01 |
| AT1G61480 | AT1G61480 | S-locus lectin protein kinase family protein                                              | -4.1 | 4.6E-04 | 2.6E-03 | -1.3 | 3.5E-01 | 6.9E-01 |
| ATCG00630 | PSAJ      | PSAJ                                                                                      | -4.1 | 1.1E-02 | 3.6E-02 | -1.2 | 8.2E-01 | 9.4E-01 |
| AT3G50120 | AT3G50120 | transmembrane protein, putative (DUF247)                                                  | -4.0 | 6.7E-09 | 1.9E-07 | -1.4 | 3.6E-02 | 2.5E-01 |
| AT4G22230 | AT4G22230 | defensin-like protein                                                                     | -4.0 | 3.8E-05 | 3.1E-04 | -1.2 | 5.0E-01 | 7.8E-01 |
| AT3G27490 | AT3G27490 | Cysteine/Histidine-rich C1 domain family protein                                          | -4.0 | 3.5E-03 | 1.4E-02 | 1.4  | 4.7E-01 | 7.7E-01 |
| AT1G48670 | AT1G48670 | auxin-responsive GH3 family protein                                                       | -4.0 | 6.4E-05 | 4.9E-04 | -1.0 | 8.6E-01 | 9.6E-01 |
| AT3G59440 | AT3G59440 | Calcium-binding EF-hand family protein                                                    | -4.0 | 1.5E-03 | 6.9E-03 | -1.4 | 2.5E-01 | 6.0E-01 |
| AT1G12080 | AT1G12080 | Vacuolar calcium-binding protein-like protein                                             | -4.0 | 9.6E-10 | 3.5E-08 | -1.7 | 3.1E-03 | 7.1E-02 |
| AT2G33230 | YUCA 7    | YUCA 7                                                                                    | -4.0 | 4.6E-03 | 1.7E-02 | -2.1 | 4.4E-02 | 2.7E-01 |
| AT4G21830 | MSTRB7    | methionine sulfoxide reductase B7                                                         | -4.0 | 6.6E-06 | 7.1E-05 | -1.2 | 5.0E-01 | 7.9E-01 |
| ATCG00140 | ATPH      | ATP synthase subunit C family protein                                                     | -4.0 | 8.9E-03 | 3.0E-02 | 1.3  | 6.5E-01 | 8.7E-01 |
| AT2G31540 | AT2G31540 | GDSL-like Lipase/Acylhydrolase superfamily protein                                        | -4.0 | 7.8E-05 | 5.7E-04 | -1.5 | 1.3E-01 | 4.5E-01 |
| AT3G24450 | AT3G24450 | Heavy metal transport/detoxification superfamily protein                                  | -4.0 | 5.8E-11 | 3.1E-09 | -1.7 | 3.7E-04 | 2.0E-02 |
| AT1G69150 | AT1G69150 | Cysteine/Histidine-rich C1 domain family protein                                          | -3.9 | 5.2E-04 | 2.8E-03 | 1.2  | 5.0E-01 | 7.9E-01 |
| AT5G04180 | ACA3      | alpha carbonic anhydrase 3                                                                | -3.9 | 3.1E-04 | 1.8E-03 | 1.1  | 6.6E-01 | 8.7E-01 |
| ATMG01390 | RRN18     |                                                                                           | -3.9 | 6.0E-03 | 2.2E-02 | 1.0  | 9.2E-01 | 9.8E-01 |
| AT2G18010 | AT2G18010 | SAUR-like auxin-responsive protein family                                                 | -3.9 | 2.8E-03 | 1.2E-02 | -1.4 | 3.2E-01 | 6.6E-01 |
| AT5G16170 | AT5G16170 | Core-2/l-branching beta-1,6-N-acetylglucosaminyltransferase family protein                | -3.9 | 8.9E-09 | 2.4E-07 | -1.5 | 7.7E-03 | 1.1E-01 |
| AT2G41480 | AT2G41480 | peroxidase superfamily protein                                                            | -3.9 | 5.3E-05 | 4.2E-04 | -1.5 | 9.3E-02 | 3.9E-01 |
| AT3G49950 | AT3G49950 | GRAS family transcription factor                                                          | -3.8 | 6.3E-04 | 3.3E-03 | -1.4 | 3.4E-01 | 6.8E-01 |
| AT5G23980 | FRO4      | ferric reduction oxidase 4                                                                | -3.8 | 2.0E-03 | 8.8E-03 | -1.6 | 2.0E-01 | 5.4E-01 |

|           |           |                                                                                           |      |         |         |      |         |         |
|-----------|-----------|-------------------------------------------------------------------------------------------|------|---------|---------|------|---------|---------|
| AT3G50290 | AT3G50290 | HXXXD-type acyl-transferase family protein                                                | -3.8 | 1.0E-04 | 7.1E-04 | -1.4 | 1.2E-01 | 4.4E-01 |
| AT2G34390 | NIP2      |                                                                                           | -3.8 | 7.8E-03 | 2.7E-02 | -1.7 | 1.5E-01 | 4.9E-01 |
| AT3G49620 | DIN11     | 2-oxoglutarate (2OG) and Fe(II)-dependent oxygenase superfamily protein                   | -3.8 | 9.7E-05 | 6.9E-04 | -1.6 | 6.6E-02 | 3.3E-01 |
| AT1G09400 | AT1G09400 | FMN-linked oxidoreductases superfamily protein                                            | -3.8 | 2.7E-03 | 1.1E-02 | -1.7 | 1.5E-01 | 4.8E-01 |
| AT2G14900 | AT2G14900 | Gibberellin-regulated family protein                                                      | -3.8 | 5.1E-10 | 2.1E-08 | -1.5 | 8.0E-03 | 1.1E-01 |
| AT5G19110 | AT5G19110 | Eukaryotic aspartyl protease family protein                                               | -3.8 | 3.6E-03 | 1.4E-02 | -1.2 | 6.7E-01 | 8.8E-01 |
| AT5G14180 | MPL1      | Myzus persicae-induced lipase 1                                                           | -3.8 | 2.5E-11 | 1.5E-09 | -1.5 | 1.6E-03 | 4.8E-02 |
| AT2G22122 | AT2G22122 | hypothetical protein                                                                      | -3.7 | 2.7E-10 | 1.2E-08 | -1.7 | 9.3E-04 | 3.5E-02 |
| AT4G12520 | AT4G12520 | Bifunctional inhibitor/lipid-transfer protein/seed storage 2S albumin superfamily protein | -3.7 | 1.4E-07 | 2.5E-06 | -1.6 | 1.2E-02 | 1.4E-01 |
| AT1G53700 | WAG1      | WAG 1                                                                                     | -3.7 | 4.4E-07 | 6.9E-06 | -1.1 | 6.2E-01 | 8.5E-01 |
| ATMG00880 | ORF187    | hypothetical protein                                                                      | -3.7 | 1.4E-02 | 4.2E-02 | 1.3  | 6.1E-01 | 8.5E-01 |
| AT2G46990 | IAA20     | indole-3-acetic acid inducible 20                                                         | -3.7 | 1.0E-04 | 7.4E-04 | -1.9 | 2.6E-02 | 2.1E-01 |
| AT4G16515 | RGF6      | root meristem growth factor                                                               | -3.7 | 1.8E-05 | 1.7E-04 | -1.6 | 4.9E-02 | 2.9E-01 |
| AT1G15640 | AT1G15640 | transmembrane protein                                                                     | -3.7 | 3.2E-05 | 2.7E-04 | 1.0  | 9.2E-01 | 9.8E-01 |
| AT2G18620 | AT2G18620 | Terpenoid synthases superfamily protein                                                   | -3.7 | 1.3E-06 | 1.7E-05 | -1.2 | 4.3E-01 | 7.4E-01 |
| AT5G20710 | BGAL7     | beta-galactosidase 7                                                                      | -3.6 | 4.4E-07 | 7.0E-06 | -1.7 | 1.1E-02 | 1.4E-01 |
| AT5G42380 | CML37     | calmodulin like 37                                                                        | -3.6 | 1.7E-02 | 4.9E-02 | -4.2 | 1.2E-02 | 1.4E-01 |
| AT1G09350 | GolS3     | galactinol synthase 3                                                                     | -3.6 | 3.5E-04 | 2.0E-03 | -1.4 | 2.4E-01 | 5.9E-01 |
| AT4G32280 | IAA29     | indole-3-acetic acid inducible 29                                                         | -3.6 | 2.7E-05 | 2.4E-04 | 1.0  | 9.1E-01 | 9.8E-01 |
| AT1G21520 | AT1G21520 | hypothetical protein                                                                      | -3.6 | 1.4E-03 | 6.3E-03 | -1.1 | 7.2E-01 | 9.0E-01 |
| AT3G03260 | HDG8      | homeodomain GLABROUS 8                                                                    | -3.6 | 5.4E-03 | 2.0E-02 | -3.9 | 7.6E-03 | 1.1E-01 |
| AT5G24960 | CYP71A14  | cytochrome P450, family 71, subfamily A, polypeptide 14                                   | -3.6 | 5.0E-04 | 2.7E-03 | -1.1 | 6.3E-01 | 8.6E-01 |
| AT4G37970 | CAD6      | cinnamyl alcohol dehydrogenase 6                                                          | -3.6 | 1.1E-03 | 5.4E-03 | 1.0  | 9.9E-01 | 1.0E+00 |
| AT4G20040 | AT4G20040 | Pectin lyase-like superfamily protein                                                     | -3.6 | 1.3E-04 | 8.7E-04 | -1.1 | 6.3E-01 | 8.6E-01 |
| AT1G35250 | AT1G35250 | Thioesterase superfamily protein                                                          | -3.6 | 4.6E-05 | 3.7E-04 | -1.2 | 4.5E-01 | 7.6E-01 |
| AT4G26320 | AGP13     | arabinogalactan protein 13                                                                | -3.5 | 9.5E-08 | 1.8E-06 | -1.4 | 4.1E-02 | 2.6E-01 |
| AT5G02540 | AT5G02540 | NAD(P)-binding Rossmann-fold superfamily protein                                          | -3.5 | 3.8E-04 | 2.2E-03 | 1.1  | 7.4E-01 | 9.1E-01 |
| AT4G15290 | ATCSLB05  | Cellulose synthase family protein                                                         | -3.5 | 9.4E-07 | 1.3E-05 | -1.4 | 7.5E-02 | 3.5E-01 |
| AT1G66930 | AT1G66930 | Protein kinase superfamily protein                                                        | -3.5 | 2.0E-05 | 1.8E-04 | -1.5 | 9.1E-02 | 3.8E-01 |
| AT1G63710 | CYP86A7   | cytochrome P450, family 86, subfamily A, polypeptide 7                                    | -3.5 | 1.6E-02 | 4.7E-02 | -1.6 | 2.7E-01 | 6.2E-01 |
| AT5G02580 | AT5G02580 | argininosuccinate lyase                                                                   | -3.5 | 4.1E-06 | 4.7E-05 | -1.5 | 3.1E-02 | 2.3E-01 |
| AT5G52790 | AT5G52790 | CBS domain protein with a domain protein (DUF21)                                          | -3.5 | 8.2E-09 | 2.2E-07 | -1.2 | 2.4E-01 | 5.9E-01 |
| AT4G14819 | AT4G14819 | hypothetical protein (DUF1677)                                                            | -3.5 | 1.6E-04 | 1.1E-03 | -1.2 | 5.2E-01 | 8.0E-01 |
| AT4G11320 | AT4G11320 | Papain family cysteine protease                                                           | -3.5 | 2.3E-09 | 7.7E-08 | -1.4 | 4.4E-02 | 2.7E-01 |
| AT5G26070 | AT5G26070 | hydroxyproline-rich glycoprotein family protein                                           | -3.5 | 5.0E-03 | 1.8E-02 | -3.5 | 3.0E-03 | 7.0E-02 |
| AT1G43800 | FTM1      | Plant stearyl-acyl-carrier-protein desaturase family protein                              | -3.5 | 1.5E-03 | 6.7E-03 | -2.3 | 1.6E-02 | 1.6E-01 |
| AT3G59730 | AT3G59730 | Concanavalin A-like lectin protein kinase family protein                                  | -3.5 | 2.8E-04 | 1.7E-03 | -1.5 | 1.2E-01 | 4.4E-01 |
| AT1G35210 | AT1G35210 | hypothetical protein                                                                      | -3.4 | 1.2E-02 | 3.9E-02 | -3.1 | 1.9E-02 | 1.8E-01 |
| AT3G05950 | AT3G05950 | RmlC-like cupins superfamily protein                                                      | -3.4 | 4.6E-03 | 1.7E-02 | -2.6 | 1.1E-02 | 1.3E-01 |
| AT1G53830 | PME2      | pectin methylesterase 2                                                                   | -3.4 | 1.8E-12 | 1.5E-10 | -1.4 | 2.5E-03 | 6.2E-02 |
| AT2G35750 | AT2G35750 | transmembrane protein                                                                     | -3.4 | 4.6E-05 | 3.7E-04 | -1.1 | 7.4E-01 | 9.1E-01 |
| AT1G11120 | AT1G11120 | CTTNBP 2 amino-terminal-like protein                                                      | -3.4 | 1.2E-07 | 2.3E-06 | -1.6 | 7.7E-03 | 1.1E-01 |
| AT1G66460 | AT1G66460 | Protein kinase superfamily protein                                                        | -3.4 | 4.2E-04 | 2.4E-03 | 1.2  | 4.7E-01 | 7.7E-01 |
| AT1G03820 | AT1G03820 | E6-like protein                                                                           | -3.4 | 6.5E-07 | 9.7E-06 | -2.0 | 9.3E-04 | 3.5E-02 |
| AT4G14130 | XTH15     | xyloglucan endotransglucosylase/hydrolase 15                                              | -3.4 | 3.3E-07 | 5.4E-06 | 1.0  | 9.2E-01 | 9.8E-01 |
| AT4G02290 | GH9B13    | glycosyl hydrolase 9B13                                                                   | -3.4 | 3.1E-10 | 1.3E-08 | -1.2 | 9.0E-02 | 3.8E-01 |
| AT2G39370 | MAKR4     | membrane-associated kinase regulator                                                      | -3.3 | 1.8E-06 | 2.3E-05 | 1.2  | 4.3E-01 | 7.4E-01 |
| AT1G61840 | AT1G61840 | Cysteine/Histidine-rich C1 domain family protein                                          | -3.3 | 1.8E-05 | 1.6E-04 | -1.4 | 1.0E-01 | 4.1E-01 |
| ATMG01360 | COX1      | cytochrome oxidase                                                                        | -3.3 | 1.6E-02 | 4.7E-02 | 1.1  | 7.7E-01 | 9.3E-01 |
| AT2G24300 | AT2G24300 | Calmodulin-binding protein                                                                | -3.3 | 2.1E-10 | 9.4E-09 | -1.1 | 5.1E-01 | 8.0E-01 |
| AT4G08620 | SULTR1    |                                                                                           | -3.3 | 7.8E-05 | 5.7E-04 | -1.4 | 1.4E-01 | 4.7E-01 |
| AT4G15280 | UGT71B5   | UDP-glucosyl transferase 71B5                                                             | -3.3 | 2.1E-03 | 9.2E-03 | -1.7 | 9.9E-02 | 4.0E-01 |
| AT1G60450 | GolS7     | galactinol synthase 7                                                                     | -3.3 | 1.5E-02 | 4.4E-02 | -2.3 | 2.9E-02 | 2.2E-01 |
| AT2G17890 | CPK16     | calcium-dependent protein kinase 16                                                       | -3.3 | 1.8E-04 | 1.1E-03 | -1.6 | 5.6E-02 | 3.1E-01 |
| AT5G60660 | PIP2      |                                                                                           | -3.3 | 6.7E-09 | 1.9E-07 | -1.8 | 4.5E-04 | 2.2E-02 |
| AT5G65390 | AGP7      | arabinogalactan protein 7                                                                 | -3.3 | 6.4E-09 | 1.8E-07 | -1.2 | 2.5E-01 | 6.0E-01 |
| AT3G05150 | AT3G05150 | Major facilitator superfamily protein                                                     | -3.3 | 5.1E-15 | 8.8E-13 | -1.5 | 1.3E-05 | 1.9E-03 |
| AT1G67000 | AT1G67000 | Protein kinase superfamily protein                                                        | -3.3 | 7.3E-04 | 3.8E-03 | -2.2 | 1.1E-02 | 1.3E-01 |
| AT1G09860 | PUP16     | purine permease 16                                                                        | -3.3 | 2.0E-05 | 1.8E-04 | -1.7 | 2.3E-02 | 2.0E-01 |
| AT5G42580 | CYP705A12 | cytochrome P450, family 705, subfamily A, polypeptide 12                                  | -3.3 | 1.2E-05 | 1.2E-04 | -2.0 | 2.9E-03 | 6.8E-02 |
| AT4G27440 | PORB      | protochlorophyllide oxidoreductase B                                                      | -3.3 | 5.9E-12 | 4.1E-10 | -1.2 | 1.1E-01 | 4.3E-01 |
| AT5G24100 | AT5G24100 | Leucine-rich repeat protein kinase family protein                                         | -3.3 | 1.3E-09 | 4.6E-08 | -1.4 | 1.0E-02 | 1.3E-01 |
| AT1G65310 | XTH17     | xyloglucan endotransglucosylase/hydrolase 17                                              | -3.3 | 1.4E-05 | 1.3E-04 | -1.6 | 4.6E-02 | 2.8E-01 |
| AT3G29370 | P1R3      | hypothetical protein                                                                      | -3.3 | 5.7E-06 | 6.2E-05 | -1.4 | 1.1E-01 | 4.1E-01 |
| AT2G37130 | AT2G37130 | Peroxidase superfamily protein                                                            | -3.3 | 1.4E-07 | 2.5E-06 | -1.5 | 1.7E-02 | 1.7E-01 |
| AT4G25560 | LAF1      | myb domain protein 18                                                                     | -3.3 | 7.3E-05 | 5.4E-04 | -1.2 | 4.2E-01 | 7.4E-01 |
| AT2G04500 | AT2G04500 | Cysteine/Histidine-rich C1 domain family protein                                          | -3.3 | 2.2E-09 | 7.3E-08 | -1.3 | 3.8E-02 | 2.6E-01 |
| AT4G11190 | AT4G11190 | Disease resistance-responsive (dirigent-like protein) family protein                      | -3.3 | 2.0E-05 | 1.8E-04 | -1.6 | 5.2E-02 | 3.0E-01 |
| AT3G19430 | AT3G19430 | late embryogenesis abundant protein-related / LEA protein-like protein                    | -3.3 | 1.0E-03 | 5.1E-03 | -1.6 | 1.5E-01 | 4.9E-01 |
| AT4G15390 | AT4G15390 | HXXXD-type acyl-transferase family protein                                                | -3.3 | 7.4E-07 | 1.1E-05 | -1.9 | 2.2E-03 | 5.9E-02 |
| AT1G22110 | AT1G22110 | structural constituent of ribosome                                                        | -3.2 | 6.3E-08 | 1.3E-06 | -1.9 | 1.1E-04 | 9.1E-03 |
| AT2G01200 | IAA32     | indole-3-acetic acid inducible 32                                                         | -3.2 | 1.1E-03 | 5.3E-03 | -1.0 | 9.5E-01 | 9.9E-01 |
| AT1G63600 | AT1G63600 | Receptor-like protein kinase-related family protein                                       | -3.2 | 3.2E-03 | 1.3E-02 | -1.0 | 9.7E-01 | 1.0E+00 |
| AT3G18450 | AT3G18450 | PLAC8 family protein                                                                      | -3.2 | 1.2E-02 | 3.9E-02 | -1.4 | 2.9E-01 | 6.4E-01 |

|           |                  |                                                                                   |      |         |         |      |         |         |
|-----------|------------------|-----------------------------------------------------------------------------------|------|---------|---------|------|---------|---------|
| AT4G16780 | <i>HB-2</i>      | homeobox protein 2                                                                | -3.2 | 8.7E-04 | 4.4E-03 | -2.2 | 1.5E-02 | 1.6E-01 |
| AT1G49130 | <i>BBX17</i>     | B-box type zinc finger protein with CCT domain-containing protein                 | -3.2 | 3.2E-08 | 7.3E-07 | -1.4 | 3.6E-02 | 2.5E-01 |
| AT4G10270 | <i>AT4G10270</i> | Wound-responsive family protein                                                   | -3.2 | 5.2E-04 | 2.8E-03 | -1.9 | 2.1E-02 | 1.9E-01 |
| AT1G51530 | <i>AT1G51530</i> | RNA-binding (RRM/RBD/RNP motifs) family protein                                   | -3.2 | 2.3E-03 | 9.8E-03 | -2.4 | 1.7E-02 | 1.7E-01 |
| AT1G11545 | <i>XTH8</i>      | xyloglucan endotransglucosylase/hydrolase 8                                       | -3.2 | 1.0E-12 | 8.9E-11 | -1.4 | 2.0E-03 | 5.5E-02 |
| AT5G45210 | <i>AT5G45210</i> | Disease resistance protein (TIR-NBS-LRR class) family                             | -3.2 | 1.2E-05 | 1.2E-04 | 1.0  | 9.3E-01 | 9.9E-01 |
| AT3G13650 | <i>AT3G13650</i> | Disease resistance-responsive (dirigent-like protein) family protein              | -3.1 | 4.1E-07 | 6.6E-06 | -1.2 | 2.6E-01 | 6.0E-01 |
| AT1G18140 | <i>LAC1</i>      | laccase 1                                                                         | -3.1 | 1.1E-06 | 1.5E-05 | -1.2 | 3.2E-01 | 6.7E-01 |
| AT5G67020 | <i>AT5G67020</i> | hypothetical protein                                                              | -3.1 | 1.6E-04 | 1.1E-03 | 1.2  | 4.3E-01 | 7.4E-01 |
| AT5G37450 | <i>AT5G37450</i> | Leucine-rich repeat protein kinase family protein                                 | -3.1 | 2.2E-03 | 9.4E-03 | -2.2 | 9.7E-03 | 1.3E-01 |
| AT3G32030 | <i>AT3G32030</i> | Terpenoid cyclases/Protein prenyltransferases superfamily protein                 | -3.1 | 3.2E-05 | 2.7E-04 | 1.1  | 6.2E-01 | 8.6E-01 |
| AT1G61750 | <i>AT1G61750</i> | Receptor-like protein kinase-related family protein                               | -3.1 | 1.0E-03 | 5.0E-03 | 1.0  | 9.3E-01 | 9.8E-01 |
| AT4G37400 | <i>CYP81F3</i>   | cytochrome P450, family 81, subfamily F, polypeptide 3                            | -3.1 | 3.5E-07 | 5.7E-06 | -1.4 | 4.4E-02 | 2.7E-01 |
| AT5G28650 | <i>WRKY74</i>    | WRKY DNA-binding protein 74                                                       | -3.1 | 2.6E-03 | 1.1E-02 | -1.4 | 2.2E-01 | 5.8E-01 |
| AT1G16160 | <i>WAKL5</i>     | wall associated kinase-like 5                                                     | -3.1 | 4.8E-07 | 7.5E-06 | -1.1 | 4.1E-01 | 7.3E-01 |
| AT1G76610 | <i>AT1G76610</i> | MIZU-KUSSEI-like protein (Protein of unknown function, DUF617)                    | -3.1 | 4.6E-03 | 1.7E-02 | -1.2 | 6.2E-01 | 8.6E-01 |
| AT4G21730 | <i>AT4G21730</i> | pseudogene of AAA-type ATPase family protein                                      | -3.1 | 4.9E-06 | 5.5E-05 | -1.6 | 1.9E-02 | 1.8E-01 |
| AT5G38100 | <i>AT5G38100</i> | S-adenosyl-L-methionine-dependent methyltransferases superfamily protein          | -3.1 | 8.6E-05 | 6.2E-04 | -1.6 | 4.9E-02 | 2.9E-01 |
| AT3G21330 | <i>AT3G21330</i> | basic helix-loop-helix (bHLH) DNA-binding superfamily protein                     | -3.1 | 5.1E-05 | 4.0E-04 | -1.1 | 7.3E-01 | 9.1E-01 |
| AT1G10560 | <i>PUB18</i>     | plant U-box 18                                                                    | -3.1 | 1.7E-04 | 1.1E-03 | -1.6 | 7.1E-02 | 3.4E-01 |
| AT3G18530 | <i>AT3G18530</i> | ARM repeat superfamily protein                                                    | -3.1 | 5.5E-03 | 2.0E-02 | -1.3 | 4.2E-01 | 7.4E-01 |
| AT5G53660 | <i>GRF7</i>      | growth-regulating factor 7                                                        | -3.1 | 4.5E-03 | 1.7E-02 | -2.2 | 1.0E-02 | 1.3E-01 |
| AT1G80240 | <i>DGR1</i>      | choice-of-anchor C domain protein, putative (Protein of unknown function, DUF642) | -3.1 | 2.0E-06 | 2.6E-05 | -1.6 | 1.5E-02 | 1.6E-01 |
| AT5G48010 | <i>THAS1</i>     | thalianol synthase 1                                                              | -3.1 | 2.1E-05 | 1.9E-04 | -1.3 | 1.8E-01 | 5.2E-01 |
| AT1G05660 | <i>AT1G05660</i> | Pectin lyase-like superfamily protein                                             | -3.1 | 1.4E-04 | 9.3E-04 | -1.1 | 6.7E-01 | 8.8E-01 |
| AT5G05965 | <i>AT5G05965</i> | cell wall RBR3-like protein                                                       | -3.1 | 5.5E-05 | 4.3E-04 | -2.1 | 3.3E-03 | 7.2E-02 |
| AT3G08860 | <i>PYD4</i>      | PYRIMIDINE 4                                                                      | -3.1 | 2.3E-06 | 2.9E-05 | 1.4  | 5.1E-02 | 2.9E-01 |
| AT5G19810 | <i>AT5G19810</i> | Proline-rich extensin-like family protein                                         | -3.1 | 1.8E-04 | 1.1E-03 | -1.8 | 2.5E-02 | 2.1E-01 |
| AT2G14890 | <i>AGP9</i>      | arabinogalactan protein 9                                                         | -3.1 | 5.7E-11 | 3.1E-09 | -1.4 | 4.6E-03 | 8.6E-02 |
| AT3G12710 | <i>AT3G12710</i> | DNA glycosylase superfamily protein                                               | -3.0 | 2.8E-10 | 1.2E-08 | -1.3 | 5.3E-02 | 3.0E-01 |
| AT3G63350 | <i>AT-HSFA7B</i> | winged-helix DNA-binding transcription factor family protein                      | -3.0 | 9.3E-04 | 4.6E-03 | -1.7 | 6.5E-02 | 3.3E-01 |
| AT3G50140 | <i>AT3G50140</i> | transmembrane protein, putative (DUF247)                                          | -3.0 | 1.5E-07 | 2.7E-06 | -1.4 | 3.0E-02 | 2.2E-01 |
| AT1G64405 | <i>AT1G64405</i> | hypothetical protein                                                              | -3.0 | 1.9E-04 | 1.2E-03 | 1.0  | 9.3E-01 | 9.8E-01 |
| AT2G14210 | <i>AGL44</i>     | AGAMOUS-like 44                                                                   | -3.0 | 4.1E-05 | 3.4E-04 | -1.7 | 3.0E-02 | 2.3E-01 |
| AT5G22570 | <i>WRKY38</i>    | WRKY DNA-binding protein 38                                                       | -3.0 | 6.4E-03 | 2.3E-02 | -1.2 | 5.3E-01 | 8.1E-01 |
| AT3G12610 | <i>DRT100</i>    | Leucine-rich repeat (LRR) family protein                                          | -3.0 | 2.7E-11 | 1.6E-09 | -1.3 | 2.3E-02 | 2.0E-01 |
| AT3G32047 | <i>AT3G32047</i> | Cytochrome P450 superfamily protein                                               | -3.0 | 1.9E-04 | 1.2E-03 | 1.2  | 5.2E-01 | 8.0E-01 |
| AT5G43690 | <i>AT5G43690</i> | P-loop containing nucleoside triphosphate hydrolases superfamily protein          | -3.0 | 9.5E-04 | 4.7E-03 | -2.3 | 4.3E-03 | 8.3E-02 |
| AT4G32205 | <i>AT4G32205</i> | transposable_element_gene                                                         | -3.0 | 2.2E-03 | 9.2E-03 | -1.2 | 5.9E-01 | 8.4E-01 |
| AT3G60160 | <i>ABCC9</i>     | multidrug resistance-associated protein 9                                         | -3.0 | 1.5E-04 | 1.0E-03 | 1.2  | 4.9E-01 | 7.8E-01 |
| AT4G01430 | <i>UMAMIT29</i>  | nodulin MtN21 /EamA-like transporter family protein                               | -3.0 | 1.2E-06 | 1.6E-05 | -1.1 | 5.8E-01 | 8.3E-01 |
| AT4G29690 | <i>AT4G29690</i> | Alkaline-phosphatase-like family protein                                          | -3.0 | 8.0E-04 | 4.1E-03 | -1.3 | 4.0E-01 | 7.3E-01 |
| AT2G31085 | <i>CLE6</i>      | CLAVATA3/ESR-RELATED 6                                                            | -3.0 | 2.9E-04 | 1.7E-03 | -1.1 | 7.2E-01 | 9.0E-01 |
| AT5G06730 | <i>AT5G06730</i> | Peroxidase superfamily protein                                                    | -3.0 | 6.7E-04 | 3.5E-03 | -1.6 | 3.5E-02 | 2.5E-01 |
| AT4G08112 | <i>AT4G08112</i> | transposable_element_gene                                                         | -3.0 | 3.3E-03 | 1.3E-02 | -2.4 | 2.0E-02 | 1.8E-01 |
| ATMG00020 | <i>RRN26</i>     |                                                                                   | -3.0 | 8.6E-03 | 2.9E-02 | 1.1  | 7.5E-01 | 9.1E-01 |
| AT4G04710 | <i>CPK22</i>     | calcium-dependent kinase-like protein                                             | -3.0 | 6.3E-05 | 4.8E-04 | -1.5 | 6.4E-02 | 3.2E-01 |
| AT1G12805 | <i>AT1G12805</i> | nucleotide binding protein                                                        | -3.0 | 6.7E-03 | 2.4E-02 | -2.5 | 7.5E-03 | 1.1E-01 |
| AT2G16980 | <i>AT2G16980</i> | Major facilitator superfamily protein                                             | -3.0 | 7.3E-08 | 1.5E-06 | -1.5 | 1.6E-02 | 1.6E-01 |
| AT5G38970 | <i>BR6OX1</i>    | brassinosteroid-6-oxidase 1                                                       | -3.0 | 6.6E-11 | 3.4E-09 | -1.4 | 3.4E-03 | 7.3E-02 |
| AT5G15265 | <i>AT5G15265</i> | transmembrane protein                                                             | -3.0 | 4.7E-06 | 5.3E-05 | -1.4 | 5.3E-02 | 3.0E-01 |
| AT5G23220 | <i>NIC3</i>      | nicotinamidase 3                                                                  | -3.0 | 8.4E-06 | 8.7E-05 | 1.2  | 4.1E-01 | 7.3E-01 |
| AT3G52770 | <i>ZPR3</i>      | binding protein                                                                   | -3.0 | 1.3E-04 | 8.8E-04 | -1.3 | 2.4E-01 | 6.0E-01 |
| AT5G62170 | <i>TRM25</i>     | LOW protein: M-phase inducer phosphatase-like protein                             | -3.0 | 2.0E-08 | 4.8E-07 | -1.2 | 1.3E-01 | 4.6E-01 |
| AT2G37330 | <i>ALS3</i>      | aluminum sensitive 3                                                              | -2.9 | 2.1E-05 | 1.9E-04 | -1.9 | 4.9E-03 | 8.9E-02 |
| AT1G75780 | <i>TUB1</i>      | tubulin beta-1 chain                                                              | -2.9 | 5.0E-09 | 1.5E-07 | -1.1 | 4.6E-01 | 7.6E-01 |
| AT1G07690 | <i>AT1G07690</i> | transmembrane protein                                                             | -2.9 | 4.5E-03 | 1.7E-02 | -1.5 | 2.0E-01 | 5.5E-01 |
| AT3G26170 | <i>CYP71B19</i>  | cytochrome P450, family 71, subfamily B, polypeptide 19                           | -2.9 | 6.4E-05 | 4.9E-04 | -1.0 | 8.3E-01 | 9.5E-01 |
| AT2G18180 | <i>AT2G18180</i> | Sec14p-like phosphatidylinositol transfer family protein                          | -2.9 | 1.8E-03 | 8.0E-03 | -1.8 | 3.8E-02 | 2.5E-01 |
| AT1G02575 | <i>AT1G02575</i> | transmembrane protein                                                             | -2.9 | 8.0E-03 | 2.7E-02 | -2.2 | 3.4E-02 | 2.4E-01 |
| AT1G61160 | <i>AT1G61160</i> | retrotransposon gag                                                               | -2.9 | 8.1E-05 | 5.9E-04 | -1.4 | 1.3E-01 | 4.6E-01 |
| AT3G06435 | <i>AT3G06435</i> | Expressed protein                                                                 | -2.9 | 9.8E-05 | 6.9E-04 | -1.6 | 4.0E-02 | 2.6E-01 |
| AT2G35743 | <i>AT2G35743</i> |                                                                                   | -2.9 | 1.5E-02 | 4.6E-02 | -1.6 | 3.2E-01 | 6.7E-01 |
| AT3G45130 | <i>LAS1</i>      | lanosterol synthase 1                                                             | -2.9 | 5.9E-04 | 3.1E-03 | 1.0  | 8.6E-01 | 9.6E-01 |
| AT3G48490 | <i>AT3G48490</i> | hypothetical protein                                                              | -2.9 | 1.6E-05 | 1.5E-04 | -1.3 | 1.7E-01 | 5.2E-01 |
| AT2G26370 | <i>AT2G26370</i> | MD-2-related lipid recognition domain-containing protein                          | -2.9 | 4.1E-06 | 4.7E-05 | -2.0 | 8.1E-04 | 3.3E-02 |
| AT5G50335 | <i>AT5G50335</i> | hypothetical protein                                                              | -2.9 | 1.2E-03 | 5.7E-03 | 1.2  | 5.7E-01 | 8.3E-01 |



|           |                  |                                                                                                 |      |         |         |      |         |         |
|-----------|------------------|-------------------------------------------------------------------------------------------------|------|---------|---------|------|---------|---------|
| AT1G73120 | <i>AT1G73120</i> | F-box/RNI superfamily protein                                                                   | -2.9 | 3.1E-03 | 1.3E-02 | -2.0 | 4.1E-02 | 2.6E-01 |
| AT2G14960 | <i>GH3.1</i>     | Auxin-responsive GH3 family protein                                                             | -2.9 | 9.2E-04 | 4.6E-03 | -1.3 | 3.4E-01 | 6.8E-01 |
| AT5G01335 | <i>AT5G01335</i> | transposable_element_gene                                                                       | -2.9 | 9.4E-03 | 3.1E-02 | -1.9 | 3.6E-02 | 2.5E-01 |
| AT2G34700 | <i>AT2G34700</i> | Pollen Ole e 1 allergen and extensin family protein                                             | -2.9 | 3.6E-03 | 1.4E-02 | -1.3 | 4.6E-01 | 7.6E-01 |
| AT4G37870 | <i>PCK1</i>      | phosphoenolpyruvate carboxykinase 1                                                             | -2.9 | 1.1E-10 | 5.6E-09 | -1.5 | 2.0E-03 | 5.6E-02 |
| AT2G43050 | <i>ATPMEPCRD</i> | Plant invertase/pectin methylesterase inhibitor superfamily                                     | -2.9 | 1.9E-05 | 1.8E-04 | -1.0 | 9.1E-01 | 9.8E-01 |
| AT5G47450 | <i>TIP2</i>      |                                                                                                 | -2.9 | 9.7E-07 | 1.4E-05 | -1.3 | 1.5E-01 | 4.8E-01 |
| AT5G18840 | <i>AT5G18840</i> | Major facilitator superfamily protein                                                           | -2.9 | 4.0E-03 | 1.5E-02 | 1.2  | 6.1E-01 | 8.5E-01 |
| AT1G20190 | <i>EXPA11</i>    | expansin 11                                                                                     | -2.9 | 5.2E-07 | 8.0E-06 | -1.3 | 1.2E-01 | 4.4E-01 |
| AT3G01516 | <i>AT3G01516</i> | transmembrane protein                                                                           | -2.9 | 2.1E-03 | 9.1E-03 | -1.3 | 3.5E-01 | 6.9E-01 |
| AT2G39920 | <i>AT2G39920</i> | HAD superfamily, subfamily IIIB acid phosphatase                                                | -2.8 | 1.1E-02 | 3.5E-02 | -1.1 | 7.0E-01 | 8.9E-01 |
| AT1G77640 | <i>AT1G77640</i> | Integrase-type DNA-binding superfamily protein                                                  | -2.8 | 5.1E-04 | 2.8E-03 | -1.4 | 1.9E-01 | 5.4E-01 |
| AT3G21620 | <i>AT3G21620</i> | ERD (early-responsive to dehydration stress) family protein                                     | -2.8 | 1.3E-06 | 1.8E-05 | -1.4 | 2.7E-02 | 2.1E-01 |
| AT1G80160 | <i>GLY17</i>     | Lactoylglutathione lyase / glyoxalase I family                                                  | -2.8 | 1.2E-03 | 5.5E-03 | -2.4 | 3.2E-03 | 7.2E-02 |
| AT3G59130 | <i>AT3G59130</i> | Cysteine/Histidine-rich C1 domain family protein                                                | -2.8 | 2.1E-04 | 1.3E-03 | -1.8 | 1.0E-02 | 1.3E-01 |
| AT1G26730 | <i>AT1G26730</i> | EXS (ERD1/XPR1/SYG1) family protein                                                             | -2.8 | 1.6E-05 | 1.5E-04 | -1.6 | 1.1E-02 | 1.3E-01 |
| AT3G20130 | <i>CYP705A22</i> | cytochrome P450, family 705, subfamily A, polypeptide 22                                        | -2.8 | 6.9E-15 | 1.1E-12 | -1.2 | 1.2E-02 | 1.4E-01 |
| AT2G45050 | <i>GATA2</i>     | GATA transcription factor 2                                                                     | -2.8 | 3.1E-09 | 9.7E-08 | -1.2 | 2.2E-01 | 5.6E-01 |
| AT3G28580 | <i>AT3G28580</i> | P-loop containing nucleoside triphosphate hydrolases superfamily protein                        | -2.8 | 9.8E-03 | 3.2E-02 | 1.0  | 9.1E-01 | 9.8E-01 |
| AT5G46330 | <i>FLS2</i>      | Leucine-rich receptor-like protein kinase family protein                                        | -2.8 | 8.9E-08 | 1.7E-06 | -1.1 | 5.4E-01 | 8.1E-01 |
| AT5G48000 | <i>CYP708A2</i>  | cytochrome P450, family 708, subfamily A, polypeptide 2                                         | -2.8 | 2.9E-06 | 3.6E-05 | -1.5 | 1.8E-02 | 1.7E-01 |
| AT2G21880 | <i>RAB7A</i>     | RAB GTPase homolog 7A                                                                           | -2.8 | 3.6E-08 | 7.9E-07 | -1.6 | 1.2E-03 | 4.2E-02 |
| AT2G18800 | <i>XTH21</i>     | xyloglucan endotransglucosylase/hydrolase 21                                                    | -2.8 | 1.7E-05 | 1.6E-04 | -1.3 | 1.2E-01 | 4.4E-01 |
| AT5G26320 | <i>AT5G26320</i> | TRAF-like family protein                                                                        | -2.8 | 1.9E-03 | 8.2E-03 | -1.7 | 6.7E-02 | 3.3E-01 |
| AT2G48080 | <i>AT2G48080</i> | oxidoreductase, 2OG-Fe(II) oxygenase family                                                     | -2.8 | 3.6E-07 | 5.8E-06 | -1.0 | 8.2E-01 | 9.4E-01 |
| AT3G02550 | <i>LBD41</i>     | LOB domain-containing protein 41                                                                | -2.8 | 4.7E-05 | 3.8E-04 | -1.5 | 7.1E-02 | 3.4E-01 |
| AT4G01200 | <i>AT4G01200</i> | Calcium-dependent lipid-binding (CaLB domain) family protein                                    | -2.8 | 9.6E-08 | 1.8E-06 | -1.4 | 2.6E-02 | 2.1E-01 |
| AT1G78860 | <i>AT1G78860</i> | D-mannose binding lectin protein with Apple-like carbohydrate-binding domain-containing protein | -2.8 | 2.4E-04 | 1.5E-03 | -1.1 | 5.6E-01 | 8.3E-01 |
| AT4G08109 | <i>AT4G08109</i> | transposable_element_gene                                                                       | -2.8 | 7.3E-04 | 3.8E-03 | -1.7 | 8.9E-02 | 3.8E-01 |
| AT5G57190 | <i>PSD2</i>      | phosphatidylserine decarboxylase 2                                                              | -2.8 | 8.2E-06 | 8.5E-05 | -1.8 | 3.5E-03 | 7.4E-02 |
| AT1G44800 | <i>SIAR1</i>     | nodulin MtN21 /EamA-like transporter family protein                                             | -2.8 | 4.6E-14 | 5.9E-12 | -1.1 | 2.7E-01 | 6.2E-01 |
| AT1G66800 | <i>AT1G66800</i> | NAD(P)-binding Rossmann-fold superfamily protein                                                | -2.8 | 3.7E-06 | 4.3E-05 | -2.0 | 4.6E-04 | 2.3E-02 |
| AT3G22740 | <i>HMT3</i>      | homocysteine S-methyltransferase 3                                                              | -2.8 | 5.0E-04 | 2.8E-03 | 1.1  | 7.7E-01 | 9.2E-01 |
| AT4G33880 | <i>RSL2</i>      | ROOT HAIR DEFECTIVE 6-LIKE 2                                                                    | -2.8 | 9.4E-06 | 9.5E-05 | -1.6 | 1.6E-02 | 1.6E-01 |
| AT4G10780 | <i>AT4G10780</i> | LRR and NB-ARC domains-containing disease resistance protein                                    | -2.8 | 5.2E-03 | 1.9E-02 | -2.2 | 2.0E-02 | 1.8E-01 |
| AT3G16410 | <i>NSP4</i>      | nitrile specifier protein 4                                                                     | -2.8 | 1.5E-05 | 1.4E-04 | -1.3 | 2.0E-01 | 5.5E-01 |
| AT2G23400 | <i>AT2G23400</i> | Undecaprenyl pyrophosphate synthetase family protein                                            | -2.8 | 9.8E-03 | 3.2E-02 | -1.2 | 4.8E-01 | 7.8E-01 |
| AT4G21745 | <i>AT4G21745</i> | PAK-box/P21-Rho-binding family protein                                                          | -2.7 | 2.1E-04 | 1.3E-03 | -2.0 | 3.7E-03 | 7.7E-02 |
| AT4G26488 | <i>AT4G26488</i> | Natural antisense transcript overlaps with AT4G26490                                            | -2.7 | 1.6E-06 | 2.1E-05 | -1.6 | 7.4E-03 | 1.1E-01 |
| AT5G62420 | <i>AT5G62420</i> | NAD(P)-linked oxidoreductase superfamily protein                                                | -2.7 | 1.4E-05 | 1.3E-04 | -1.4 | 7.8E-02 | 3.6E-01 |
| AT5G18010 | <i>SAUR19</i>    | SAUR-like auxin-responsive protein family                                                       | -2.7 | 2.7E-03 | 1.1E-02 | -1.9 | 3.6E-02 | 2.5E-01 |
| AT5G02020 | <i>SIS</i>       | E3 ubiquitin-protein ligase RLIM-like protein                                                   | -2.7 | 1.4E-09 | 5.0E-08 | -1.1 | 3.0E-01 | 6.4E-01 |
| AT3G32040 | <i>AT3G32040</i> | Terpenoid synthases superfamily protein                                                         | -2.7 | 1.1E-03 | 5.3E-03 | -1.2 | 4.6E-01 | 7.6E-01 |
| AT3G46170 | <i>AT3G46170</i> | NAD(P)-binding Rossmann-fold superfamily protein                                                | -2.7 | 4.3E-03 | 1.6E-02 | 1.0  | 9.3E-01 | 9.8E-01 |
| AT1G68360 | <i>AT1G68360</i> | C2H2 and C2HC zinc fingers superfamily protein                                                  | -2.7 | 3.3E-05 | 2.8E-04 | -1.3 | 1.4E-01 | 4.6E-01 |
| AT5G02760 | <i>AT5G02760</i> | Protein phosphatase 2C family protein                                                           | -2.7 | 1.5E-05 | 1.4E-04 | -1.0 | 8.0E-01 | 9.4E-01 |
| AT3G06990 | <i>AT3G06990</i> | Cysteine/Histidine-rich C1 domain family protein                                                | -2.7 | 8.2E-09 | 2.2E-07 | -1.4 | 7.2E-03 | 1.1E-01 |
| AT5G14340 | <i>MYB40</i>     | myb domain protein 40                                                                           | -2.7 | 2.5E-03 | 1.0E-02 | 1.1  | 6.3E-01 | 8.6E-01 |
| AT4G23870 | <i>AT4G23870</i> | hypothetical protein                                                                            | -2.7 | 1.2E-05 | 1.2E-04 | -1.6 | 1.4E-02 | 1.5E-01 |
| AT1G26890 | <i>AT1G26890</i> | FBD, F-box and Leucine Rich Repeat domains containing protein                                   | -2.7 | 8.0E-04 | 4.1E-03 | -1.8 | 2.0E-02 | 1.8E-01 |
| AT3G45700 | <i>AT3G45700</i> | Major facilitator superfamily protein                                                           | -2.7 | 4.9E-11 | 2.7E-09 | -1.3 | 7.3E-03 | 1.1E-01 |
| AT1G64640 | <i>ENODL8</i>    | early nodulin-like protein 8                                                                    | -2.7 | 6.8E-09 | 1.9E-07 | -1.3 | 3.2E-02 | 2.4E-01 |
| AT3G16390 | <i>NSP3</i>      | nitrile specifier protein 3                                                                     | -2.7 | 2.8E-04 | 1.7E-03 | -1.1 | 7.3E-01 | 9.1E-01 |
| AT5G51190 | <i>AT5G51190</i> | Integrase-type DNA-binding superfamily protein                                                  | -2.7 | 1.2E-02 | 3.9E-02 | -2.7 | 1.1E-02 | 1.4E-01 |
| AT3G42800 | <i>AT3G42800</i> | AF-like protein                                                                                 | -2.7 | 1.8E-04 | 1.2E-03 | -1.6 | 3.9E-02 | 2.6E-01 |
| AT2G46970 | <i>PIL1</i>      | phytochrome interacting factor 3-like 1                                                         | -2.7 | 2.2E-03 | 9.4E-03 | -1.8 | 3.4E-02 | 2.4E-01 |
| AT4G24110 | <i>AT4G24110</i> | NADP-specific glutamate dehydrogenase                                                           | -2.7 | 3.6E-05 | 3.0E-04 | -1.6 | 1.3E-02 | 1.5E-01 |
| AT4G10150 | <i>AT4G10150</i> | RING/U-box superfamily protein                                                                  | -2.7 | 7.6E-04 | 3.9E-03 | -1.8 | 2.8E-02 | 2.2E-01 |
| AT1G74420 | <i>FUT3</i>      | fucosyltransferase 3                                                                            | -2.7 | 1.3E-04 | 8.9E-04 | -1.8 | 9.2E-03 | 1.2E-01 |
| AT1G77870 | <i>MUB5</i>      | membrane-anchored ubiquitin-fold protein 5 precursor                                            | -2.7 | 6.0E-06 | 6.5E-05 | -1.2 | 2.8E-01 | 6.3E-01 |
| AT1G75590 | <i>AT1G75590</i> | SAUR-like auxin-responsive protein family                                                       | -2.7 | 4.8E-05 | 3.8E-04 | -1.1 | 5.9E-01 | 8.4E-01 |
| AT5G14780 | <i>FDH</i>       | formate dehydrogenase                                                                           | -2.7 | 4.8E-08 | 1.0E-06 | 1.1  | 6.7E-01 | 8.8E-01 |
| AT5G13700 | <i>PAO1</i>      | polyamine oxidase 1                                                                             | -2.7 | 9.7E-06 | 9.8E-05 | -1.5 | 1.8E-02 | 1.7E-01 |
| AT5G61520 | <i>AT5G61520</i> | Major facilitator superfamily protein                                                           | -2.7 | 5.4E-08 | 1.1E-06 | -1.2 | 2.7E-01 | 6.1E-01 |
| AT5G22580 | <i>AT5G22580</i> | Stress responsive A/B Barrel Domain-containing protein                                          | -2.7 | 8.1E-06 | 8.4E-05 | -1.5 | 1.9E-02 | 1.8E-01 |
| AT3G18200 | <i>UMAMIT4</i>   | nodulin MtN21 /EamA-like transporter family protein                                             | -2.7 | 1.1E-08 | 3.0E-07 | -1.3 | 2.5E-02 | 2.1E-01 |
| AT4G24275 | <i>AT4G24275</i> | hypothetical protein                                                                            | -2.7 | 3.4E-08 | 7.6E-07 | -1.1 | 3.8E-01 | 7.1E-01 |

|           |                  |                                                                            |      |         |         |      |         |         |
|-----------|------------------|----------------------------------------------------------------------------|------|---------|---------|------|---------|---------|
| AT5G15580 | <i>LNG1</i>      | longifolia1                                                                | -2.7 | 1.2E-09 | 4.5E-08 | -1.1 | 2.5E-01 | 6.0E-01 |
| AT1G19840 | <i>AT1G19840</i> | SAUR-like auxin-responsive protein family                                  | -2.7 | 3.0E-08 | 6.9E-07 | -1.4 | 1.5E-02 | 1.6E-01 |
| AT1G74670 | <i>GASA6</i>     | Gibberellin-regulated family protein                                       | -2.7 | 5.6E-10 | 2.2E-08 | -1.4 | 3.0E-03 | 7.0E-02 |
| AT3G27884 | <i>AT3G27884</i> |                                                                            | -2.6 | 1.8E-04 | 1.2E-03 | -1.3 | 1.8E-01 | 5.2E-01 |
| AT1G25425 | <i>CLE43</i>     | CLAVATA3/ESR-RELATED 43                                                    | -2.6 | 7.7E-05 | 5.6E-04 | -1.4 | 8.8E-02 | 3.8E-01 |
| AT5G61660 | <i>AT5G61660</i> | glycine-rich protein                                                       | -2.6 | 1.2E-05 | 1.2E-04 | -1.5 | 2.3E-02 | 2.0E-01 |
| AT1G54660 | <i>AT1G54660</i> | pseudogene of terpene synthase 21                                          | -2.6 | 6.6E-04 | 3.5E-03 | -1.2 | 4.6E-01 | 7.6E-01 |
| AT4G01410 | <i>AT4G01410</i> | Late embryogenesis abundant (LEA) hydroxyproline-rich glycoprotein family  | -2.6 | 3.8E-09 | 1.2E-07 | -1.3 | 4.9E-02 | 2.9E-01 |
| AT4G12410 | <i>AT4G12410</i> | SAUR-like auxin-responsive protein family                                  | -2.6 | 6.1E-03 | 2.2E-02 | 1.4  | 2.2E-01 | 5.7E-01 |
| AT4G36110 | <i>SAUR9</i>     | SAUR-like auxin-responsive protein family                                  | -2.6 | 2.6E-03 | 1.1E-02 | -1.2 | 3.6E-01 | 7.0E-01 |
| AT5G02200 | <i>FHL</i>       | far-red-elongated hypocotyl1-like protein                                  | -2.6 | 4.1E-05 | 3.3E-04 | -1.5 | 2.6E-02 | 2.1E-01 |
| AT1G15210 | <i>ABCG35</i>    | pleiotropic drug resistance 7                                              | -2.6 | 1.7E-09 | 5.8E-08 | -1.0 | 7.3E-01 | 9.1E-01 |
| AT2G23620 | <i>MES1</i>      | methyl esterase 1                                                          | -2.6 | 1.2E-05 | 1.1E-04 | -1.8 | 2.3E-03 | 6.1E-02 |
| AT1G77131 | <i>AT1G77131</i> | pseudogene of plant glycogenin-like starch initiation protein 2            | -2.6 | 6.5E-03 | 2.3E-02 | -1.2 | 5.4E-01 | 8.1E-01 |
| AT1G80280 | <i>AT1G80280</i> | alpha/beta-Hydrolases superfamily protein                                  | -2.6 | 6.0E-14 | 7.4E-12 | -1.2 | 3.2E-02 | 2.3E-01 |
| AT2G31900 | <i>XIF</i>       | myosin-like protein XIF                                                    | -2.6 | 1.0E-12 | 9.0E-11 | -1.3 | 4.6E-03 | 8.6E-02 |
| AT1G19960 | <i>AT1G19960</i> | transcription factor                                                       | -2.6 | 1.5E-03 | 6.7E-03 | -1.2 | 5.6E-01 | 8.2E-01 |
| AT1G04660 | <i>AT1G04660</i> | glycine-rich protein                                                       | -2.6 | 3.8E-05 | 3.1E-04 | -1.6 | 2.2E-02 | 1.9E-01 |
| AT1G08590 | <i>AT1G08590</i> | Leucine-rich receptor-like protein kinase family protein                   | -2.6 | 3.2E-12 | 2.5E-10 | -1.1 | 2.6E-01 | 6.1E-01 |
| AT1G71692 | <i>AGL12</i>     | AGAMOUS-like 12                                                            | -2.6 | 1.8E-06 | 2.4E-05 | -1.7 | 1.3E-03 | 4.3E-02 |
| AT1G67110 | <i>CYP735A2</i>  | cytochrome P450, family 735, subfamily A, polypeptide 2                    | -2.6 | 2.6E-04 | 1.6E-03 | -1.7 | 2.9E-02 | 2.2E-01 |
| AT5G42500 | <i>AT5G42500</i> | Disease resistance-responsive (dirigent-like protein) family protein       | -2.6 | 8.9E-06 | 9.1E-05 | -1.4 | 8.8E-02 | 3.8E-01 |
| AT4G17490 | <i>ERF6</i>      | ethylene responsive element binding factor 6                               | -2.6 | 2.5E-05 | 2.2E-04 | -1.6 | 1.4E-02 | 1.5E-01 |
| AT3G60390 | <i>HAT3</i>      | homeobox-leucine zipper protein 3                                          | -2.6 | 1.6E-07 | 2.9E-06 | -1.4 | 1.3E-02 | 1.5E-01 |
| AT1G30370 | <i>DLAH</i>      | alpha/beta-Hydrolases superfamily protein                                  | -2.6 | 7.6E-04 | 3.9E-03 | -1.6 | 6.6E-02 | 3.3E-01 |
| AT3G07010 | <i>AT3G07010</i> | Pectin lyase-like superfamily protein                                      | -2.6 | 5.7E-13 | 5.6E-11 | -1.3 | 1.1E-02 | 1.3E-01 |
| AT2G04090 | <i>AT2G04090</i> | MATE efflux family protein                                                 | -2.6 | 1.9E-05 | 1.7E-04 | -1.2 | 3.1E-01 | 6.5E-01 |
| AT3G06460 | <i>AT3G06460</i> | GNS1/SUR4 membrane protein family                                          | -2.6 | 7.3E-03 | 2.5E-02 | 1.1  | 8.4E-01 | 9.5E-01 |
| AT2G16970 | <i>MEE15</i>     | Major facilitator superfamily protein                                      | -2.6 | 1.4E-04 | 9.4E-04 | -1.4 | 8.1E-02 | 3.6E-01 |
| AT4G01390 | <i>AT4G01390</i> | TRAF-like family protein                                                   | -2.6 | 6.1E-03 | 2.2E-02 | -1.5 | 2.5E-01 | 6.0E-01 |
| AT5G60520 | <i>AT5G60520</i> | Late embryogenesis abundant (LEA) protein-like protein                     | -2.6 | 1.3E-02 | 3.9E-02 | -1.3 | 3.6E-01 | 7.0E-01 |
| AT4G15270 | <i>AT4G15270</i> | glucosyltransferase-like protein                                           | -2.6 | 4.7E-03 | 1.8E-02 | -1.6 | 1.2E-01 | 4.5E-01 |
| AT3G54400 | <i>AT3G54400</i> | Eukaryotic aspartyl protease family protein                                | -2.6 | 6.1E-11 | 3.2E-09 | 1.0  | 9.6E-01 | 9.9E-01 |
| AT4G39410 | <i>WRKY13</i>    | WRKY DNA-binding protein 13                                                | -2.6 | 8.8E-04 | 4.4E-03 | -1.2 | 4.4E-01 | 7.5E-01 |
| AT4G11210 | <i>AT4G11210</i> | Disease resistance-responsive (dirigent-like protein) family protein       | -2.6 | 3.2E-06 | 3.9E-05 | -1.6 | 4.6E-03 | 8.7E-02 |
| AT1G31320 | <i>LBD4</i>      | LOB domain-containing protein 4                                            | -2.6 | 5.7E-05 | 4.4E-04 | -1.4 | 6.7E-02 | 3.3E-01 |
| AT1G66450 | <i>AT1G66450</i> | Cysteine/Histidine-rich C1 domain family protein                           | -2.6 | 2.3E-05 | 2.1E-04 | -1.1 | 7.5E-01 | 9.1E-01 |
| AT2G25000 | <i>WRKY60</i>    | WRKY DNA-binding protein 60                                                | -2.6 | 1.1E-05 | 1.1E-04 | -1.2 | 2.9E-01 | 6.3E-01 |
| AT4G13840 | <i>AT4G13840</i> | HXXXD-type acyl-transferase family protein                                 | -2.6 | 1.4E-07 | 2.6E-06 | -1.5 | 8.8E-03 | 1.2E-01 |
| AT5G24070 | <i>AT5G24070</i> | Peroxidase superfamily protein                                             | -2.6 | 4.1E-03 | 1.6E-02 | 1.3  | 3.2E-01 | 6.6E-01 |
| AT1G01110 | <i>IQD18</i>     | IQ-domain 18                                                               | -2.5 | 4.2E-06 | 4.8E-05 | -1.2 | 3.5E-01 | 6.9E-01 |
| AT1G68330 | <i>AT1G68330</i> | membrane-associated kinase regulator                                       | -2.5 | 2.2E-07 | 3.8E-06 | -1.1 | 3.6E-01 | 6.9E-01 |
| AT4G27480 | <i>AT4G27480</i> | Core-2/l-branching beta-1,6-N-acetylglucosaminyltransferase family protein | -2.5 | 9.5E-06 | 9.6E-05 | -1.1 | 4.5E-01 | 7.6E-01 |
| AT3G55840 | <i>AT3G55840</i> | Hs1pro-1 protein                                                           | -2.5 | 2.1E-05 | 1.8E-04 | -1.6 | 9.4E-03 | 1.2E-01 |
| AT1G13280 | <i>AOC4</i>      | allene oxide cyclase 4                                                     | -2.5 | 8.4E-12 | 5.6E-10 | -1.1 | 5.2E-01 | 8.0E-01 |
| AT3G28180 | <i>CSLC04</i>    | Cellulose-synthase-like C4                                                 | -2.5 | 1.6E-10 | 7.4E-09 | -1.3 | 1.5E-02 | 1.6E-01 |
| AT1G13430 | <i>ST4C</i>      | sulfotransferase 4C                                                        | -2.5 | 6.9E-04 | 3.6E-03 | 1.4  | 1.3E-01 | 4.6E-01 |
| AT4G28720 | <i>YUC8</i>      | Flavin-binding monooxygenase family protein                                | -2.5 | 3.6E-04 | 2.1E-03 | -1.5 | 1.0E-01 | 4.0E-01 |
| AT3G50280 | <i>AT3G50280</i> | HXXXD-type acyl-transferase family protein                                 | -2.5 | 1.7E-04 | 1.1E-03 | 1.1  | 6.1E-01 | 8.5E-01 |
| AT4G34800 | <i>AT4G34800</i> | SAUR-like auxin-responsive protein family                                  | -2.5 | 7.8E-06 | 8.1E-05 | -1.3 | 1.2E-01 | 4.5E-01 |
| AT2G23060 | <i>AT2G23060</i> | Acyl-CoA N-acyltransferases (NAT) superfamily protein                      | -2.5 | 1.4E-02 | 4.3E-02 | -1.5 | 2.4E-01 | 5.9E-01 |
| AT4G12550 | <i>AIR1</i>      | Auxin-Induced in Root cultures 1                                           | -2.5 | 5.8E-03 | 2.1E-02 | -2.8 | 2.5E-03 | 6.3E-02 |
| AT5G04970 | <i>AT5G04970</i> | Plant invertase/pectin methylesterase inhibitor superfamily                | -2.5 | 1.3E-03 | 6.1E-03 | -1.0 | 8.6E-01 | 9.6E-01 |
| AT3G54770 | <i>ARP1</i>      | RNA-binding (RRM/RBD/RNP motifs) family protein                            | -2.5 | 6.5E-07 | 9.7E-06 | -1.1 | 5.7E-01 | 8.3E-01 |
| AT5G20550 | <i>AT5G20550</i> | 2-oxoglutarate (2OG) and Fe(II)-dependent oxygenase superfamily protein    | -2.5 | 1.3E-05 | 1.2E-04 | -1.2 | 2.6E-01 | 6.1E-01 |
| AT5G66330 | <i>AT5G66330</i> | Leucine-rich repeat (LRR) family protein                                   | -2.5 | 1.8E-06 | 2.4E-05 | -1.5 | 1.5E-02 | 1.6E-01 |
| AT1G02570 | <i>AT1G02570</i> | transmembrane protein                                                      | -2.5 | 8.6E-04 | 4.3E-03 | -1.2 | 4.6E-01 | 7.6E-01 |
| AT4G29700 | <i>AT4G29700</i> | Alkaline-phosphatase-like family protein                                   | -2.5 | 5.2E-06 | 5.8E-05 | 1.1  | 5.6E-01 | 8.3E-01 |
| AT4G19030 | <i>NLM1</i>      | NOD26-like major intrinsic protein 1                                       | -2.5 | 1.6E-06 | 2.2E-05 | -1.1 | 3.9E-01 | 7.2E-01 |
| AT1G29025 | <i>AT1G29025</i> | Calcium-binding EF-hand family protein                                     | -2.5 | 3.6E-04 | 2.1E-03 | -1.1 | 5.9E-01 | 8.4E-01 |
| AT2G19990 | <i>PR-1-LIKE</i> | pathogenesis-related protein-1-like protein                                | -2.5 | 1.9E-03 | 8.3E-03 | -1.1 | 8.5E-01 | 9.6E-01 |
| AT1G65970 | <i>TPX2</i>      | thioredoxin-dependent peroxidase 2                                         | -2.5 | 2.9E-04 | 1.7E-03 | -1.2 | 4.2E-01 | 7.4E-01 |
| AT2G42870 | <i>PAR1</i>      | phy rapidly regulated 1                                                    | -2.5 | 8.3E-08 | 1.6E-06 | -1.3 | 4.3E-02 | 2.7E-01 |
| AT1G75900 | <i>AT1G75900</i> | GDSL-like Lipase/Acylhydrolase superfamily protein                         | -2.5 | 6.0E-06 | 6.5E-05 | -1.6 | 7.1E-03 | 1.1E-01 |
| AT5G15230 | <i>GASA4</i>     | GAST1 protein homolog 4                                                    | -2.5 | 8.4E-10 | 3.1E-08 | -1.3 | 1.1E-02 | 1.4E-01 |
| AT3G12820 | <i>MYB10</i>     | myb domain protein 10                                                      | -2.5 | 5.5E-03 | 2.0E-02 | -1.5 | 1.3E-01 | 4.5E-01 |
| AT4G36930 | <i>SPT</i>       | basic helix-loop-helix (bHLH) DNA-binding superfamily protein              | -2.5 | 1.0E-09 | 3.7E-08 | -1.2 | 1.0E-01 | 4.0E-01 |
| AT2G35270 | <i>GIK</i>       | Putative AT-hook DNA-binding family protein                                | -2.5 | 1.0E-06 | 1.4E-05 | -1.4 | 3.9E-02 | 2.6E-01 |
| AT5G15160 | <i>BNQ2</i>      | BANQUO 2                                                                   | -2.5 | 1.3E-03 | 6.0E-03 | -1.1 | 5.8E-01 | 8.4E-01 |
| AT1G62610 | <i>AT1G62610</i> | NAD(P)-binding Rossmann-fold superfamily protein                           | -2.5 | 4.1E-08 | 8.8E-07 | -1.7 | 1.7E-04 | 1.2E-02 |
| AT3G63470 | <i>scpl40</i>    | serine carboxypeptidase-like 40                                            | -2.5 | 6.7E-09 | 1.9E-07 | -1.3 | 9.4E-03 | 1.2E-01 |

|           |                  |                                                                                |      |         |         |      |         |         |
|-----------|------------------|--------------------------------------------------------------------------------|------|---------|---------|------|---------|---------|
| AT5G26147 | <i>MIR156F</i>   |                                                                                | -2.5 | 4.3E-03 | 1.6E-02 | -1.4 | 1.9E-01 | 5.3E-01 |
| AT1G35625 | <i>AT1G35625</i> | RING/U-box superfamily protein                                                 | -2.5 | 2.6E-03 | 1.1E-02 | -2.2 | 6.6E-03 | 1.0E-01 |
| AT2G45610 | <i>AT2G45610</i> | alpha/beta-Hydrolases superfamily protein                                      | -2.5 | 3.9E-03 | 1.5E-02 | -2.2 | 1.6E-02 | 1.7E-01 |
| AT5G09970 | <i>CYP78A7</i>   | cytochrome P450, family 78, subfamily A, polypeptide 7                         | -2.5 | 4.1E-03 | 1.6E-02 | -1.1 | 8.3E-01 | 9.5E-01 |
| AT5G42930 | <i>AT5G42930</i> | alpha/beta-Hydrolases superfamily protein                                      | -2.5 | 9.9E-06 | 1.0E-04 | -1.3 | 1.2E-01 | 4.3E-01 |
| AT1G77120 | <i>ADH1</i>      | alcohol dehydrogenase 1                                                        | -2.5 | 4.7E-04 | 2.6E-03 | -1.9 | 7.7E-03 | 1.1E-01 |
| AT3G26610 | <i>AT3G26610</i> | Pectin lyase-like superfamily protein                                          | -2.5 | 2.0E-06 | 2.6E-05 | 1.2  | 1.2E-01 | 4.4E-01 |
| AT2G42060 | <i>AT2G42060</i> | Cysteine/Histidine-rich C1 domain family protein                               | -2.4 | 1.8E-04 | 1.1E-03 | -1.1 | 6.1E-01 | 8.5E-01 |
| AT5G03150 | <i>JKD</i>       | C2H2-like zinc finger protein                                                  | -2.4 | 4.6E-09 | 1.4E-07 | -1.1 | 4.0E-01 | 7.2E-01 |
| AT2G22500 | <i>UCP5</i>      | uncoupling protein 5                                                           | -2.4 | 1.0E-05 | 1.0E-04 | -1.5 | 1.5E-02 | 1.6E-01 |
| AT1G24320 | <i>AT1G24320</i> | Six-hairpin glycosidases superfamily protein                                   | -2.4 | 5.1E-07 | 7.9E-06 | -1.1 | 3.7E-01 | 7.0E-01 |
| AT4G30110 | <i>HMA2</i>      | heavy metal atpase 2                                                           | -2.4 | 3.1E-05 | 2.7E-04 | -1.2 | 4.2E-01 | 7.4E-01 |
| AT4G04745 | <i>AT4G04745</i> | hypothetical protein                                                           | -2.4 | 8.7E-06 | 9.0E-05 | -1.1 | 4.7E-01 | 7.7E-01 |
| AT1G25230 | <i>AT1G25230</i> | Calcineurin-like metallo-phosphoesterase superfamily protein                   | -2.4 | 1.9E-12 | 1.6E-10 | -1.3 | 9.7E-04 | 3.6E-02 |
| AT2G39040 | <i>AT2G39040</i> | Peroxidase superfamily protein                                                 | -2.4 | 3.1E-05 | 2.6E-04 | 1.3  | 2.0E-01 | 5.4E-01 |
| AT1G14390 | <i>AT1G14390</i> | Leucine-rich repeat protein kinase family protein                              | -2.4 | 6.0E-06 | 6.5E-05 | 1.0  | 9.5E-01 | 9.9E-01 |
| AT4G34880 | <i>AT4G34880</i> | Amidase family protein                                                         | -2.4 | 1.4E-05 | 1.3E-04 | -1.2 | 1.6E-01 | 4.9E-01 |
| AT5G39865 | <i>AT5G39865</i> | Glutaredoxin family protein                                                    | -2.4 | 4.4E-07 | 7.0E-06 | -1.5 | 5.1E-03 | 9.1E-02 |
| AT5G23870 | <i>AT5G23870</i> | Pectinacetyltransferase family protein                                         | -2.4 | 2.1E-08 | 5.1E-07 | -1.3 | 3.8E-02 | 2.6E-01 |
| AT3G52561 | <i>AT3G52561</i> | hypothetical protein                                                           | -2.4 | 2.9E-03 | 1.2E-02 | -1.3 | 3.4E-01 | 6.8E-01 |
| AT1G55120 | <i>FRUCT5</i>    | beta-fructofuranosidase 5                                                      | -2.4 | 4.7E-12 | 3.4E-10 | -1.2 | 1.3E-02 | 1.5E-01 |
| AT4G31370 | <i>FLA5</i>      | FASCICLIN-like arabinogalactan protein 5 precursor                             | -2.4 | 7.0E-03 | 2.4E-02 | -1.0 | 9.8E-01 | 1.0E+00 |
| AT5G11540 | <i>GuILO3</i>    | D-arabinono-1,4-lactone oxidase family protein                                 | -2.4 | 4.0E-07 | 6.4E-06 | -1.4 | 2.0E-02 | 1.8E-01 |
| AT5G66640 | <i>DAR3</i>      | DA1-related protein 3                                                          | -2.4 | 1.1E-02 | 3.5E-02 | -2.2 | 8.7E-03 | 1.2E-01 |
| AT3G45095 | <i>AT3G45095</i> | transposable_element_gene                                                      | -2.4 | 1.3E-03 | 6.0E-03 | -1.3 | 3.1E-01 | 6.6E-01 |
| AT2G21200 | <i>AT2G21200</i> | SAUR-like auxin-responsive protein family                                      | -2.4 | 7.8E-04 | 4.0E-03 | -1.2 | 3.2E-01 | 6.6E-01 |
| AT1G75450 | <i>CKX5</i>      | cytokinin oxidase 5                                                            | -2.4 | 6.1E-04 | 3.2E-03 | -1.5 | 7.8E-02 | 3.6E-01 |
| AT4G23130 | <i>CRK5</i>      | cysteine-rich RLK (RECEPTOR-like protein kinase) 5                             | -2.4 | 1.4E-02 | 4.1E-02 | -1.0 | 9.7E-01 | 1.0E+00 |
| AT1G66350 | <i>RGL1</i>      | RGA-like 1                                                                     | -2.4 | 5.2E-08 | 1.1E-06 | -1.2 | 1.1E-01 | 4.2E-01 |
| AT4G37580 | <i>HLS1</i>      | Acyl-CoA N-acyltransferases (NAT) superfamily protein                          | -2.4 | 3.6E-04 | 2.1E-03 | -1.5 | 6.9E-02 | 3.4E-01 |
| AT3G20850 | <i>AT3G20850</i> | proline-rich family protein                                                    | -2.4 | 1.6E-02 | 4.7E-02 | -2.2 | 1.6E-02 | 1.6E-01 |
| AT1G44160 | <i>AT1G44160</i> | HSP40/DnaJ peptide-binding protein                                             | -2.4 | 9.6E-06 | 9.7E-05 | -1.2 | 3.0E-01 | 6.4E-01 |
| AT4G11280 | <i>ACS6</i>      | 1-aminocyclopropane-1-carboxylic acid (acc) synthase 6                         | -2.4 | 5.6E-04 | 3.0E-03 | -1.9 | 6.5E-03 | 1.0E-01 |
| AT5G54370 | <i>AT5G54370</i> | Late embryogenesis abundant (LEA) protein-like protein                         | -2.4 | 4.0E-03 | 1.5E-02 | -1.2 | 5.2E-01 | 8.0E-01 |
| AT3G21755 | <i>AT3G21755</i> | Natural antisense transcript overlaps with AT3G21760                           | -2.4 | 6.2E-05 | 4.7E-04 | -1.2 | 3.8E-01 | 7.1E-01 |
| AT4G13860 | <i>AT4G13860</i> | RNA-binding (RRM/RBD/RNP motifs) family protein                                | -2.4 | 5.7E-05 | 4.4E-04 | -1.9 | 9.3E-04 | 3.5E-02 |
| AT3G25905 | <i>CLE27</i>     | CLAVATA3/ESR-RELATED 27                                                        | -2.4 | 2.1E-03 | 9.0E-03 | 1.2  | 3.2E-01 | 6.6E-01 |
| AT5G63600 | <i>FLS5</i>      | flavonol synthase 5                                                            | -2.4 | 9.8E-06 | 9.8E-05 | -1.0 | 7.8E-01 | 9.3E-01 |
| AT3G24715 | <i>AT3G24715</i> | kinase superfamily with octicosapeptide/Phox/Bem1p domain-containing protein   | -2.4 | 2.3E-10 | 1.1E-08 | -1.6 | 4.0E-05 | 4.5E-03 |
| AT4G12050 | <i>AT4G12050</i> | Putative AT-hook DNA-binding family protein                                    | -2.4 | 6.6E-06 | 7.1E-05 | -1.1 | 6.6E-01 | 8.7E-01 |
| AT3G04181 | <i>AT3G04181</i> | hypothetical protein                                                           | -2.4 | 1.6E-02 | 4.8E-02 | -1.0 | 1.0E+00 | 1.0E+00 |
| AT5G14920 | <i>AT5G14920</i> | Gibberellin-regulated family protein                                           | -2.4 | 2.6E-05 | 2.2E-04 | 1.1  | 7.2E-01 | 9.0E-01 |
| AT4G31910 | <i>BAT1</i>      | HXXXD-type acyl-transferase family protein                                     | -2.4 | 3.0E-12 | 2.3E-10 | 1.0  | 9.7E-01 | 9.9E-01 |
| AT1G12110 | <i>NRT1.1</i>    | nitrate transporter 1.1                                                        | -2.4 | 1.5E-10 | 7.0E-09 | -1.1 | 2.3E-01 | 5.8E-01 |
| AT5G24580 | <i>AT5G24580</i> | Heavy metal transport/detoxification superfamily protein                       | -2.4 | 1.6E-03 | 7.3E-03 | -1.8 | 1.9E-02 | 1.8E-01 |
| AT2G38750 | <i>ANNAT4</i>    | annexin 4                                                                      | -2.4 | 4.4E-06 | 5.0E-05 | -1.2 | 1.7E-01 | 5.1E-01 |
| AT3G59850 | <i>AT3G59850</i> | Pectin lyase-like superfamily protein                                          | -2.4 | 4.9E-03 | 1.8E-02 | 1.4  | 2.3E-01 | 5.8E-01 |
| AT5G41900 | <i>AT5G41900</i> | alpha/beta-Hydrolases superfamily protein                                      | -2.4 | 4.5E-05 | 3.6E-04 | -1.6 | 8.0E-03 | 1.1E-01 |
| AT5G39190 | <i>GER2</i>      | germin-like protein 2                                                          | -2.4 | 7.6E-03 | 2.6E-02 | -2.3 | 9.6E-03 | 1.3E-01 |
| AT5G49560 | <i>AT5G49560</i> | Putative methyltransferase family protein                                      | -2.4 | 4.0E-04 | 2.3E-03 | -1.1 | 6.0E-01 | 8.5E-01 |
| AT1G15580 | <i>IAA5</i>      | indole-3-acetic acid inducible 5                                               | -2.3 | 1.2E-02 | 3.8E-02 | -1.7 | 6.5E-02 | 3.3E-01 |
| AT3G49580 | <i>LSU1</i>      | response to low sulfur 1                                                       | -2.3 | 1.9E-03 | 8.2E-03 | 1.0  | 8.5E-01 | 9.6E-01 |
| AT5G15830 | <i>bZIP3</i>     | basic leucine-zipper 3                                                         | -2.3 | 4.1E-07 | 6.5E-06 | -1.5 | 4.7E-03 | 8.8E-02 |
| AT5G22310 | <i>AT5G22310</i> | trichohyalin-like protein                                                      | -2.3 | 9.4E-07 | 1.3E-05 | 1.0  | 9.6E-01 | 9.9E-01 |
| AT3G26830 | <i>PAD3</i>      | Cytochrome P450 superfamily protein                                            | -2.3 | 6.5E-03 | 2.3E-02 | 2.1  | 8.1E-03 | 1.2E-01 |
| AT1G20620 | <i>CAT3</i>      | catalase 3                                                                     | -2.3 | 1.4E-07 | 2.6E-06 | -1.2 | 1.7E-01 | 5.2E-01 |
| AT5G15120 | <i>AT5G15120</i> | 2-aminoethanethiol dioxygenase, putative (DUF1637)                             | -2.3 | 7.3E-03 | 2.5E-02 | -1.4 | 2.4E-01 | 6.0E-01 |
| AT3G50740 | <i>UGT72E1</i>   | UDP-glucosyl transferase 72E1                                                  | -2.3 | 1.4E-09 | 4.9E-08 | -1.1 | 3.9E-01 | 7.1E-01 |
| AT4G29780 | <i>AT4G29780</i> | nuclease                                                                       | -2.3 | 1.9E-03 | 8.3E-03 | -1.8 | 2.1E-02 | 1.9E-01 |
| AT5G46050 | <i>PTR3</i>      | peptide transporter 3                                                          | -2.3 | 9.5E-05 | 6.8E-04 | -1.1 | 5.6E-01 | 8.2E-01 |
| AT5G56320 | <i>EXPA14</i>    | expansin A14                                                                   | -2.3 | 4.1E-06 | 4.7E-05 | -1.4 | 2.0E-02 | 1.8E-01 |
| AT1G22500 | <i>ATL15</i>     | RING/U-box superfamily protein                                                 | -2.3 | 1.1E-05 | 1.1E-04 | -1.4 | 4.7E-02 | 2.8E-01 |
| AT3G08030 | <i>AT3G08030</i> | DNA-directed RNA polymerase subunit beta (Protein of unknown function, DUF642) | -2.3 | 1.6E-10 | 7.4E-09 | -1.2 | 2.2E-02 | 2.0E-01 |
| AT4G37390 | <i>BRU6</i>      | Auxin-responsive GH3 family protein                                            | -2.3 | 1.1E-06 | 1.5E-05 | 1.3  | 1.0E-01 | 4.1E-01 |
| AT4G18510 | <i>CLE2</i>      | CLAVATA3/ESR-related 2                                                         | -2.3 | 1.7E-04 | 1.1E-03 | -1.2 | 3.5E-01 | 6.9E-01 |
| AT2G17060 | <i>AT2G17060</i> | Disease resistance protein (TIR-NBS-LRR class) family                          | -2.3 | 3.4E-04 | 2.0E-03 | 1.0  | 9.5E-01 | 9.9E-01 |
| AT2G05180 | <i>CYP705A6</i>  | cytochrome P450, family 705, subfamily A, polypeptide 6                        | -2.3 | 1.3E-04 | 9.0E-04 | -1.1 | 4.7E-01 | 7.7E-01 |
| AT5G06740 | <i>AT5G06740</i> | Concanavalin A-like lectin protein kinase family protein                       | -2.3 | 2.4E-05 | 2.1E-04 | -1.3 | 9.2E-02 | 3.9E-01 |

|           |                  |                                                                               |      |         |         |      |         |         |
|-----------|------------------|-------------------------------------------------------------------------------|------|---------|---------|------|---------|---------|
| AT5G47990 | <i>CYP705A5</i>  | cytochrome P450, family 705, subfamily A, polypeptide 5                       | -2.3 | 8.6E-05 | 6.2E-04 | -1.6 | 1.8E-02 | 1.8E-01 |
| AT3G25290 | <i>AT3G25290</i> | Auxin-responsive family protein                                               | -2.3 | 2.5E-10 | 1.1E-08 | -1.0 | 6.7E-01 | 8.8E-01 |
| AT4G13310 | <i>CYP71A20</i>  | cytochrome P450, family 71, subfamily A, polypeptide 20                       | -2.3 | 1.2E-05 | 1.2E-04 | -1.4 | 6.3E-02 | 3.2E-01 |
| AT4G21490 | <i>NDB3</i>      | NAD(P)H dehydrogenase B3                                                      | -2.3 | 5.6E-03 | 2.0E-02 | 1.5  | 1.4E-01 | 4.7E-01 |
| AT5G63810 | <i>BGAL10</i>    | beta-galactosidase 10                                                         | -2.3 | 5.1E-09 | 1.5E-07 | -1.4 | 1.3E-03 | 4.3E-02 |
| AT2G25410 | <i>AT2G25410</i> | RING/U-box superfamily protein                                                | -2.3 | 1.6E-02 | 4.6E-02 | -1.5 | 2.5E-01 | 6.0E-01 |
| AT1G52190 | <i>AT1G52190</i> | Major facilitator superfamily protein                                         | -2.3 | 8.9E-09 | 2.4E-07 | -1.4 | 7.1E-03 | 1.1E-01 |
| AT1G14960 | <i>AT1G14960</i> | Polyketide cyclase/dehydrase and lipid transport superfamily protein          | -2.3 | 1.1E-03 | 5.4E-03 | -1.4 | 1.5E-01 | 4.8E-01 |
| AT1G11735 | <i>MIR171B</i>   |                                                                               | -2.3 | 8.4E-04 | 4.2E-03 | -1.9 | 3.8E-03 | 7.7E-02 |
| AT1G78865 | <i>AT1G78865</i> |                                                                               | -2.3 | 1.6E-02 | 4.7E-02 | 1.1  | 7.3E-01 | 9.1E-01 |
| AT1G11000 | <i>MLO4</i>      | Seven transmembrane MLO family protein                                        | -2.3 | 6.9E-10 | 2.6E-08 | -1.2 | 4.0E-02 | 2.6E-01 |
| AT1G18075 | <i>MIR159B</i>   |                                                                               | -2.3 | 1.3E-02 | 4.1E-02 | -2.1 | 9.6E-03 | 1.3E-01 |
| AT1G30250 | <i>AT1G30250</i> | hypothetical protein                                                          | -2.3 | 1.3E-02 | 4.0E-02 | -1.2 | 5.5E-01 | 8.2E-01 |
| AT2G27010 | <i>CYP705A9</i>  | cytochrome P450, family 705, subfamily A, polypeptide 9                       | -2.3 | 5.3E-08 | 1.1E-06 | 1.2  | 2.1E-01 | 5.5E-01 |
| AT3G25790 | <i>AT3G25790</i> | myb-like transcription factor family protein                                  | -2.3 | 2.6E-08 | 6.0E-07 | -1.3 | 2.6E-02 | 2.1E-01 |
| AT5G62280 | <i>AT5G62280</i> | DUF1442 family protein (DUF1442)                                              | -2.3 | 2.0E-04 | 1.2E-03 | -1.1 | 7.2E-01 | 9.0E-01 |
| AT5G44460 | <i>CML43</i>     | calmodulin like 43                                                            | -2.3 | 1.3E-05 | 1.3E-04 | -1.3 | 1.2E-01 | 4.4E-01 |
| AT1G11655 | <i>AT1G11655</i> | hypothetical protein                                                          | -2.3 | 1.5E-03 | 6.7E-03 | -1.3 | 2.0E-01 | 5.4E-01 |
| AT4G18970 | <i>AT4G18970</i> | GDSL-like Lipase/Acylhydrolase superfamily protein                            | -2.3 | 2.7E-06 | 3.3E-05 | -1.8 | 4.7E-04 | 2.3E-02 |
| AT5G54530 | <i>AT5G54530</i> | serine protease, putative (Protein of unknown function, DUF538)               | -2.3 | 1.4E-05 | 1.3E-04 | -1.1 | 3.9E-01 | 7.2E-01 |
| AT5G44920 | <i>AT5G44920</i> | Toll-Interleukin-Resistance (TIR) domain family protein                       | -2.3 | 3.5E-07 | 5.7E-06 | -1.1 | 6.6E-01 | 8.8E-01 |
| AT5G04190 | <i>PKS4</i>      | phytochrome kinase substrate 4                                                | -2.3 | 2.3E-05 | 2.0E-04 | -1.1 | 5.1E-01 | 8.0E-01 |
| AT3G43270 | <i>AT3G43270</i> | Plant invertase/pectin methylesterase inhibitor superfamily                   | -2.3 | 2.8E-06 | 3.4E-05 | -1.4 | 2.5E-02 | 2.0E-01 |
| AT4G37220 | <i>AT4G37220</i> | Cold acclimation protein WCOR413 family                                       | -2.3 | 8.1E-04 | 4.1E-03 | -1.9 | 5.7E-03 | 9.7E-02 |
| AT5G23830 | <i>AT5G23830</i> | MD-2-related lipid recognition domain-containing protein                      | -2.3 | 4.2E-04 | 2.4E-03 | -1.6 | 3.3E-02 | 2.4E-01 |
| AT1G79310 | <i>MC7</i>       | metacaspase 7                                                                 | -2.3 | 9.7E-07 | 1.4E-05 | -1.2 | 1.3E-01 | 4.5E-01 |
| AT1G52070 | <i>AT1G52070</i> | Mannose-binding lectin superfamily protein                                    | -2.3 | 5.8E-03 | 2.1E-02 | -1.4 | 2.7E-01 | 6.2E-01 |
| AT3G58190 | <i>LBD29</i>     | lateral organ boundaries-domain 29                                            | -2.3 | 2.3E-03 | 9.7E-03 | -1.6 | 4.9E-02 | 2.9E-01 |
| AT3G49190 | <i>AT3G49190</i> | O-acyltransferase (WSD1-like) family protein                                  | -2.3 | 6.0E-03 | 2.2E-02 | -1.2 | 5.9E-01 | 8.4E-01 |
| AT5G47370 | <i>HAT2</i>      | Homeobox-leucine zipper protein 4 (HB-4) / HD-ZIP protein                     | -2.3 | 5.5E-05 | 4.3E-04 | -1.2 | 2.2E-01 | 5.7E-01 |
| AT2G46150 | <i>AT2G46150</i> | Late embryogenesis abundant (LEA) hydroxyproline-rich glycoprotein family     | -2.3 | 1.1E-04 | 7.7E-04 | -1.7 | 4.5E-03 | 8.6E-02 |
| AT2G30370 | <i>CHAL</i>      | allergen-like protein                                                         | -2.3 | 7.5E-04 | 3.8E-03 | -1.0 | 8.4E-01 | 9.5E-01 |
| AT4G25750 | <i>ABCG4</i>     | ABC-2 type transporter family protein                                         | -2.3 | 3.8E-04 | 2.2E-03 | -1.7 | 9.9E-03 | 1.3E-01 |
| AT5G15130 | <i>WRKY72</i>    | WRKY DNA-binding protein 72                                                   | -2.3 | 6.8E-07 | 1.0E-05 | -1.1 | 2.9E-01 | 6.4E-01 |
| AT1G73330 | <i>DR4</i>       | drought-repressed 4                                                           | -2.2 | 4.3E-03 | 1.6E-02 | -1.8 | 3.1E-02 | 2.3E-01 |
| AT2G46660 | <i>CYP78A6</i>   | cytochrome P450, family 78, subfamily A, polypeptide 6                        | -2.2 | 9.1E-06 | 9.3E-05 | -1.4 | 4.5E-02 | 2.8E-01 |
| AT4G30410 | <i>AT4G30410</i> | sequence-specific DNA binding transcription factor                            | -2.2 | 1.4E-07 | 2.6E-06 | -1.7 | 5.9E-05 | 5.7E-03 |
| AT1G15125 | <i>AT1G15125</i> | S-adenosyl-L-methionine-dependent methyltransferases superfamily protein      | -2.2 | 1.6E-04 | 1.1E-03 | -1.2 | 4.2E-01 | 7.4E-01 |
| AT2G02610 | <i>AT2G02610</i> | Cysteine/Histidine-rich C1 domain family protein                              | -2.2 | 1.3E-04 | 8.6E-04 | -1.8 | 2.7E-03 | 6.5E-02 |
| AT1G62480 | <i>AT1G62480</i> | Vacuolar calcium-binding protein-like protein                                 | -2.2 | 6.9E-07 | 1.0E-05 | -1.9 | 2.1E-05 | 2.8E-03 |
| AT2G38760 | <i>ANNAT3</i>    | annexin 3                                                                     | -2.2 | 7.6E-07 | 1.1E-05 | -1.3 | 6.1E-02 | 3.2E-01 |
| AT1G19610 | <i>PDF1.4</i>    | defensin-like protein                                                         | -2.2 | 1.6E-03 | 7.3E-03 | -1.6 | 3.8E-02 | 2.5E-01 |
| AT3G43960 | <i>AT3G43960</i> | Cysteine proteinases superfamily protein                                      | -2.2 | 3.8E-09 | 1.2E-07 | -1.0 | 8.5E-01 | 9.5E-01 |
| AT1G01070 | <i>UMAMIT28</i>  | nodulin MtN21 /EamA-like transporter family protein                           | -2.2 | 1.2E-04 | 8.1E-04 | -1.0 | 9.9E-01 | 1.0E+00 |
| AT5G54050 | <i>AT5G54050</i> | Cysteine/Histidine-rich C1 domain family protein                              | -2.2 | 1.3E-02 | 4.1E-02 | -1.1 | 6.5E-01 | 8.7E-01 |
| AT1G60095 | <i>AT1G60095</i> | Mannose-binding lectin superfamily protein                                    | -2.2 | 7.0E-05 | 5.2E-04 | 1.0  | 8.9E-01 | 9.7E-01 |
| AT5G26660 | <i>MYB86</i>     | myb domain protein 86                                                         | -2.2 | 1.1E-04 | 7.8E-04 | -1.2 | 3.6E-01 | 7.0E-01 |
| AT5G57480 | <i>AT5G57480</i> | P-loop containing nucleoside triphosphate hydrolases superfamily protein      | -2.2 | 1.1E-10 | 5.6E-09 | -1.1 | 3.2E-01 | 6.7E-01 |
| AT1G74080 | <i>MYB122</i>    | myb domain protein 122                                                        | -2.2 | 7.3E-05 | 5.4E-04 | 1.0  | 8.9E-01 | 9.7E-01 |
| AT5G22460 | <i>AT5G22460</i> | alpha/beta-Hydrolases superfamily protein                                     | -2.2 | 1.4E-05 | 1.3E-04 | 1.2  | 2.3E-01 | 5.8E-01 |
| AT1G77200 | <i>AT1G77200</i> | Integrase-type DNA-binding superfamily protein                                | -2.2 | 8.6E-05 | 6.2E-04 | -1.1 | 7.5E-01 | 9.1E-01 |
| AT4G34770 | <i>AT4G34770</i> | SAUR-like auxin-responsive protein family                                     | -2.2 | 7.9E-04 | 4.0E-03 | -1.3 | 1.6E-01 | 5.0E-01 |
| AT3G50800 | <i>AT3G50800</i> | hypothetical protein                                                          | -2.2 | 3.2E-03 | 1.3E-02 | -1.2 | 5.5E-01 | 8.2E-01 |
| AT4G16670 | <i>AT4G16670</i> | auxin canalization protein (DUF828)                                           | -2.2 | 6.3E-05 | 4.8E-04 | 1.3  | 1.1E-01 | 4.2E-01 |
| AT3G27510 | <i>AT3G27510</i> | Cysteine/Histidine-rich C1 domain family protein                              | -2.2 | 1.7E-05 | 1.6E-04 | -1.1 | 4.6E-01 | 7.6E-01 |
| AT5G59080 | <i>AT5G59080</i> | hypothetical protein                                                          | -2.2 | 2.4E-06 | 3.0E-05 | -1.2 | 2.2E-01 | 5.7E-01 |
| AT3G21680 | <i>AT3G21680</i> | hypothetical protein                                                          | -2.2 | 9.6E-05 | 6.9E-04 | -1.4 | 5.8E-02 | 3.1E-01 |
| AT1G52050 | <i>AT1G52050</i> | Mannose-binding lectin superfamily protein                                    | -2.2 | 1.3E-02 | 3.9E-02 | -1.2 | 5.7E-01 | 8.3E-01 |
| AT5G52220 | <i>AT5G52220</i> | chromosome transmission fidelity-like protein                                 | -2.2 | 1.7E-02 | 5.0E-02 | 1.0  | 8.8E-01 | 9.7E-01 |
| AT1G79580 | <i>SMB</i>       | NAC (No Apical Meristem) domain transcriptional regulator superfamily protein | -2.2 | 9.0E-03 | 3.0E-02 | -1.0 | 9.3E-01 | 9.8E-01 |
| AT3G02850 | <i>SKOR</i>      | STELAR K outward rectifier                                                    | -2.2 | 6.2E-05 | 4.7E-04 | 1.2  | 2.9E-01 | 6.4E-01 |
| AT3G03500 | <i>AT3G03500</i> | TatD related DNase                                                            | -2.2 | 2.7E-03 | 1.1E-02 | -1.3 | 2.6E-01 | 6.1E-01 |
| AT3G07600 | <i>AT3G07600</i> | Heavy metal transport/detoxification superfamily protein                      | -2.2 | 7.3E-04 | 3.8E-03 | -1.0 | 8.6E-01 | 9.6E-01 |
| AT3G59010 | <i>PME61</i>     | pectin methylesterase 61                                                      | -2.2 | 2.5E-03 | 1.1E-02 | -1.5 | 8.2E-02 | 3.6E-01 |
| AT1G20160 | <i>AT5BT5.2</i>  | Subtilisin-like serine endopeptidase family protein                           | -2.2 | 7.8E-07 | 1.1E-05 | 1.2  | 2.6E-01 | 6.1E-01 |
| AT5G39890 | <i>AT5G39890</i> | 2-aminoethanethiol dioxygenase, putative (DUF1637)                            | -2.2 | 2.0E-05 | 1.8E-04 | -1.6 | 4.3E-03 | 8.3E-02 |

|           |           |                                                                         |      |         |         |      |         |         |
|-----------|-----------|-------------------------------------------------------------------------|------|---------|---------|------|---------|---------|
| AT5G28300 | AT5G28300 | Duplicated homeodomain-like superfamily protein                         | -2.2 | 2.3E-07 | 3.9E-06 | -1.2 | 1.4E-01 | 4.7E-01 |
| AT3G03830 | SAUR28    | SAUR-like auxin-responsive protein family                               | -2.2 | 2.4E-03 | 1.0E-02 | -1.8 | 1.5E-02 | 1.6E-01 |
| AT2G29130 | LAC2      | laccase 2                                                               | -2.2 | 1.0E-03 | 5.0E-03 | -1.5 | 7.3E-02 | 3.5E-01 |
| AT5G63540 | RMI1      | recQ-mediated instability protein (DUF1767)                             | -2.2 | 2.9E-03 | 1.2E-02 | 1.3  | 2.7E-01 | 6.2E-01 |
| AT5G52050 | AT5G52050 | MATE efflux family protein                                              | -2.2 | 5.5E-03 | 2.0E-02 | 1.2  | 4.7E-01 | 7.7E-01 |
| AT5G47950 | AT5G47950 | HXXXD-type acyl-transferase family protein                              | -2.2 | 1.7E-06 | 2.2E-05 | -1.6 | 1.5E-03 | 4.6E-02 |
| AT1G56630 | AT1G56630 | alpha/beta-Hydrolases superfamily protein                               | -2.2 | 1.7E-04 | 1.1E-03 | 1.1  | 6.7E-01 | 8.8E-01 |
| AT4G30140 | CDEF1     | GDSL-like Lipase/Acylhydrolase superfamily protein                      | -2.2 | 4.2E-03 | 1.6E-02 | -1.2 | 5.2E-01 | 8.0E-01 |
| AT5G40030 | AT5G40030 | Protein kinase superfamily protein                                      | -2.2 | 3.2E-03 | 1.3E-02 | 1.1  | 6.4E-01 | 8.6E-01 |
| AT4G27260 | WES1      | Auxin-responsive GH3 family protein                                     | -2.2 | 3.1E-06 | 3.8E-05 | 1.0  | 7.2E-01 | 9.0E-01 |
| AT1G11740 | AT1G11740 | ankyrin repeat family protein                                           | -2.2 | 7.1E-08 | 1.4E-06 | -1.5 | 5.2E-04 | 2.4E-02 |
| AT5G44260 | AT5G44260 | Zinc finger C-x8-C-x5-C-x3-H type family protein                        | -2.2 | 5.0E-04 | 2.8E-03 | -1.0 | 9.6E-01 | 9.9E-01 |
| AT4G31380 | FLP1      | flowering-promoting factor-like protein                                 | -2.2 | 1.5E-02 | 4.4E-02 | -1.9 | 3.7E-02 | 2.5E-01 |
| AT2G30930 | AT2G30930 | hypothetical protein                                                    | -2.2 | 8.2E-07 | 1.2E-05 | -1.7 | 3.7E-04 | 2.0E-02 |
| AT1G66270 | BGLU21    | Glycosyl hydrolase superfamily protein                                  | -2.2 | 5.9E-03 | 2.1E-02 | 1.2  | 4.9E-01 | 7.8E-01 |
| AT4G38340 | AT4G38340 | Plant regulator RWP-RK family protein                                   | -2.2 | 7.7E-05 | 5.6E-04 | 1.3  | 1.5E-01 | 4.8E-01 |
| AT5G47590 | AT5G47590 | Heat shock protein HSP20/alpha crystallin family                        | -2.2 | 1.9E-04 | 1.2E-03 | -1.5 | 4.3E-02 | 2.7E-01 |
| AT2G38940 | PHT1      |                                                                         | -2.2 | 4.6E-06 | 5.3E-05 | 1.2  | 1.6E-01 | 5.0E-01 |
| AT3G23800 | SBP3      | selenium-binding protein 3                                              | -2.2 | 2.7E-05 | 2.3E-04 | -1.1 | 4.1E-01 | 7.3E-01 |
| AT1G31040 | AT1G31040 | PLATZ transcription factor family protein                               | -2.2 | 6.2E-04 | 3.3E-03 | -1.6 | 1.7E-02 | 1.7E-01 |
| AT5G60310 | AT5G60310 | Concanavalin A-like lectin protein kinase family protein                | -2.2 | 6.7E-04 | 3.5E-03 | -1.2 | 3.0E-01 | 6.5E-01 |
| AT4G39675 | AT4G39675 | hypothetical protein                                                    | -2.2 | 7.2E-04 | 3.7E-03 | -1.6 | 2.4E-02 | 2.0E-01 |
| AT1G19530 | AT1G19530 | DNA polymerase epsilon catalytic subunit A                              | -2.2 | 1.3E-02 | 4.1E-02 | -1.1 | 7.2E-01 | 9.0E-01 |
| AT5G02360 | AT5G02360 | DC1 domain-containing protein                                           | -2.2 | 5.5E-06 | 6.1E-05 | -1.2 | 2.1E-01 | 5.6E-01 |
| AT3G45650 | NAXT1     | nitrate excretion transporter1                                          | -2.2 | 3.6E-07 | 5.8E-06 | -1.4 | 1.3E-02 | 1.5E-01 |
| AT3G03470 | CYP89A9   | cytochrome P450, family 87, subfamily A, polypeptide 9                  | -2.2 | 1.1E-07 | 2.0E-06 | -1.3 | 1.6E-02 | 1.7E-01 |
| AT1G52060 | AT1G52060 | Mannose-binding lectin superfamily protein                              | -2.2 | 1.7E-02 | 4.9E-02 | -1.1 | 8.4E-01 | 9.5E-01 |
| AT5G14020 | AT5G14020 | Endosomal targeting BRO1-like domain-containing protein                 | -2.2 | 4.5E-03 | 1.7E-02 | -1.1 | 7.9E-01 | 9.3E-01 |
| AT5G53190 | SWEET3    | Nodulin MtN3 family protein                                             | -2.2 | 8.5E-04 | 4.3E-03 | -1.3 | 1.4E-01 | 4.7E-01 |
| AT4G17220 | MAP70-5   | microtubule-associated proteins 70-5                                    | -2.2 | 1.3E-06 | 1.7E-05 | -1.3 | 6.7E-02 | 3.3E-01 |
| AT3G48790 | AT3G48790 | Pyridoxal phosphate (PLP)-dependent transferases superfamily protein    | -2.2 | 1.8E-04 | 1.2E-03 | -1.5 | 2.0E-02 | 1.8E-01 |
| AT3G48260 | WNK3      | with no lysine (K) kinase 3                                             | -2.2 | 7.5E-07 | 1.1E-05 | -1.2 | 2.1E-01 | 5.5E-01 |
| AT3G20470 | GRP5      | glycine-rich protein 5                                                  | -2.2 | 1.5E-03 | 6.9E-03 | -1.3 | 2.6E-01 | 6.1E-01 |
| AT3G14260 | AT3G14260 | LURP-one-like protein (DUF567)                                          | -2.2 | 2.3E-04 | 1.4E-03 | -1.1 | 5.1E-01 | 8.0E-01 |
| AT1G26200 | AT1G26200 | TRAM, LAG1 and CLN8 (TLC) lipid-sensing domain containing protein       | -2.2 | 1.4E-02 | 4.3E-02 | -1.2 | 4.6E-01 | 7.6E-01 |
| AT5G18860 | NSH3      | inosine-uridine preferring nucleoside hydrolase family protein          | -2.2 | 1.3E-10 | 6.1E-09 | -1.3 | 9.2E-03 | 1.2E-01 |
| AT5G19040 | IPT5      | isopenentenyltransferase 5                                              | -2.2 | 1.2E-04 | 8.0E-04 | -1.5 | 2.6E-02 | 2.1E-01 |
| AT5G06940 | AT5G06940 | Leucine-rich repeat receptor-like protein kinase family protein         | -2.2 | 1.3E-02 | 4.0E-02 | 1.4  | 1.8E-01 | 5.2E-01 |
| AT2G15370 | FUT5      | fucosyltransferase 5                                                    | -2.1 | 4.7E-03 | 1.7E-02 | -1.4 | 1.2E-01 | 4.4E-01 |
| AT4G13560 | UNE15     | Late embryogenesis abundant protein (LEA) family protein                | -2.1 | 1.1E-02 | 3.4E-02 | 1.3  | 4.1E-01 | 7.3E-01 |
| AT1G73066 | AT1G73066 | Leucine-rich repeat family protein                                      | -2.1 | 3.8E-06 | 4.4E-05 | -1.2 | 1.2E-01 | 4.4E-01 |
| AT3G07000 | AT3G07000 | Cysteine/Histidine-rich C1 domain family protein                        | -2.1 | 5.5E-06 | 6.1E-05 | -1.5 | 3.3E-03 | 7.2E-02 |
| AT2G44740 | CYCP4     |                                                                         | -2.1 | 7.1E-05 | 5.3E-04 | -1.3 | 7.2E-02 | 3.4E-01 |
| AT3G07990 | SCPL27    | serine carboxypeptidase-like 27                                         | -2.1 | 8.1E-12 | 5.4E-10 | -1.2 | 5.0E-02 | 2.9E-01 |
| AT4G14980 | AT4G14980 | Cysteine/Histidine-rich C1 domain family protein                        | -2.1 | 4.7E-03 | 1.7E-02 | -1.4 | 1.3E-01 | 4.5E-01 |
| AT1G66040 | VIM4      | Zinc finger (C3HC4-type RING finger) family protein                     | -2.1 | 8.8E-03 | 2.9E-02 | -1.3 | 3.5E-01 | 6.9E-01 |
| AT5G41260 | BSK8      | kinase with tetratricopeptide repeat domain-containing protein          | -2.1 | 6.1E-12 | 4.3E-10 | -1.5 | 1.2E-05 | 1.9E-03 |
| AT4G27450 | AT4G27450 | aluminum induced protein with YGL and LRDR motifs                       | -2.1 | 3.1E-08 | 7.1E-07 | -1.6 | 7.1E-05 | 6.6E-03 |
| AT4G13918 | AT4G13918 | Natural antisense transcript overlaps with AT4G13920                    | -2.1 | 5.7E-06 | 6.3E-05 | -1.3 | 8.4E-02 | 3.7E-01 |
| AT2G43000 | NAC042    | NAC domain containing protein 42                                        | -2.1 | 1.5E-02 | 4.6E-02 | 1.6  | 5.2E-02 | 3.0E-01 |
| AT3G25780 | AOC3      | allene oxide cyclase 3                                                  | -2.1 | 4.5E-06 | 5.1E-05 | -1.2 | 2.2E-01 | 5.6E-01 |
| AT3G14210 | ESM1      | GDSL-like lipase/acylhydrolase superfamily protein                      | -2.1 | 1.7E-03 | 7.5E-03 | -1.0 | 8.8E-01 | 9.7E-01 |
| AT1G07090 | LSH6      | LIGHT-DEPENDENT SHORT HYPOCOTYLS-like protein (DUF640)                  | -2.1 | 7.8E-05 | 5.7E-04 | -1.0 | 7.9E-01 | 9.3E-01 |
| AT1G17250 | RLP3      | receptor like protein 3                                                 | -2.1 | 8.3E-03 | 2.8E-02 | 1.3  | 2.8E-01 | 6.3E-01 |
| AT2G13910 | AT2G13910 | pseudogene of Cysteine/Histidine-rich C1 domain family protein          | -2.1 | 2.6E-04 | 1.6E-03 | -1.3 | 1.9E-01 | 5.4E-01 |
| AT4G22235 | AT4G22235 | defensin-like protein                                                   | -2.1 | 3.7E-03 | 1.5E-02 | -1.1 | 5.7E-01 | 8.3E-01 |
| AT5G40730 | AGP24     | arabinogalactan protein 24                                              | -2.1 | 2.2E-05 | 1.9E-04 | -1.7 | 9.0E-04 | 3.5E-02 |
| AT4G17470 | AT4G17470 | alpha/beta-Hydrolases superfamily protein                               | -2.1 | 2.6E-03 | 1.1E-02 | -1.2 | 5.0E-01 | 7.9E-01 |
| AT3G17580 | AT3G17580 | SsrA-binding protein                                                    | -2.1 | 4.0E-05 | 3.3E-04 | -1.3 | 6.4E-02 | 3.2E-01 |
| AT4G14270 | AT4G14270 | polyadenylate-binding protein interacting protein                       | -2.1 | 2.3E-09 | 7.5E-08 | -1.1 | 5.9E-01 | 8.4E-01 |
| AT4G25220 | G3Pp2     | root hair specific 15                                                   | -2.1 | 1.5E-04 | 9.9E-04 | -1.3 | 1.9E-01 | 5.3E-01 |
| AT5G60100 | PRR3      | pseudo-response regulator 3                                             | -2.1 | 3.7E-08 | 8.2E-07 | -1.2 | 1.1E-01 | 4.2E-01 |
| AT5G58660 | AT5G58660 | 2-oxoglutarate (2OG) and Fe(II)-dependent oxygenase superfamily protein | -2.1 | 5.8E-05 | 4.5E-04 | -1.1 | 6.8E-01 | 8.8E-01 |
| AT3G20935 | CYP705A28 | cytochrome P450, family 705, subfamily A, polypeptide 28                | -2.1 | 1.5E-04 | 1.0E-03 | -1.2 | 1.9E-01 | 5.3E-01 |
| AT2G26360 | AT2G26360 | Mitochondrial substrate carrier family protein                          | -2.1 | 3.0E-06 | 3.6E-05 | -1.4 | 9.7E-03 | 1.3E-01 |
| AT2G39855 | AT2G39855 | plant/protein                                                           | -2.1 | 1.1E-02 | 3.5E-02 | -1.7 | 5.0E-02 | 2.9E-01 |
| AT3G09940 | MDHAR     | monodehydroascorbate reductase                                          | -2.1 | 6.0E-04 | 3.2E-03 | 1.0  | 8.9E-01 | 9.7E-01 |



|           |           |                                                                        |      |         |         |      |         |         |
|-----------|-----------|------------------------------------------------------------------------|------|---------|---------|------|---------|---------|
| AT5G43180 | AT5G43180 | transmembrane protein, putative (Protein of unknown function, DUF599)  | -2.1 | 1.7E-04 | 1.1E-03 | 1.3  | 1.0E-01 | 4.1E-01 |
| AT1G50560 | CYP705A25 | cytochrome P450, family 705, subfamily A, polypeptide 25               | -2.1 | 1.9E-06 | 2.5E-05 | -1.3 | 3.1E-02 | 2.3E-01 |
| AT5G42280 | AT5G42280 | Cysteine/Histidine-rich C1 domain family protein                       | -2.1 | 8.2E-07 | 1.2E-05 | -1.3 | 5.1E-02 | 2.9E-01 |
| AT3G51570 | AT3G51570 | Disease resistance protein (TIR-NBS-LRR class) family                  | -2.1 | 8.4E-03 | 2.8E-02 | -2.0 | 1.3E-02 | 1.5E-01 |
| AT3G01760 | AT3G01760 | Transmembrane amino acid transporter family protein                    | -2.1 | 9.6E-04 | 4.7E-03 | -1.3 | 2.5E-01 | 6.0E-01 |
| AT1G72060 | AT1G72060 | serine-type endopeptidase inhibitor                                    | -2.1 | 6.8E-03 | 2.4E-02 | -1.5 | 1.1E-01 | 4.2E-01 |
| AT4G15330 | CYP705A1  | cytochrome P450, family 705, subfamily A, polypeptide 1                | -2.1 | 4.4E-05 | 3.5E-04 | -1.1 | 3.9E-01 | 7.2E-01 |
| AT1G63300 | AT1G63300 | Myosin heavy chain-related protein                                     | -2.1 | 3.9E-10 | 1.6E-08 | -1.3 | 2.4E-03 | 6.2E-02 |
| AT1G10070 | BCAT-2    | branched-chain amino acid transaminase 2                               | -2.1 | 1.8E-03 | 7.8E-03 | -1.6 | 3.8E-02 | 2.6E-01 |
| AT3G48550 | AT3G48550 | SHOOT GRAVITROPISM-like protein                                        | -2.1 | 1.9E-05 | 1.7E-04 | -1.3 | 7.0E-02 | 3.4E-01 |
| AT1G80130 | AT1G80130 | Tetratricopeptide repeat (TPR)-like superfamily protein                | -2.1 | 9.2E-03 | 3.0E-02 | -1.2 | 4.1E-01 | 7.3E-01 |
| AT4G06701 | AT4G06701 |                                                                        | -2.1 | 3.5E-05 | 2.9E-04 | -1.4 | 4.5E-02 | 2.8E-01 |
| AT2G21820 | AT2G21820 | seed maturation protein                                                | -2.1 | 2.3E-03 | 9.6E-03 | 1.1  | 7.6E-01 | 9.2E-01 |
| AT2G29750 | UGT71C1   | UDP-glucosyl transferase 71C1                                          | -2.1 | 9.8E-07 | 1.4E-05 | -1.1 | 2.7E-01 | 6.2E-01 |
| AT5G42630 | ATS       | Homeodomain-like superfamily protein                                   | -2.1 | 3.4E-03 | 1.3E-02 | 1.0  | 8.3E-01 | 9.5E-01 |
| AT1G54000 | GLL22     | GDLS-like Lipase/Acylhydrolase superfamily protein                     | -2.1 | 6.6E-04 | 3.5E-03 | 1.0  | 8.5E-01 | 9.5E-01 |
| AT3G46330 | MEE39     | Leucine-rich repeat protein kinase family protein                      | -2.1 | 4.0E-03 | 1.5E-02 | -1.2 | 3.8E-01 | 7.1E-01 |
| AT3G53210 | UMAMIT6   | nodulin MtN21 /EamA-like transporter family protein                    | -2.1 | 3.7E-05 | 3.1E-04 | -1.1 | 6.8E-01 | 8.8E-01 |
| AT4G30120 | HMA3      | heavy metal atpase 3                                                   | -2.1 | 2.5E-03 | 1.0E-02 | -1.2 | 3.5E-01 | 6.9E-01 |
| AT5G18910 | AT5G18910 | Protein kinase superfamily protein                                     | -2.1 | 1.7E-02 | 4.9E-02 | -1.2 | 4.1E-01 | 7.3E-01 |
| AT1G66280 | BGLU22    | Glycosyl hydrolase superfamily protein                                 | -2.1 | 6.0E-06 | 6.6E-05 | -1.1 | 7.0E-01 | 8.9E-01 |
| AT4G25260 | AT4G25260 | Plant invertase/pectin methylesterase inhibitor superfamily protein    | -2.1 | 7.0E-04 | 3.6E-03 | -1.4 | 8.1E-02 | 3.6E-01 |
| AT5G48090 | ELP1      | EDM2-like protein1                                                     | -2.1 | 2.2E-03 | 9.4E-03 | -1.3 | 1.7E-01 | 5.0E-01 |
| AT4G29190 | OZF2      | Zinc finger C-x8-C-x5-C-x3-H type family protein                       | -2.1 | 1.9E-04 | 1.2E-03 | -1.3 | 1.5E-01 | 4.8E-01 |
| AT1G04490 | AT1G04490 | hypothetical protein (DUF3527)                                         | -2.1 | 7.1E-03 | 2.5E-02 | 1.4  | 1.8E-01 | 5.2E-01 |
| AT3G13640 | ABCE1     | RNAse I inhibitor protein 1                                            | -2.1 | 3.3E-03 | 1.3E-02 | 1.1  | 7.0E-01 | 8.9E-01 |
| AT1G07880 | ATMPK13   | Protein kinase superfamily protein                                     | -2.1 | 9.5E-05 | 6.8E-04 | -1.5 | 1.3E-02 | 1.5E-01 |
| AT1G10550 | XTH33     | xyloglucan:xyloglucosyl transferase 33                                 | -2.1 | 6.7E-04 | 3.5E-03 | -1.3 | 1.4E-01 | 4.8E-01 |
| AT5G12930 | AT5G12930 | inactive rhomboid protein                                              | -2.1 | 2.1E-05 | 1.8E-04 | -1.1 | 4.2E-01 | 7.3E-01 |
| AT1G70990 | AT1G70990 | proline-rich family protein                                            | -2.1 | 6.2E-05 | 4.7E-04 | -1.3 | 1.0E-01 | 4.0E-01 |
| AT2G23330 | AT2G23330 | transposable_element_gene                                              | -2.1 | 1.9E-08 | 4.6E-07 | -1.4 | 2.4E-03 | 6.1E-02 |
| AT3G62780 | AT3G62780 | Calcium-dependent lipid-binding (CaLB domain) family protein           | -2.1 | 2.2E-03 | 9.5E-03 | -1.2 | 3.1E-01 | 6.6E-01 |
| AT1G08650 | PPCK1     | phosphoenolpyruvate carboxylase kinase 1                               | -2.1 | 4.1E-09 | 1.3E-07 | -1.0 | 9.6E-01 | 9.9E-01 |
| AT5G20420 | CHR42     | chromatin remodeling 42                                                | -2.1 | 5.5E-04 | 3.0E-03 | -1.1 | 4.5E-01 | 7.6E-01 |
| AT5G08185 | MIR162A   | microRNA162A                                                           | -2.1 | 1.1E-06 | 1.6E-05 | -1.2 | 1.4E-01 | 4.8E-01 |
| AT5G40780 | LHT1      | lysine histidine transporter 1                                         | -2.1 | 7.7E-06 | 8.1E-05 | 1.2  | 2.7E-01 | 6.2E-01 |
| AT3G50890 | HB28      | homeobox protein 28                                                    | -2.1 | 7.0E-04 | 3.6E-03 | -1.3 | 2.1E-01 | 5.6E-01 |
| AT1G78130 | UNE2      | Major facilitator superfamily protein                                  | -2.1 | 1.9E-07 | 3.4E-06 | -1.2 | 7.3E-02 | 3.5E-01 |
| AT5G22355 | AT5G22355 | Cysteine/Histidine-rich C1 domain family protein                       | -2.1 | 5.2E-07 | 8.0E-06 | -1.2 | 1.9E-01 | 5.3E-01 |
| AT3G61680 | AT3G61680 | alpha/beta-Hydrolases superfamily protein                              | -2.1 | 8.6E-05 | 6.2E-04 | -1.2 | 2.7E-01 | 6.1E-01 |
| AT1G26960 | AtHB23    | homeobox protein 23                                                    | -2.0 | 2.2E-08 | 5.2E-07 | -1.1 | 1.4E-01 | 4.8E-01 |
| AT1G61950 | CPK19     | calcium-dependent protein kinase 19                                    | -2.0 | 2.0E-03 | 8.6E-03 | 1.1  | 6.5E-01 | 8.7E-01 |
| AT1G34540 | CYP94D1   | cytochrome P450, family 94, subfamily D, polypeptide 1                 | -2.0 | 3.7E-03 | 1.4E-02 | -1.2 | 3.8E-01 | 7.1E-01 |
| AT2G16060 | HB1       | hemoglobin 1                                                           | -2.0 | 6.3E-03 | 2.2E-02 | -1.9 | 1.3E-02 | 1.5E-01 |
| AT2G47015 | MIR408    |                                                                        | -2.0 | 1.8E-03 | 8.0E-03 | -1.2 | 3.2E-01 | 6.7E-01 |
| AT1G22065 | AT1G22065 | hypothetical protein                                                   | -2.0 | 2.0E-03 | 8.7E-03 | -1.1 | 7.2E-01 | 9.0E-01 |
| AT5G59010 | BSK5      | kinase with tetratricopeptide repeat domain-containing protein         | -2.0 | 3.5E-07 | 5.7E-06 | -1.2 | 6.7E-02 | 3.3E-01 |
| AT5G01700 | AT5G01700 | Protein phosphatase 2C family protein                                  | -2.0 | 5.2E-10 | 2.1E-08 | -1.4 | 5.8E-05 | 5.7E-03 |
| AT1G35330 | AT1G35330 | RING/U-box superfamily protein                                         | -2.0 | 8.1E-05 | 5.9E-04 | -1.6 | 4.4E-03 | 8.4E-02 |
| AT2G31860 | AT2G31860 | pseudogene of poly(ADP-ribose) glycohydrolase 2                        | -2.0 | 8.2E-03 | 2.8E-02 | -1.3 | 3.3E-01 | 6.8E-01 |
| AT5G51810 | GA20OX2   | gibberellin 20 oxidase 2                                               | -2.0 | 1.8E-03 | 7.9E-03 | -1.3 | 1.5E-01 | 4.9E-01 |
| AT1G33440 | AT1G33440 | Major facilitator superfamily protein                                  | -2.0 | 1.6E-04 | 1.0E-03 | -1.3 | 8.0E-02 | 3.6E-01 |
| AT1G54120 | AT1G54120 | hypothetical protein                                                   | -2.0 | 4.9E-05 | 3.9E-04 | 1.1  | 4.7E-01 | 7.7E-01 |
| AT5G55250 | IAMT1     | IAA carboxylmethyltransferase 1                                        | -2.0 | 1.5E-04 | 9.9E-04 | 1.2  | 3.7E-01 | 7.0E-01 |
| AT5G46260 | AT5G46260 | disease resistance protein (TIR-NBS-LRR class)                         | -2.0 | 7.2E-03 | 2.5E-02 | -1.0 | 9.9E-01 | 1.0E+00 |
| AT1G60110 | AT1G60110 | Mannose-binding lectin superfamily protein                             | -2.0 | 8.7E-03 | 2.9E-02 | -1.4 | 2.0E-01 | 5.5E-01 |
| AT5G63350 | AT5G63350 | von willebrand factor A domain protein                                 | -2.0 | 6.9E-03 | 2.4E-02 | 1.6  | 2.9E-02 | 2.2E-01 |
| AT4G12270 | AT4G12270 | Copper amine oxidase family protein                                    | -2.0 | 3.0E-03 | 1.2E-02 | -1.2 | 3.5E-01 | 6.8E-01 |
| AT2G03590 | UPS1      | ureide permease 1                                                      | -2.0 | 6.7E-08 | 1.4E-06 | -1.0 | 9.9E-01 | 1.0E+00 |
| AT5G03570 | IREG2     | iron regulated 2                                                       | -2.0 | 3.3E-05 | 2.8E-04 | -1.0 | 8.2E-01 | 9.4E-01 |
| AT2G22970 | SCPL11    | serine carboxypeptidase-like 11                                        | -2.0 | 4.9E-08 | 1.0E-06 | -1.3 | 9.4E-03 | 1.2E-01 |
| AT2G02630 | AT2G02630 | Cysteine/Histidine-rich C1 domain family protein                       | -2.0 | 1.3E-03 | 6.3E-03 | -1.7 | 8.9E-03 | 1.2E-01 |
| AT1G19540 | AT1G19540 | NmrA-like negative transcriptional regulator family protein            | -2.0 | 9.8E-05 | 6.9E-04 | -1.6 | 3.7E-03 | 7.6E-02 |
| AT5G44210 | ERF9      | erf domain protein 9                                                   | -2.0 | 1.3E-04 | 8.6E-04 | 1.1  | 6.8E-01 | 8.8E-01 |
| AT1G60130 | AT1G60130 | Mannose-binding lectin superfamily protein                             | -2.0 | 5.0E-03 | 1.9E-02 | -1.2 | 3.1E-01 | 6.5E-01 |
| AT1G61260 | AT1G61260 | cotton fiber (DUF761)                                                  | -2.0 | 3.8E-08 | 8.2E-07 | -1.3 | 1.0E-02 | 1.3E-01 |
| AT1G09570 | PHYA      | phytochrome A                                                          | -2.0 | 6.2E-10 | 2.4E-08 | -1.3 | 6.6E-03 | 1.0E-01 |
| AT1G18990 | AT1G18990 | myosin-binding protein, putative (Protein of unknown function, DUF593) | -2.0 | 3.0E-03 | 1.2E-02 | -1.4 | 1.8E-01 | 5.2E-01 |
| AT5G19170 | AT5G19170 | NEP-interacting protein, putative (DUF239)                             | -2.0 | 1.4E-04 | 9.5E-04 | -1.2 | 2.0E-01 | 5.4E-01 |
| AT3G61028 | AT3G61028 | Putative endonuclease or glycosyl hydrolase                            | -2.0 | 1.1E-02 | 3.5E-02 | -2.6 | 2.2E-03 | 5.8E-02 |

|           |           |                                                        |      |         |         |      |         |         |
|-----------|-----------|--------------------------------------------------------|------|---------|---------|------|---------|---------|
| AT2G43535 | AT2G43535 | Scorpion toxin-like knottin superfamily protein        | -2.0 | 1.6E-03 | 7.1E-03 | -1.2 | 4.4E-01 | 7.5E-01 |
| AT5G53830 | AT5G53830 | VQ motif-containing protein                            | -2.0 | 8.0E-06 | 8.3E-05 | -1.2 | 1.2E-01 | 4.4E-01 |
| AT2G15400 | NRPE3B    | DNA-directed RNA polymerase family protein             | -2.0 | 7.4E-03 | 2.6E-02 | -1.3 | 3.0E-01 | 6.5E-01 |
| AT5G08000 | E13L3     | glucan endo-1,3-beta-glucosidase-like protein 3        | -2.0 | 2.1E-05 | 1.9E-04 | -1.1 | 5.3E-01 | 8.1E-01 |
| AT3G26220 | CYP71B3   | cytochrome P450, family 71, subfamily B, polypeptide 3 | -2.0 | 3.7E-05 | 3.0E-04 | -1.3 | 1.2E-01 | 4.3E-01 |
| AT1G67910 | AT1G67910 | hypothetical protein                                   | -2.0 | 3.5E-06 | 4.1E-05 | -1.4 | 6.9E-03 | 1.1E-01 |
| AT3G06450 | AT3G06450 | HCO3- transporter family                               | -2.0 | 4.0E-10 | 1.7E-08 | 1.0  | 8.5E-01 | 9.5E-01 |

| uvr8 UV/WL Down |           |                                                                                           | Col UV/WL    |         |                 | uvr8 UV/WL    |         |                 |
|-----------------|-----------|-------------------------------------------------------------------------------------------|--------------|---------|-----------------|---------------|---------|-----------------|
| AGI             | gene      | description                                                                               | Col_UV/WL_FC | pvalue  | pvalue_with_FDR | uvr8_UV/WL_FC | pvalue  | pvalue_with_FDR |
| AT1G57800       | VIM5      | zinc finger (C3HC4-type RING finger) family protein                                       | -1.5         | 3.8E-01 | 5.3E-01         | -5.0          | 1.0E-03 | 3.7E-02         |
| AT1G52040       | MBP1      | myosinase-binding protein 1                                                               | 2.0          | 5.4E-02 | 1.2E-01         | -4.4          | 6.9E-04 | 3.0E-02         |
| AT1G70720       | AT1G70720 | Plant invertase/pectin methylesterase inhibitor superfamily protein                       | -2.0         | 4.5E-02 | 1.1E-01         | -4.1          | 1.8E-04 | 1.2E-02         |
| AT2G36110       | AT2G36110 | Polynucleotidyl transferase, ribonuclease H-like superfamily protein                      | -1.7         | 8.8E-02 | 1.8E-01         | -3.1          | 2.3E-04 | 1.5E-02         |
| AT3G45638       | AT3G45638 |                                                                                           | 1.1          | 8.6E-01 | 9.1E-01         | -2.9          | 7.3E-04 | 3.1E-02         |
| AT1G63380       | AT1G63380 | NAD(P)-binding Rossmann-fold superfamily protein                                          | -2.1         | 3.8E-02 | 9.4E-02         | -2.8          | 1.6E-03 | 4.8E-02         |
| AT5G65158       | PLAT3     | Lipase/lipoxygenase, PLAT/LH2 family protein                                              | -1.2         | 4.6E-01 | 6.0E-01         | -2.8          | 1.3E-03 | 4.4E-02         |
| AT4G10265       | AT4G10265 | Wound-responsive family protein                                                           | -1.4         | 2.4E-01 | 3.8E-01         | -2.8          | 1.0E-03 | 3.7E-02         |
| AT1G74890       | ARR15     | response regulator 15                                                                     | -1.0         | 8.9E-01 | 9.4E-01         | -2.7          | 8.0E-06 | 1.3E-03         |
| AT3G23510       | AT3G23510 | Cyclopropane-fatty-acyl-phospholipid synthase                                             | -1.0         | 9.2E-01 | 9.5E-01         | -2.7          | 2.1E-07 | 9.0E-05         |
| AT1G69230       | SP1L2     | SPIRAL1-like2                                                                             | 1.0          | 8.6E-01 | 9.1E-01         | -2.6          | 2.6E-04 | 1.6E-02         |
| AT3G22100       | AT3G22100 | basic helix-loop-helix (bHLH) DNA-binding superfamily protein                             | -1.8         | 2.2E-02 | 6.2E-02         | -2.6          | 8.3E-04 | 3.3E-02         |
| AT4G33560       | AT4G33560 | Wound-responsive family protein                                                           | -1.8         | 2.6E-02 | 6.9E-02         | -2.6          | 3.0E-04 | 1.7E-02         |
| AT4G26260       | MIOX4     | myo-inositol oxygenase 4                                                                  | 2.2          | 2.5E-04 | 1.5E-03         | -2.5          | 8.8E-05 | 7.6E-03         |
| AT1G06830       | AT1G06830 | Glutaredoxin family protein                                                               | 1.3          | 1.4E-01 | 2.6E-01         | -2.5          | 1.6E-05 | 2.3E-03         |
| AT3G13403       | AT3G13403 | Defensin-like (DEFL) family protein                                                       | -1.8         | 4.6E-02 | 1.1E-01         | -2.4          | 6.2E-04 | 2.8E-02         |
| AT5G47980       | AT5G47980 | HXXXD-type acyl-transferase family protein                                                | -1.5         | 4.3E-02 | 1.0E-01         | -2.3          | 1.4E-04 | 1.1E-02         |
| AT1G76650       | CML38     | calmodulin-like 38                                                                        | -1.4         | 1.5E-01 | 2.7E-01         | -2.2          | 5.3E-04 | 2.5E-02         |
| AT3G28960       | AT3G28960 | Transmembrane amino acid transporter family protein                                       | -1.7         | 9.9E-04 | 4.8E-03         | -2.1          | 2.6E-05 | 3.3E-03         |
| AT3G22570       | AT3G22570 | Bifunctional inhibitor/lipid-transfer protein/seed storage 2S albumin superfamily protein | -1.8         | 4.6E-03 | 1.7E-02         | -2.1          | 2.8E-04 | 1.7E-02         |
| AT3G59710       | AT3G59710 | NAD(P)-binding Rossmann-fold superfamily protein                                          | -1.8         | 3.5E-03 | 1.4E-02         | -2.1          | 4.2E-04 | 2.1E-02         |
| AT5G37478       | AT5G37478 | TPX2 (targeting protein for Xklp2) protein family                                         | -1.3         | 1.5E-01 | 2.7E-01         | -2.1          | 9.0E-04 | 3.5E-02         |
| AT1G19050       | ARR7      | response regulator 7                                                                      | -1.5         | 2.9E-03 | 1.2E-02         | -2.1          | 5.4E-06 | 1.0E-03         |
| AT1G06520       | GPAT1     | glycerol-3-phosphate acyltransferase 1                                                    | -1.4         | 1.1E-02 | 3.6E-02         | -2.0          | 5.2E-06 | 1.0E-03         |
| AT2G43520       | T12       | trypsin inhibitor protein 2                                                               | -1.8         | 7.1E-04 | 3.7E-03         | -2.0          | 9.5E-05 | 8.0E-03         |
