# Supplementary material for: Degradation of the transcription factors PIF4 and PIF5 under UV‐B promotes UVR8‐mediated inhibition of hypocotyl growth in Arabidopsis
Source: PubMed Central journal article supplement — Plant J. 2019 Nov 7;101(3):507–17. doi: 10.1111/tpj.14556 (PMC7027837; doi:10.1111/tpj.14556), 2019-11-07
Supplement: TPJ-101-507-s003.pdf [file TPJ-101-507-s003.pdf]

**Table S2. UV-B-repressed genes in Col wild type and/or genes misexpressed in *pif4-101 pif5-3* in white light grown plants (lists corresponding to Figure 2E).**

**Description**

[Col UV/WL Down and \*pif45\* /Col WL Down: 153 genes](#)

[Col UV/WL Down and \*pif45\* /Col WL Up: 4 genes](#)

[pif45 /Col WL Down: 238 genes](#)

[pif45 /Col WL Up: 116 genes](#)

[Col UV/WL Down: 606 genes](#)

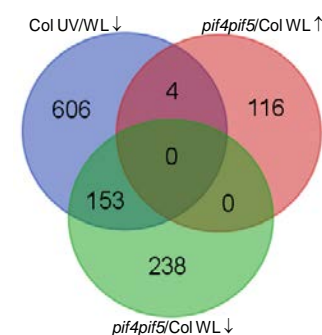

| Col UV/WL Down and <i>pif45</i> /Col WL Down |                  |                                                                                               | Col UV/WL    |         |                 | <i>pif45</i> /Col WL    |         |                 |
|----------------------------------------------|------------------|-----------------------------------------------------------------------------------------------|--------------|---------|-----------------|-------------------------|---------|-----------------|
| AGI                                          | gene             | description                                                                                   | Col_UV/WL_FC | pvalue  | pvalue_with_FDR | <i>pif45</i> /Col_WL_FC | pvalue  | pvalue_with_FDR |
| AT1G15405                                    | <i>AT1G15405</i> |                                                                                               | -51.7        | 2.9E-05 | 2.5E-04         | -46.6                   | 3.3E-05 | 1.5E-03         |
| AT5G37940                                    | <i>AT5G37940</i> | Zinc-binding dehydrogenase family protein                                                     | -50.3        | 3.1E-04 | 1.8E-03         | -14.3                   | 1.1E-03 | 1.7E-02         |
| ATCG00700                                    | <i>PSBN</i>      | photosystem II reaction center protein N                                                      | -26.2        | 2.5E-04 | 1.5E-03         | -13.9                   | 6.5E-04 | 1.2E-02         |
| AT4G10160                                    | <i>AT4G10160</i> | RING/U-box superfamily protein                                                                | -25.9        | 1.4E-06 | 1.9E-05         | -16.5                   | 3.5E-06 | 3.3E-04         |
| AT5G66260                                    | <i>AT5G66260</i> | SAUR-like auxin-responsive protein family                                                     | -25.2        | 4.3E-08 | 9.3E-07         | -8.9                    | 1.0E-06 | 1.4E-04         |
| AT2G31141                                    | <i>AT2G31141</i> | hypothetical protein                                                                          | -19.8        | 8.5E-05 | 6.1E-04         | -17.0                   | 1.2E-04 | 3.5E-03         |
| AT4G37770                                    | <i>ACS8</i>      | 1-amino-cyclopropane-1-carboxylate synthase 8                                                 | -14.6        | 5.2E-05 | 4.1E-04         | -9.8                    | 1.4E-04 | 3.9E-03         |
| AT1G28450                                    | <i>AGL58</i>     | AGAMOUS-like 58                                                                               | -13.0        | 1.3E-04 | 8.7E-04         | -5.1                    | 1.4E-03 | 1.9E-02         |
| AT4G13790                                    | <i>AT4G13790</i> | SAUR-like auxin-responsive protein family                                                     | -11.9        | 9.7E-03 | 3.2E-02         | -44.5                   | 2.0E-03 | 2.5E-02         |
| AT5G37300                                    | <i>WSD1</i>      | O-acyltransferase (WSD1-like) family protein                                                  | -11.7        | 2.9E-05 | 2.5E-04         | -15.5                   | 1.0E-05 | 6.9E-04         |
| AT5G44440                                    | <i>AT5G44440</i> | FAD-binding Berberine family protein                                                          | -11.6        | 1.8E-07 | 3.1E-06         | -12.3                   | 1.2E-07 | 3.0E-05         |
| ATCG00210                                    | <i>YCF6</i>      | electron transporter, transferring electrons within cytochrome b6/f complex of photosystem II | -9.9         | 1.3E-03 | 5.9E-03         | -6.2                    | 4.0E-03 | 4.0E-02         |
| ATMG01380                                    | <i>RRN5</i>      |                                                                                               | -9.7         | 4.0E-04 | 2.3E-03         | -27.3                   | 2.1E-05 | 1.1E-03         |
| AT3G23635                                    | <i>RTFL13</i>    | ROTUNDIFOLIA like 13                                                                          | -9.7         | 4.6E-06 | 5.3E-05         | -6.5                    | 2.0E-05 | 1.1E-03         |
| AT3G43400                                    | <i>AT3G43400</i> | ELMO/CED-12 family protein                                                                    | -8.8         | 1.4E-02 | 4.3E-02         | -32.7                   | 2.2E-03 | 2.7E-02         |
| AT2G01010                                    | <i>AT2G01010</i> |                                                                                               | -8.7         | 9.5E-04 | 4.7E-03         | -7.2                    | 1.6E-03 | 2.2E-02         |
| AT3G14370                                    | <i>WAG2</i>      | Protein kinase superfamily protein                                                            | -8.5         | 1.1E-10 | 5.4E-09         | -3.8                    | 2.6E-07 | 5.2E-05         |
| AT5G07010                                    | <i>ST2A</i>      | sulfotransferase 2A                                                                           | -7.8         | 2.6E-06 | 3.3E-05         | -12.5                   | 1.6E-07 | 3.7E-05         |
| AT1G52830                                    | <i>IAA6</i>      | indole-3-acetic acid 6                                                                        | -7.8         | 4.5E-06 | 5.2E-05         | -14.9                   | 1.4E-07 | 3.4E-05         |
| AT1G80740                                    | <i>CMT1</i>      | chromomethylase 1                                                                             | -7.8         | 1.8E-05 | 1.6E-04         | -8.6                    | 8.3E-06 | 6.1E-04         |
| AT5G37950                                    | <i>AT5G37950</i> | UDP-Glycosyltransferase superfamily protein                                                   | -7.5         | 3.6E-09 | 1.1E-07         | -13.7                   | 5.4E-11 | 3.1E-07         |
| ATCG01210                                    | <i>RRN16S.2</i>  |                                                                                               | -7.2         | 3.5E-03 | 1.4E-02         | -7.6                    | 2.8E-03 | 3.2E-02         |
| AT4G25420                                    | <i>GA20OX1</i>   | 2-oxoglutarate (2OG) and Fe(II)-dependent oxygenase superfamily protein                       | -7.1         | 6.1E-08 | 1.2E-06         | -5.0                    | 8.7E-07 | 1.3E-04         |
| AT3G41768                                    | <i>AT3G41768</i> |                                                                                               | -6.6         | 5.1E-03 | 1.9E-02         | -7.6                    | 3.1E-03 | 3.4E-02         |
| AT2G23170                                    | <i>GH3.3</i>     | Auxin-responsive GH3 family protein                                                           | -6.6         | 2.0E-07 | 3.5E-06         | -2.7                    | 4.5E-04 | 9.1E-03         |
| AT4G27460                                    | <i>CBSX5</i>     | Cystathionine beta-synthase (CBS) family protein                                              | -6.4         | 4.9E-06 | 5.5E-05         | -2.8                    | 2.3E-03 | 2.8E-02         |
| AT1G18835                                    | <i>MIF3</i>      | mini zinc finger                                                                              | -6.4         | 8.3E-05 | 6.0E-04         | -4.8                    | 2.6E-04 | 6.3E-03         |
| AT2G01770                                    | <i>VIT1</i>      | vacuolar iron transporter 1                                                                   | -6.2         | 5.4E-03 | 2.0E-02         | -6.7                    | 3.7E-03 | 3.8E-02         |
| AT3G13900                                    | <i>AT3G13900</i> | ATPase E1-E2 type family protein / haloacid dehalogenase-like hydrolase family protein        | -6.0         | 4.1E-08 | 8.9E-07         | -4.5                    | 3.4E-07 | 6.2E-05         |
| AT1G67265                                    | <i>RTFL21</i>    | ROTUNDIFOLIA like 21                                                                          | -5.8         | 9.8E-06 | 9.9E-05         | -3.2                    | 5.6E-04 | 1.1E-02         |
| AT3G02670                                    | <i>AT3G02670</i> | Glycine-rich protein family                                                                   | -5.8         | 8.4E-09 | 2.3E-07         | -9.3                    | 1.2E-10 | 3.1E-07         |
| AT1G73220                                    | <i>NA</i>        | organic cation/carnitine transporter1                                                         | -5.7         | 5.5E-06 | 6.0E-05         | -2.8                    | 1.1E-03 | 1.7E-02         |
| AT5G22500                                    | <i>FAR1</i>      | fatty acid reductase 1                                                                        | -5.7         | 1.1E-05 | 1.1E-04         | -8.9                    | 4.7E-07 | 7.9E-05         |
| AT3G15540                                    | <i>IAA19</i>     | indole-3-acetic acid inducible 19                                                             | -5.6         | 8.2E-07 | 1.2E-05         | -9.3                    | 1.5E-08 | 9.0E-06         |
| AT5G12940                                    | <i>AT5G12940</i> | Leucine-rich repeat (LRR) family protein                                                      | -5.6         | 2.5E-08 | 5.9E-07         | -3.4                    | 5.9E-06 | 4.9E-04         |
| AT5G51210                                    | <i>OLEO3</i>     | oleosin3                                                                                      | -5.5         | 7.6E-05 | 5.6E-04         | -6.4                    | 2.9E-05 | 1.4E-03         |
| AT4G10020                                    | <i>HSD5</i>      | hydroxysteroid dehydrogenase 5                                                                | -5.5         | 4.3E-05 | 3.5E-04         | -6.0                    | 2.2E-05 | 1.1E-03         |
| AT1G17810                                    | <i>BETA-TIP</i>  | beta-tonoplast intrinsic protein                                                              | -5.5         | 2.2E-05 | 1.9E-04         | -3.1                    | 1.3E-03 | 1.9E-02         |
| AT1G53690                                    | <i>AT1G53690</i> | DNA directed RNA polymerase, 7 kDa subunit                                                    | -5.3         | 3.6E-08 | 7.9E-07         | -3.4                    | 2.6E-06 | 2.8E-04         |
| AT1G04180                                    | <i>YUC9</i>      | YUCCA 9                                                                                       | -5.3         | 3.4E-05 | 2.9E-04         | -4.4                    | 1.2E-04 | 3.7E-03         |
| AT4G35720                                    | <i>AT4G35720</i> | DUF241 domain protein, putative (DUF241)                                                      | -5.1         | 5.1E-06 | 5.7E-05         | -8.7                    | 9.4E-08 | 2.7E-05         |
| AT2G42990                                    | <i>AT2G42990</i> | GDSL-like Lipase/Acylhydrolase superfamily protein                                            | -5.1         | 2.0E-08 | 4.8E-07         | -2.4                    | 9.3E-05 | 3.1E-03         |
| AT1G62770                                    | <i>AT1G62770</i> | Plant invertase/pectin methyltransferase inhibitor superfamily protein                        | -5.1         | 1.9E-12 | 1.6E-10         | -2.5                    | 2.8E-07 | 5.4E-05         |
| AT5G57240                                    | <i>ORP4C</i>     | OSBP(oxysterol binding protein)-related protein 4C                                            | -5.0         | 3.0E-09 | 9.5E-08         | -2.5                    | 2.8E-05 | 1.3E-03         |
| AT3G28857                                    | <i>PRE5</i>      | basic helix-loop-helix (bHLH) DNA-binding family protein                                      | -5.0         | 6.4E-05 | 4.9E-04         | -5.8                    | 2.0E-05 | 1.1E-03         |
| AT2G22810                                    | <i>ACS4</i>      | 1-aminocyclopropane-1-carboxylate synthase 4                                                  | -4.8         | 7.1E-04 | 3.7E-03         | -19.5                   | 2.2E-06 | 2.5E-04         |
| AT2G19660                                    | <i>AT2G19660</i> | Cysteine/Histidine-rich C1 domain family protein                                              | -4.8         | 1.1E-11 | 7.0E-10         | -2.9                    | 2.5E-08 | 1.3E-05         |
| AT1G29490                                    | <i>AT1G29490</i> | SAUR-like auxin-responsive protein family                                                     | -4.8         | 1.1E-04 | 7.9E-04         | -4.5                    | 1.4E-04 | 4.0E-03         |
| AT5G06720                                    | <i>PA2</i>       | peroxidase 2                                                                                  | -4.8         | 2.9E-07 | 4.9E-06         | -6.2                    | 2.3E-08 | 1.2E-05         |
| AT5G63820                                    | <i>AT5G63820</i> | hypothetical protein (DUF626)                                                                 | -4.8         | 7.1E-08 | 1.4E-06         | -3.8                    | 8.2E-07 | 1.2E-04         |
| AT1G06080                                    | <i>ADS1</i>      | delta 9 desaturase 1                                                                          | -4.6         | 5.9E-06 | 6.4E-05         | -2.5                    | 1.7E-03 | 2.2E-02         |
| AT3G48300                                    | <i>CYP71A23</i>  | cytochrome P450, family 71, subfamily A, polypeptide 23                                       | -4.6         | 4.2E-04 | 2.4E-03         | -3.1                    | 2.7E-03 | 3.1E-02         |
| AT1G20520                                    | <i>AT1G20520</i> | DUF241 domain protein, putative (DUF241)                                                      | -4.4         | 1.4E-03 | 6.5E-03         | -20.5                   | 4.9E-06 | 4.3E-04         |
| AT1G08500                                    | <i>ENODL18</i>   | early nodulin-like protein 18                                                                 | -4.3         | 1.9E-13 | 2.2E-11         | -2.3                    | 4.1E-08 | 1.6E-05         |
| AT4G01335                                    | <i>AT4G01335</i> | TATA box-binding protein associated factor RNA polymerase I subunit B-like protein            | -4.2         | 6.2E-06 | 6.7E-05         | -3.1                    | 8.8E-05 | 3.0E-03         |
| AT5G15430                                    | <i>AT5G15430</i> | Plant calmodulin-binding protein-like protein                                                 | -4.2         | 7.0E-04 | 3.6E-03         | -4.1                    | 6.0E-04 | 1.1E-02         |
| AT3G59440                                    | <i>AT3G59440</i> | Calcium-binding EF-hand family protein                                                        | -4.0         | 1.5E-03 | 6.9E-03         | -4.6                    | 6.4E-04 | 1.2E-02         |
| AT1G12080                                    | <i>AT1G12080</i> | Vacuolar calcium-binding protein-like protein                                                 | -4.0         | 9.6E-10 | 3.5E-08         | -4.6                    | 1.3E-10 | 3.1E-07         |
| AT2G18010                                    | <i>AT2G18010</i> | SAUR-like auxin-responsive protein family                                                     | -3.9         | 2.8E-03 | 1.2E-02         | -10.3                   | 3.8E-05 | 1.7E-03         |
| AT2G14900                                    | <i>AT2G14900</i> | Gibberellin-regulated family protein                                                          | -3.8         | 5.1E-10 | 2.1E-08         | -3.6                    | 1.0E-09 | 1.5E-06         |
| AT1G53700                                    | <i>WAG1</i>      | WAG 1                                                                                         | -3.7         | 4.4E-07 | 6.9E-06         | -2.1                    | 8.0E-04 | 1.4E-02         |
| AT4G16515                                    | <i>RGF6</i>      | root meristem growth factor                                                                   | -3.7         | 1.8E-05 | 1.7E-04         | -5.0                    | 1.1E-06 | 1.4E-04         |
| AT1G09350                                    | <i>GolS3</i>     | galactinol synthase 3                                                                         | -3.6         | 3.5E-04 | 2.0E-03         | -3.8                    | 2.3E-04 | 5.7E-03         |

|           |                  |                                                                              |      |         |         |        |         |         |
|-----------|------------------|------------------------------------------------------------------------------|------|---------|---------|--------|---------|---------|
| AT4G32280 | <i>IAA29</i>     | indole-3-acetic acid inducible 29                                            | -3.6 | 2.7E-05 | 2.4E-04 | -14.6  | 4.0E-10 | 6.8E-07 |
| AT1G21520 | <i>AT1G21520</i> | hypothetical protein                                                         | -3.6 | 1.4E-03 | 6.3E-03 | -3.0   | 3.7E-03 | 3.8E-02 |
| AT3G03260 | <i>HDG8</i>      | homeodomain GLABROUS 8                                                       | -3.6 | 5.4E-03 | 2.0E-02 | -102.8 | 1.7E-06 | 2.0E-04 |
| AT5G02540 | <i>AT5G02540</i> | NAD(P)-binding Rossmann-fold superfamily protein                             | -3.5 | 3.8E-04 | 2.2E-03 | -8.1   | 7.8E-07 | 1.2E-04 |
| AT1G63710 | <i>CYP86A7</i>   | cytochrome P450, family 86, subfamily A, polypeptide 7                       | -3.5 | 1.6E-02 | 4.7E-02 | -4.7   | 4.7E-03 | 4.5E-02 |
| AT4G14819 | <i>AT4G14819</i> | hypothetical protein (DUF1677)                                               | -3.5 | 1.6E-04 | 1.1E-03 | -2.8   | 8.8E-04 | 1.5E-02 |
| AT1G11120 | <i>AT1G11120</i> | CTTNBP 2 amino-terminal-like protein                                         | -3.4 | 1.2E-07 | 2.3E-06 | -2.5   | 1.1E-05 | 7.5E-04 |
| AT4G14130 | <i>XTH15</i>     | xyloglucan endotransglucosylase/hydrolase 15                                 | -3.4 | 3.3E-07 | 5.4E-06 | -3.0   | 2.1E-06 | 2.4E-04 |
| AT1G60450 | <i>GolS7</i>     | galactinol synthase 7                                                        | -3.3 | 1.5E-02 | 4.4E-02 | -5.6   | 1.7E-03 | 2.3E-02 |
| AT5G65390 | <i>AGP7</i>      | arabinogalactan protein 7                                                    | -3.3 | 6.4E-09 | 1.8E-07 | -2.3   | 3.2E-06 | 3.1E-04 |
| AT1G65310 | <i>XTH17</i>     | xyloglucan endotransglucosylase/hydrolase 17                                 | -3.3 | 1.4E-05 | 1.3E-04 | -2.6   | 1.8E-04 | 4.9E-03 |
| AT3G29370 | <i>P1R3</i>      | hypothetical protein                                                         | -3.3 | 5.7E-06 | 6.2E-05 | -2.7   | 5.5E-05 | 2.1E-03 |
| AT4G11190 | <i>AT4G11190</i> | Disease resistance-responsive (dirigent-like protein) family protein         | -3.3 | 2.0E-05 | 1.8E-04 | -4.3   | 9.0E-07 | 1.3E-04 |
| AT2G01200 | <i>IAA32</i>     | indole-3-acetic acid inducible 32                                            | -3.2 | 1.1E-03 | 5.3E-03 | -4.8   | 6.7E-05 | 2.5E-03 |
| AT4G16780 | <i>HB-2</i>      | homeobox protein 2                                                           | -3.2 | 8.7E-04 | 4.4E-03 | -2.7   | 3.6E-03 | 3.8E-02 |
| AT1G51530 | <i>AT1G51530</i> | RNA-binding (RRM/RBD/RNP motifs) family protein                              | -3.2 | 2.3E-03 | 9.8E-03 | -4.9   | 1.6E-04 | 4.4E-03 |
| AT1G11545 | <i>XTH8</i>      | xyloglucan endotransglucosylase/hydrolase 8                                  | -3.2 | 1.0E-12 | 8.9E-11 | -2.1   | 3.9E-08 | 1.5E-05 |
| AT5G67020 | <i>AT5G67020</i> | hypothetical protein                                                         | -3.1 | 1.6E-04 | 1.1E-03 | -4.8   | 3.3E-06 | 3.2E-04 |
| AT1G76610 | <i>AT1G76610</i> | MIZU-KUSSEI-like protein (Protein of unknown function, DUF617)               | -3.1 | 4.6E-03 | 1.7E-02 | -3.0   | 4.7E-03 | 4.5E-02 |
| AT4G21730 | <i>AT4G21730</i> | pseudogene of AAA-type ATPase family protein                                 | -3.1 | 4.9E-06 | 5.5E-05 | -2.9   | 8.5E-06 | 6.2E-04 |
| AT3G21330 | <i>AT3G21330</i> | basic helix-loop-helix (bHLH) DNA-binding superfamily protein                | -3.1 | 5.1E-05 | 4.0E-04 | -2.7   | 2.1E-04 | 5.4E-03 |
| AT1G10560 | <i>PUB18</i>     | plant U-box 18                                                               | -3.1 | 1.7E-04 | 1.1E-03 | -2.4   | 1.6E-03 | 2.2E-02 |
| AT3G18530 | <i>AT3G18530</i> | ARM repeat superfamily protein                                               | -3.1 | 5.5E-03 | 2.0E-02 | -3.6   | 2.2E-03 | 2.7E-02 |
| AT5G38970 | <i>BR6OX1</i>    | brassinosteroid-6-oxidase 1                                                  | -3.0 | 6.6E-11 | 3.4E-09 | -2.2   | 3.0E-08 | 1.4E-05 |
| AT3G26170 | <i>CYP71B19</i>  | cytochrome P450, family 71, subfamily B, polypeptide 19                      | -2.9 | 6.4E-05 | 4.9E-04 | -2.3   | 1.1E-03 | 1.7E-02 |
| AT5G50335 | <i>AT5G50335</i> | hypothetical protein                                                         | -2.9 | 1.2E-03 | 5.7E-03 | -3.6   | 2.0E-04 | 5.2E-03 |
| AT1G73120 | <i>AT1G73120</i> | F-box/RNI superfamily protein                                                | -2.9 | 3.1E-03 | 1.3E-02 | -6.1   | 1.2E-05 | 7.6E-04 |
| AT2G43050 | <i>ATPMPCRCD</i> | Plant invertase/pectin methylesterase inhibitor superfamily                  | -2.9 | 1.9E-05 | 1.8E-04 | -2.5   | 9.1E-05 | 3.0E-03 |
| AT1G26730 | <i>AT1G26730</i> | EXS (ERD1/XPR1/SYG1) family protein                                          | -2.8 | 1.6E-05 | 1.5E-04 | -3.1   | 4.8E-06 | 4.2E-04 |
| AT4G08109 | <i>AT4G08109</i> | transposable_element_gene                                                    | -2.8 | 7.3E-04 | 3.8E-03 | -4.9   | 9.6E-06 | 6.7E-04 |
| AT4G21745 | <i>AT4G21745</i> | PAK-box/P21-Rho-binding family protein                                       | -2.7 | 2.1E-04 | 1.3E-03 | -2.7   | 2.0E-04 | 5.2E-03 |
| AT5G18010 | <i>SAUR19</i>    | SAUR-like auxin-responsive protein family                                    | -2.7 | 2.7E-03 | 1.1E-02 | -7.0   | 3.0E-06 | 3.0E-04 |
| AT1G68360 | <i>AT1G68360</i> | C2H2 and C2HC zinc fingers superfamily protein                               | -2.7 | 3.3E-05 | 2.8E-04 | -2.7   | 2.8E-05 | 1.3E-03 |
| AT5G02760 | <i>AT5G02760</i> | Protein phosphatase 2C family protein                                        | -2.7 | 1.5E-05 | 1.4E-04 | -2.3   | 1.6E-04 | 4.4E-03 |
| AT1G26890 | <i>AT1G26890</i> | FBD, F-box and Leucine Rich Repeat domains containing protein                | -2.7 | 8.0E-04 | 4.1E-03 | -4.1   | 2.1E-05 | 1.1E-03 |
| AT3G42800 | <i>AT3G42800</i> | AF-like protein                                                              | -2.7 | 1.8E-04 | 1.2E-03 | -3.0   | 5.4E-05 | 2.1E-03 |
| AT2G46970 | <i>PIL1</i>      | phytochrome interacting factor 3-like 1                                      | -2.7 | 2.2E-03 | 9.4E-03 | -19.1  | 1.1E-08 | 6.8E-06 |
| AT4G10150 | <i>AT4G10150</i> | RING/U-box superfamily protein                                               | -2.7 | 7.6E-04 | 3.9E-03 | -3.5   | 5.8E-05 | 2.2E-03 |
| AT1G74420 | <i>FUT3</i>      | fucosyltransferase 3                                                         | -2.7 | 1.3E-04 | 8.9E-04 | -3.4   | 8.1E-06 | 6.0E-04 |
| AT5G14780 | <i>FDH</i>       | formate dehydrogenase                                                        | -2.7 | 4.8E-08 | 1.0E-06 | -2.7   | 4.4E-08 | 1.6E-05 |
| AT5G13700 | <i>PAO1</i>      | polyamine oxidase 1                                                          | -2.7 | 9.7E-06 | 9.8E-05 | -3.7   | 1.0E-07 | 2.8E-05 |
| AT5G22580 | <i>AT5G22580</i> | Stress responsive A/B Barrel Domain-containing protein                       | -2.7 | 8.1E-06 | 8.4E-05 | -3.7   | 8.2E-08 | 2.5E-05 |
| AT3G18200 | <i>UMAMIT4</i>   | nodulin MtN21 /EamA-like transporter family                                  | -2.7 | 1.1E-08 | 3.0E-07 | -2.3   | 2.6E-07 | 5.1E-05 |
| AT5G61660 | <i>AT5G61660</i> | glycine-rich protein                                                         | -2.6 | 1.2E-05 | 1.2E-04 | -4.7   | 7.1E-09 | 4.9E-06 |
| AT4G12410 | <i>AT4G12410</i> | SAUR-like auxin-responsive protein family                                    | -2.6 | 6.1E-03 | 2.2E-02 | -5.4   | 5.7E-05 | 2.2E-03 |
| AT5G02200 | <i>FHL</i>       | far-red-elongated hypocotyl1-like protein                                    | -2.6 | 4.1E-05 | 3.3E-04 | -2.1   | 5.4E-04 | 1.0E-02 |
| AT1G04660 | <i>AT1G04660</i> | glycine-rich protein                                                         | -2.6 | 3.8E-05 | 3.1E-04 | -3.6   | 5.6E-07 | 9.1E-05 |
| AT2G25000 | <i>WRKY60</i>    | WRKY DNA-binding protein 60                                                  | -2.6 | 1.1E-05 | 1.1E-04 | -3.6   | 7.9E-08 | 2.5E-05 |
| AT3G55840 | <i>AT3G55840</i> | Hs1pro-1 protein                                                             | -2.5 | 2.1E-05 | 1.8E-04 | -2.2   | 1.3E-04 | 3.9E-03 |
| AT4G28720 | <i>YUC8</i>      | Flavin-binding monooxygenase family protein                                  | -2.5 | 3.6E-04 | 2.1E-03 | -2.5   | 3.6E-04 | 7.8E-03 |
| AT1G75900 | <i>AT1G75900</i> | GDSL-like Lipase/Acylhydrolase superfamily protein                           | -2.5 | 6.0E-06 | 6.5E-05 | -4.2   | 2.3E-09 | 2.0E-06 |
| AT1G62610 | <i>AT1G62610</i> | NAD(P)-binding Rossmann-fold superfamily protein                             | -2.5 | 4.1E-08 | 8.8E-07 | -2.2   | 4.9E-07 | 8.2E-05 |
| AT2G45610 | <i>AT2G45610</i> | alpha/beta-Hydrolases superfamily protein                                    | -2.5 | 3.9E-03 | 1.5E-02 | -4.4   | 3.7E-05 | 1.6E-03 |
| AT5G39865 | <i>AT5G39865</i> | Glutaredoxin family protein                                                  | -2.4 | 4.4E-07 | 7.0E-06 | -2.5   | 2.6E-07 | 5.1E-05 |
| AT5G66640 | <i>DAR3</i>      | DA1-related protein 3                                                        | -2.4 | 1.1E-02 | 3.5E-02 | -2.8   | 3.7E-03 | 3.8E-02 |
| AT1G75450 | <i>CKX5</i>      | cytokinin oxidase 5                                                          | -2.4 | 6.1E-04 | 3.2E-03 | -3.6   | 7.2E-06 | 5.5E-04 |
| AT1G66350 | <i>RGL1</i>      | RGA-like 1                                                                   | -2.4 | 5.2E-08 | 1.1E-06 | -2.1   | 1.4E-06 | 1.7E-04 |
| AT4G37580 | <i>HLS1</i>      | Acyl-CoA N-acyltransferases (NAT) superfamily protein                        | -2.4 | 3.6E-04 | 2.1E-03 | -2.4   | 3.5E-04 | 7.6E-03 |
| AT4G11280 | <i>ACS6</i>      | 1-aminocyclopropane-1-carboxylic acid (acc) synthase 6                       | -2.4 | 5.6E-04 | 3.0E-03 | -2.3   | 9.0E-04 | 1.5E-02 |
| AT3G24715 | <i>AT3G24715</i> | kinase superfamily with octicosapeptide/Phox/Bem1p domain-containing protein | -2.4 | 2.3E-10 | 1.1E-08 | -2.3   | 3.0E-10 | 6.5E-07 |
| AT5G24580 | <i>AT5G24580</i> | Heavy metal transport/detoxification superfamily protein                     | -2.4 | 1.6E-03 | 7.3E-03 | -3.7   | 1.6E-05 | 9.3E-04 |
| AT5G41900 | <i>AT5G41900</i> | alpha/beta-Hydrolases superfamily protein                                    | -2.4 | 4.5E-05 | 3.6E-04 | -3.4   | 2.0E-07 | 4.4E-05 |
| AT1G15580 | <i>IAA5</i>      | indole-3-acetic acid inducible 5                                             | -2.3 | 1.2E-02 | 3.8E-02 | -6.5   | 1.7E-05 | 9.6E-04 |
| AT5G63810 | <i>BGAL10</i>    | beta-galactosidase 10                                                        | -2.3 | 5.1E-09 | 1.5E-07 | -2.1   | 9.5E-08 | 2.7E-05 |
| AT1G52190 | <i>AT1G52190</i> | Major facilitator superfamily protein                                        | -2.3 | 8.9E-09 | 2.4E-07 | -2.6   | 4.1E-10 | 6.8E-07 |
| AT5G62280 | <i>AT5G62280</i> | DUF1442 family protein (DUF1442)                                             | -2.3 | 2.0E-04 | 1.2E-03 | -2.5   | 7.3E-05 | 2.6E-03 |
| AT4G18970 | <i>AT4G18970</i> | GDSL-like Lipase/Acylhydrolase superfamily protein                           | -2.3 | 2.7E-06 | 3.3E-05 | -3.0   | 1.5E-08 | 9.0E-06 |
| AT5G04190 | <i>PKS4</i>      | phytochrome kinase substrate 4                                               | -2.3 | 2.3E-05 | 2.0E-04 | -2.1   | 7.3E-05 | 2.6E-03 |
| AT5G47370 | <i>HAT2</i>      | Homeobox-leucine zipper protein 4 (HB-4) / HD-ZIP protein                    | -2.3 | 5.5E-05 | 4.3E-04 | -2.6   | 6.0E-06 | 4.9E-04 |

|           |           |                                                                      |      |         |         |      |         |         |
|-----------|-----------|----------------------------------------------------------------------|------|---------|---------|------|---------|---------|
| AT1G62480 | AT1G62480 | Vacuolar calcium-binding protein-like protein                        | -2.2 | 6.9E-07 | 1.0E-05 | -2.1 | 2.1E-06 | 2.4E-04 |
| AT4G34770 | AT4G34770 | SAUR-like auxin-responsive protein family                            | -2.2 | 7.9E-04 | 4.0E-03 | -4.4 | 2.2E-07 | 4.6E-05 |
| AT3G50800 | AT3G50800 | hypothetical protein                                                 | -2.2 | 3.2E-03 | 1.3E-02 | -2.4 | 1.4E-03 | 2.0E-02 |
| AT3G59010 | PME61     | pectin methylesterase 61                                             | -2.2 | 2.5E-03 | 1.1E-02 | -4.9 | 6.4E-07 | 9.9E-05 |
| AT3G03830 | SAUR28    | SAUR-like auxin-responsive protein family                            | -2.2 | 2.4E-03 | 1.0E-02 | -3.4 | 2.3E-05 | 1.2E-03 |
| AT4G27260 | WES1      | Auxin-responsive GH3 family protein                                  | -2.2 | 3.1E-06 | 3.8E-05 | -2.4 | 6.2E-07 | 9.8E-05 |
| AT5G44260 | AT5G44260 | Zinc finger C-x8-C-x5-C-x3-H type family protein                     | -2.2 | 5.0E-04 | 2.8E-03 | -2.5 | 9.3E-05 | 3.1E-03 |
| AT4G31380 | FLP1      | flowering-promoting factor-like protein                              | -2.2 | 1.5E-02 | 4.4E-02 | -6.0 | 6.3E-06 | 5.1E-04 |
| AT1G31040 | AT1G31040 | PLATZ transcription factor family protein                            | -2.2 | 6.2E-04 | 3.3E-03 | -2.4 | 1.5E-04 | 4.3E-03 |
| AT3G48790 | AT3G48790 | Pyridoxal phosphate (PLP)-dependent transferases superfamily protein | -2.2 | 1.8E-04 | 1.2E-03 | -4.7 | 5.2E-09 | 3.8E-06 |
| AT3G20470 | GRP5      | glycine-rich protein 5                                               | -2.2 | 1.5E-03 | 6.9E-03 | -2.5 | 2.7E-04 | 6.4E-03 |
| AT4G17470 | AT4G17470 | alpha/beta-Hydrolases superfamily protein                            | -2.1 | 2.6E-03 | 1.1E-02 | -3.7 | 5.5E-06 | 4.6E-04 |
| AT4G25260 | AT4G25260 | Plant invertase/pectin methylesterase inhibitor superfamily protein  | -2.1 | 7.0E-04 | 3.6E-03 | -3.2 | 1.8E-06 | 2.2E-04 |
| AT3G50890 | HB28      | homeobox protein 28                                                  | -2.1 | 7.0E-04 | 3.6E-03 | -2.0 | 8.4E-04 | 1.4E-02 |
| AT2G47015 | MIR408    |                                                                      | -2.0 | 1.8E-03 | 8.0E-03 | -2.4 | 3.0E-04 | 7.0E-03 |
| AT5G59010 | BSK5      | kinase with tetratricopeptide repeat domain-containing protein       | -2.0 | 3.5E-07 | 5.7E-06 | -2.5 | 2.4E-09 | 2.0E-06 |
| AT5G51810 | GA20OX2   | gibberellin 20 oxidase 2                                             | -2.0 | 1.8E-03 | 7.9E-03 | -2.5 | 1.2E-04 | 3.7E-03 |
| AT5G44210 | ERF9      | erf domain protein 9                                                 | -2.0 | 1.3E-04 | 8.6E-04 | -2.0 | 1.2E-04 | 3.5E-03 |
| AT1G61260 | AT1G61260 | cotton fiber (DUF761)                                                | -2.0 | 3.8E-08 | 8.2E-07 | -2.3 | 1.4E-09 | 1.7E-06 |
| AT2G43535 | AT2G43535 | Scorpion toxin-like knottin superfamily protein                      | -2.0 | 1.6E-03 | 7.1E-03 | -2.0 | 1.5E-03 | 2.1E-02 |
| AT5G53830 | AT5G53830 | VQ motif-containing protein                                          | -2.0 | 8.0E-06 | 8.3E-05 | -2.4 | 1.7E-07 | 3.8E-05 |

| Col UV/WL Down and <i>pif45</i> /Col WL Up |           |                                                    | Col UV/WL    |         |                 | <i>pif45</i> /Col WL    |         |                 |
|--------------------------------------------|-----------|----------------------------------------------------|--------------|---------|-----------------|-------------------------|---------|-----------------|
| AGI                                        | gene      | description                                        | Col_UV/WL_FC | pvalue  | pvalue_with_FDR | <i>pif45</i> /Col_WL_FC | pvalue  | pvalue_with_FDR |
| AT2G18800                                  | XTH21     | xyloglucan endotransglucosylase/hydrolase 21       | -2.8         | 1.6E-04 | 1.6E-04         | 2.0                     | 2.3E-04 | 5.8E-03         |
| AT5G52050                                  | AT5G52050 | MATE efflux family protein                         | -2.2         | 2.0E-02 | 2.0E-02         | 2.3                     | 8.2E-04 | 1.4E-02         |
| AT1G66270                                  | BGLU21    | Glycosyl hydrolase superfamily protein             | -2.2         | 2.1E-02 | 2.1E-02         | 2.4                     | 1.6E-03 | 2.1E-02         |
| AT1G54000                                  | GLL22     | GDSL-like Lipase/Acylhydrolase superfamily protein | -2.1         | 3.5E-03 | 3.5E-03         | 2.0                     | 7.4E-04 | 1.3E-02         |

| <i>pif45</i> /Col WL Down |            |                                                                          | Col UV/WL    |         |                 | <i>pif45</i> /Col WL    |         |                 |
|---------------------------|------------|--------------------------------------------------------------------------|--------------|---------|-----------------|-------------------------|---------|-----------------|
| AGI                       | gene       | description                                                              | Col_UV/WL_FC | pvalue  | pvalue_with_FDR | <i>pif45</i> /Col_WL_FC | pvalue  | pvalue_with_FDR |
| AT3G01345                 | AT3G01345  | Expressed protein                                                        | 1.0          | 9.9E-01 | 1.0E+00         | -292.4                  | 1.2E-06 | 1.5E-04         |
| AT3G30720                 | QQS        | qua-quine starch                                                         | 1.1          | 8.6E-01 | 9.2E-01         | -52.1                   | 2.4E-05 | 1.2E-03         |
| AT3G59060                 | PIL6       | phytochrome interacting factor 3-like 6                                  | 1.1          | 6.2E-01 | 7.5E-01         | -21.6                   | 4.9E-16 | 1.1E-11         |
| AT3G29060                 | AT3G29060  | EXS (ERD1/XPR1/SYG1) family protein                                      | -2.0         | 6.8E-02 | 1.5E-01         | -17.2                   | 1.4E-05 | 8.5E-04         |
| AT5G04380                 | AT5G04380  | S-adenosyl-L-methionine-dependent methyltransferases superfamily protein | 1.3          | 6.0E-01 | 7.3E-01         | -14.6                   | 1.1E-03 | 1.7E-02         |
| AT3G09640                 | APX2       | ascorbate peroxidase 2                                                   | 1.5          | 3.3E-01 | 4.8E-01         | -12.1                   | 1.8E-03 | 2.3E-02         |
| AT5G57810                 | TET15      | tetraspanin15                                                            | 1.3          | 3.6E-01 | 5.1E-01         | -10.9                   | 2.7E-06 | 2.8E-04         |
| AT3G48960                 | AT3G48960  | Ribosomal protein L13e family protein                                    | -1.1         | 8.3E-01 | 9.0E-01         | -10.7                   | 8.0E-04 | 1.4E-02         |
| AT5G53870                 | ENODL1     | early nodulin-like protein 1                                             | -1.1         | 6.2E-01 | 7.4E-01         | -9.7                    | 1.4E-09 | 1.7E-06         |
| AT5G18050                 | SAUR22     | SAUR-like auxin-responsive protein family                                | -1.9         | 5.0E-02 | 1.2E-01         | -9.4                    | 6.5E-07 | 9.9E-05         |
| AT1G68800                 | TCP12      | TCP domain protein 12                                                    | -3.5         | 1.5E-05 | 1.4E-04         | -8.8                    | 9.2E-09 | 6.1E-06         |
| AT1G54040                 | ESP        | epithiospecifier protein                                                 | -1.0         | 9.4E-01 | 9.7E-01         | -8.6                    | 1.1E-05 | 7.5E-04         |
| AT1G29395                 | COR413/IM1 | COLD REGULATED 314 INNER MEMBRANE 1                                      | -2.1         | 5.3E-02 | 1.2E-01         | -8.1                    | 1.6E-05 | 9.5E-04         |
| AT5G35525                 | AT5G35525  | PLAC8 family protein                                                     | -2.5         | 6.1E-05 | 4.7E-04         | -7.8                    | 1.1E-10 | 3.1E-07         |
| AT4G01190                 | PIPK10     | phosphatidylinositol phosphate kinase 10                                 | -1.5         | 2.3E-01 | 3.7E-01         | -7.6                    | 1.5E-05 | 9.1E-04         |
| AT5G50750                 | RGP4       | reversibly glycosylated polypeptide 4                                    | -2.6         | 4.7E-02 | 1.1E-01         | -7.6                    | 9.1E-04 | 1.5E-02         |
| AT3G52310                 | ABCG27     | ABC transporter G family member 27                                       | 1.9          | 2.5E-02 | 6.8E-02         | -7.4                    | 8.0E-05 | 2.8E-03         |
| AT2G47880                 | AT2G47880  | Glutaredoxin family protein                                              | 1.5          | 3.5E-01 | 5.0E-01         | -7.3                    | 1.8E-03 | 2.4E-02         |
| AT1G19510                 | RL5        | RAD-like 5                                                               | 3.8          | 9.3E-05 | 6.7E-04         | -7.2                    | 1.5E-04 | 4.3E-03         |
| AT2G07687                 | AT2G07687  | Cytochrome c oxidase, subunit III                                        | -3.0         | 5.7E-02 | 1.3E-01         | -7.2                    | 4.7E-03 | 4.5E-02         |
| AT2G34655                 | AT2G34655  | hypothetical protein                                                     | -3.5         | 3.1E-02 | 8.0E-02         | -7.1                    | 3.8E-03 | 3.9E-02         |
| AT1G66100                 | AT1G66100  | Plant thionin                                                            | 4.4          | 2.5E-04 | 1.5E-03         | -6.7                    | 4.7E-05 | 1.9E-03         |
| AT1G73700                 | AT1G73700  | MATE efflux family protein                                               | 1.0          | 9.3E-01 | 9.6E-01         | -6.6                    | 4.1E-03 | 4.1E-02         |
| AT3G30120                 | AT3G30120  | pseudogene of mediator of RNA polymerase II transcription subunit        | -1.6         | 1.3E-01 | 2.4E-01         | -6.5                    | 1.9E-05 | 1.0E-03         |
| AT2G16140                 | AT2G16140  | transposable_element_gene                                                | 1.3          | 4.4E-01 | 5.9E-01         | -6.3                    | 2.7E-03 | 3.1E-02         |
| AT5G64590                 | AT5G64590  | NYN domain protein                                                       | -1.9         | 1.1E-01 | 2.2E-01         | -6.1                    | 8.8E-04 | 1.5E-02         |
| AT2G21140                 | PRP2       | proline-rich protein 2                                                   | -1.7         | 3.2E-03 | 1.3E-02         | -5.7                    | 8.1E-11 | 3.1E-07         |
| AT3G22235                 | AT3G22235  | cysteine-rich TM module stress tolerance protein                         | 3.2          | 2.6E-03 | 1.1E-02         | -5.7                    | 3.7E-03 | 3.8E-02         |
| AT3G60700                 | AT3G60700  | hypothetical protein (DUF1163)                                           | -2.7         | 6.3E-04 | 3.3E-03         | -5.6                    | 9.9E-07 | 1.4E-04         |
| AT5G44568                 | AT5G44568  | transmembrane protein                                                    | 4.4          | 2.1E-06 | 2.6E-05         | -5.5                    | 1.1E-04 | 3.3E-03         |
| AT5G64210                 | AOX2       | alternative oxidase 2                                                    | -1.6         | 2.7E-01 | 4.2E-01         | -5.3                    | 1.6E-03 | 2.2E-02         |
| AT4G19970                 | AT4G19970  | nucleotide-diphospho-sugar transferase family protein                    | -1.3         | 3.3E-01 | 4.8E-01         | -5.3                    | 4.9E-05 | 2.0E-03         |
| AT5G18060                 | SAUR23     | SAUR-like auxin-responsive protein family                                | -1.8         | 4.3E-02 | 1.0E-01         | -5.2                    | 4.4E-06 | 4.0E-04         |
| AT5G44130                 | FLA13      | FASCICLIN-like arabinogalactan protein 13                                | 1.5          | 2.1E-02 | 5.9E-02         | -5.0                    | 1.5E-09 | 1.7E-06         |
| AT1G34480                 | AT1G34480  | Cysteine/Histidine-rich C1 domain family protein                         | -1.6         | 2.8E-01 | 4.3E-01         | -5.0                    | 3.2E-03 | 3.5E-02         |
| AT4G32500                 | KT5        | K transporter 5                                                          | -1.7         | 1.8E-01 | 3.1E-01         | -4.9                    | 2.7E-03 | 3.2E-02         |
| AT2G36110                 | AT2G36110  | Polynucleotidyl transferase, ribonuclease H-like superfamily protein     | -1.7         | 8.8E-02 | 1.8E-01         | -4.9                    | 5.8E-05 | 2.2E-03         |
| AT5G18080                 | SAUR24     | SAUR-like auxin-responsive protein family                                | -2.0         | 1.9E-02 | 5.5E-02         | -4.7                    | 1.5E-05 | 8.9E-04         |
| AT1G78440                 | ATGA20X1   | gibberellin 2-beta-dioxygenase                                           | 2.5          | 1.4E-03 | 6.6E-03         | -4.7                    | 2.0E-04 | 5.2E-03         |
| AT2G18150                 | AT2G18150  | Peroxidase superfamily protein                                           | 1.2          | 3.0E-01 | 4.5E-01         | -4.6                    | 2.9E-08 | 1.3E-05         |
| AT1G18400                 | BEE1       | BR enhanced expression 1                                                 | -1.3         | 1.9E-01 | 3.2E-01         | -4.2                    | 3.0E-08 | 1.4E-05         |
| AT4G38825                 | AT4G38825  | SAUR-like auxin-responsive protein family                                | -1.7         | 1.6E-02 | 4.7E-02         | -4.1                    | 2.8E-07 | 5.4E-05         |
| AT5G18020                 | SAUR20     | SAUR-like auxin-responsive protein family                                | -1.0         | 9.2E-01 | 9.6E-01         | -4.1                    | 5.5E-07 | 9.1E-05         |
| AT4G22710                 | CYP706A2   | cytochrome P450, family 706, subfamily A, polypeptide 2                  | -1.8         | 1.2E-01 | 2.2E-01         | -4.1                    | 1.3E-03 | 1.8E-02         |

|           |           |                                                                                           |      |         |         |      |         |         |
|-----------|-----------|-------------------------------------------------------------------------------------------|------|---------|---------|------|---------|---------|
| AT5G17860 | CAX7      | calcium exchanger 7                                                                       | -1.7 | 1.5E-01 | 2.7E-01 | -4.0 | 7.6E-04 | 1.3E-02 |
| AT5G18030 | AT5G18030 | SAUR-like auxin-responsive protein family                                                 | -1.1 | 8.4E-01 | 9.0E-01 | -4.0 | 1.5E-05 | 9.2E-04 |
| AT5G05390 | LAC12     | laccase 12                                                                                | 4.2  | 4.4E-05 | 3.5E-04 | -4.0 | 1.7E-03 | 2.3E-02 |
| AT1G69540 | AGL94     | AGAMOUS-like 94                                                                           | -1.2 | 5.9E-01 | 7.2E-01 | -4.0 | 1.7E-04 | 4.6E-03 |
| AT1G73550 | AT1G73550 | Bifunctional inhibitor/lipid-transfer protein/seed storage 2S albumin superfamily protein | -1.7 | 1.1E-01 | 2.1E-01 | -3.9 | 5.2E-04 | 1.0E-02 |
| AT4G11170 | AT4G11170 | Disease resistance protein (TIR-NBS-LRR class)                                            | -1.3 | 3.3E-01 | 4.8E-01 | -3.9 | 4.4E-04 | 9.0E-03 |
| AT1G01390 | AT1G01390 | UDP-Glycosyltransferase superfamily protein                                               | -1.1 | 7.3E-01 | 8.2E-01 | -3.9 | 9.6E-06 | 6.7E-04 |
| AT5G49130 | AT5G49130 | MATE efflux family protein                                                                | -1.3 | 4.5E-01 | 6.0E-01 | -3.8 | 1.7E-03 | 2.2E-02 |
| AT3G28540 | AT3G28540 | P-loop containing nucleoside triphosphate hydrolases superfamily protein                  | 1.8  | 2.1E-03 | 9.2E-03 | -3.7 | 7.0E-07 | 1.1E-04 |
| AT1G18710 | MYB47     | myb domain protein 47                                                                     | 2.0  | 1.3E-03 | 6.2E-03 | -3.7 | 2.2E-05 | 1.2E-03 |
| AT4G04223 | AT4G04223 |                                                                                           | -1.1 | 8.5E-01 | 9.1E-01 | -3.7 | 2.1E-03 | 2.6E-02 |
| AT2G05950 | AT2G05950 | transposable_element_gene                                                                 | -1.6 | 1.7E-01 | 3.0E-01 | -3.6 | 2.9E-03 | 3.3E-02 |
| AT5G07000 | ST2B      | sulfotransferase 2B                                                                       | -1.6 | 3.5E-03 | 1.4E-02 | -3.6 | 2.1E-09 | 2.0E-06 |
| AT4G27580 | AT4G27580 | phosphatidylinositol transfer SFH5-like protein                                           | -1.9 | 1.1E-01 | 2.1E-01 | -3.6 | 5.2E-03 | 4.8E-02 |
| AT1G78970 | LUP1      | lupeol synthase 1                                                                         | -1.2 | 2.8E-01 | 4.2E-01 | -3.6 | 1.1E-09 | 1.5E-06 |
| AT3G48970 | AT3G48970 | Heavy metal transport/detoxification superfamily protein                                  | -1.2 | 3.1E-01 | 4.6E-01 | -3.6 | 9.5E-07 | 1.4E-04 |
| AT5G53980 | HB52      | homeobox protein 52                                                                       | -1.3 | 2.5E-01 | 4.0E-01 | -3.6 | 1.5E-06 | 1.9E-04 |
| AT5G03435 | AT5G03435 | Ca2 dependent plant phosphoribosyltransferase family protein                              | -1.5 | 2.1E-01 | 3.5E-01 | -3.5 | 1.9E-03 | 2.4E-02 |
| AT1G68725 | AGP19     | arabinogalactan protein 19                                                                | 1.0  | 8.2E-01 | 8.9E-01 | -3.4 | 8.3E-08 | 2.5E-05 |
| AT1G63380 | AT1G63380 | NAD(P)-binding Rossmann-fold superfamily protein                                          | -2.1 | 3.8E-02 | 9.4E-02 | -3.4 | 2.6E-03 | 3.0E-02 |
| AT3G17050 | AT3G17050 | transposable_element_gene                                                                 | -1.9 | 3.3E-04 | 1.9E-03 | -3.4 | 3.5E-08 | 1.4E-05 |
| AT1G68620 | AT1G68620 | alpha/beta-Hydrolases superfamily protein                                                 | 1.7  | 1.1E-02 | 3.6E-02 | -3.4 | 8.9E-06 | 6.4E-04 |
| AT4G10310 | HKT1      | high-affinity K transporter 1                                                             | -1.1 | 5.7E-01 | 7.0E-01 | -3.4 | 1.1E-06 | 1.5E-04 |
| AT5G17780 | AT5G17780 | alpha/beta-Hydrolases superfamily protein                                                 | 6.4  | 2.4E-14 | 3.3E-12 | -3.3 | 1.5E-07 | 3.5E-05 |
| AT4G38850 | SAUR15    | SAUR-like auxin-responsive protein family                                                 | -1.4 | 1.6E-01 | 2.8E-01 | -3.3 | 4.8E-05 | 1.9E-03 |
| AT3G28890 | RLP43     | receptor like protein 43                                                                  | 1.2  | 6.3E-01 | 7.5E-01 | -3.3 | 4.0E-03 | 4.1E-02 |
| AT2G07711 | AT2G07711 | pseudogene of NADH dehydrogenase 5B                                                       | -2.3 | 2.1E-02 | 5.9E-02 | -3.3 | 2.7E-03 | 3.1E-02 |
| AT2G46440 | CNGC11    | cyclic nucleotide-gated channels                                                          | 1.0  | 9.3E-01 | 9.6E-01 | -3.2 | 2.4E-03 | 2.8E-02 |
| AT1G68350 | AT1G68350 | cotton fiber protein                                                                      | -1.7 | 1.1E-02 | 3.4E-02 | -3.2 | 2.5E-06 | 2.7E-04 |
| AT1G18870 | ICS2      | isochorismate synthase 2                                                                  | -1.6 | 1.1E-02 | 3.6E-02 | -3.1 | 2.2E-07 | 4.6E-05 |
| AT5G39860 | PRE1      | basic helix-loop-helix (bHLH) DNA-binding family protein                                  | -1.9 | 4.2E-04 | 2.4E-03 | -3.1 | 1.4E-07 | 3.4E-05 |
| AT4G13810 | RLP47     | receptor like protein 47                                                                  | 4.8  | 1.2E-06 | 1.7E-05 | -3.1 | 3.2E-03 | 3.5E-02 |
| AT1G29460 | AT1G29460 | SAUR-like auxin-responsive protein family                                                 | -1.5 | 1.4E-01 | 2.6E-01 | -3.1 | 2.2E-04 | 5.5E-03 |
| AT5G33340 | CDR1      | Eukaryotic aspartyl protease family protein                                               | -1.5 | 2.4E-01 | 3.8E-01 | -3.1 | 4.8E-03 | 4.5E-02 |
| AT3G03840 | SAUR27    | SAUR-like auxin-responsive protein family                                                 | -1.7 | 2.1E-02 | 5.8E-02 | -3.1 | 4.6E-05 | 1.9E-03 |
| AT5G24770 | VSP2      | vegetative storage protein 2                                                              | 1.1  | 6.0E-01 | 7.3E-01 | -3.1 | 3.0E-04 | 6.9E-03 |
| AT3G03850 | SAUR26    | SAUR-like auxin-responsive protein family                                                 | -1.9 | 2.8E-03 | 1.2E-02 | -3.1 | 3.9E-06 | 3.6E-04 |
| AT1G16850 | AT1G16850 | transmembrane protein                                                                     | 1.5  | 8.0E-02 | 1.7E-01 | -3.1 | 1.2E-04 | 3.7E-03 |
| AT2G26695 | AT2G26695 | Ran BP2/NZF zinc finger-like superfamily protein                                          | -1.5 | 6.4E-02 | 1.4E-01 | -3.0 | 1.6E-05 | 9.3E-04 |
| AT5G10770 | AT5G10770 | Eukaryotic aspartyl protease family protein                                               | -1.1 | 5.8E-01 | 7.1E-01 | -3.0 | 3.1E-07 | 5.8E-05 |
| AT1G01600 | CYP86A4   | cytochrome P450, family 86, subfamily A, polypeptide 4                                    | -1.7 | 3.8E-03 | 1.5E-02 | -3.0 | 3.2E-07 | 5.9E-05 |
| AT5G03090 | AT5G03090 | Mto 1 responding down protein                                                             | 1.3  | 2.8E-01 | 4.3E-01 | -3.0 | 1.5E-03 | 2.1E-02 |
| AT1G49900 | AT1G49900 | C2H2 type zinc finger transcription factor family                                         | -1.2 | 5.1E-01 | 6.5E-01 | -3.0 | 9.3E-04 | 1.5E-02 |
| AT4G14560 | IAA1      | indole-3-acetic acid inducible                                                            | -1.4 | 1.2E-01 | 2.3E-01 | -3.0 | 7.1E-06 | 5.5E-04 |
| AT3G55940 | AT3G55940 | Phosphoinositide-specific phospholipase C family protein                                  | -1.6 | 1.1E-02 | 3.4E-02 | -3.0 | 1.4E-06 | 1.8E-04 |
| AT1G29500 | AT1G29500 | SAUR-like auxin-responsive protein family                                                 | -1.1 | 5.5E-01 | 6.8E-01 | -2.9 | 1.3E-05 | 8.4E-04 |
| AT3G51895 | SULTR3    |                                                                                           | 1.3  | 3.3E-01 | 4.8E-01 | -2.9 | 1.6E-03 | 2.2E-02 |
| AT5G46240 | KAT1      |                                                                                           | -1.5 | 1.0E-02 | 3.3E-02 | -2.9 | 3.1E-08 | 1.4E-05 |
| AT3G25717 | RTFL16    | ROTUNDIFOLIA like 16                                                                      | -1.8 | 7.4E-03 | 2.5E-02 | -2.9 | 1.2E-05 | 7.7E-04 |
| AT2G29120 | GLR2.7    | glutamate receptor 2.7                                                                    | -1.2 | 1.7E-01 | 3.0E-01 | -2.9 | 6.0E-07 | 9.7E-05 |
| AT3G16470 | JR1       | Mannose-binding lectin superfamily protein                                                | 1.0  | 8.6E-01 | 9.2E-01 | -2.9 | 1.1E-07 | 2.9E-05 |
| AT1G02340 | HFR1      | basic helix-loop-helix (bHLH) DNA-binding superfamily protein                             | 1.2  | 2.6E-01 | 4.1E-01 | -2.9 | 1.2E-06 | 1.6E-04 |
| AT1G29450 | AT1G29450 | SAUR-like auxin-responsive protein family                                                 | -1.3 | 2.3E-01 | 3.8E-01 | -2.8 | 1.9E-04 | 5.0E-03 |
| AT2G29370 | AT2G29370 | NAD(P)-binding Rossmann-fold superfamily protein                                          | 2.3  | 4.2E-04 | 2.4E-03 | -2.8 | 7.8E-04 | 1.3E-02 |
| AT4G37980 | ELI3-1    | cinnamyl alcohol dehydrogenase 7                                                          | 1.3  | 1.8E-01 | 3.1E-01 | -2.8 | 9.1E-06 | 6.5E-04 |
| AT1G03445 | BSU1      | Serine/threonine protein phosphatase family                                               | 2.0  | 1.5E-03 | 7.0E-03 | -2.8 | 1.4E-04 | 4.1E-03 |
| AT1G43590 | AT1G43590 | transposable_element_gene                                                                 | -1.4 | 1.5E-01 | 2.7E-01 | -2.8 | 1.7E-04 | 4.6E-03 |
| AT5G67180 | TOE3      | target of early activation tagged (EAT) 3                                                 | -1.1 | 7.8E-01 | 8.6E-01 | -2.8 | 9.1E-04 | 1.5E-02 |
| AT3G59900 | ARGOS     | auxin-regulated gene involved in organ size                                               | 1.1  | 4.9E-01 | 6.3E-01 | -2.8 | 9.6E-06 | 6.7E-04 |
| AT3G55240 | AT3G55240 | Plant protein 1589 of unknown function                                                    | -1.8 | 1.6E-03 | 7.1E-03 | -2.8 | 1.6E-06 | 2.0E-04 |
| AT1G05700 | AT1G05700 | Leucine-rich repeat transmembrane protein kinase protein                                  | -1.8 | 4.5E-02 | 1.1E-01 | -2.8 | 1.3E-03 | 1.9E-02 |
| AT1G30280 | AT1G30280 | Chaperone DnaJ-domain superfamily protein                                                 | -1.3 | 7.5E-02 | 1.6E-01 | -2.7 | 3.5E-08 | 1.4E-05 |
| AT4G39700 | AT4G39700 | Heavy metal transport/detoxification superfamily protein                                  | -1.4 | 1.2E-01 | 2.2E-01 | -2.7 | 2.6E-04 | 6.3E-03 |
| AT3G15356 | AT3G15356 | Legume lectin family protein                                                              | -1.2 | 1.4E-01 | 2.5E-01 | -2.7 | 1.2E-07 | 3.1E-05 |
| AT4G16892 | AT4G16892 |                                                                                           | -1.5 | 2.9E-02 | 7.5E-02 | -2.7 | 2.7E-06 | 2.8E-04 |
| AT1G72140 | AT1G72140 | Major facilitator superfamily protein                                                     | -1.1 | 4.8E-01 | 6.2E-01 | -2.7 | 1.2E-05 | 7.8E-04 |
| AT2G33205 | AT2G33205 | Serinc-domain containing serine and sphingolipid biosynthesis protein                     | -1.7 | 3.5E-02 | 8.8E-02 | -2.7 | 3.4E-04 | 7.5E-03 |
| AT1G76240 | AT1G76240 | DUF241 domain protein (DUF241)                                                            | -1.3 | 1.7E-01 | 2.9E-01 | -2.6 | 1.6E-06 | 1.9E-04 |
| AT3G29575 | AFP3      | ABI five binding protein 3                                                                | -1.8 | 3.2E-03 | 1.3E-02 | -2.6 | 1.7E-05 | 9.9E-04 |
| AT2G47010 | AT2G47010 | calcium/calcium/calmodulin-dependent Serine/Threonine-kinase                              | 1.3  | 6.1E-02 | 1.3E-01 | -2.6 | 2.8E-08 | 1.3E-05 |
| AT3G42658 | SADHU3-2  | transposable_element_gene                                                                 | -1.6 | 1.8E-02 | 5.2E-02 | -2.6 | 4.4E-05 | 1.8E-03 |



|           |                   |                                                                                                   |      |         |         |      |         |         |
|-----------|-------------------|---------------------------------------------------------------------------------------------------|------|---------|---------|------|---------|---------|
| AT4G13280 | <i>TPS12</i>      | terpenoid synthase 12                                                                             | -1.0 | 9.7E-01 | 9.9E-01 | -2.6 | 8.3E-05 | 2.8E-03 |
| AT2G05518 | <i>AT2G05518</i>  |                                                                                                   | -1.8 | 1.5E-02 | 4.6E-02 | -2.6 | 2.9E-04 | 6.7E-03 |
| AT1G29510 | <i>SAUR68</i>     | SAUR-like auxin-responsive protein family                                                         | -1.0 | 9.3E-01 | 9.6E-01 | -2.6 | 1.4E-05 | 8.5E-04 |
| AT3G23030 | <i>IAA2</i>       | indole-3-acetic acid inducible 2                                                                  | -1.2 | 1.4E-01 | 2.6E-01 | -2.5 | 3.4E-08 | 1.4E-05 |
| AT3G13980 | <i>AT3G13980</i>  | SKI/DACH domain protein                                                                           | -2.0 | 3.5E-04 | 2.0E-03 | -2.5 | 4.8E-06 | 4.2E-04 |
| AT2G32990 | <i>GH9B8</i>      | glycosyl hydrolase 9B8                                                                            | 1.8  | 2.9E-03 | 1.2E-02 | -2.5 | 3.3E-05 | 1.5E-03 |
| AT5G01740 | <i>AT5G01740</i>  | Nuclear transport factor 2 (NTF2) family protein                                                  | 1.0  | 9.0E-01 | 9.4E-01 | -2.5 | 4.3E-05 | 1.8E-03 |
| AT4G14640 | <i>CAM8</i>       | calmodulin 8                                                                                      | -2.0 | 8.9E-04 | 4.4E-03 | -2.5 | 3.2E-05 | 1.5E-03 |
| AT1G27670 | <i>AT1G27670</i>  | transmembrane protein                                                                             | -1.8 | 1.3E-03 | 6.1E-03 | -2.5 | 7.8E-06 | 5.9E-04 |
| AT5G66390 | <i>AT5G66390</i>  | Peroxidase superfamily protein                                                                    | 1.2  | 2.1E-01 | 3.5E-01 | -2.5 | 4.5E-08 | 1.6E-05 |
| AT5G27660 | <i>DEG14</i>      | Trypsin family protein with PDZ domain-containing protein                                         | 1.1  | 5.2E-01 | 6.6E-01 | -2.5 | 5.7E-06 | 4.7E-04 |
| AT3G49820 | <i>AT3G49820</i>  | hypothetical protein                                                                              | -1.4 | 1.5E-01 | 2.7E-01 | -2.5 | 1.6E-03 | 2.1E-02 |
| AT1G29440 | <i>SAUR63</i>     | SAUR-like auxin-responsive protein family                                                         | 1.2  | 3.0E-01 | 4.5E-01 | -2.5 | 7.3E-05 | 2.6E-03 |
| AT5G64770 | <i>RGF9</i>       | root meristem growth factor                                                                       | 1.9  | 6.1E-05 | 4.7E-04 | -2.4 | 6.7E-07 | 1.0E-04 |
| AT2G36590 | <i>ProT3</i>      | proline transporter 3                                                                             | 3.4  | 9.9E-10 | 3.6E-08 | -2.4 | 5.8E-06 | 4.8E-04 |
| AT2G38530 | <i>LTP2</i>       | lipid transfer protein 2                                                                          | -1.5 | 1.3E-01 | 2.5E-01 | -2.4 | 3.0E-03 | 3.4E-02 |
| AT5G01790 | <i>AT5G01790</i>  | hypothetical protein                                                                              | 1.8  | 1.6E-04 | 1.0E-03 | -2.4 | 5.6E-07 | 9.1E-05 |
| AT5G55780 | <i>AT5G55780</i>  | Cysteine/Histidine-rich C1 domain family protein                                                  | -3.6 | 1.5E-05 | 1.4E-04 | -2.4 | 5.7E-04 | 1.1E-02 |
| AT5G57760 | <i>AT5G57760</i>  | hypothetical protein                                                                              | -1.6 | 9.8E-03 | 3.2E-02 | -2.4 | 3.3E-05 | 1.5E-03 |
| AT4G14140 | <i>DMT2</i>       | DNA methyltransferase 2                                                                           | -2.0 | 1.7E-02 | 5.0E-02 | -2.4 | 3.0E-03 | 3.3E-02 |
| AT2G40610 | <i>EXPA8</i>      | expansin A8                                                                                       | -1.9 | 5.5E-04 | 3.0E-03 | -2.4 | 6.5E-06 | 5.2E-04 |
| AT1G20450 | <i>ERD10</i>      | Dehydrin family protein                                                                           | 1.5  | 3.0E-03 | 1.2E-02 | -2.4 | 1.8E-08 | 1.0E-05 |
| AT5G23350 | <i>AT5G23350</i>  | GRAM domain protein/ABA-responsive-like protein                                                   | -1.3 | 5.6E-02 | 1.3E-01 | -2.4 | 3.0E-07 | 5.6E-05 |
| AT4G12730 | <i>FLA2</i>       | FASCICLIN-like arabinogalactan 2                                                                  | -1.4 | 1.4E-02 | 4.1E-02 | -2.4 | 5.0E-08 | 1.8E-05 |
| AT5G46590 | <i>NAC096</i>     | NAC domain containing protein 96                                                                  | 1.1  | 7.3E-01 | 8.3E-01 | -2.4 | 2.3E-04 | 5.8E-03 |
| AT4G08040 | <i>ACS11</i>      | 1-aminocyclopropane-1-carboxylate synthase 11                                                     | -1.9 | 8.4E-03 | 2.8E-02 | -2.4 | 7.3E-04 | 1.3E-02 |
| AT5G66580 | <i>AT5G66580</i>  | hypothetical protein                                                                              | -1.4 | 7.3E-02 | 1.6E-01 | -2.4 | 8.6E-05 | 2.9E-03 |
| AT5G10970 | <i>AT5G10970</i>  | C2H2 and C2HC zinc fingers superfamily protein                                                    | -1.5 | 4.1E-02 | 9.9E-02 | -2.4 | 1.4E-04 | 4.1E-03 |
| AT4G12470 | <i>AZ11</i>       | azelaic acid induced 1                                                                            | 1.2  | 2.9E-01 | 4.4E-01 | -2.4 | 2.4E-04 | 6.0E-03 |
| AT1G15050 | <i>IAA34</i>      | indole-3-acetic acid inducible 34                                                                 | -1.5 | 1.5E-01 | 2.7E-01 | -2.3 | 2.6E-03 | 3.0E-02 |
| AT2G25625 | <i>AT2G25625</i>  | histone deacetylase-like protein                                                                  | 1.5  | 1.4E-02 | 4.3E-02 | -2.3 | 1.5E-05 | 9.2E-04 |
| AT5G38005 | <i>AT5G38005</i>  |                                                                                                   | -1.2 | 3.4E-01 | 4.9E-01 | -2.3 | 6.3E-04 | 1.2E-02 |
| AT5G51200 | <i>EMB3142</i>    | nuclear pore complex protein (DUF3414)                                                            | -1.8 | 1.3E-03 | 6.1E-03 | -2.3 | 2.7E-05 | 1.3E-03 |
| AT5G66590 | <i>AT5G66590</i>  | CAP (Cysteine-rich secretory proteins, Antigen 5, and Pathogenesis-related 1 protein) superfamily | -1.9 | 1.7E-03 | 7.5E-03 | -2.3 | 1.2E-04 | 3.7E-03 |
| AT4G14380 | <i>AT4G14380</i>  | cotton fiber protein                                                                              | -1.6 | 1.0E-02 | 3.3E-02 | -2.3 | 3.5E-05 | 1.6E-03 |
| AT5G39610 | <i>NAC6</i>       | NAC domain containing protein 6                                                                   | -1.1 | 6.4E-01 | 7.6E-01 | -2.3 | 2.2E-05 | 1.2E-03 |
| AT2G18969 | <i>AT2G18969</i>  | transcription factor/transcription regulator                                                      | -1.5 | 1.9E-02 | 5.5E-02 | -2.3 | 2.1E-05 | 1.1E-03 |
| AT3G55230 | <i>AT3G55230</i>  | Disease resistance-responsive (dirigent-like protein) family protein                              | -1.1 | 5.5E-01 | 6.9E-01 | -2.3 | 3.7E-06 | 3.4E-04 |
| AT2G43060 | <i>IBH1</i>       | ILI1 binding bHLH 1                                                                               | -1.4 | 5.3E-02 | 1.2E-01 | -2.3 | 2.0E-05 | 1.1E-03 |
| AT1G62560 | <i>FMO GS-OX3</i> | flavin-monooxygenase glucosinolate S-oxygenase 3                                                  | 2.3  | 6.3E-04 | 3.3E-03 | -2.3 | 2.9E-03 | 3.2E-02 |
| AT1G60030 | <i>NAT7</i>       | nucleobase-ascorbate transporter 7                                                                | -1.2 | 2.5E-01 | 4.0E-01 | -2.3 | 1.1E-05 | 7.5E-04 |
| AT1G78815 | <i>LSH7</i>       | LIGHT-DEPENDENT SHORT HYPOCOTYLS-like protein (DUF640)                                            | -1.7 | 6.2E-02 | 1.4E-01 | -2.3 | 5.0E-03 | 4.7E-02 |
| AT5G51790 | <i>AT5G51790</i>  | basic helix-loop-helix (bHLH) DNA-binding superfamily protein                                     | -2.8 | 2.0E-07 | 3.4E-06 | -2.3 | 6.4E-06 | 5.1E-04 |
| AT2G39450 | <i>MTP11</i>      | Cation efflux family protein                                                                      | 1.3  | 2.5E-01 | 3.9E-01 | -2.3 | 3.2E-04 | 7.2E-03 |
| AT2G27370 | <i>CASP3</i>      | Uncharacterized protein family (UPF0497)                                                          | -1.1 | 5.0E-01 | 6.4E-01 | -2.3 | 2.6E-07 | 5.1E-05 |
| AT5G38020 | <i>AT5G38020</i>  | S-adenosyl-L-methionine-dependent methyltransferases superfamily protein                          | -1.1 | 7.0E-01 | 8.1E-01 | -2.3 | 2.0E-03 | 2.5E-02 |
| AT1G09480 | <i>AT1G09480</i>  | NAD(P)-binding Rossmann-fold superfamily protein                                                  | -1.2 | 3.2E-01 | 4.7E-01 | -2.2 | 1.2E-04 | 3.7E-03 |
| AT1G75500 | <i>WAT1</i>       | Walls Are Thin 1                                                                                  | -1.7 | 1.6E-06 | 2.1E-05 | -2.2 | 3.5E-10 | 6.8E-07 |
| AT5G65980 | <i>AT5G65980</i>  | Auxin efflux carrier family protein                                                               | -1.1 | 7.3E-01 | 8.3E-01 | -2.2 | 3.4E-03 | 3.6E-02 |
| AT1G02670 | <i>AT1G02670</i>  | P-loop containing nucleoside triphosphate hydrolases superfamily protein                          | -1.6 | 4.8E-03 | 1.8E-02 | -2.2 | 1.6E-05 | 9.2E-04 |
| AT5G55730 | <i>FLA1</i>       | FASCICLIN-like arabinogalactan 1                                                                  | -2.0 | 6.2E-07 | 9.3E-06 | -2.2 | 2.8E-08 | 1.3E-05 |
| AT1G17400 | <i>AT1G17400</i>  | hypothetical protein                                                                              | 1.3  | 2.6E-01 | 4.1E-01 | -2.2 | 1.3E-03 | 1.9E-02 |
| AT3G11550 | <i>CASP2</i>      | Uncharacterized protein family (UPF0497)                                                          | -1.1 | 3.6E-01 | 5.1E-01 | -2.2 | 1.1E-07 | 3.0E-05 |
| AT3G03240 | <i>AT3G03240</i>  | alpha/beta-Hydrolases superfamily protein                                                         | -1.7 | 4.3E-02 | 1.0E-01 | -2.2 | 3.7E-03 | 3.8E-02 |
| AT1G01120 | <i>KCS1</i>       | 3-ketoacyl-CoA synthase 1                                                                         | 1.0  | 9.2E-01 | 9.5E-01 | -2.2 | 6.2E-07 | 9.8E-05 |
| AT5G47220 | <i>ERF2</i>       | ethylene responsive element binding factor 2                                                      | -1.8 | 3.3E-02 | 8.4E-02 | -2.2 | 4.2E-03 | 4.2E-02 |
| AT2G43290 | <i>MSS3</i>       | Calcium-binding EF-hand family protein                                                            | -1.7 | 1.3E-04 | 9.1E-04 | -2.2 | 2.2E-07 | 4.6E-05 |
| AT5G17700 | <i>AT5G17700</i>  | MATE efflux family protein                                                                        | 2.7  | 5.6E-06 | 6.2E-05 | -2.2 | 1.8E-04 | 4.8E-03 |
| AT3G08660 | <i>AT3G08660</i>  | Phototropic-responsive NPH3 family protein                                                        | -1.1 | 6.4E-01 | 7.6E-01 | -2.2 | 2.9E-06 | 2.9E-04 |
| AT1G69570 | <i>AT1G69570</i>  | Dof-type zinc finger DNA-binding family protein                                                   | -1.6 | 4.1E-02 | 1.0E-01 | -2.2 | 1.9E-03 | 2.5E-02 |
| AT5G67090 | <i>AT5G67090</i>  | Subtilisin-like serine endopeptidase family protein                                               | -1.2 | 2.8E-01 | 4.3E-01 | -2.2 | 2.0E-06 | 2.3E-04 |
| AT1G09310 | <i>AT1G09310</i>  | plant/protein (Protein of unknown function,                                                       | 1.2  | 3.8E-01 | 5.3E-01 | -2.2 | 5.0E-05 | 2.0E-03 |
| AT1G05835 | <i>AT1G05835</i>  | PHD finger protein                                                                                | -1.7 | 1.2E-02 | 3.8E-02 | -2.2 | 4.4E-04 | 9.1E-03 |
| AT1G36940 | <i>AT1G36940</i>  | myotubularin-like protein                                                                         | -1.7 | 4.9E-04 | 2.7E-03 | -2.2 | 4.5E-06 | 4.0E-04 |
| AT1G01200 | <i>RABA3</i>      | RAB GTPase homolog A3                                                                             | -1.6 | 6.0E-03 | 2.2E-02 | -2.2 | 4.3E-05 | 1.8E-03 |
| AT1G12070 | <i>AT1G12070</i>  | Immunoglobulin E-set superfamily protein                                                          | 1.3  | 1.3E-01 | 2.4E-01 | -2.2 | 2.4E-05 | 1.2E-03 |
| AT5G04310 | <i>AT5G04310</i>  | Pectin lyase-like superfamily protein                                                             | -1.8 | 5.0E-06 | 5.6E-05 | -2.2 | 2.2E-08 | 1.2E-05 |
| AT5G20740 | <i>AT5G20740</i>  | Plant invertase/pectin methylesterase inhibitor superfamily protein                               | -1.6 | 9.2E-03 | 3.0E-02 | -2.2 | 1.2E-04 | 3.6E-03 |
| AT3G23450 | <i>AT3G23450</i>  | transmembrane protein                                                                             | -1.6 | 3.4E-03 | 1.4E-02 | -2.2 | 5.2E-06 | 4.5E-04 |
| AT5G65800 | <i>ACS5</i>       | ACC synthase 5                                                                                    | -8.5 | 2.9E-08 | 6.6E-07 | -2.2 | 4.2E-03 | 4.2E-02 |
| AT5G01760 | <i>AT5G01760</i>  | ENTH/VHS/GAT family protein                                                                       | 1.1  | 6.6E-01 | 7.7E-01 | -2.2 | 6.8E-04 | 1.2E-02 |
| AT1G71740 | <i>AT1G71740</i>  | nucleolar protein                                                                                 | 1.1  | 3.2E-01 | 4.7E-01 | -2.2 | 2.8E-06 | 2.9E-04 |
| AT4G13580 | <i>AT4G13580</i>  | Disease resistance-responsive (dirigent-like protein) family protein                              | -1.1 | 7.0E-01 | 8.1E-01 | -2.1 | 7.8E-05 | 2.8E-03 |

|           |                  |                                                                          |      |         |         |      |         |         |
|-----------|------------------|--------------------------------------------------------------------------|------|---------|---------|------|---------|---------|
| AT2G28670 | <i>ESB1</i>      | Disease resistance-responsive (dirigent-like protein) family protein     | -1.1 | 3.0E-01 | 4.5E-01 | -2.1 | 1.2E-06 | 1.5E-04 |
| AT1G29430 | <i>AT1G29430</i> | SAUR-like auxin-responsive protein family                                | 1.5  | 7.1E-03 | 2.5E-02 | -2.1 | 3.0E-05 | 1.4E-03 |
| AT4G29110 | <i>AT4G29110</i> | cotton fiber protein                                                     | 2.4  | 2.7E-05 | 2.4E-04 | -2.1 | 6.3E-04 | 1.2E-02 |
| AT4G13290 | <i>CYP71A19</i>  | cytochrome P450, family 71, subfamily A, polypeptide 19                  | 1.2  | 1.1E-01 | 2.2E-01 | -2.1 | 7.0E-06 | 5.4E-04 |
| AT3G03820 | <i>SAUR29</i>    | SAUR-like auxin-responsive protein family                                | -1.4 | 8.0E-02 | 1.7E-01 | -2.1 | 9.3E-04 | 1.5E-02 |
| AT2G17880 | <i>AT2G17880</i> | Chaperone DnaJ-domain superfamily protein                                | 1.0  | 8.1E-01 | 8.9E-01 | -2.1 | 1.9E-06 | 2.2E-04 |
| AT4G18290 | <i>KAT2</i>      | potassium channel KAT1-like protein                                      | -1.2 | 1.2E-01 | 2.4E-01 | -2.1 | 9.2E-06 | 6.5E-04 |
| AT3G08570 | <i>AT3G08570</i> | Phototropic-responsive NPH3 family protein                               | -1.7 | 1.5E-03 | 6.8E-03 | -2.1 | 4.0E-05 | 1.7E-03 |
| AT4G28900 | <i>AT4G28900</i> | transposable_element_gene                                                | -1.9 | 1.6E-04 | 1.0E-03 | -2.1 | 2.5E-05 | 1.2E-03 |
| AT5G49630 | <i>AAP6</i>      | amino acid permease 6                                                    | -1.7 | 1.5E-03 | 6.8E-03 | -2.1 | 2.8E-05 | 1.3E-03 |
| AT4G23670 | <i>AT4G23670</i> | Polyketide cyclase/dehydrase and lipid transport superfamily protein     | 1.1  | 6.2E-01 | 7.5E-01 | -2.1 | 2.1E-05 | 1.1E-03 |
| AT5G02190 | <i>PCS1</i>      | Eukaryotic aspartyl protease family protein                              | -1.9 | 8.0E-03 | 2.7E-02 | -2.1 | 3.4E-03 | 3.6E-02 |
| AT1G54200 | <i>AT1G54200</i> | DNA mismatch repair Msh6-like protein                                    | -1.6 | 2.0E-04 | 1.2E-03 | -2.1 | 7.4E-08 | 2.4E-05 |
| AT1G61255 | <i>AT1G61255</i> | hypothetical protein                                                     | -1.4 | 1.4E-01 | 2.6E-01 | -2.1 | 1.8E-03 | 2.4E-02 |
| AT2G37030 | <i>AT2G37030</i> | SAUR-like auxin-responsive protein family                                | 1.7  | 2.7E-02 | 7.1E-02 | -2.1 | 5.2E-03 | 4.8E-02 |
| AT4G37410 | <i>CYP81F4</i>   | cytochrome P450, family 81, subfamily F, polypeptide 4                   | 1.1  | 7.0E-01 | 8.1E-01 | -2.1 | 3.1E-05 | 1.5E-03 |
| AT1G01130 | <i>AT1G01130</i> | CBL-interacting Serine/Threonine-kinase                                  | -1.3 | 2.6E-01 | 4.1E-01 | -2.1 | 1.9E-03 | 2.5E-02 |
| AT5G43660 | <i>AT5G43660</i> | 2-oxoglutarate (2OG) and Fe(II)-dependent oxygenase superfamily protein  | -1.2 | 3.4E-01 | 4.9E-01 | -2.1 | 3.8E-04 | 8.1E-03 |
| AT1G27030 | <i>AT1G27030</i> | hypothetical protein                                                     | -1.5 | 4.3E-03 | 1.6E-02 | -2.1 | 3.1E-06 | 3.0E-04 |
| AT5G64870 | <i>AT5G64870</i> | SPFH/Band 7/PHB domain-containing membrane-associated protein family     | -2.0 | 1.3E-03 | 6.1E-03 | -2.1 | 6.2E-04 | 1.2E-02 |
| AT1G69840 | <i>AT1G69840</i> | SPFH/Band 7/PHB domain-containing membrane-associated protein family     | -1.7 | 2.4E-04 | 1.5E-03 | -2.1 | 2.2E-06 | 2.5E-04 |
| AT1G78490 | <i>CYP708A3</i>  | cytochrome P450, family 708, subfamily A, polypeptide 3                  | -1.7 | 4.6E-04 | 2.5E-03 | -2.1 | 3.9E-06 | 3.6E-04 |
| AT4G24265 | <i>AT4G24265</i> | homeobox protein                                                         | -2.0 | 2.9E-04 | 1.7E-03 | -2.1 | 2.3E-04 | 5.8E-03 |
| AT4G38770 | <i>PRP4</i>      | proline-rich protein 4                                                   | -1.1 | 4.2E-01 | 5.7E-01 | -2.1 | 1.2E-04 | 3.5E-03 |
| AT4G20820 | <i>AT4G20820</i> | FAD-binding Berberine family protein                                     | 1.5  | 1.0E-02 | 3.3E-02 | -2.1 | 3.3E-05 | 1.5E-03 |
| AT2G21100 | <i>AT2G21100</i> | Disease resistance-responsive (dirigent-like protein) family protein     | 1.6  | 9.7E-03 | 3.2E-02 | -2.1 | 2.8E-04 | 6.6E-03 |
| AT1G77400 | <i>AT1G77400</i> | extensin-like protein                                                    | 1.1  | 6.5E-01 | 7.7E-01 | -2.1 | 3.5E-04 | 7.7E-03 |
| AT4G32350 | <i>AT4G32350</i> | Regulator of Vps4 activity in the MVB pathway protein                    | -1.3 | 5.8E-03 | 2.1E-02 | -2.0 | 1.0E-10 | 3.1E-07 |
| AT4G22690 | <i>CYP706A1</i>  | cytochrome P450, family 706, subfamily A, polypeptide 1                  | -1.1 | 7.1E-01 | 8.2E-01 | -2.0 | 2.5E-04 | 6.1E-03 |
| AT1G69490 | <i>NAP</i>       | NAC-like, activated by AP3/PI                                            | -1.1 | 7.9E-01 | 8.7E-01 | -2.0 | 2.7E-03 | 3.1E-02 |
| AT5G63450 | <i>CYP94B1</i>   | cytochrome P450, family 94, subfamily B, polypeptide 1                   | 1.3  | 6.2E-02 | 1.4E-01 | -2.0 | 4.9E-05 | 2.0E-03 |
| AT5G44670 | <i>GALS2</i>     | glycosyltransferase family protein (DUF23)                               | -1.7 | 1.3E-05 | 1.2E-04 | -2.0 | 2.7E-08 | 1.3E-05 |
| AT1G30750 | <i>AT1G30750</i> | TPRXL                                                                    | 1.0  | 9.1E-01 | 9.5E-01 | -2.0 | 9.9E-05 | 3.2E-03 |
| AT5G15290 | <i>CASP5</i>     | Uncharacterized protein family (UPF0497)                                 | -1.4 | 5.8E-02 | 1.3E-01 | -2.0 | 2.5E-04 | 6.1E-03 |
| AT1G04240 | <i>SHY2</i>      | AUX/IAA transcriptional regulator family protein                         | -1.9 | 2.8E-04 | 1.7E-03 | -2.0 | 8.5E-05 | 2.9E-03 |
| AT5G15900 | <i>TBL19</i>     | TRICHOME BIREFRINGENCE-LIKE 19                                           | 2.0  | 3.3E-04 | 1.9E-03 | -2.0 | 6.2E-04 | 1.2E-02 |
| AT1G64390 | <i>GH9C2</i>     | glycosyl hydrolase 9C2                                                   | -1.3 | 7.8E-02 | 1.6E-01 | -2.0 | 3.2E-06 | 3.1E-04 |
| AT3G04360 | <i>AT3G04360</i> | Calcium-dependent lipid-binding (CaLB domain) family protein             | -2.0 | 4.4E-03 | 1.7E-02 | -2.0 | 2.7E-03 | 3.1E-02 |
| AT4G39800 | <i>MIPS1</i>     | myo-inositol-1-phosphate synthase 1                                      | -1.4 | 2.6E-02 | 6.9E-02 | -2.0 | 6.8E-06 | 5.4E-04 |
| AT1G52290 | <i>PERK15</i>    | Protein kinase superfamily protein                                       | 1.6  | 1.0E-05 | 1.0E-04 | -2.0 | 4.3E-08 | 1.6E-05 |
| AT3G50570 | <i>AT3G50570</i> | hydroxyproline-rich glycoprotein family protein                          | 1.4  | 3.9E-02 | 9.6E-02 | -2.0 | 1.3E-04 | 3.9E-03 |
| AT2G06850 | <i>XTH4</i>      | xyloglucan endotransglucosylase/hydrolase 4                              | -1.6 | 1.8E-03 | 8.1E-03 | -2.0 | 3.6E-05 | 1.6E-03 |
| AT4G09890 | <i>AT4G09890</i> | mediator of RNA polymerase II transcription subunit, putative (DUF3511)  | -1.6 | 1.3E-03 | 6.1E-03 | -2.0 | 4.7E-06 | 4.2E-04 |
| AT2G12462 | <i>AT2G12462</i> | sterile alpha motif (SAM) domain protein                                 | -1.3 | 1.6E-02 | 4.8E-02 | -2.0 | 1.0E-07 | 2.8E-05 |
| AT2G34490 | <i>CYP710A2</i>  | cytochrome P450, family 710, subfamily A, polypeptide 2                  | -1.2 | 4.4E-01 | 5.9E-01 | -2.0 | 6.3E-04 | 1.2E-02 |
| AT1G33170 | <i>AT1G33170</i> | S-adenosyl-L-methionine-dependent methyltransferases superfamily protein | 1.4  | 5.6E-02 | 1.3E-01 | -2.0 | 1.2E-03 | 1.7E-02 |
| AT1G64660 | <i>MGL</i>       | methionine gamma-lyase                                                   | -1.9 | 9.5E-04 | 4.7E-03 | -2.0 | 3.1E-04 | 7.1E-03 |
| AT1G72230 | <i>AT1G72230</i> | Cupredoxin superfamily protein                                           | -1.3 | 4.6E-02 | 1.1E-01 | -2.0 | 4.9E-07 | 8.2E-05 |
| AT4G34710 | <i>ADC2</i>      | arginine decarboxylase 2                                                 | -1.3 | 9.0E-02 | 1.8E-01 | -2.0 | 2.2E-05 | 1.1E-03 |
| AT5G04370 | <i>NAMT1</i>     | S-adenosyl-L-methionine-dependent methyltransferases superfamily protein | -1.5 | 2.7E-02 | 7.1E-02 | -2.0 | 3.8E-04 | 8.1E-03 |

| <i>pif45</i> /Col WL Up |                  |                                                                          | Col UV/WL    |         |                 | <i>pif45</i> /Col WL    |         |                 |
|-------------------------|------------------|--------------------------------------------------------------------------|--------------|---------|-----------------|-------------------------|---------|-----------------|
| AGI                     | gene             | description                                                              | Col_UV/WL_FC | pvalue  | pvalue_with_FDR | <i>pif45</i> /Col_WL_FC | pvalue  | pvalue_with_FDR |
| AT5G10760               | <i>AT5G10760</i> | Eukaryotic aspartyl protease family protein                              | 33.9         | 5.2E-03 | 1.9E-02         | 51.2                    | 8.9E-04 | 1.5E-02         |
| AT4G08093               | <i>AT4G08093</i> | pseudogene of dihydroorotate dehydrogenase                               | -1.2         | 6.2E-01 | 7.4E-01         | 27.6                    | 1.4E-15 | 1.5E-11         |
| AT1G33960               | <i>AIG1</i>      | P-loop containing nucleoside triphosphate hydrolases superfamily protein | -3.8         | 3.7E-01 | 5.2E-01         | 20.0                    | 4.0E-04 | 8.5E-03         |
| AT3G60170               | <i>AT3G60170</i> | transposable_element_gene                                                | -6.6         | 1.6E-01 | 2.9E-01         | 17.8                    | 2.8E-05 | 1.4E-03         |
| AT2G11780               | <i>AT2G11780</i> | transposable_element_gene                                                | 1.4          | 7.5E-01 | 8.4E-01         | 12.8                    | 5.5E-04 | 1.1E-02         |
| AT3G21080               | <i>AT3G21080</i> | ABC transporter-like protein                                             | 11.0         | 8.1E-04 | 4.1E-03         | 11.5                    | 5.6E-04 | 1.1E-02         |
| AT4G32540               | <i>YUC1</i>      | Flavin-binding monooxygenase family protein                              | 4.0          | 3.0E-02 | 7.8E-02         | 7.2                     | 1.2E-03 | 1.8E-02         |
| AT4G15660               | <i>AT4G15660</i> | Thioredoxin superfamily protein                                          | 3.3          | 7.1E-03 | 2.5E-02         | 6.2                     | 4.9E-05 | 2.0E-03         |
| AT1G13400               | <i>NUB</i>       | C2H2 and C2HC zinc fingers superfamily protein                           | 2.8          | 9.3E-02 | 1.9E-01         | 6.0                     | 1.8E-03 | 2.4E-02         |
| AT1G68480               | <i>JAG</i>       | C2H2 and C2HC zinc fingers superfamily protein                           | 2.1          | 1.2E-01 | 2.4E-01         | 5.5                     | 2.5E-04 | 6.1E-03         |
| AT4G09430               | <i>AT4G09430</i> | disease resistance protein (TIR-NBS-LRR class)                           | 1.2          | 7.6E-01 | 8.5E-01         | 5.3                     | 2.3E-04 | 5.8E-03         |
| AT5G07040               | <i>AT5G07040</i> | RING/U-box superfamily protein                                           | -1.0         | 9.8E-01 | 9.9E-01         | 5.2                     | 5.5E-03 | 5.0E-02         |

|           |           |                                                                                           |      |         |         |     |         |         |
|-----------|-----------|-------------------------------------------------------------------------------------------|------|---------|---------|-----|---------|---------|
| AT5G35935 | AT5G35935 | transposable_element_gene                                                                 | -1.7 | 4.1E-02 | 9.9E-02 | 5.1 | 6.7E-08 | 2.2E-05 |
| AT5G51800 | AT5G51800 | Protein kinase superfamily protein                                                        | 2.3  | 9.6E-02 | 1.9E-01 | 4.9 | 7.0E-04 | 1.2E-02 |
| AT5G61610 | AT5G61610 | Oleosin family protein                                                                    | 1.7  | 3.8E-01 | 5.3E-01 | 4.9 | 2.9E-03 | 3.2E-02 |
| AT3G28770 | AT3G28770 | transmembrane protein, putative (DUF1216)                                                 | 1.5  | 4.4E-01 | 5.9E-01 | 4.8 | 8.9E-04 | 1.5E-02 |
| AT5G20240 | PI        | K-box region and MADS-box transcription factor family protein                             | 2.1  | 3.0E-02 | 7.9E-02 | 4.6 | 1.4E-05 | 8.7E-04 |
| AT4G15700 | AT4G15700 | Thioredoxin superfamily protein                                                           | 2.6  | 4.2E-03 | 1.6E-02 | 4.5 | 2.1E-05 | 1.1E-03 |
| AT4G02960 | RE2       | transposable_element_gene                                                                 | 1.1  | 7.7E-01 | 8.5E-01 | 4.4 | 3.8E-04 | 8.2E-03 |
| AT3G10780 | AT3G10780 | emp24/gp25L/p24 family/GOLD family protein                                                | -1.9 | 3.9E-01 | 5.4E-01 | 4.4 | 3.9E-03 | 4.0E-02 |
| AT2G04135 | AT2G04135 | transposable_element_gene                                                                 | -1.0 | 9.6E-01 | 9.8E-01 | 4.0 | 5.1E-03 | 4.7E-02 |
| AT5G55450 | AT5G55450 | Bifunctional inhibitor/lipid-transfer protein/seed storage 2S albumin superfamily protein | -1.2 | 6.1E-01 | 7.4E-01 | 4.0 | 4.7E-04 | 9.5E-03 |
| AT5G11412 | AT5G11412 | RNA-binding (RRM/RBD/RNP motifs) family protein                                           | -4.1 | 2.9E-02 | 7.5E-02 | 4.0 | 7.6E-04 | 1.3E-02 |
| AT4G29150 | IQD25     | IQ-domain 25                                                                              | 2.4  | 6.7E-02 | 1.5E-01 | 3.9 | 3.7E-03 | 3.8E-02 |
| AT2G25470 | RLP21     | receptor like protein 21                                                                  | 2.5  | 4.0E-02 | 9.9E-02 | 3.8 | 2.3E-03 | 2.8E-02 |
| AT4G23200 | CRK12     | cysteine-rich RLK (RECEPTOR-like protein kinase) 12                                       | 2.0  | 6.0E-02 | 1.3E-01 | 3.8 | 3.2E-04 | 7.2E-03 |
| AT4G34950 | AT4G34950 | Major facilitator superfamily protein                                                     | -1.1 | 5.3E-01 | 6.7E-01 | 3.8 | 3.2E-08 | 1.4E-05 |
| AT5G20230 | BCB       | blue-copper-binding protein                                                               | 6.4  | 4.8E-10 | 1.9E-08 | 3.7 | 4.4E-07 | 7.6E-05 |
| AT4G15680 | AT4G15680 | Thioredoxin superfamily protein                                                           | 3.9  | 4.0E-04 | 2.3E-03 | 3.6 | 6.5E-04 | 1.2E-02 |
| AT5G05900 | AT5G05900 | UDP-Glycosyltransferase superfamily protein                                               | 1.2  | 6.6E-01 | 7.7E-01 | 3.3 | 3.3E-03 | 3.6E-02 |
| AT1G02065 | SPL8      | squamosa promoter binding protein-like 8                                                  | 2.1  | 2.3E-02 | 6.4E-02 | 3.2 | 2.7E-04 | 6.5E-03 |
| AT2G02010 | GAD4      | glutamate decarboxylase 4                                                                 | 1.2  | 5.4E-01 | 6.8E-01 | 3.2 | 4.6E-05 | 1.9E-03 |
| AT1G16510 | AT1G16510 | SAUR-like auxin-responsive protein family                                                 | 1.4  | 2.2E-01 | 3.7E-01 | 3.1 | 2.6E-04 | 6.3E-03 |
| AT3G08770 | LTP6      | lipid transfer protein 6                                                                  | 1.6  | 3.1E-02 | 8.0E-02 | 3.1 | 8.7E-06 | 6.3E-04 |
| AT5G33370 | AT5G33370 | GDSL-like Lipase/Acylhydrolase superfamily protein                                        | 2.3  | 1.5E-02 | 4.6E-02 | 3.0 | 1.5E-03 | 2.1E-02 |
| AT2G35310 | AT2G35310 | Transcriptional factor B3 family protein                                                  | 1.2  | 7.1E-01 | 8.1E-01 | 3.0 | 2.0E-03 | 2.5E-02 |
| AT2G23050 | NPY4      | Phototropic-responsive NPH3 family protein                                                | -1.2 | 5.9E-01 | 7.2E-01 | 3.0 | 2.3E-03 | 2.8E-02 |
| AT4G22517 | AT4G22517 | Bifunctional inhibitor/lipid-transfer protein/seed storage 2S albumin superfamily protein | 1.9  | 6.7E-02 | 1.5E-01 | 2.9 | 3.3E-03 | 3.6E-02 |
| AT5G11320 | YUC4      | Flavin-binding monooxygenase family protein                                               | 1.4  | 2.6E-01 | 4.0E-01 | 2.9 | 4.1E-04 | 8.6E-03 |
| AT2G16230 | AT2G16230 | O-Glycosyl hydrolases family 17 protein                                                   | -2.2 | 1.0E-01 | 2.0E-01 | 2.9 | 5.6E-03 | 5.0E-02 |
| AT4G15690 | AT4G15690 | Thioredoxin superfamily protein                                                           | 1.6  | 1.6E-01 | 2.9E-01 | 2.9 | 1.5E-03 | 2.1E-02 |
| AT4G15670 | AT4G15670 | Thioredoxin superfamily protein                                                           | 2.7  | 3.8E-03 | 1.5E-02 | 2.8 | 2.5E-03 | 3.0E-02 |
| AT1G62500 | AT1G62500 | Bifunctional inhibitor/lipid-transfer protein/seed storage 2S albumin superfamily protein | 1.2  | 4.7E-01 | 6.2E-01 | 2.8 | 2.8E-04 | 6.6E-03 |
| AT1G26680 | AT1G26680 | transcriptional factor B3 family protein                                                  | -1.9 | 9.1E-02 | 1.9E-01 | 2.8 | 2.5E-03 | 3.0E-02 |
| AT5G35480 | AT5G35480 | hypothetical protein                                                                      | 1.7  | 1.3E-01 | 2.5E-01 | 2.8 | 4.3E-03 | 4.2E-02 |
| AT3G13400 | sk513     | SKU5 similar 13                                                                           | 1.7  | 2.8E-02 | 7.5E-02 | 2.7 | 6.4E-05 | 2.4E-03 |
| AT4G23590 | AT4G23590 | Tyrosine transaminase family protein                                                      | -2.2 | 2.5E-02 | 6.8E-02 | 2.7 | 1.1E-03 | 1.7E-02 |
| AT1G56150 | AT1G56150 | SAUR-like auxin-responsive protein family                                                 | 1.1  | 8.2E-01 | 8.9E-01 | 2.7 | 2.1E-05 | 1.1E-03 |
| AT3G28220 | AT3G28220 | TRAF-like family protein                                                                  | 5.8  | 1.9E-09 | 6.5E-08 | 2.7 | 4.9E-05 | 2.0E-03 |
| AT4G34400 | AT4G34400 | AP2/B3-like transcriptional factor family protein                                         | 1.8  | 9.9E-02 | 2.0E-01 | 2.7 | 4.9E-03 | 4.6E-02 |
| AT3G54160 | AT3G54160 | RNI-like superfamily protein                                                              | 1.4  | 3.9E-01 | 5.4E-01 | 2.7 | 3.6E-03 | 3.8E-02 |
| AT5G11410 | AT5G11410 | Protein kinase superfamily protein                                                        | 3.3  | 2.0E-04 | 1.3E-03 | 2.7 | 1.6E-03 | 2.1E-02 |
| AT1G28360 | ERF12     | ERF domain protein 12                                                                     | 1.3  | 3.1E-01 | 4.6E-01 | 2.7 | 7.2E-04 | 1.3E-02 |
| AT4G22485 | AT4G22485 | Bifunctional inhibitor/lipid-transfer protein/seed storage 2S albumin superfamily protein | 1.8  | 8.0E-02 | 1.7E-01 | 2.7 | 4.5E-03 | 4.4E-02 |
| AT5G53950 | CUC2      | NAC (No Apical Meristem) domain transcriptional regulator superfamily protein             | 1.4  | 3.4E-01 | 4.9E-01 | 2.6 | 1.8E-03 | 2.3E-02 |
| AT1G73620 | AT1G73620 | Pathogenesis-related thaumatin superfamily                                                | -1.9 | 7.0E-02 | 1.5E-01 | 2.6 | 2.3E-03 | 2.8E-02 |
| AT5G23940 | PEL3      | HXXXD-type acyl-transferase family protein                                                | 2.0  | 2.6E-04 | 1.6E-03 | 2.6 | 1.2E-06 | 1.6E-04 |
| AT3G18217 | MIR157C   |                                                                                           | 3.2  | 6.0E-04 | 3.2E-03 | 2.6 | 4.3E-03 | 4.2E-02 |
| AT1G10000 | AT1G10000 | Ribonuclease H-like superfamily protein                                                   | 1.6  | 1.4E-01 | 2.5E-01 | 2.6 | 4.3E-03 | 4.2E-02 |
| AT4G29030 | AT4G29030 | Putative membrane lipoprotein                                                             | 2.5  | 1.5E-05 | 1.4E-04 | 2.6 | 8.0E-06 | 6.0E-04 |
| AT3G06020 | FAF4      | FANTASTIC four-like protein (DUF3049)                                                     | 1.2  | 4.8E-01 | 6.2E-01 | 2.6 | 1.4E-04 | 4.1E-03 |
| AT3G14530 | AT3G14530 | Terpenoid synthases superfamily protein                                                   | -1.5 | 2.3E-01 | 3.7E-01 | 2.5 | 4.2E-03 | 4.2E-02 |
| AT1G75430 | BLH11     | BEL1-like homeodomain 11                                                                  | 1.2  | 5.1E-01 | 6.5E-01 | 2.5 | 3.1E-03 | 3.4E-02 |
| AT5G18600 | AT5G18600 | Thioredoxin superfamily protein                                                           | 1.2  | 3.6E-01 | 5.2E-01 | 2.5 | 3.5E-04 | 7.7E-03 |
| AT5G48940 | AT5G48940 | Leucine-rich repeat transmembrane protein kinase family protein                           | -1.5 | 2.4E-01 | 3.9E-01 | 2.5 | 3.1E-03 | 3.4E-02 |
| AT1G64920 | AT1G64920 | UDP-Glycosyltransferase superfamily protein                                               | -1.5 | 1.4E-01 | 2.6E-01 | 2.5 | 1.0E-04 | 3.2E-03 |
| AT5G25980 | TGG2      | glucoside glucohydrolase 2                                                                | 1.1  | 5.4E-01 | 6.7E-01 | 2.5 | 2.0E-05 | 1.1E-03 |
| AT1G05280 | AT1G05280 | ERV-F (C)1 provirus ancestral Env polyprotein, putative (DUF604)                          | -1.4 | 3.9E-01 | 5.4E-01 | 2.5 | 4.5E-03 | 4.4E-02 |
| AT2G14820 | NPY2      | Phototropic-responsive NPH3 family protein                                                | 1.0  | 8.9E-01 | 9.4E-01 | 2.5 | 2.2E-03 | 2.7E-02 |
| AT4G23750 | CRF2      | cytokinin response factor 2                                                               | 1.0  | 9.6E-01 | 9.8E-01 | 2.4 | 3.6E-07 | 6.4E-05 |
| AT4G30130 | AT4G30130 | DUF630 family protein (DUF630 and DUF632)                                                 | 1.3  | 3.2E-01 | 4.7E-01 | 2.4 | 7.0E-04 | 1.2E-02 |
| AT1G13610 | AT1G13610 | alpha/beta-Hydrolases superfamily protein                                                 | 10.7 | 3.4E-11 | 1.9E-09 | 2.4 | 2.7E-03 | 3.1E-02 |
| AT1G78750 | AT1G78750 | F-box/RNI-like superfamily protein                                                        | 1.5  | 5.3E-02 | 1.2E-01 | 2.4 | 7.1E-05 | 2.6E-03 |
| AT1G60590 | AT1G60590 | Pectin lyase-like superfamily protein                                                     | 4.8  | 2.8E-08 | 6.5E-07 | 2.4 | 4.0E-04 | 8.5E-03 |
| AT1G74890 | ARR15     | response regulator 15                                                                     | -1.0 | 8.9E-01 | 9.4E-01 | 2.4 | 2.5E-05 | 1.3E-03 |
| AT1G03010 | AT1G03010 | Phototropic-responsive NPH3 family protein                                                | 1.8  | 3.7E-03 | 1.4E-02 | 2.4 | 4.1E-05 | 1.7E-03 |
| AT2G36770 | AT2G36770 | UDP-Glycosyltransferase superfamily protein                                               | 1.4  | 2.3E-01 | 3.7E-01 | 2.4 | 3.4E-03 | 3.6E-02 |
| AT1G53160 | SPL4      | squamosa promoter binding protein-like 4                                                  | -1.2 | 4.6E-01 | 6.1E-01 | 2.3 | 1.4E-03 | 2.0E-02 |
| AT2G24700 | AT2G24700 | Transcriptional factor B3 family protein                                                  | 1.0  | 8.3E-01 | 9.0E-01 | 2.3 | 2.0E-04 | 5.2E-03 |
| AT2G26220 | AT2G26220 | pseudogene of Polynucleotidyl transferase%2C ribonuclease H-like superfamily protein      | -1.3 | 2.6E-01 | 4.0E-01 | 2.3 | 6.0E-04 | 1.1E-02 |
| AT4G26150 | CGA1      | cytokinin-responsive gata factor 1                                                        | 3.4  | 1.3E-10 | 6.1E-09 | 2.3 | 3.4E-07 | 6.2E-05 |
| AT1G11070 | AT1G11070 | hydroxyproline-rich glycoprotein family protein                                           | -1.9 | 3.9E-02 | 9.6E-02 | 2.3 | 1.5E-03 | 2.1E-02 |
| AT5G62360 | AT5G62360 | Plant invertase/pectin methylesterase inhibitor superfamily protein                       | 2.3  | 7.1E-04 | 3.7E-03 | 2.3 | 9.4E-04 | 1.5E-02 |
| AT2G04450 | NUDT6     | nudix hydrolase homolog 6                                                                 | -1.6 | 1.7E-01 | 3.0E-01 | 2.3 | 4.6E-03 | 4.4E-02 |

|           |           |                                                                          |      |         |         |     |         |         |
|-----------|-----------|--------------------------------------------------------------------------|------|---------|---------|-----|---------|---------|
| AT5G46500 | AT5G46500 | protein VARIATION IN COMPOUND TRIGGERED ROOT growth protein              | 1.3  | 3.4E-01 | 4.9E-01 | 2.3 | 4.5E-04 | 9.2E-03 |
| AT2G26211 | MIR825A   |                                                                          | -1.3 | 4.6E-01 | 6.1E-01 | 2.3 | 5.3E-03 | 4.9E-02 |
| AT3G14930 | HEME1     | Uroporphyrinogen decarboxylase                                           | 1.2  | 2.1E-01 | 3.5E-01 | 2.2 | 6.7E-08 | 2.2E-05 |
| AT1G68570 | AT1G68570 | Major facilitator superfamily protein                                    | 2.9  | 2.8E-07 | 4.7E-06 | 2.2 | 3.0E-05 | 1.4E-03 |
| AT1G63820 | AT1G63820 | CCT motif family protein                                                 | -1.3 | 2.9E-01 | 4.4E-01 | 2.2 | 5.4E-04 | 1.0E-02 |
| AT3G44450 | AT3G44450 | hypothetical protein                                                     | 30.7 | 2.7E-21 | 2.6E-18 | 2.2 | 3.4E-04 | 7.6E-03 |
| AT5G09220 | AAP2      | amino acid permease 2                                                    | -1.7 | 1.0E-03 | 5.0E-03 | 2.2 | 1.2E-05 | 7.5E-04 |
| AT5G48820 | ICK6      | inhibitor/interactor with cyclin-dependent kinase                        | 1.5  | 8.7E-02 | 1.8E-01 | 2.2 | 1.0E-03 | 1.6E-02 |
| AT1G22400 | UGT85A1   | UDP-Glycosyltransferase superfamily protein                              | 2.5  | 6.1E-08 | 1.3E-06 | 2.1 | 1.5E-06 | 1.9E-04 |
| AT5G51910 | AT5G51910 | TCP family transcription factor                                          | 1.4  | 1.9E-02 | 5.4E-02 | 2.1 | 9.6E-06 | 6.7E-04 |
| AT4G19080 | AT4G19080 | hypothetical protein (DUF594)                                            | -1.0 | 8.6E-01 | 9.2E-01 | 2.1 | 4.0E-03 | 4.1E-02 |
| AT3G49410 | AT3G49410 | Transcription factor IIIC, subunit 5                                     | 1.1  | 7.1E-01 | 8.1E-01 | 2.1 | 2.3E-03 | 2.8E-02 |
| AT1G33080 | AT1G33080 | MATE efflux family protein                                               | 1.3  | 1.6E-01 | 2.9E-01 | 2.1 | 3.2E-04 | 7.2E-03 |
| AT2G40200 | AT2G40200 | basic helix-loop-helix (bHLH) DNA-binding superfamily protein            | 3.9  | 1.7E-06 | 2.2E-05 | 2.1 | 4.5E-03 | 4.4E-02 |
| AT3G24240 | AT3G24240 | Leucine-rich repeat receptor-like protein kinase family protein          | 1.6  | 1.7E-02 | 5.1E-02 | 2.1 | 5.3E-04 | 1.0E-02 |
| AT5G08030 | GDPD6     | PLC-like phosphodiesterases superfamily protein                          | -1.1 | 6.5E-01 | 7.7E-01 | 2.1 | 1.9E-03 | 2.4E-02 |
| AT2G15880 | AT2G15880 | Leucine-rich repeat (LRR) family protein                                 | -1.4 | 1.1E-02 | 3.4E-02 | 2.1 | 4.2E-06 | 3.8E-04 |
| AT3G08920 | AT3G08920 | Rhodanese/Cell cycle control phosphatase superfamily protein             | 1.1  | 2.6E-01 | 4.1E-01 | 2.1 | 2.2E-09 | 2.0E-06 |
| AT5G24420 | PGL5      | 6-phosphogluconolactonase 5                                              | 5.9  | 1.7E-10 | 8.1E-09 | 2.1 | 9.9E-04 | 1.6E-02 |
| AT5G44572 | AT5G44572 | transmembrane protein                                                    | 1.6  | 1.7E-03 | 7.5E-03 | 2.1 | 1.6E-05 | 9.3E-04 |
| AT3G13960 | GRF5      | growth-regulating factor 5                                               | 1.0  | 9.1E-01 | 9.5E-01 | 2.1 | 4.1E-03 | 4.1E-02 |
| AT2G23130 | AGP17     | arabinogalactan protein 17                                               | 1.8  | 5.5E-07 | 8.4E-06 | 2.1 | 8.8E-09 | 5.9E-06 |
| AT2G29670 | AT2G29670 | Tetratricopeptide repeat (TPR)-like superfamily protein                  | 2.4  | 1.6E-05 | 1.5E-04 | 2.1 | 2.3E-04 | 5.8E-03 |
| AT1G35730 | PUM9      | pumilio 9                                                                | -2.0 | 2.0E-02 | 5.7E-02 | 2.1 | 5.2E-03 | 4.8E-02 |
| AT3G15850 | FAD5      | fatty acid desaturase 5                                                  | 2.8  | 6.7E-09 | 1.9E-07 | 2.1 | 3.8E-06 | 3.5E-04 |
| AT5G27230 | AT5G27230 | Frigida-like protein                                                     | 1.4  | 1.2E-01 | 2.3E-01 | 2.1 | 5.8E-04 | 1.1E-02 |
| AT5G09445 | AT5G09445 | hypothetical protein                                                     | 1.3  | 2.4E-01 | 3.8E-01 | 2.0 | 2.9E-03 | 3.3E-02 |
| AT1G33930 | AT1G33930 | P-loop containing nucleoside triphosphate hydrolases superfamily protein | 1.3  | 2.4E-01 | 3.8E-01 | 2.0 | 1.2E-03 | 1.8E-02 |
| AT2G33850 | AT2G33850 | E6-like protein                                                          | 2.0  | 5.2E-04 | 2.8E-03 | 2.0 | 3.9E-04 | 8.4E-03 |
| AT3G20440 | EMB2729   | Alpha amylase family protein                                             | 2.6  | 1.9E-05 | 1.7E-04 | 2.0 | 9.1E-04 | 1.5E-02 |
| AT5G64490 | AT5G64490 | ARM repeat superfamily protein                                           | -1.5 | 8.2E-02 | 1.7E-01 | 2.0 | 7.8E-04 | 1.3E-02 |
| AT1G26790 | AT1G26790 | Dof-type zinc finger DNA-binding family protein                          | 6.4  | 2.2E-11 | 1.3E-09 | 2.0 | 1.4E-03 | 2.0E-02 |

| Col UV/WL Down |           |                                                                                           | Col UV/WL    |         |                 | pif45 / Col WL    |         |                 |
|----------------|-----------|-------------------------------------------------------------------------------------------|--------------|---------|-----------------|-------------------|---------|-----------------|
| AGI            | gene      | description                                                                               | Col_UV/WL_FC | pvalue  | pvalue_with_FDR | pif45 / Col_WL_FC | pvalue  | pvalue_with_FDR |
| AT1G74110      | CYP78A10  | cytochrome P450, family 78, subfamily A, polypeptide 10                                   | -64.2        | 2.8E-03 | 1.1E-02         | -18.3             | 6.1E-03 | 5.3E-02         |
| ATMG01320      | NAD2B     | NADH dehydrogenase 2B                                                                     | -58.9        | 5.6E-04 | 3.0E-03         | -4.4              | 2.5E-02 | 1.3E-01         |
| AT5G10040      | AT5G10040 | transmembrane protein                                                                     | -47.7        | 2.5E-03 | 1.1E-02         | 1.7               | 3.0E-01 | 5.6E-01         |
| AT1G52580      | RBL5      | RHOMBOID-like protein 5                                                                   | -34.7        | 2.6E-03 | 1.1E-02         | -1.5              | 4.8E-01 | 7.2E-01         |
| AT4G11020      | AT4G11020 | hypothetical protein                                                                      | -32.6        | 7.7E-03 | 2.6E-02         | -1.8              | 4.0E-01 | 6.5E-01         |
| AT3G28310      | AT3G28310 | hypothetical protein (DUF677)                                                             | -32.2        | 2.1E-03 | 9.2E-03         | -1.4              | 5.6E-01 | 7.7E-01         |
| AT4G37950      | AT4G37950 | Rhamnogalacturonate lyase family protein                                                  | -27.6        | 1.4E-07 | 2.6E-06         | 1.2               | 5.3E-01 | 7.6E-01         |
| AT5G54190      | PORA      | protochlorophyllide oxidoreductase A                                                      | -23.9        | 2.0E-08 | 4.8E-07         | -1.1              | 8.5E-01 | 9.4E-01         |
| AT2G33790      | AGP30     | arabinogalactan protein 30                                                                | -19.4        | 4.3E-07 | 6.8E-06         | 2.2               | 1.2E-02 | 8.4E-02         |
| AT2G43860      | AT2G43860 | Pectin lyase-like superfamily protein                                                     | -16.9        | 2.5E-05 | 2.2E-04         | -2.4              | 3.6E-02 | 1.7E-01         |
| AT2G14560      | LURP1     | LURP-one-like protein (DUF567)                                                            | -14.7        | 8.8E-05 | 6.3E-04         | -1.4              | 4.0E-01 | 6.5E-01         |
| AT1G70260      | UMAMIT36  | nodulin MtN21 /EamA-like transporter family                                               | -12.6        | 1.6E-05 | 1.5E-04         | -2.3              | 4.5E-02 | 1.9E-01         |
| AT1G70130      | AT1G70130 | Concanavalin A-like lectin protein kinase family protein                                  | -12.4        | 1.5E-02 | 4.4E-02         | -7.7              | 2.4E-02 | 1.3E-01         |
| AT2G44840      | ERF13     | ethylene-responsive element binding factor 13                                             | -12.4        | 1.7E-04 | 1.1E-03         | -1.3              | 5.4E-01 | 7.6E-01         |
| AT2G41280      | M10       | late embryogenesis abundant protein (M10) / LEA protein M10                               | -11.1        | 6.4E-03 | 2.3E-02         | -3.8              | 4.7E-02 | 2.0E-01         |
| AT3G57950      | AT3G57950 | cotton fiber protein                                                                      | -10.8        | 7.3E-04 | 3.7E-03         | 1.9               | 9.5E-02 | 3.0E-01         |
| AT5G46890      | AT5G46890 | Bifunctional inhibitor/lipid-transfer protein/seed storage 2S albumin superfamily protein | -10.6        | 4.7E-17 | 1.5E-14         | 1.3               | 3.9E-02 | 1.7E-01         |
| AT5G02000      | AT5G02000 | hypothetical protein                                                                      | -10.1        | 3.8E-03 | 1.5E-02         | 1.7               | 2.0E-01 | 4.5E-01         |
| AT3G28380      | ABCB17    | P-glycoprotein 17                                                                         | -10.0        | 3.4E-03 | 1.3E-02         | 1.3               | 5.4E-01 | 7.6E-01         |
| AT1G23160      | AT1G23160 | Auxin-responsive GH3 family protein                                                       | -9.8         | 2.7E-07 | 4.6E-06         | 1.7               | 4.1E-02 | 1.8E-01         |
| AT2G44220      | AT2G44220 | NEP-interacting protein (DUF239)                                                          | -9.8         | 5.1E-03 | 1.9E-02         | -3.0              | 6.5E-02 | 2.4E-01         |
| AT2G26390      | AT2G26390 | Serine protease inhibitor (SERPIN) family protein                                         | -9.8         | 4.4E-05 | 3.5E-04         | -1.9              | 8.4E-02 | 2.8E-01         |
| AT2G22930      | AT2G22930 | UDP-Glycosyltransferase superfamily protein                                               | -9.4         | 3.5E-10 | 1.5E-08         | 1.4               | 5.6E-02 | 2.2E-01         |
| AT1G62280      | SLAH1     | SLAC1 homologue 1                                                                         | -9.3         | 9.2E-11 | 4.7E-09         | -1.4              | 9.7E-02 | 3.0E-01         |
| AT4G00910      | AT4G00910 | aluminum activated malate transporter family protein                                      | -9.0         | 4.3E-13 | 4.3E-11         | -1.2              | 3.1E-01 | 5.8E-01         |
| AT4G01890      | AT4G01890 | Pectin lyase-like superfamily protein                                                     | -8.9         | 4.6E-07 | 7.2E-06         | 1.1               | 7.2E-01 | 8.8E-01         |
| AT1G19250      | FMO1      | flavin-dependent monooxygenase 1                                                          | -8.7         | 2.4E-07 | 4.1E-06         | 1.1               | 6.6E-01 | 8.4E-01         |
| AT1G06350      | ADS4      | Fatty acid desaturase family protein                                                      | -8.7         | 4.1E-12 | 3.0E-10         | -1.7              | 3.8E-03 | 3.9E-02         |
| AT4G33790      | CER4      | Jojoba acyl CoA reductase-related male sterility protein                                  | -8.6         | 7.5E-09 | 2.1E-07         | -1.1              | 6.4E-01 | 8.3E-01         |
| AT3G51410      | AT3G51410 | hypothetical protein (DUF241)                                                             | -8.6         | 1.1E-02 | 3.6E-02         | -2.0              | 2.4E-01 | 5.0E-01         |
| AT4G19690      | IRT1      | iron-regulated transporter 1                                                              | -8.5         | 1.6E-04 | 1.1E-03         | -2.0              | 1.3E-01 | 3.5E-01         |
| AT1G44020      | AT1G44020 | Cysteine/Histidine-rich C1 domain family protein                                          | -8.2         | 7.2E-06 | 7.6E-05         | -1.6              | 1.4E-01 | 3.7E-01         |
| ATCG00450      | TRNV.1    | tRNA-Val                                                                                  | -8.0         | 5.9E-03 | 2.1E-02         | -6.0              | 9.5E-03 | 7.1E-02         |
| AT3G15250      | AT3G15250 | TPRXL                                                                                     | -7.8         | 1.1E-05 | 1.1E-04         | 1.1               | 8.1E-01 | 9.2E-01         |
| AT5G26300      | AT5G26300 | TRAF-like family protein                                                                  | -7.7         | 4.0E-03 | 1.6E-02         | -1.6              | 3.4E-01 | 6.0E-01         |
| AT2G13810      | ALD1      | AGD2-like defense response protein 1                                                      | -7.4         | 1.5E-05 | 1.4E-04         | 1.5               | 1.6E-01 | 3.9E-01         |



|           |                  |                                                                                           |      |         |         |      |         |         |
|-----------|------------------|-------------------------------------------------------------------------------------------|------|---------|---------|------|---------|---------|
| AT3G47760 | <i>ABCA5</i>     | ABC2 homolog 4                                                                            | -7.3 | 9.9E-03 | 3.2E-02 | -1.1 | 8.8E-01 | 9.5E-01 |
| AT5G62330 | <i>AT5G62330</i> | hypothetical protein                                                                      | -7.3 | 9.0E-04 | 4.5E-03 | 1.6  | 1.5E-01 | 3.8E-01 |
| AT3G55515 | <i>RTFL7</i>     | ROTUNDIFOLIA like 7                                                                       | -7.2 | 1.3E-03 | 6.3E-03 | -1.6 | 2.6E-01 | 5.3E-01 |
| ATCG00920 | <i>RRN16S.1</i>  |                                                                                           | -7.1 | 6.2E-03 | 2.2E-02 | -4.8 | 1.8E-02 | 1.1E-01 |
| AT3G06437 | <i>AT3G06437</i> | pseudogene of hypothetical protein                                                        | -7.1 | 8.6E-03 | 2.9E-02 | -2.0 | 2.1E-01 | 4.6E-01 |
| AT3G55180 | <i>AT3G55180</i> | alpha/beta-Hydrolases superfamily protein                                                 | -7.0 | 6.6E-03 | 2.3E-02 | -1.2 | 6.4E-01 | 8.3E-01 |
| AT5G46900 | <i>AT5G46900</i> | Bifunctional inhibitor/lipid-transfer protein/seed storage 2S albumin superfamily protein | -6.9 | 1.7E-12 | 1.4E-10 | 1.4  | 2.3E-02 | 1.2E-01 |
| AT1G44318 | <i>hemb2</i>     | Aldolase superfamily protein                                                              | -6.9 | 1.6E-04 | 1.1E-03 | -1.2 | 5.5E-01 | 7.7E-01 |
| AT3G02810 | <i>AT3G02810</i> | Protein kinase superfamily protein                                                        | -6.7 | 6.5E-04 | 3.4E-03 | -2.1 | 6.7E-02 | 2.4E-01 |
| AT1G63950 | <i>AT1G63950</i> | Heavy metal transport/detoxification superfamily protein                                  | -6.7 | 3.9E-03 | 1.5E-02 | 1.2  | 6.6E-01 | 8.4E-01 |
| AT5G10430 | <i>AGP4</i>      | arabinogalactan protein 4                                                                 | -6.5 | 2.7E-12 | 2.1E-10 | -1.9 | 4.0E-04 | 8.4E-03 |
| AT5G60010 | <i>AT5G60010</i> | ferric reductase-like transmembrane component family protein                              | -6.3 | 7.5E-04 | 3.9E-03 | -1.8 | 1.4E-01 | 3.7E-01 |
| AT2G31082 | <i>CLE7</i>      | CLAVATA3/ESR-RELATED 7                                                                    | -6.3 | 4.1E-03 | 1.6E-02 | 1.2  | 6.7E-01 | 8.4E-01 |
| AT4G29450 | <i>AT4G29450</i> | Leucine-rich repeat protein kinase family protein                                         | -6.2 | 5.9E-07 | 8.9E-06 | 1.0  | 9.1E-01 | 9.7E-01 |
| ATCG01180 | <i>RRN23S.2</i>  |                                                                                           | -6.1 | 1.9E-03 | 8.1E-03 | -2.8 | 3.6E-02 | 1.6E-01 |
| AT5G44770 | <i>AT5G44770</i> | Cysteine/Histidine-rich C1 domain family protein                                          | -6.1 | 1.4E-02 | 4.2E-02 | 1.7  | 2.3E-01 | 4.9E-01 |
| AT4G22217 | <i>AT4G22217</i> | defensin-like protein                                                                     | -6.0 | 7.0E-03 | 2.5E-02 | -1.5 | 3.7E-01 | 6.3E-01 |
| AT4G21850 | <i>MSRB9</i>     | methionine sulfoxide reductase B9                                                         | -5.8 | 4.7E-12 | 3.4E-10 | 1.3  | 6.5E-02 | 2.4E-01 |
| AT4G26460 | <i>AT4G26460</i> | S-adenosyl-L-methionine-dependent methyltransferases superfamily protein                  | -5.8 | 6.4E-03 | 2.3E-02 | 1.3  | 5.6E-01 | 7.8E-01 |
| AT5G67060 | <i>HEC1</i>      | basic helix-loop-helix (bHLH) DNA-binding superfamily protein                             | -5.7 | 3.0E-09 | 9.6E-08 | -1.8 | 4.8E-03 | 4.6E-02 |
| AT5G33390 | <i>AT5G33390</i> | glycine-rich protein                                                                      | -5.6 | 7.8E-03 | 2.7E-02 | -2.8 | 5.1E-02 | 2.1E-01 |
| AT2G38600 | <i>AT2G38600</i> | HAD superfamily, subfamily IIIB acid phosphatase                                          | -5.6 | 1.4E-04 | 9.3E-04 | -1.4 | 2.5E-01 | 5.2E-01 |
| AT3G01260 | <i>AT3G01260</i> | Galactose mutarotase-like superfamily protein                                             | -5.5 | 1.8E-12 | 1.5E-10 | 1.2  | 1.3E-01 | 3.6E-01 |
| AT1G67100 | <i>LBD40</i>     | LOB domain-containing protein 40                                                          | -5.5 | 1.6E-06 | 2.1E-05 | -1.3 | 3.6E-01 | 6.2E-01 |
| AT3G45960 | <i>EXLA3</i>     | expansin-like A3                                                                          | -5.5 | 6.9E-06 | 7.3E-05 | -1.2 | 4.5E-01 | 7.0E-01 |
| AT1G60050 | <i>UMAMIT35</i>  | Nodulin MtN21 /EamA-like transporter family protein                                       | -5.4 | 1.2E-05 | 1.2E-04 | -1.1 | 6.2E-01 | 8.2E-01 |
| AT5G01330 | <i>PDC3</i>      | pyruvate decarboxylase-3                                                                  | -5.4 | 4.7E-11 | 2.6E-09 | -1.1 | 6.6E-01 | 8.4E-01 |
| AT5G05290 | <i>EXPA2</i>     | expansin A2                                                                               | -5.3 | 1.3E-06 | 1.8E-05 | 1.4  | 1.5E-01 | 3.9E-01 |
| AT2G44910 | <i>HB4</i>       | homeobox-leucine zipper protein 4                                                         | -5.2 | 1.0E-04 | 7.3E-04 | -2.7 | 8.6E-03 | 6.7E-02 |
| ATCG00570 | <i>PSBF</i>      | photosystem II reaction center protein F                                                  | -5.2 | 1.5E-02 | 4.4E-02 | -3.6 | 3.9E-02 | 1.7E-01 |
| AT4G23030 | <i>AT4G23030</i> | MATE efflux family protein                                                                | -5.2 | 6.7E-13 | 6.4E-11 | -1.4 | 1.4E-02 | 9.0E-02 |
| AT1G70850 | <i>MLP34</i>     | MLP-like protein 34                                                                       | -5.2 | 7.1E-08 | 1.4E-06 | -1.8 | 1.7E-02 | 1.0E-01 |
| AT1G77530 | <i>AT1G77530</i> | O-methyltransferase family protein                                                        | -5.2 | 2.2E-04 | 1.4E-03 | 1.1  | 6.8E-01 | 8.5E-01 |
| AT2G40250 | <i>AT2G40250</i> | SGNH hydrolase-type esterase superfamily protein                                          | -5.2 | 7.7E-03 | 2.6E-02 | -1.2 | 7.3E-01 | 8.8E-01 |
| AT2G17850 | <i>AT2G17850</i> | Rhodanese/Cell cycle control phosphatase superfamily protein                              | -5.2 | 2.7E-04 | 1.6E-03 | 1.1  | 7.2E-01 | 8.7E-01 |
| AT1G04560 | <i>AT1G04560</i> | AWPM-19-like family protein                                                               | -5.1 | 8.7E-03 | 2.9E-02 | 1.8  | 1.7E-01 | 4.1E-01 |
| AT3G12240 | <i>SCPL15</i>    | serine carboxypeptidase-like 15                                                           | -5.1 | 1.8E-07 | 3.1E-06 | 1.3  | 1.4E-01 | 3.8E-01 |
| AT5G59370 | <i>ACT4</i>      | actin 4                                                                                   | -5.0 | 3.4E-03 | 1.4E-02 | -1.7 | 1.9E-01 | 4.5E-01 |
| AT4G25250 | <i>AT4G25250</i> | Plant invertase/pectin methylesterase inhibitor superfamily protein                       | -5.0 | 4.2E-08 | 9.1E-07 | 1.7  | 7.2E-03 | 5.9E-02 |
| AT5G39820 | <i>NAC094</i>    | NAC domain containing protein 94                                                          | -5.0 | 1.3E-02 | 4.1E-02 | 1.1  | 8.6E-01 | 9.5E-01 |
| AT3G17760 | <i>GAD5</i>      | glutamate decarboxylase 5                                                                 | -5.0 | 9.2E-03 | 3.0E-02 | 1.4  | 4.0E-01 | 6.5E-01 |
| AT4G09130 | <i>AT4G09130</i> | RING/U-box superfamily protein                                                            | -5.0 | 9.0E-04 | 4.5E-03 | -1.1 | 7.5E-01 | 8.9E-01 |
| AT1G23060 | <i>MDP40</i>     | hypothetical protein                                                                      | -5.0 | 8.9E-09 | 2.4E-07 | -1.7 | 7.2E-03 | 5.9E-02 |
| ATMG01130 | <i>ORF106F</i>   | hypothetical protein                                                                      | -4.9 | 8.4E-03 | 2.8E-02 | -1.7 | 2.6E-01 | 5.2E-01 |
| AT3G59370 | <i>AT3G59370</i> | Vacuolar calcium-binding protein-like protein                                             | -4.9 | 1.6E-09 | 5.5E-08 | 1.4  | 5.6E-02 | 2.2E-01 |
| AT5G62340 | <i>AT5G62340</i> | Plant invertase/pectin methylesterase inhibitor superfamily protein                       | -4.9 | 2.3E-04 | 1.4E-03 | 2.1  | 2.5E-02 | 1.3E-01 |
| AT5G25415 | <i>AT5G25415</i> | hypothetical protein (DUF239)                                                             | -4.8 | 1.9E-05 | 1.8E-04 | 1.8  | 1.3E-02 | 8.8E-02 |
| AT3G47380 | <i>AT3G47380</i> | Plant invertase/pectin methylesterase inhibitor superfamily protein                       | -4.8 | 1.7E-04 | 1.1E-03 | 1.6  | 1.3E-01 | 3.6E-01 |
| AT3G50130 | <i>AT3G50130</i> | transmembrane protein, putative (DUF247)                                                  | -4.8 | 7.6E-11 | 3.9E-09 | -1.4 | 1.8E-02 | 1.1E-01 |
| AT4G34790 | <i>AT4G34790</i> | SAUR-like auxin-responsive protein family                                                 | -4.7 | 1.3E-09 | 4.7E-08 | -1.1 | 4.5E-01 | 7.0E-01 |
| AT3G19320 | <i>AT3G19320</i> | Leucine-rich repeat (LRR) family protein                                                  | -4.7 | 6.1E-06 | 6.6E-05 | 1.1  | 6.4E-01 | 8.3E-01 |
| AT5G63650 | <i>SNRK2.5</i>   | SNF1-related protein kinase 2.5                                                           | -4.7 | 3.9E-09 | 1.2E-07 | -1.7 | 4.5E-03 | 4.4E-02 |
| ATCG00490 | <i>RBCL</i>      | ribulose-bisphosphate carboxylase                                                         | -4.7 | 6.6E-03 | 2.3E-02 | -3.8 | 1.6E-02 | 9.9E-02 |
| AT1G06120 | <i>AT1G06120</i> | Fatty acid desaturase family protein                                                      | -4.7 | 2.7E-08 | 6.2E-07 | 1.3  | 1.3E-01 | 3.6E-01 |
| ATCG00950 | <i>RRN23S.1</i>  |                                                                                           | -4.7 | 7.4E-03 | 2.6E-02 | -3.5 | 2.3E-02 | 1.2E-01 |
| AT2G28780 | <i>AT2G28780</i> | P-hydroxybenzoic acid efflux pump subunit                                                 | -4.7 | 4.9E-12 | 3.5E-10 | 1.1  | 5.3E-01 | 7.5E-01 |
| AT3G50330 | <i>HEC2</i>      | basic helix-loop-helix (bHLH) DNA-binding superfamily protein                             | -4.6 | 2.4E-03 | 1.0E-02 | -1.7 | 1.7E-01 | 4.2E-01 |
| AT5G44417 | <i>AT5G44417</i> | pseudogene of FAD-binding Berberine family                                                | -4.6 | 2.7E-06 | 3.3E-05 | 1.3  | 2.1E-01 | 4.6E-01 |
| AT1G22290 | <i>AT1G22290</i> | 14-3-3 family protein                                                                     | -4.6 | 1.5E-05 | 1.4E-04 | -1.2 | 4.8E-01 | 7.2E-01 |
| AT3G46400 | <i>AT3G46400</i> | Leucine-rich repeat protein kinase family protein                                         | -4.6 | 1.5E-06 | 2.0E-05 | 1.2  | 4.6E-01 | 7.0E-01 |
| AT3G27970 | <i>AT3G27970</i> | Exonuclease family protein                                                                | -4.6 | 1.3E-03 | 6.0E-03 | -1.4 | 4.0E-01 | 6.5E-01 |
| ATCG00580 | <i>PSBE</i>      | photosystem II reaction center protein E                                                  | -4.6 | 9.5E-03 | 3.1E-02 | -3.8 | 1.7E-02 | 1.0E-01 |
| AT1G11125 | <i>AT1G11125</i> | hypothetical protein                                                                      | -4.5 | 4.8E-06 | 5.5E-05 | -1.6 | 4.6E-02 | 1.9E-01 |
| AT4G12510 | <i>AT4G12510</i> | Bifunctional inhibitor/lipid-transfer protein/seed storage 2S albumin superfamily protein | -4.5 | 5.6E-10 | 2.2E-08 | 1.2  | 2.1E-01 | 4.7E-01 |
| AT3G55310 | <i>AT3G55310</i> | NAD(P)-binding Rossmann-fold superfamily protein                                          | -4.4 | 1.3E-04 | 8.8E-04 | 1.3  | 4.2E-01 | 6.7E-01 |
| AT5G58784 | <i>AT5G58784</i> | Undecaprenyl pyrophosphate synthetase family protein                                      | -4.4 | 5.2E-04 | 2.8E-03 | 1.6  | 9.9E-02 | 3.1E-01 |
| AT2G04038 | <i>bZIP48</i>    | basic leucine-zipper 48                                                                   | -4.4 | 7.1E-03 | 2.5E-02 | 1.6  | 2.0E-01 | 4.6E-01 |
| AT2G39510 | <i>UMAMIT14</i>  | nodulin MtN21 /EamA-like transporter family                                               | -4.4 | 1.3E-02 | 4.0E-02 | 2.5  | 1.4E-02 | 9.1E-02 |
| AT3G53232 | <i>RTFL1</i>     | ROTUNDIFOLIA like 1                                                                       | -4.4 | 5.5E-03 | 2.0E-02 | -3.8 | 8.1E-03 | 6.5E-02 |
| AT1G32450 | <i>NRT1.5</i>    | nitrate transporter 1.5                                                                   | -4.4 | 1.9E-10 | 8.6E-09 | 1.4  | 3.2E-02 | 1.5E-01 |

|           |                  |                                                                                           |      |         |         |      |         |         |
|-----------|------------------|-------------------------------------------------------------------------------------------|------|---------|---------|------|---------|---------|
| AT2G20750 | <i>EXPB1</i>     | expansin B1                                                                               | -4.4 | 3.1E-13 | 3.3E-11 | -1.5 | 2.5E-03 | 2.9E-02 |
| AT1G54020 | <i>AT1G54020</i> | GDSL-like Lipase/Acylhydrolase superfamily protein                                        | -4.3 | 5.4E-03 | 2.0E-02 | 1.2  | 5.9E-01 | 7.9E-01 |
| AT1G68825 | <i>RTFL15</i>    | ROTUNDIFOLIA like 15                                                                      | -4.3 | 4.8E-03 | 1.8E-02 | -1.2 | 6.9E-01 | 8.6E-01 |
| AT2G03370 | <i>AT2G03370</i> | O-linked-mannose beta-1,4-N-acetylglucosaminyltransferase-like protein                    | -4.3 | 2.9E-05 | 2.5E-04 | 1.2  | 4.7E-01 | 7.2E-01 |
| AT1G27140 | <i>GSTU14</i>    | glutathione S-transferase tau 14                                                          | -4.3 | 2.5E-05 | 2.2E-04 | 1.9  | 1.1E-02 | 7.6E-02 |
| AT1G13420 | <i>ST4B</i>      | sulfotransferase 4B                                                                       | -4.3 | 3.7E-07 | 6.0E-06 | 1.3  | 1.5E-01 | 3.9E-01 |
| AT3G27500 | <i>AT3G27500</i> | Cysteine/Histidine-rich C1 domain family protein                                          | -4.3 | 4.4E-08 | 9.4E-07 | -1.9 | 1.1E-03 | 1.7E-02 |
| AT1G05420 | <i>OFFP12</i>    | ovate family protein 12                                                                   | -4.3 | 8.8E-08 | 1.7E-06 | -1.7 | 1.1E-02 | 7.8E-02 |
| AT4G22610 | <i>AT4G22610</i> | Bifunctional inhibitor/lipid-transfer protein/seed storage 2S albumin superfamily protein | -4.3 | 1.0E-04 | 7.1E-04 | 1.4  | 2.7E-01 | 5.4E-01 |
| AT4G11310 | <i>AT4G11310</i> | Papain family cysteine protease                                                           | -4.2 | 7.7E-05 | 5.7E-04 | -2.1 | 9.9E-03 | 7.3E-02 |
| AT2G01610 | <i>AT2G01610</i> | Plant invertase/pectin methylesterase inhibitor superfamily protein                       | -4.2 | 1.2E-03 | 5.6E-03 | -1.2 | 5.2E-01 | 7.5E-01 |
| AT1G45035 | <i>AT1G45035</i> | transposable_element_gene                                                                 | -4.2 | 6.7E-04 | 3.5E-03 | 1.1  | 7.8E-01 | 9.0E-01 |
| AT3G53250 | <i>AT3G53250</i> | SAUR-like auxin-responsive protein family                                                 | -4.2 | 3.2E-09 | 1.0E-07 | -1.7 | 2.3E-03 | 2.8E-02 |
| AT2G41850 | <i>PGAZAT</i>    | polygalacturonase ADPG2-like protein                                                      | -4.2 | 9.7E-04 | 4.8E-03 | -1.3 | 5.2E-01 | 7.5E-01 |
| AT2G43480 | <i>AT2G43480</i> | Peroxidase superfamily protein                                                            | -4.2 | 5.9E-03 | 2.1E-02 | 1.3  | 5.3E-01 | 7.6E-01 |
| AT5G46845 | <i>MIR160C</i>   |                                                                                           | -4.2 | 3.2E-04 | 1.9E-03 | 1.1  | 7.7E-01 | 9.0E-01 |
| AT4G01140 | <i>AT4G01140</i> | transmembrane protein, putative (DUF1191)                                                 | -4.2 | 6.3E-10 | 2.4E-08 | -1.2 | 1.7E-01 | 4.2E-01 |
| AT5G15150 | <i>HB-3</i>      | homeobox 3                                                                                | -4.2 | 5.2E-11 | 2.9E-09 | -1.8 | 1.9E-04 | 5.0E-03 |
| AT4G30290 | <i>XTH19</i>     | xyloglucan endotransglucosylase/hydrolase 19                                              | -4.1 | 1.1E-08 | 2.9E-07 | -1.4 | 8.4E-02 | 2.8E-01 |
| AT2G31083 | <i>CLE5</i>      | CLAVATA3/ESR-RELATED 5                                                                    | -4.1 | 2.4E-07 | 4.1E-06 | 1.1  | 5.9E-01 | 7.9E-01 |
| AT1G51260 | <i>LPAT3</i>     | lysophosphatidyl acyltransferase 3                                                        | -4.1 | 2.8E-04 | 1.7E-03 | 1.1  | 7.2E-01 | 8.8E-01 |
| AT4G03480 | <i>AT4G03480</i> | Ankyrin repeat family protein                                                             | -4.1 | 6.6E-06 | 7.1E-05 | -1.3 | 2.0E-01 | 4.6E-01 |
| AT1G29090 | <i>AT1G29090</i> | Cysteine proteinases superfamily protein                                                  | -4.1 | 1.6E-04 | 1.1E-03 | -1.2 | 5.3E-01 | 7.5E-01 |
| AT1G61480 | <i>AT1G61480</i> | S-locus lectin protein kinase family protein                                              | -4.1 | 4.6E-04 | 2.6E-03 | -1.0 | 9.2E-01 | 9.7E-01 |
| ATCG00630 | <i>PSAJ</i>      | PSAJ                                                                                      | -4.1 | 1.1E-02 | 3.6E-02 | -3.4 | 2.0E-02 | 1.1E-01 |
| AT3G50120 | <i>AT3G50120</i> | transmembrane protein, putative (DUF247)                                                  | -4.0 | 6.7E-09 | 1.9E-07 | -2.0 | 2.2E-04 | 5.7E-03 |
| AT4G22230 | <i>AT4G22230</i> | defensin-like protein                                                                     | -4.0 | 3.8E-05 | 3.1E-04 | 1.3  | 2.9E-01 | 5.6E-01 |
| AT3G27490 | <i>AT3G27490</i> | Cysteine/Histidine-rich C1 domain family protein                                          | -4.0 | 3.5E-03 | 1.4E-02 | -1.3 | 5.1E-01 | 7.4E-01 |
| AT1G48670 | <i>AT1G48670</i> | auxin-responsive GH3 family protein                                                       | -4.0 | 6.4E-05 | 4.9E-04 | -1.2 | 5.6E-01 | 7.8E-01 |
| AT2G33230 | <i>YUCCA 7</i>   | YUCCA 7                                                                                   | -4.0 | 4.6E-03 | 1.7E-02 | -1.5 | 2.9E-01 | 5.6E-01 |
| AT4G21830 | <i>MSTRB7</i>    | methionine sulfoxide reductase B7                                                         | -4.0 | 6.6E-06 | 7.1E-05 | 1.8  | 1.1E-02 | 7.7E-02 |
| ATCG00140 | <i>ATPH</i>      | ATP synthase subunit C family protein                                                     | -4.0 | 8.9E-03 | 3.0E-02 | -2.1 | 1.1E-01 | 3.3E-01 |
| AT2G31540 | <i>AT2G31540</i> | GDSL-like Lipase/Acylhydrolase superfamily protein                                        | -4.0 | 7.8E-05 | 5.7E-04 | 1.6  | 5.9E-02 | 2.2E-01 |
| AT3G24450 | <i>AT3G24450</i> | Heavy metal transport/detoxification superfamily protein                                  | -4.0 | 5.8E-11 | 3.1E-09 | -1.9 | 3.9E-05 | 1.7E-03 |
| AT1G69150 | <i>AT1G69150</i> | Cysteine/Histidine-rich C1 domain family protein                                          | -3.9 | 5.2E-04 | 2.8E-03 | -1.5 | 1.9E-01 | 4.5E-01 |
| AT5G04180 | <i>ACA3</i>      | alpha carbonic anhydrase 3                                                                | -3.9 | 3.1E-04 | 1.8E-03 | -1.1 | 6.9E-01 | 8.6E-01 |
| ATMG01390 | <i>RRN18</i>     |                                                                                           | -3.9 | 6.0E-03 | 2.2E-02 | -3.5 | 1.0E-02 | 7.5E-02 |
| AT5G16170 | <i>AT5G16170</i> | Core-2/I-branching beta-1,6-N-acetylglucosaminyltransferase family protein                | -3.9 | 8.9E-09 | 2.4E-07 | 1.1  | 4.6E-01 | 7.1E-01 |
| AT2G41480 | <i>AT2G41480</i> | peroxidase superfamily protein                                                            | -3.9 | 5.3E-05 | 4.2E-04 | -2.1 | 7.6E-03 | 6.2E-02 |
| AT3G49950 | <i>AT3G49950</i> | GRAS family transcription factor                                                          | -3.8 | 6.3E-04 | 3.3E-03 | -1.5 | 1.8E-01 | 4.3E-01 |
| AT5G23980 | <i>FRO4</i>      | ferric reduction oxidase 4                                                                | -3.8 | 2.0E-03 | 8.8E-03 | -1.2 | 6.8E-01 | 8.5E-01 |
| AT3G50290 | <i>AT3G50290</i> | HXXXD-type acyl-transferase family protein                                                | -3.8 | 1.0E-04 | 7.1E-04 | 1.4  | 1.3E-01 | 3.6E-01 |
| AT2G34390 | <i>NIP2</i>      |                                                                                           | -3.8 | 7.8E-03 | 2.7E-02 | 1.8  | 1.1E-01 | 3.2E-01 |
| AT3G49620 | <i>DIN11</i>     | 2-oxoglutarate (2OG) and Fe(II)-dependent oxygenase superfamily protein                   | -3.8 | 9.7E-05 | 6.9E-04 | -1.0 | 8.6E-01 | 9.5E-01 |
| AT1G09400 | <i>AT1G09400</i> | FMN-linked oxidoreductases superfamily protein                                            | -3.8 | 2.7E-03 | 1.1E-02 | -2.7 | 1.3E-02 | 8.9E-02 |
| AT5G19110 | <i>AT5G19110</i> | Eukaryotic aspartyl protease family protein                                               | -3.8 | 3.6E-03 | 1.4E-02 | 1.6  | 1.4E-01 | 3.8E-01 |
| AT5G14180 | <i>MPL1</i>      | Myzus persicae-induced lipase 1                                                           | -3.8 | 2.5E-11 | 1.5E-09 | -1.5 | 1.9E-03 | 2.4E-02 |
| AT2G22122 | <i>AT2G22122</i> | hypothetical protein                                                                      | -3.7 | 2.7E-10 | 1.2E-08 | -1.0 | 9.4E-01 | 9.8E-01 |
| AT4G12520 | <i>AT4G12520</i> | Bifunctional inhibitor/lipid-transfer protein/seed storage 2S albumin superfamily protein | -3.7 | 1.4E-07 | 2.5E-06 | 1.2  | 4.2E-01 | 6.7E-01 |
| ATMG00880 | <i>ORF187</i>    | hypothetical protein                                                                      | -3.7 | 1.4E-02 | 4.2E-02 | -3.2 | 2.4E-02 | 1.3E-01 |
| AT2G46990 | <i>IAA20</i>     | indole-3-acetic acid inducible 20                                                         | -3.7 | 1.0E-04 | 7.4E-04 | -1.7 | 5.5E-02 | 2.1E-01 |
| AT1G15640 | <i>AT1G15640</i> | transmembrane protein                                                                     | -3.7 | 3.2E-05 | 2.7E-04 | -1.1 | 9.2E-01 | 9.7E-01 |
| AT2G18620 | <i>AT2G18620</i> | Terpenoid synthases superfamily protein                                                   | -3.7 | 1.3E-06 | 1.7E-05 | 1.1  | 6.3E-01 | 8.2E-01 |
| AT5G20710 | <i>BGAL7</i>     | beta-galactosidase 7                                                                      | -3.6 | 4.4E-07 | 7.0E-06 | -1.8 | 4.6E-03 | 4.4E-02 |
| AT5G42380 | <i>CML37</i>     | calmodulin like 37                                                                        | -3.6 | 1.7E-02 | 4.9E-02 | -1.7 | 2.4E-01 | 5.1E-01 |
| AT5G24960 | <i>CYP71A14</i>  | cytochrome P450, family 71, subfamily A, polypeptide 14                                   | -3.6 | 5.0E-04 | 2.7E-03 | 1.3  | 2.8E-01 | 5.4E-01 |
| AT4G37970 | <i>CAD6</i>      | cinnamyl alcohol dehydrogenase 6                                                          | -3.6 | 1.1E-03 | 5.4E-03 | 1.0  | 8.7E-01 | 9.5E-01 |
| AT4G20040 | <i>AT4G20040</i> | Pectin lyase-like superfamily protein                                                     | -3.6 | 1.3E-04 | 8.7E-04 | -1.5 | 1.2E-01 | 3.5E-01 |
| AT1G35250 | <i>AT1G35250</i> | Thioesterase superfamily protein                                                          | -3.6 | 4.6E-05 | 3.7E-04 | -1.8 | 2.2E-02 | 1.2E-01 |
| AT4G26320 | <i>AGP13</i>     | arabinogalactan protein 13                                                                | -3.5 | 9.5E-08 | 1.8E-06 | 1.2  | 1.8E-01 | 4.3E-01 |
| AT4G15290 | <i>ATCSLB05</i>  | Cellulose synthase family protein                                                         | -3.5 | 9.4E-07 | 1.3E-05 | 1.3  | 2.0E-01 | 4.5E-01 |
| AT1G66930 | <i>AT1G66930</i> | Protein kinase superfamily protein                                                        | -3.5 | 2.0E-05 | 1.8E-04 | -1.0 | 8.3E-01 | 9.4E-01 |
| AT5G02580 | <i>AT5G02580</i> | argininosuccinate lyase                                                                   | -3.5 | 4.1E-06 | 4.7E-05 | -1.3 | 1.9E-01 | 4.4E-01 |
| AT5G52790 | <i>AT5G52790</i> | CBS domain protein with a domain protein (DUF21)                                          | -3.5 | 8.2E-09 | 2.2E-07 | -1.1 | 6.8E-01 | 8.5E-01 |
| AT4G11320 | <i>AT4G11320</i> | Papain family cysteine protease                                                           | -3.5 | 2.3E-09 | 7.7E-08 | -1.8 | 2.8E-04 | 6.5E-03 |
| AT5G26070 | <i>AT5G26070</i> | hydroxyproline-rich glycoprotein family protein                                           | -3.5 | 5.0E-03 | 1.8E-02 | 1.1  | 6.7E-01 | 8.5E-01 |
| AT1G43800 | <i>FTM1</i>      | Plant stearyl-acyl-carrier-protein desaturase family protein                              | -3.5 | 1.5E-03 | 6.7E-03 | 1.5  | 2.4E-01 | 5.0E-01 |
| AT3G59730 | <i>AT3G59730</i> | Concanavalin A-like lectin protein kinase family protein                                  | -3.5 | 2.8E-04 | 1.7E-03 | 1.3  | 3.5E-01 | 6.1E-01 |
| AT1G35210 | <i>AT1G35210</i> | hypothetical protein                                                                      | -3.4 | 1.2E-02 | 3.9E-02 | -2.4 | 4.6E-02 | 1.9E-01 |
| AT3G05950 | <i>AT3G05950</i> | RmlC-like cupins superfamily protein                                                      | -3.4 | 4.6E-03 | 1.7E-02 | 1.9  | 6.5E-02 | 2.4E-01 |
| AT1G53830 | <i>PME2</i>      | pectin methylesterase 2                                                                   | -3.4 | 1.8E-12 | 1.5E-10 | 1.1  | 5.7E-01 | 7.9E-01 |
| AT2G35750 | <i>AT2G35750</i> | transmembrane protein                                                                     | -3.4 | 4.6E-05 | 3.7E-04 | -1.6 | 5.6E-02 | 2.2E-01 |
| AT1G66460 | <i>AT1G66460</i> | Protein kinase superfamily protein                                                        | -3.4 | 4.2E-04 | 2.4E-03 | -1.5 | 1.6E-01 | 4.0E-01 |

|           |           |                                                                                   |      |         |         |      |         |         |
|-----------|-----------|-----------------------------------------------------------------------------------|------|---------|---------|------|---------|---------|
| AT1G03820 | AT1G03820 | E6-like protein                                                                   | -3.4 | 6.5E-07 | 9.7E-06 | -1.9 | 1.6E-03 | 2.2E-02 |
| AT4G02290 | GH9B13    | glycosyl hydrolase 9B13                                                           | -3.4 | 3.1E-10 | 1.3E-08 | 1.2  | 1.8E-01 | 4.3E-01 |
| AT2G39370 | MAKR4     | membrane-associated kinase regulator                                              | -3.3 | 1.8E-06 | 2.3E-05 | -1.1 | 4.6E-01 | 7.1E-01 |
| AT1G61840 | AT1G61840 | Cysteine/Histidine-rich C1 domain family protein                                  | -3.3 | 1.8E-05 | 1.6E-04 | 1.2  | 5.0E-01 | 7.3E-01 |
| ATMG01360 | COX1      | cytochrome oxidase                                                                | -3.3 | 1.6E-02 | 4.7E-02 | -3.9 | 7.8E-03 | 6.3E-02 |
| AT2G24300 | AT2G24300 | Calmodulin-binding protein                                                        | -3.3 | 2.1E-10 | 9.4E-09 | -1.3 | 2.4E-02 | 1.3E-01 |
| AT4G08620 | SULTR1    |                                                                                   | -3.3 | 7.8E-05 | 5.7E-04 | 1.1  | 7.7E-01 | 9.0E-01 |
| AT4G15280 | UGT71B5   | UDP-glucosyl transferase 71B5                                                     | -3.3 | 2.1E-03 | 9.2E-03 | 1.7  | 7.4E-02 | 2.6E-01 |
| AT2G17890 | CPK16     | calcium-dependent protein kinase 16                                               | -3.3 | 1.8E-04 | 1.1E-03 | -1.2 | 5.4E-01 | 7.6E-01 |
| AT5G60660 | PIP2      |                                                                                   | -3.3 | 6.7E-09 | 1.9E-07 | 1.0  | 7.8E-01 | 9.1E-01 |
| AT3G05150 | AT3G05150 | Major facilitator superfamily protein                                             | -3.3 | 5.1E-15 | 8.8E-13 | -1.6 | 2.2E-06 | 2.5E-04 |
| AT1G67000 | AT1G67000 | Protein kinase superfamily protein                                                | -3.3 | 7.3E-04 | 3.8E-03 | 1.0  | 8.8E-01 | 9.6E-01 |
| AT1G09860 | PUP16     | purine permease 16                                                                | -3.3 | 2.0E-05 | 1.8E-04 | -1.4 | 1.4E-01 | 3.8E-01 |
| AT5G42580 | CYP705A12 | cytochrome P450, family 705, subfamily A, polypeptide 12                          | -3.3 | 1.2E-05 | 1.2E-04 | 1.5  | 8.8E-02 | 2.9E-01 |
| AT4G27440 | PORB      | protochlorophyllide oxidoreductase B                                              | -3.3 | 5.9E-12 | 4.1E-10 | 1.1  | 5.3E-01 | 7.5E-01 |
| AT5G24100 | AT5G24100 | Leucine-rich repeat protein kinase family protein                                 | -3.3 | 1.3E-09 | 4.6E-08 | 1.3  | 8.4E-02 | 2.8E-01 |
| AT2G37130 | AT2G37130 | Peroxidase superfamily protein                                                    | -3.3 | 1.4E-07 | 2.5E-06 | -1.9 | 8.2E-04 | 1.4E-02 |
| AT4G25560 | LAF1      | myb domain protein 18                                                             | -3.3 | 7.3E-05 | 5.4E-04 | 1.2  | 4.5E-01 | 7.0E-01 |
| AT2G04500 | AT2G04500 | Cysteine/Histidine-rich C1 domain family protein                                  | -3.3 | 2.2E-09 | 7.3E-08 | -1.6 | 8.3E-04 | 1.4E-02 |
| AT3G19430 | AT3G19430 | late embryogenesis abundant protein-related / LEA protein-like protein            | -3.3 | 1.0E-03 | 5.1E-03 | 1.3  | 4.4E-01 | 6.9E-01 |
| AT4G15390 | AT4G15390 | HXXXD-type acyl-transferase family protein                                        | -3.3 | 7.4E-07 | 1.1E-05 | 1.2  | 2.7E-01 | 5.4E-01 |
| AT1G22110 | AT1G22110 | structural constituent of ribosome                                                | -3.2 | 6.3E-08 | 1.3E-06 | -2.0 | 1.4E-04 | 4.1E-03 |
| AT1G63600 | AT1G63600 | Receptor-like protein kinase-related family protein                               | -3.2 | 3.2E-03 | 1.3E-02 | 1.0  | 9.6E-01 | 9.9E-01 |
| AT3G18450 | AT3G18450 | PLAC8 family protein                                                              | -3.2 | 1.2E-02 | 3.9E-02 | 1.2  | 5.6E-01 | 7.7E-01 |
| AT1G49130 | BBX17     | B-box type zinc finger protein with CCT domain-containing protein                 | -3.2 | 3.2E-08 | 7.3E-07 | -1.6 | 3.2E-03 | 3.5E-02 |
| AT4G10270 | AT4G10270 | Wound-responsive family protein                                                   | -3.2 | 5.2E-04 | 2.8E-03 | 1.2  | 4.5E-01 | 7.0E-01 |
| AT5G45210 | AT5G45210 | Disease resistance protein (TIR-NBS-LRR class)                                    | -3.2 | 1.2E-05 | 1.2E-04 | -1.2 | 4.6E-01 | 7.0E-01 |
| AT3G13650 | AT3G13650 | Disease resistance-responsive (dirigent-like protein) family protein              | -3.1 | 4.1E-07 | 6.6E-06 | 1.1  | 5.2E-01 | 7.4E-01 |
| AT1G18140 | LAC1      | laccase 1                                                                         | -3.1 | 1.1E-06 | 1.5E-05 | 1.1  | 5.4E-01 | 7.6E-01 |
| AT5G37450 | AT5G37450 | Leucine-rich repeat protein kinase family protein                                 | -3.1 | 2.2E-03 | 9.4E-03 | -1.4 | 2.9E-01 | 5.6E-01 |
| AT3G32030 | AT3G32030 | Terpenoid cyclases/Protein prenyltransferases superfamily protein                 | -3.1 | 3.2E-05 | 2.7E-04 | 1.2  | 4.8E-01 | 7.2E-01 |
| AT1G61750 | AT1G61750 | Receptor-like protein kinase-related family protein                               | -3.1 | 1.0E-03 | 5.0E-03 | -1.1 | 7.2E-01 | 8.8E-01 |
| AT4G37400 | CYP81F3   | cytochrome P450, family 81, subfamily F, polypeptide 3                            | -3.1 | 3.5E-07 | 5.7E-06 | 1.4  | 2.7E-02 | 1.4E-01 |
| AT5G28650 | WRKY74    | WRKY DNA-binding protein 74                                                       | -3.1 | 2.6E-03 | 1.1E-02 | -1.6 | 1.6E-01 | 4.0E-01 |
| AT1G16160 | WAKL5     | wall associated kinase-like 5                                                     | -3.1 | 4.8E-07 | 7.5E-06 | -1.1 | 5.6E-01 | 7.8E-01 |
| AT5G38100 | AT5G38100 | S-adenosyl-L-methionine-dependent methyltransferases superfamily protein          | -3.1 | 8.6E-05 | 6.2E-04 | 1.1  | 5.8E-01 | 7.9E-01 |
| AT5G53660 | GRF7      | growth-regulating factor 7                                                        | -3.1 | 4.5E-03 | 1.7E-02 | -1.9 | 6.4E-02 | 2.3E-01 |
| AT1G80240 | DGR1      | choice-of-anchor C domain protein, putative (Protein of unknown function, DUF642) | -3.1 | 2.0E-06 | 2.6E-05 | -1.3 | 1.5E-01 | 3.9E-01 |
| AT5G48010 | THAS1     | thalianol synthase 1                                                              | -3.1 | 2.1E-05 | 1.9E-04 | 1.2  | 3.9E-01 | 6.5E-01 |
| AT1G05660 | AT1G05660 | Pectin lyase-like superfamily protein                                             | -3.1 | 1.4E-04 | 9.3E-04 | 1.9  | 8.5E-03 | 6.6E-02 |
| AT5G05965 | AT5G05965 | cell wall RBR3-like protein                                                       | -3.1 | 5.5E-05 | 4.3E-04 | -1.7 | 2.7E-02 | 1.4E-01 |
| AT3G08860 | PYD4      | PYRIMIDINE 4                                                                      | -3.1 | 2.3E-06 | 2.9E-05 | -1.4 | 6.3E-02 | 2.3E-01 |
| AT5G19810 | AT5G19810 | Proline-rich extensin-like family protein                                         | -3.1 | 1.8E-04 | 1.1E-03 | -1.1 | 6.5E-01 | 8.3E-01 |
| AT2G14890 | AGP9      | arabinogalactan protein 9                                                         | -3.1 | 5.7E-11 | 3.1E-09 | -1.5 | 9.8E-04 | 1.6E-02 |
| AT3G12710 | AT3G12710 | DNA glycosylase superfamily protein                                               | -3.0 | 2.8E-10 | 1.2E-08 | -1.7 | 1.8E-04 | 4.9E-03 |
| AT3G63350 | AT-HSFA7B | winged-helix DNA-binding transcription factor family protein                      | -3.0 | 9.3E-04 | 4.6E-03 | -2.0 | 1.8E-02 | 1.1E-01 |
| AT3G50140 | AT3G50140 | transmembrane protein, putative (DUF247)                                          | -3.0 | 1.5E-07 | 2.7E-06 | -1.3 | 1.2E-01 | 3.4E-01 |
| AT1G64405 | AT1G64405 | hypothetical protein                                                              | -3.0 | 1.9E-04 | 1.2E-03 | -1.2 | 5.4E-01 | 7.6E-01 |
| AT2G14210 | AGL44     | AGAMOUS-like 44                                                                   | -3.0 | 4.1E-05 | 3.4E-04 | 1.1  | 7.5E-01 | 8.9E-01 |
| AT5G22570 | WRKY38    | WRKY DNA-binding protein 38                                                       | -3.0 | 6.4E-03 | 2.3E-02 | 1.3  | 3.5E-01 | 6.2E-01 |
| AT3G12610 | DRT100    | Leucine-rich repeat (LRR) family protein                                          | -3.0 | 2.7E-11 | 1.6E-09 | -1.8 | 1.1E-05 | 7.5E-04 |
| AT3G32047 | AT3G32047 | Cytochrome P450 superfamily protein                                               | -3.0 | 1.9E-04 | 1.2E-03 | -1.0 | 9.5E-01 | 9.9E-01 |
| AT5G43690 | AT5G43690 | P-loop containing nucleoside triphosphate hydrolases superfamily protein          | -3.0 | 9.5E-04 | 4.7E-03 | 1.1  | 6.6E-01 | 8.4E-01 |
| AT4G32205 | AT4G32205 | transposable_element_gene                                                         | -3.0 | 2.2E-03 | 9.2E-03 | -1.9 | 3.8E-02 | 1.7E-01 |
| AT3G60160 | ABCC9     | multidrug resistance-associated protein 9                                         | -3.0 | 1.5E-04 | 1.0E-03 | -1.3 | 2.5E-01 | 5.1E-01 |
| AT4G01430 | UMAMIT29  | nodulin MtN21 /EamA-like transporter family                                       | -3.0 | 1.2E-06 | 1.6E-05 | 1.2  | 2.0E-01 | 4.6E-01 |
| AT4G29690 | AT4G29690 | Alkaline-phosphatase-like family protein                                          | -3.0 | 8.0E-04 | 4.1E-03 | 1.9  | 1.6E-02 | 1.0E-01 |
| AT2G31085 | CLE6      | CLAVATA3/ESR-RELATED 6                                                            | -3.0 | 2.9E-04 | 1.7E-03 | 1.2  | 4.3E-01 | 6.8E-01 |
| AT5G06730 | AT5G06730 | Peroxidase superfamily protein                                                    | -3.0 | 6.7E-04 | 3.5E-03 | -1.0 | 9.2E-01 | 9.7E-01 |
| AT4G08112 | AT4G08112 | transposable_element_gene                                                         | -3.0 | 3.3E-03 | 1.3E-02 | -1.4 | 2.5E-01 | 5.2E-01 |
| ATMG00020 | RRN26     |                                                                                   | -3.0 | 8.6E-03 | 2.9E-02 | -2.9 | 1.1E-02 | 8.0E-02 |
| AT4G04710 | CPK22     | calcium-dependent kinase-like protein                                             | -3.0 | 6.3E-05 | 4.8E-04 | -1.9 | 6.4E-03 | 5.5E-02 |
| AT1G12805 | AT1G12805 | nucleotide binding protein                                                        | -3.0 | 6.7E-03 | 2.4E-02 | 1.9  | 4.7E-02 | 2.0E-01 |
| AT2G16980 | AT2G16980 | Major facilitator superfamily protein                                             | -3.0 | 7.3E-08 | 1.5E-06 | 1.2  | 2.8E-01 | 5.5E-01 |
| AT5G15265 | AT5G15265 | transmembrane protein                                                             | -3.0 | 4.7E-06 | 5.3E-05 | -1.5 | 3.5E-02 | 1.6E-01 |
| AT5G23220 | NIC3      | nicotinamidase 3                                                                  | -3.0 | 8.4E-06 | 8.7E-05 | -1.1 | 7.7E-01 | 9.0E-01 |
| AT3G52770 | ZPR3      | binding protein                                                                   | -3.0 | 1.3E-04 | 8.8E-04 | 1.1  | 5.7E-01 | 7.8E-01 |
| AT5G62170 | TRM25     | LOW protein: M-phase inducer phosphatase-like protein                             | -3.0 | 2.0E-08 | 4.8E-07 | -1.5 | 8.6E-03 | 6.7E-02 |
| AT2G37330 | ALS3      | aluminum sensitive 3                                                              | -2.9 | 2.1E-05 | 1.9E-04 | -1.6 | 2.4E-02 | 1.3E-01 |
| AT1G75780 | TUB1      | tubulin beta-1 chain                                                              | -2.9 | 5.0E-09 | 1.5E-07 | 1.1  | 3.6E-01 | 6.2E-01 |
| AT1G07690 | AT1G07690 | transmembrane protein                                                             | -2.9 | 4.5E-03 | 1.7E-02 | 1.0  | 9.9E-01 | 1.0E+00 |

|           |           |                                                                                                 |      |         |         |      |         |         |
|-----------|-----------|-------------------------------------------------------------------------------------------------|------|---------|---------|------|---------|---------|
| AT2G18180 | AT2G18180 | Sec14p-like phosphatidylinositol transfer family protein                                        | -2.9 | 1.8E-03 | 8.0E-03 | -1.9 | 4.1E-02 | 1.8E-01 |
| AT1G02575 | AT1G02575 | transmembrane protein                                                                           | -2.9 | 8.0E-03 | 2.7E-02 | 1.2  | 5.6E-01 | 7.8E-01 |
| AT1G61160 | AT1G61160 | retrotransposon gag                                                                             | -2.9 | 8.1E-05 | 5.9E-04 | -1.1 | 6.9E-01 | 8.6E-01 |
| AT3G06435 | AT3G06435 | Expressed protein                                                                               | -2.9 | 9.8E-05 | 6.9E-04 | 1.0  | 8.7E-01 | 9.5E-01 |
| AT2G35743 | AT2G35743 |                                                                                                 | -2.9 | 1.5E-02 | 4.6E-02 | -3.4 | 6.7E-03 | 5.6E-02 |
| AT3G45130 | LAS1      | lanosterol synthase 1                                                                           | -2.9 | 5.9E-04 | 3.1E-03 | -1.1 | 7.2E-01 | 8.7E-01 |
| AT3G48490 | AT3G48490 | hypothetical protein                                                                            | -2.9 | 1.6E-05 | 1.5E-04 | -1.4 | 6.4E-02 | 2.3E-01 |
| AT2G26370 | AT2G26370 | MD-2-related lipid recognition domain-containing protein                                        | -2.9 | 4.1E-06 | 4.7E-05 | 1.2  | 3.3E-01 | 6.0E-01 |
| AT2G14960 | GH3.1     | Auxin-responsive GH3 family protein                                                             | -2.9 | 9.2E-04 | 4.6E-03 | 1.1  | 7.2E-01 | 8.7E-01 |
| AT5G01335 | AT5G01335 | transposable_element_gene                                                                       | -2.9 | 9.4E-03 | 3.1E-02 | -1.0 | 9.6E-01 | 9.9E-01 |
| AT2G34700 | AT2G34700 | Pollen Ole e 1 allergen and extensin family protein                                             | -2.9 | 3.6E-03 | 1.4E-02 | -2.6 | 7.8E-03 | 6.2E-02 |
| AT4G37870 | PCK1      | phosphoenolpyruvate carboxykinase 1                                                             | -2.9 | 1.1E-10 | 5.6E-09 | -1.2 | 1.9E-01 | 4.4E-01 |
| AT5G47450 | TIP2      |                                                                                                 | -2.9 | 9.7E-07 | 1.4E-05 | -1.1 | 5.8E-01 | 7.9E-01 |
| AT5G18840 | AT5G18840 | Major facilitator superfamily protein                                                           | -2.9 | 4.0E-03 | 1.5E-02 | -1.3 | 4.3E-01 | 6.8E-01 |
| AT1G20190 | EXPA11    | expansin 11                                                                                     | -2.9 | 5.2E-07 | 8.0E-06 | -1.8 | 7.9E-04 | 1.4E-02 |
| AT3G01516 | AT3G01516 | transmembrane protein                                                                           | -2.9 | 2.1E-03 | 9.1E-03 | -1.0 | 8.6E-01 | 9.5E-01 |
| AT2G39920 | AT2G39920 | HAD superfamily, subfamily IIIB acid phosphatase                                                | -2.8 | 1.1E-02 | 3.5E-02 | -1.1 | 7.7E-01 | 9.0E-01 |
| AT1G77640 | AT1G77640 | Integrase-type DNA-binding superfamily protein                                                  | -2.8 | 5.1E-04 | 2.8E-03 | -1.7 | 5.0E-02 | 2.0E-01 |
| AT3G21620 | AT3G21620 | ERD (early-responsive to dehydration stress) family protein                                     | -2.8 | 1.3E-06 | 1.8E-05 | 1.0  | 9.9E-01 | 1.0E+00 |
| AT1G80160 | GLY17     | Lactoylglutathione lyase / glyoxalase I family                                                  | -2.8 | 1.2E-03 | 5.5E-03 | 1.4  | 2.2E-01 | 4.7E-01 |
| AT3G59130 | AT3G59130 | Cysteine/Histidine-rich C1 domain family protein                                                | -2.8 | 2.1E-04 | 1.3E-03 | 1.4  | 1.3E-01 | 3.6E-01 |
| AT3G20130 | CYP705A22 | cytochrome P450, family 705, subfamily A, polypeptide 22                                        | -2.8 | 6.9E-15 | 1.1E-12 | -1.1 | 3.5E-01 | 6.2E-01 |
| AT2G45050 | GATA2     | GATA transcription factor 2                                                                     | -2.8 | 3.1E-09 | 9.7E-08 | 1.0  | 9.4E-01 | 9.8E-01 |
| AT3G28580 | AT3G28580 | P-loop containing nucleoside triphosphate hydrolases superfamily protein                        | -2.8 | 9.8E-03 | 3.2E-02 | -2.7 | 9.8E-03 | 7.3E-02 |
| AT5G46330 | FLS2      | Leucine-rich receptor-like protein kinase family protein                                        | -2.8 | 8.9E-08 | 1.7E-06 | -1.3 | 1.0E-01 | 3.1E-01 |
| AT5G48000 | CYP708A2  | cytochrome P450, family 708, subfamily A, polypeptide 2                                         | -2.8 | 2.9E-06 | 3.6E-05 | 1.1  | 6.5E-01 | 8.4E-01 |
| AT2G21880 | RAB7A     | RAB GTPase homolog 7A                                                                           | -2.8 | 3.6E-08 | 7.9E-07 | -1.5 | 4.7E-03 | 4.5E-02 |
| AT5G26320 | AT5G26320 | TRAF-like family protein                                                                        | -2.8 | 1.9E-03 | 8.2E-03 | 1.4  | 2.2E-01 | 4.8E-01 |
| AT2G48080 | AT2G48080 | oxidoreductase, 2OG-Fe(II) oxygenase family                                                     | -2.8 | 3.6E-07 | 5.8E-06 | 1.2  | 1.6E-01 | 4.0E-01 |
| AT3G02550 | LBD41     | LOB domain-containing protein 41                                                                | -2.8 | 4.7E-05 | 3.8E-04 | -1.1 | 7.1E-01 | 8.7E-01 |
| AT4G01200 | AT4G01200 | Calcium-dependent lipid-binding (CaLB domain) family protein                                    | -2.8 | 9.6E-08 | 1.8E-06 | -1.7 | 7.9E-04 | 1.4E-02 |
| AT1G78860 | AT1G78860 | D-mannose binding lectin protein with Apple-like carbohydrate-binding domain-containing protein | -2.8 | 2.4E-04 | 1.5E-03 | -1.3 | 2.4E-01 | 5.0E-01 |
| AT5G57190 | PSD2      | phosphatidylserine decarboxylase 2                                                              | -2.8 | 8.2E-06 | 8.5E-05 | 1.1  | 6.2E-01 | 8.2E-01 |
| AT1G44800 | SIAR1     | nodulin MtN21 /EamA-like transporter family                                                     | -2.8 | 4.6E-14 | 5.9E-12 | 1.0  | 9.3E-01 | 9.8E-01 |
| AT1G66800 | AT1G66800 | NAD(P)-binding Rossmann-fold superfamily protein                                                | -2.8 | 3.7E-06 | 4.3E-05 | 1.1  | 4.3E-01 | 6.8E-01 |
| AT3G22740 | HMT3      | homocysteine S-methyltransferase 3                                                              | -2.8 | 5.0E-04 | 2.8E-03 | 1.1  | 7.2E-01 | 8.8E-01 |
| AT4G33880 | RSL2      | ROOT HAIR DEFECTIVE 6-LIKE 2                                                                    | -2.8 | 9.4E-06 | 9.5E-05 | 1.5  | 2.8E-02 | 1.4E-01 |
| AT4G10780 | AT4G10780 | LRR and NB-ARC domains-containing disease resistance protein                                    | -2.8 | 5.2E-03 | 1.9E-02 | 1.1  | 6.2E-01 | 8.2E-01 |
| AT3G16410 | NSP4      | nitrile specifier protein 4                                                                     | -2.8 | 1.5E-05 | 1.4E-04 | 1.9  | 1.5E-03 | 2.1E-02 |
| AT2G23400 | AT2G23400 | Undecaprenyl pyrophosphate synthetase family protein                                            | -2.8 | 9.8E-03 | 3.2E-02 | 1.8  | 4.6E-02 | 1.9E-01 |
| AT4G26488 | AT4G26488 | Natural antisense transcript overlaps with AT4G26490                                            | -2.7 | 1.6E-06 | 2.1E-05 | -1.7 | 4.1E-03 | 4.1E-02 |
| AT5G62420 | AT5G62420 | NAD(P)-linked oxidoreductase superfamily protein                                                | -2.7 | 1.4E-05 | 1.3E-04 | 1.2  | 2.1E-01 | 4.7E-01 |
| AT5G02020 | SIS       | E3 ubiquitin-protein ligase RLIM-like protein                                                   | -2.7 | 1.4E-09 | 5.0E-08 | -1.5 | 2.1E-03 | 2.6E-02 |
| AT3G32040 | AT3G32040 | Terpenoid synthases superfamily protein                                                         | -2.7 | 1.1E-03 | 5.3E-03 | -1.0 | 9.9E-01 | 1.0E+00 |
| AT3G46170 | AT3G46170 | NAD(P)-binding Rossmann-fold superfamily protein                                                | -2.7 | 4.3E-03 | 1.6E-02 | 1.2  | 5.0E-01 | 7.3E-01 |
| AT3G06990 | AT3G06990 | Cysteine/Histidine-rich C1 domain family protein                                                | -2.7 | 8.2E-09 | 2.2E-07 | -2.0 | 5.4E-06 | 4.6E-04 |
| AT5G14340 | MYB40     | myb domain protein 40                                                                           | -2.7 | 2.5E-03 | 1.0E-02 | 1.3  | 3.3E-01 | 6.0E-01 |
| AT4G23870 | AT4G23870 | hypothetical protein                                                                            | -2.7 | 1.2E-05 | 1.2E-04 | -1.9 | 1.4E-03 | 2.0E-02 |
| AT3G45700 | AT3G45700 | Major facilitator superfamily protein                                                           | -2.7 | 4.9E-11 | 2.7E-09 | 1.0  | 6.7E-01 | 8.5E-01 |
| AT1G64640 | ENODL8    | early nodulin-like protein 8                                                                    | -2.7 | 6.8E-09 | 1.9E-07 | -1.7 | 2.4E-04 | 6.0E-03 |
| AT3G16390 | NSP3      | nitrile specifier protein 3                                                                     | -2.7 | 2.8E-04 | 1.7E-03 | 1.4  | 1.0E-01 | 3.1E-01 |
| AT5G51190 | AT5G51190 | Integrase-type DNA-binding superfamily protein                                                  | -2.7 | 1.2E-02 | 3.9E-02 | -1.8 | 1.2E-01 | 3.3E-01 |
| AT4G24110 | AT4G24110 | NADP-specific glutamate dehydrogenase                                                           | -2.7 | 3.6E-05 | 3.0E-04 | 1.3  | 2.2E-01 | 4.8E-01 |
| AT1G77870 | MUB5      | membrane-anchored ubiquitin-fold protein 5 precursor                                            | -2.7 | 6.0E-06 | 6.5E-05 | -1.4 | 3.4E-02 | 1.6E-01 |
| AT1G75590 | AT1G75590 | SAUR-like auxin-responsive protein family                                                       | -2.7 | 4.8E-05 | 3.8E-04 | -1.8 | 5.7E-03 | 5.1E-02 |
| AT5G61520 | AT5G61520 | Major facilitator superfamily protein                                                           | -2.7 | 5.4E-08 | 1.1E-06 | 1.2  | 1.2E-01 | 3.3E-01 |
| AT4G24275 | AT4G24275 | hypothetical protein                                                                            | -2.7 | 3.4E-08 | 7.6E-07 | -1.4 | 1.1E-02 | 8.0E-02 |
| AT5G15580 | LNG1      | longifolia1                                                                                     | -2.7 | 1.2E-09 | 4.5E-08 | -1.7 | 8.0E-05 | 2.8E-03 |
| AT1G19840 | AT1G19840 | SAUR-like auxin-responsive protein family                                                       | -2.7 | 3.0E-08 | 6.9E-07 | 1.0  | 9.8E-01 | 1.0E+00 |
| AT1G74670 | GASA6     | Gibberellin-regulated family protein                                                            | -2.7 | 5.6E-10 | 2.2E-08 | 1.0  | 8.6E-01 | 9.5E-01 |
| AT3G27884 | AT3G27884 |                                                                                                 | -2.6 | 1.8E-04 | 1.2E-03 | 1.2  | 3.8E-01 | 6.4E-01 |
| AT1G25425 | CLE43     | CLAVATA3/ESR-RELATED 43                                                                         | -2.6 | 7.7E-05 | 5.6E-04 | -1.6 | 2.5E-02 | 1.3E-01 |
| AT1G54660 | AT1G54660 | pseudogene of terpene synthase 21                                                               | -2.6 | 6.6E-04 | 3.5E-03 | -1.1 | 7.7E-01 | 9.0E-01 |
| AT4G01410 | AT4G01410 | Late embryogenesis abundant (LEA) hydroxyproline-rich glycoprotein family                       | -2.6 | 3.8E-09 | 1.2E-07 | -1.5 | 2.1E-03 | 2.7E-02 |
| AT4G36110 | SAUR9     | SAUR-like auxin-responsive protein family                                                       | -2.6 | 2.6E-03 | 1.1E-02 | -1.7 | 6.0E-02 | 2.3E-01 |
| AT1G15210 | ABCG35    | pleiotropic drug resistance 7                                                                   | -2.6 | 1.7E-09 | 5.8E-08 | 1.3  | 2.7E-02 | 1.4E-01 |
| AT2G23620 | MES1      | methyl esterase 1                                                                               | -2.6 | 1.2E-05 | 1.1E-04 | 1.0  | 9.5E-01 | 9.8E-01 |
| AT1G77131 | AT1G77131 | pseudogene of plant glycogenin-like starch initiation protein 2                                 | -2.6 | 6.5E-03 | 2.3E-02 | 1.1  | 7.2E-01 | 8.7E-01 |

|           |                  |                                                                            |      |         |         |      |         |         |
|-----------|------------------|----------------------------------------------------------------------------|------|---------|---------|------|---------|---------|
| AT1G80280 | <i>AT1G80280</i> | alpha/beta-Hydrolases superfamily protein                                  | -2.6 | 6.0E-14 | 7.4E-12 | -1.9 | 9.0E-10 | 1.4E-06 |
| AT2G31900 | <i>XIF</i>       | myosin-like protein XIF                                                    | -2.6 | 1.0E-12 | 9.0E-11 | -1.6 | 3.3E-06 | 3.2E-04 |
| AT1G19960 | <i>AT1G19960</i> | transcription factor                                                       | -2.6 | 1.5E-03 | 6.7E-03 | 1.5  | 9.8E-02 | 3.0E-01 |
| AT1G08590 | <i>AT1G08590</i> | Leucine-rich receptor-like protein kinase family protein                   | -2.6 | 3.2E-12 | 2.5E-10 | 1.1  | 3.8E-01 | 6.4E-01 |
| AT1G71692 | <i>AGL12</i>     | AGAMOUS-like 12                                                            | -2.6 | 1.8E-06 | 2.4E-05 | 1.5  | 1.7E-02 | 1.0E-01 |
| AT1G67110 | <i>CYP735A2</i>  | cytochrome P450, family 735, subfamily A, polypeptide 2                    | -2.6 | 2.6E-04 | 1.6E-03 | 1.1  | 7.9E-01 | 9.1E-01 |
| AT5G42500 | <i>AT5G42500</i> | Disease resistance-responsive (dirigent-like protein) family protein       | -2.6 | 8.9E-06 | 9.1E-05 | 1.1  | 4.6E-01 | 7.1E-01 |
| AT4G17490 | <i>ERF6</i>      | ethylene responsive element binding factor 6                               | -2.6 | 2.5E-05 | 2.2E-04 | -1.2 | 3.9E-01 | 6.5E-01 |
| AT3G60390 | <i>HAT3</i>      | homeobox-leucine zipper protein 3                                          | -2.6 | 1.6E-07 | 2.9E-06 | -1.7 | 4.8E-04 | 9.5E-03 |
| AT1G30370 | <i>DLAH</i>      | alpha/beta-Hydrolases superfamily protein                                  | -2.6 | 7.6E-04 | 3.9E-03 | 1.1  | 6.7E-01 | 8.4E-01 |
| AT3G07010 | <i>AT3G07010</i> | Pectin lyase-like superfamily protein                                      | -2.6 | 5.7E-13 | 5.6E-11 | -1.5 | 1.5E-05 | 9.2E-04 |
| AT2G04090 | <i>AT2G04090</i> | MATE efflux family protein                                                 | -2.6 | 1.9E-05 | 1.7E-04 | -1.1 | 5.2E-01 | 7.4E-01 |
| AT3G06460 | <i>AT3G06460</i> | GNS1/SUR4 membrane protein family                                          | -2.6 | 7.3E-03 | 2.5E-02 | -1.0 | 1.0E+00 | 1.0E+00 |
| AT2G16970 | <i>MEE15</i>     | Major facilitator superfamily protein                                      | -2.6 | 1.4E-04 | 9.4E-04 | 1.2  | 4.3E-01 | 6.8E-01 |
| AT4G01390 | <i>AT4G01390</i> | TRAF-like family protein                                                   | -2.6 | 6.1E-03 | 2.2E-02 | -1.2 | 5.4E-01 | 7.7E-01 |
| AT5G60520 | <i>AT5G60520</i> | Late embryogenesis abundant (LEA) protein-like protein                     | -2.6 | 1.3E-02 | 3.9E-02 | 1.6  | 1.3E-01 | 3.5E-01 |
| AT4G15270 | <i>AT4G15270</i> | glucosyltransferase-like protein                                           | -2.6 | 4.7E-03 | 1.8E-02 | 1.1  | 6.5E-01 | 8.3E-01 |
| AT3G54400 | <i>AT3G54400</i> | Eukaryotic aspartyl protease family protein                                | -2.6 | 6.1E-11 | 3.2E-09 | -1.4 | 1.1E-03 | 1.7E-02 |
| AT4G39410 | <i>WRKY13</i>    | WRKY DNA-binding protein 13                                                | -2.6 | 8.8E-04 | 4.4E-03 | 1.0  | 8.3E-01 | 9.4E-01 |
| AT4G11210 | <i>AT4G11210</i> | Disease resistance-responsive (dirigent-like protein) family protein       | -2.6 | 3.2E-06 | 3.9E-05 | -1.3 | 1.2E-01 | 3.4E-01 |
| AT1G31320 | <i>LBD4</i>      | LOB domain-containing protein 4                                            | -2.6 | 5.7E-05 | 4.4E-04 | -1.2 | 2.8E-01 | 5.4E-01 |
| AT1G66450 | <i>AT1G66450</i> | Cysteine/Histidine-rich C1 domain family protein                           | -2.6 | 2.3E-05 | 2.1E-04 | -1.6 | 1.7E-02 | 1.0E-01 |
| AT4G13840 | <i>AT4G13840</i> | HXXXD-type acyl-transferase family protein                                 | -2.6 | 1.4E-07 | 2.6E-06 | 1.2  | 2.4E-01 | 5.0E-01 |
| AT5G24070 | <i>AT5G24070</i> | Peroxidase superfamily protein                                             | -2.6 | 4.1E-03 | 1.6E-02 | 1.1  | 7.1E-01 | 8.7E-01 |
| AT1G01110 | <i>IQD18</i>     | IQ-domain 18                                                               | -2.5 | 4.2E-06 | 4.8E-05 | -1.3 | 1.1E-01 | 3.3E-01 |
| AT1G68330 | <i>AT1G68330</i> | membrane-associated kinase regulator                                       | -2.5 | 2.2E-07 | 3.8E-06 | -1.3 | 8.2E-02 | 2.7E-01 |
| AT4G27480 | <i>AT4G27480</i> | Core-2/l-branching beta-1,6-N-acetylglucosaminyltransferase family protein | -2.5 | 9.5E-06 | 9.6E-05 | 1.1  | 5.4E-01 | 7.7E-01 |
| AT1G13280 | <i>AOC4</i>      | allene oxide cyclase 4                                                     | -2.5 | 8.4E-12 | 5.6E-10 | -1.0 | 8.4E-01 | 9.4E-01 |
| AT3G28180 | <i>CSLC04</i>    | Cellulose-synthase-like C4                                                 | -2.5 | 1.6E-10 | 7.4E-09 | -1.8 | 1.7E-06 | 2.0E-04 |
| AT1G13430 | <i>ST4C</i>      | sulfotransferase 4C                                                        | -2.5 | 6.9E-04 | 3.6E-03 | -1.7 | 3.8E-02 | 1.7E-01 |
| AT3G50280 | <i>AT3G50280</i> | HXXXD-type acyl-transferase family protein                                 | -2.5 | 1.7E-04 | 1.1E-03 | -1.1 | 5.7E-01 | 7.8E-01 |
| AT4G34800 | <i>AT4G34800</i> | SAUR-like auxin-responsive protein family                                  | -2.5 | 7.8E-06 | 8.1E-05 | 1.0  | 7.8E-01 | 9.1E-01 |
| AT2G23060 | <i>AT2G23060</i> | Acyl-CoA N-acyltransferases (NAT) superfamily protein                      | -2.5 | 1.4E-02 | 4.3E-02 | -1.1 | 8.1E-01 | 9.2E-01 |
| AT4G12550 | <i>AIR1</i>      | Auxin-induced in Root cultures 1                                           | -2.5 | 5.8E-03 | 2.1E-02 | 1.6  | 1.4E-01 | 3.7E-01 |
| AT5G04970 | <i>AT5G04970</i> | Plant invertase/pectin methylesterase inhibitor superfamily                | -2.5 | 1.3E-03 | 6.1E-03 | 1.1  | 5.7E-01 | 7.8E-01 |
| AT3G54770 | <i>ARP1</i>      | RNA-binding (RRM/RBD/RNP motifs) family protein                            | -2.5 | 6.5E-07 | 9.7E-06 | 1.1  | 5.9E-01 | 7.9E-01 |
| AT5G20550 | <i>AT5G20550</i> | 2-oxoglutarate (2OG) and Fe(II)-dependent oxygenase superfamily protein    | -2.5 | 1.3E-05 | 1.2E-04 | 1.2  | 2.3E-01 | 5.0E-01 |
| AT5G66330 | <i>AT5G66330</i> | Leucine-rich repeat (LRR) family protein                                   | -2.5 | 1.8E-06 | 2.4E-05 | -1.8 | 7.2E-04 | 1.3E-02 |
| AT1G02570 | <i>AT1G02570</i> | transmembrane protein                                                      | -2.5 | 8.6E-04 | 4.3E-03 | 1.4  | 1.7E-01 | 4.2E-01 |
| AT4G29700 | <i>AT4G29700</i> | Alkaline-phosphatase-like family protein                                   | -2.5 | 5.2E-06 | 5.8E-05 | -1.6 | 5.4E-03 | 4.9E-02 |
| AT4G19030 | <i>NLM1</i>      | NOD26-like major intrinsic protein 1                                       | -2.5 | 1.6E-06 | 2.2E-05 | 1.5  | 1.6E-02 | 1.0E-01 |
| AT1G29025 | <i>AT1G29025</i> | Calcium-binding EF-hand family protein                                     | -2.5 | 3.6E-04 | 2.1E-03 | 1.1  | 5.6E-01 | 7.8E-01 |
| AT2G19990 | <i>PR-1-LIKE</i> | pathogenesis-related protein-1-like protein                                | -2.5 | 1.9E-03 | 8.3E-03 | -1.3 | 3.3E-01 | 6.0E-01 |
| AT1G65970 | <i>TPX2</i>      | thioredoxin-dependent peroxidase 2                                         | -2.5 | 2.9E-04 | 1.7E-03 | 1.1  | 7.2E-01 | 8.7E-01 |
| AT2G42870 | <i>PAR1</i>      | phy rapidly regulated 1                                                    | -2.5 | 8.3E-08 | 1.6E-06 | -1.2 | 9.8E-02 | 3.0E-01 |
| AT5G15230 | <i>GASA4</i>     | GAST1 protein homolog 4                                                    | -2.5 | 8.4E-10 | 3.1E-08 | 1.2  | 1.0E-01 | 3.1E-01 |
| AT3G12820 | <i>MYB10</i>     | myb domain protein 10                                                      | -2.5 | 5.5E-03 | 2.0E-02 | -1.8 | 4.6E-02 | 1.9E-01 |
| AT4G36930 | <i>SPT</i>       | basic helix-loop-helix (bHLH) DNA-binding superfamily protein              | -2.5 | 1.0E-09 | 3.7E-08 | -1.0 | 6.5E-01 | 8.3E-01 |
| AT2G35270 | <i>GIK</i>       | Putative AT-hook DNA-binding family protein                                | -2.5 | 1.0E-06 | 1.4E-05 | 1.1  | 6.1E-01 | 8.1E-01 |
| AT5G15160 | <i>BNQ2</i>      | BANQUO 2                                                                   | -2.5 | 1.3E-03 | 6.0E-03 | -1.8 | 2.4E-02 | 1.3E-01 |
| AT3G63470 | <i>scpl40</i>    | serine carboxypeptidase-like 40                                            | -2.5 | 6.7E-09 | 1.9E-07 | -1.3 | 2.5E-02 | 1.3E-01 |
| AT5G26147 | <i>MIR156F</i>   |                                                                            | -2.5 | 4.3E-03 | 1.6E-02 | 1.0  | 9.6E-01 | 9.9E-01 |
| AT1G35625 | <i>AT1G35625</i> | RING/U-box superfamily protein                                             | -2.5 | 2.6E-03 | 1.1E-02 | 1.2  | 4.3E-01 | 6.8E-01 |
| AT5G09970 | <i>CYP78A7</i>   | cytochrome P450, family 78, subfamily A, polypeptide 7                     | -2.5 | 4.1E-03 | 1.6E-02 | -1.3 | 2.8E-01 | 5.5E-01 |
| AT5G42930 | <i>AT5G42930</i> | alpha/beta-Hydrolases superfamily protein                                  | -2.5 | 9.9E-06 | 1.0E-04 | 1.1  | 5.6E-01 | 7.8E-01 |
| AT1G77120 | <i>ADH1</i>      | alcohol dehydrogenase 1                                                    | -2.5 | 4.7E-04 | 2.6E-03 | 1.1  | 5.3E-01 | 7.6E-01 |
| AT3G26610 | <i>AT3G26610</i> | Pectin lyase-like superfamily protein                                      | -2.5 | 2.0E-06 | 2.6E-05 | 1.2  | 1.4E-01 | 3.8E-01 |
| AT2G42060 | <i>AT2G42060</i> | Cysteine/Histidine-rich C1 domain family protein                           | -2.4 | 1.8E-04 | 1.1E-03 | -1.2 | 2.9E-01 | 5.6E-01 |
| AT5G03150 | <i>JKD</i>       | C2H2-like zinc finger protein                                              | -2.4 | 4.6E-09 | 1.4E-07 | -1.9 | 1.7E-06 | 2.1E-04 |
| AT2G22500 | <i>UCP5</i>      | uncoupling protein 5                                                       | -2.4 | 1.0E-05 | 1.0E-04 | -1.6 | 1.1E-02 | 7.6E-02 |
| AT1G24320 | <i>AT1G24320</i> | Six-hairpin glycosidases superfamily protein                               | -2.4 | 5.1E-07 | 7.9E-06 | 1.0  | 8.7E-01 | 9.5E-01 |
| AT4G30110 | <i>HMA2</i>      | heavy metal atpase 2                                                       | -2.4 | 3.1E-05 | 2.7E-04 | 1.1  | 6.5E-01 | 8.3E-01 |
| AT4G04745 | <i>AT4G04745</i> | hypothetical protein                                                       | -2.4 | 8.7E-06 | 9.0E-05 | 1.0  | 9.8E-01 | 1.0E+00 |
| AT1G25230 | <i>AT1G25230</i> | Calcineurin-like metallo-phosphoesterase superfamily protein               | -2.4 | 1.9E-12 | 1.6E-10 | -1.6 | 9.7E-07 | 1.4E-04 |
| AT2G39040 | <i>AT2G39040</i> | Peroxidase superfamily protein                                             | -2.4 | 3.1E-05 | 2.6E-04 | 1.5  | 3.3E-02 | 1.6E-01 |
| AT1G14390 | <i>AT1G14390</i> | Leucine-rich repeat protein kinase family protein                          | -2.4 | 6.0E-06 | 6.5E-05 | 1.2  | 3.3E-01 | 6.0E-01 |
| AT4G34880 | <i>AT4G34880</i> | Amidase family protein                                                     | -2.4 | 1.4E-05 | 1.3E-04 | 1.2  | 3.4E-01 | 6.1E-01 |
| AT5G23870 | <i>AT5G23870</i> | Pectinacetyltransferase family protein                                     | -2.4 | 2.1E-08 | 5.1E-07 | -1.6 | 4.1E-04 | 8.6E-03 |
| AT3G52561 | <i>AT3G52561</i> | hypothetical protein                                                       | -2.4 | 2.9E-03 | 1.2E-02 | -1.2 | 5.1E-01 | 7.4E-01 |
| AT1G55120 | <i>FRUCT5</i>    | beta-fructofuranosidase 5                                                  | -2.4 | 4.7E-12 | 3.4E-10 | -2.0 | 1.7E-09 | 1.9E-06 |
| AT4G31370 | <i>FLA5</i>      | FASCICLIN-like arabinogalactan protein 5 precursor                         | -2.4 | 7.0E-03 | 2.4E-02 | -1.3 | 3.0E-01 | 5.6E-01 |



|           |                  |                                                                                |      |         |         |      |         |         |
|-----------|------------------|--------------------------------------------------------------------------------|------|---------|---------|------|---------|---------|
| AT5G11540 | <i>GulLO3</i>    | D-arabinono-1,4-lactone oxidase family protein                                 | -2.4 | 4.0E-07 | 6.4E-06 | -1.8 | 1.8E-04 | 4.9E-03 |
| AT3G45095 | <i>AT3G45095</i> | transposable_element_gene                                                      | -2.4 | 1.3E-03 | 6.0E-03 | -1.2 | 4.2E-01 | 6.7E-01 |
| AT2G21200 | <i>AT2G21200</i> | SAUR-like auxin-responsive protein family                                      | -2.4 | 7.8E-04 | 4.0E-03 | -1.7 | 2.3E-02 | 1.3E-01 |
| AT4G23130 | <i>CRK5</i>      | cysteine-rich RLK (RECEPTOR-like protein kinase) 5                             | -2.4 | 1.4E-02 | 4.1E-02 | 1.5  | 1.8E-01 | 4.3E-01 |
| AT3G20850 | <i>AT3G20850</i> | proline-rich family protein                                                    | -2.4 | 1.6E-02 | 4.7E-02 | -1.0 | 9.6E-01 | 9.9E-01 |
| AT1G44160 | <i>AT1G44160</i> | HSP40/DnaJ peptide-binding protein                                             | -2.4 | 9.6E-06 | 9.7E-05 | -1.1 | 4.7E-01 | 7.1E-01 |
| AT5G54370 | <i>AT5G54370</i> | Late embryogenesis abundant (LEA) protein-like protein                         | -2.4 | 4.0E-03 | 1.5E-02 | 1.3  | 3.0E-01 | 5.6E-01 |
| AT3G21755 | <i>AT3G21755</i> | Natural antisense transcript overlaps with AT3G21760                           | -2.4 | 6.2E-05 | 4.7E-04 | -1.0 | 8.9E-01 | 9.6E-01 |
| AT4G13860 | <i>AT4G13860</i> | RNA-binding (RRM/RBD/RNP motifs) family protein                                | -2.4 | 5.7E-05 | 4.4E-04 | 1.1  | 4.9E-01 | 7.3E-01 |
| AT3G25905 | <i>CLE27</i>     | CLAVATA3/ESR-RELATED 27                                                        | -2.4 | 2.1E-03 | 9.0E-03 | -1.4 | 1.9E-01 | 4.5E-01 |
| AT5G63600 | <i>FLS5</i>      | flavonol synthase 5                                                            | -2.4 | 9.8E-06 | 9.8E-05 | 1.2  | 3.6E-01 | 6.2E-01 |
| AT4G12050 | <i>AT4G12050</i> | Putative AT-hook DNA-binding family protein                                    | -2.4 | 6.6E-06 | 7.1E-05 | 1.2  | 2.6E-01 | 5.2E-01 |
| AT3G04181 | <i>AT3G04181</i> | hypothetical protein                                                           | -2.4 | 1.6E-02 | 4.8E-02 | -1.1 | 7.8E-01 | 9.1E-01 |
| AT5G14920 | <i>AT5G14920</i> | Gibberellin-regulated family protein                                           | -2.4 | 2.6E-05 | 2.2E-04 | -1.8 | 1.9E-03 | 2.5E-02 |
| AT4G31910 | <i>BAT1</i>      | HXXXD-type acyl-transferase family protein                                     | -2.4 | 3.0E-12 | 2.3E-10 | -1.2 | 7.2E-02 | 2.5E-01 |
| AT1G12110 | <i>NRT1.1</i>    | nitrate transporter 1.1                                                        | -2.4 | 1.5E-10 | 7.0E-09 | -1.3 | 3.8E-03 | 3.9E-02 |
| AT2G38750 | <i>ANNAT4</i>    | annexin 4                                                                      | -2.4 | 4.4E-06 | 5.0E-05 | -1.1 | 6.9E-01 | 8.6E-01 |
| AT3G59850 | <i>AT3G59850</i> | Pectin lyase-like superfamily protein                                          | -2.4 | 4.9E-03 | 1.8E-02 | 1.3  | 3.6E-01 | 6.2E-01 |
| AT5G39190 | <i>GER2</i>      | germin-like protein 2                                                          | -2.4 | 7.6E-03 | 2.6E-02 | -1.6 | 1.0E-01 | 3.1E-01 |
| AT5G49560 | <i>AT5G49560</i> | Putative methyltransferase family protein                                      | -2.4 | 4.0E-04 | 2.3E-03 | 1.2  | 4.1E-01 | 6.7E-01 |
| AT3G49580 | <i>LSU1</i>      | response to low sulfur 1                                                       | -2.3 | 1.9E-03 | 8.2E-03 | -1.5 | 1.0E-01 | 3.1E-01 |
| AT5G15830 | <i>bZIP3</i>     | basic leucine-zipper 3                                                         | -2.3 | 4.1E-07 | 6.5E-06 | -1.5 | 7.3E-03 | 6.0E-02 |
| AT5G22310 | <i>AT5G22310</i> | trichohyalin-like protein                                                      | -2.3 | 9.4E-07 | 1.3E-05 | -1.4 | 2.6E-02 | 1.4E-01 |
| AT3G26830 | <i>PAD3</i>      | Cytochrome P450 superfamily protein                                            | -2.3 | 6.5E-03 | 2.3E-02 | 1.1  | 7.7E-01 | 9.0E-01 |
| AT1G20620 | <i>CAT3</i>      | catalase 3                                                                     | -2.3 | 1.4E-07 | 2.6E-06 | -1.8 | 5.6E-05 | 2.2E-03 |
| AT5G15120 | <i>AT5G15120</i> | 2-aminoethanethiol dioxygenase, putative (DUF1637)                             | -2.3 | 7.3E-03 | 2.5E-02 | 1.2  | 5.6E-01 | 7.8E-01 |
| AT3G50740 | <i>UGT72E1</i>   | UDP-glucosyl transferase 72E1                                                  | -2.3 | 1.4E-09 | 4.9E-08 | -1.3 | 1.5E-02 | 9.8E-02 |
| AT4G29780 | <i>AT4G29780</i> | nuclease                                                                       | -2.3 | 1.9E-03 | 8.3E-03 | -1.1 | 6.1E-01 | 8.1E-01 |
| AT5G46050 | <i>PTR3</i>      | peptide transporter 3                                                          | -2.3 | 9.5E-05 | 6.8E-04 | 1.8  | 1.6E-03 | 2.1E-02 |
| AT5G56320 | <i>EXPA14</i>    | expansin A14                                                                   | -2.3 | 4.1E-06 | 4.7E-05 | 1.1  | 4.6E-01 | 7.0E-01 |
| AT1G22500 | <i>ATL15</i>     | RING/U-box superfamily protein                                                 | -2.3 | 1.1E-05 | 1.1E-04 | -1.0 | 7.9E-01 | 9.1E-01 |
| AT3G08030 | <i>AT3G08030</i> | DNA-directed RNA polymerase subunit beta (Protein of unknown function, DUF642) | -2.3 | 1.6E-10 | 7.4E-09 | -1.3 | 7.7E-03 | 6.2E-02 |
| AT4G37390 | <i>BRU6</i>      | Auxin-responsive GH3 family protein                                            | -2.3 | 1.1E-06 | 1.5E-05 | -1.2 | 2.9E-01 | 5.5E-01 |
| AT4G18510 | <i>CLE2</i>      | CLAVATA3/ESR-related 2                                                         | -2.3 | 1.7E-04 | 1.1E-03 | 1.1  | 5.7E-01 | 7.9E-01 |
| AT2G17060 | <i>AT2G17060</i> | Disease resistance protein (TIR-NBS-LRR class)                                 | -2.3 | 3.4E-04 | 2.0E-03 | -1.6 | 3.1E-02 | 1.5E-01 |
| AT2G05180 | <i>CYP705A6</i>  | cytochrome P450, family 705, subfamily A, polypeptide 6                        | -2.3 | 1.3E-04 | 9.0E-04 | 1.2  | 2.2E-01 | 4.8E-01 |
| AT5G06740 | <i>AT5G06740</i> | Concanavalin A-like lectin protein kinase family protein                       | -2.3 | 2.4E-05 | 2.1E-04 | -1.2 | 2.1E-01 | 4.7E-01 |
| AT5G47990 | <i>CYP705A5</i>  | cytochrome P450, family 705, subfamily A, polypeptide 5                        | -2.3 | 8.6E-05 | 6.2E-04 | 1.3  | 2.2E-01 | 4.8E-01 |
| AT3G25290 | <i>AT3G25290</i> | Auxin-responsive family protein                                                | -2.3 | 2.5E-10 | 1.1E-08 | -1.4 | 1.7E-03 | 2.3E-02 |
| AT4G13310 | <i>CYP71A20</i>  | cytochrome P450, family 71, subfamily A, polypeptide 20                        | -2.3 | 1.2E-05 | 1.2E-04 | 1.1  | 6.8E-01 | 8.5E-01 |
| AT4G21490 | <i>NDB3</i>      | NAD(P)H dehydrogenase B3                                                       | -2.3 | 5.6E-03 | 2.0E-02 | 1.1  | 6.4E-01 | 8.3E-01 |
| AT2G25410 | <i>AT2G25410</i> | RING/U-box superfamily protein                                                 | -2.3 | 1.6E-02 | 4.6E-02 | -1.7 | 1.0E-01 | 3.1E-01 |
| AT1G14960 | <i>AT1G14960</i> | Polyketide cyclase/dehydrase and lipid transport superfamily protein           | -2.3 | 1.1E-03 | 5.4E-03 | 1.4  | 1.1E-01 | 3.2E-01 |
| AT1G11735 | <i>MIR171B</i>   |                                                                                | -2.3 | 8.4E-04 | 4.2E-03 | -1.6 | 4.1E-02 | 1.8E-01 |
| AT1G78865 | <i>AT1G78865</i> |                                                                                | -2.3 | 1.6E-02 | 4.7E-02 | 1.4  | 2.3E-01 | 4.9E-01 |
| AT1G11000 | <i>MLO4</i>      | Seven transmembrane MLO family protein                                         | -2.3 | 6.9E-10 | 2.6E-08 | -1.4 | 1.6E-03 | 2.1E-02 |
| AT1G18075 | <i>MIR159B</i>   |                                                                                | -2.3 | 1.3E-02 | 4.1E-02 | 1.7  | 5.6E-02 | 2.2E-01 |
| AT1G30250 | <i>AT1G30250</i> | hypothetical protein                                                           | -2.3 | 1.3E-02 | 4.0E-02 | 2.2  | 9.2E-03 | 7.0E-02 |
| AT2G27010 | <i>CYP705A9</i>  | cytochrome P450, family 705, subfamily A, polypeptide 9                        | -2.3 | 5.3E-08 | 1.1E-06 | -1.0 | 9.4E-01 | 9.8E-01 |
| AT3G25790 | <i>AT3G25790</i> | myb-like transcription factor family protein                                   | -2.3 | 2.6E-08 | 6.0E-07 | 1.1  | 2.3E-01 | 4.9E-01 |
| AT5G44460 | <i>CML43</i>     | calmodulin like 43                                                             | -2.3 | 1.3E-05 | 1.3E-04 | 1.1  | 4.6E-01 | 7.0E-01 |
| AT1G11655 | <i>AT1G11655</i> | hypothetical protein                                                           | -2.3 | 1.5E-03 | 6.7E-03 | 1.1  | 6.8E-01 | 8.5E-01 |
| AT5G54530 | <i>AT5G54530</i> | serine protease, putative (Protein of unknown function, DUF538)                | -2.3 | 1.4E-05 | 1.3E-04 | -1.7 | 1.3E-03 | 1.9E-02 |
| AT5G44920 | <i>AT5G44920</i> | Toll-Interleukin-Resistance (TIR) domain family protein                        | -2.3 | 3.5E-07 | 5.7E-06 | -1.2 | 2.3E-01 | 4.8E-01 |
| AT3G43270 | <i>AT3G43270</i> | Plant invertase/pectin methylesterase inhibitor superfamily                    | -2.3 | 2.8E-06 | 3.4E-05 | -1.8 | 1.6E-04 | 4.4E-03 |
| AT4G37220 | <i>AT4G37220</i> | Cold acclimation protein WCOR413 family                                        | -2.3 | 8.1E-04 | 4.1E-03 | -1.2 | 4.8E-01 | 7.2E-01 |
| AT5G23830 | <i>AT5G23830</i> | MD-2-related lipid recognition domain-containing protein                       | -2.3 | 4.2E-04 | 2.4E-03 | 1.4  | 1.1E-01 | 3.2E-01 |
| AT1G79310 | <i>MC7</i>       | metacaspase 7                                                                  | -2.3 | 9.7E-07 | 1.4E-05 | -1.1 | 3.7E-01 | 6.3E-01 |
| AT1G52070 | <i>AT1G52070</i> | Mannose-binding lectin superfamily protein                                     | -2.3 | 5.8E-03 | 2.1E-02 | 1.8  | 4.1E-02 | 1.8E-01 |
| AT3G58190 | <i>LBD29</i>     | lateral organ boundaries-domain 29                                             | -2.3 | 2.3E-03 | 9.7E-03 | -1.0 | 9.9E-01 | 1.0E+00 |
| AT3G49190 | <i>AT3G49190</i> | O-acyltransferase (WSD1-like) family protein                                   | -2.3 | 6.0E-03 | 2.2E-02 | 1.0  | 9.0E-01 | 9.6E-01 |
| AT2G46150 | <i>AT2G46150</i> | Late embryogenesis abundant (LEA) hydroxyproline-rich glycoprotein family      | -2.3 | 1.1E-04 | 7.7E-04 | 1.2  | 2.3E-01 | 4.9E-01 |
| AT2G30370 | <i>CHAL</i>      | allergen-like protein                                                          | -2.3 | 7.5E-04 | 3.8E-03 | -1.4 | 8.7E-02 | 2.8E-01 |
| AT4G25750 | <i>ABCG4</i>     | ABC-2 type transporter family protein                                          | -2.3 | 3.8E-04 | 2.2E-03 | -1.2 | 4.5E-01 | 7.0E-01 |
| AT5G15130 | <i>WRKY72</i>    | WRKY DNA-binding protein 72                                                    | -2.3 | 6.8E-07 | 1.0E-05 | -1.1 | 4.3E-01 | 6.8E-01 |
| AT1G73330 | <i>DR4</i>       | drought-repressed 4                                                            | -2.2 | 4.3E-03 | 1.6E-02 | 1.1  | 7.2E-01 | 8.8E-01 |
| AT2G46660 | <i>CYP78A6</i>   | cytochrome P450, family 78, subfamily A, polypeptide 6                         | -2.2 | 9.1E-06 | 9.3E-05 | -1.7 | 8.7E-04 | 1.4E-02 |

|           |           |                                                                               |      |         |         |      |         |         |
|-----------|-----------|-------------------------------------------------------------------------------|------|---------|---------|------|---------|---------|
| AT4G30410 | AT4G30410 | sequence-specific DNA binding transcription factor                            | -2.2 | 1.4E-07 | 2.6E-06 | -1.7 | 1.1E-04 | 3.3E-03 |
| AT1G15125 | AT1G15125 | S-adenosyl-L-methionine-dependent methyltransferases superfamily protein      | -2.2 | 1.6E-04 | 1.1E-03 | 1.1  | 6.3E-01 | 8.3E-01 |
| AT2G02610 | AT2G02610 | Cysteine/Histidine-rich C1 domain family protein                              | -2.2 | 1.3E-04 | 8.6E-04 | 1.3  | 1.4E-01 | 3.8E-01 |
| AT2G38760 | ANNAT3    | annexin 3                                                                     | -2.2 | 7.6E-07 | 1.1E-05 | -1.1 | 5.9E-01 | 7.9E-01 |
| AT1G19610 | PDF1.4    | defensin-like protein                                                         | -2.2 | 1.6E-03 | 7.3E-03 | 1.9  | 4.5E-03 | 4.4E-02 |
| AT3G43960 | AT3G43960 | Cysteine proteinases superfamily protein                                      | -2.2 | 3.8E-09 | 1.2E-07 | -1.3 | 8.6E-03 | 6.7E-02 |
| AT1G01070 | UMAMIT28  | nodulin MtN21 /EamA-like transporter family                                   | -2.2 | 1.2E-04 | 8.1E-04 | 1.0  | 8.6E-01 | 9.5E-01 |
| AT5G54050 | AT5G54050 | Cysteine/Histidine-rich C1 domain family protein                              | -2.2 | 1.3E-02 | 4.1E-02 | 1.0  | 9.0E-01 | 9.6E-01 |
| AT1G60095 | AT1G60095 | Mannose-binding lectin superfamily protein                                    | -2.2 | 7.0E-05 | 5.2E-04 | -1.0 | 8.3E-01 | 9.3E-01 |
| AT5G26660 | MYB86     | myb domain protein 86                                                         | -2.2 | 1.1E-04 | 7.8E-04 | 1.1  | 6.3E-01 | 8.2E-01 |
| AT5G57480 | AT5G57480 | P-loop containing nucleoside triphosphate hydrolases superfamily protein      | -2.2 | 1.1E-10 | 5.6E-09 | -1.4 | 6.3E-04 | 1.2E-02 |
| AT1G74080 | MYB122    | myb domain protein 122                                                        | -2.2 | 7.3E-05 | 5.4E-04 | -1.3 | 1.5E-01 | 3.9E-01 |
| AT5G22460 | AT5G22460 | alpha/beta-Hydrolases superfamily protein                                     | -2.2 | 1.4E-05 | 1.3E-04 | -1.5 | 1.9E-02 | 1.1E-01 |
| AT1G77200 | AT1G77200 | Integrase-type DNA-binding superfamily protein                                | -2.2 | 8.6E-05 | 6.2E-04 | -1.6 | 1.3E-02 | 8.8E-02 |
| AT4G16670 | AT4G16670 | auxin canalization protein (DUF828)                                           | -2.2 | 6.3E-05 | 4.8E-04 | -1.9 | 7.1E-04 | 1.3E-02 |
| AT3G27510 | AT3G27510 | Cysteine/Histidine-rich C1 domain family protein                              | -2.2 | 1.7E-05 | 1.6E-04 | -1.2 | 3.1E-01 | 5.7E-01 |
| AT5G59080 | AT5G59080 | hypothetical protein                                                          | -2.2 | 2.4E-06 | 3.0E-05 | -1.0 | 9.4E-01 | 9.8E-01 |
| AT3G21680 | AT3G21680 | hypothetical protein                                                          | -2.2 | 9.6E-05 | 6.9E-04 | 1.3  | 8.1E-02 | 2.7E-01 |
| AT1G52050 | AT1G52050 | Mannose-binding lectin superfamily protein                                    | -2.2 | 1.3E-02 | 3.9E-02 | 1.3  | 3.3E-01 | 6.0E-01 |
| AT5G52220 | AT5G52220 | chromosome transmission fidelity-like protein                                 | -2.2 | 1.7E-02 | 5.0E-02 | -1.1 | 7.9E-01 | 9.1E-01 |
| AT1G79580 | SMB       | NAC (No Apical Meristem) domain transcriptional regulator superfamily protein | -2.2 | 9.0E-03 | 3.0E-02 | 1.6  | 7.7E-02 | 2.6E-01 |
| AT3G02850 | SKOR      | STELAR K outward rectifier                                                    | -2.2 | 6.2E-05 | 4.7E-04 | 1.1  | 7.0E-01 | 8.6E-01 |
| AT3G03500 | AT3G03500 | TatD related DNase                                                            | -2.2 | 2.7E-03 | 1.1E-02 | 1.2  | 5.1E-01 | 7.4E-01 |
| AT3G07600 | AT3G07600 | Heavy metal transport/detoxification superfamily protein                      | -2.2 | 7.3E-04 | 3.8E-03 | -1.0 | 8.8E-01 | 9.6E-01 |
| AT1G20160 | ATSBT5.2  | Subtilisin-like serine endopeptidase family protein                           | -2.2 | 7.8E-07 | 1.1E-05 | 1.0  | 9.2E-01 | 9.7E-01 |
| AT5G39890 | AT5G39890 | 2-aminoethanethiol dioxygenase, putative (DUF1637)                            | -2.2 | 2.0E-05 | 1.8E-04 | 1.0  | 9.0E-01 | 9.6E-01 |
| AT5G28300 | AT5G28300 | Duplicated homeodomain-like superfamily protein                               | -2.2 | 2.3E-07 | 3.9E-06 | -1.5 | 1.4E-03 | 2.0E-02 |
| AT2G29130 | LAC2      | laccase 2                                                                     | -2.2 | 1.0E-03 | 5.0E-03 | -1.6 | 2.9E-02 | 1.5E-01 |
| AT5G63540 | RM11      | recQ-mediated instability protein (DUF1767)                                   | -2.2 | 2.9E-03 | 1.2E-02 | 1.2  | 4.5E-01 | 7.0E-01 |
| AT5G47950 | AT5G47950 | HXXXD-type acyl-transferase family protein                                    | -2.2 | 1.7E-06 | 2.2E-05 | 1.0  | 9.8E-01 | 1.0E+00 |
| AT1G56630 | AT1G56630 | alpha/beta-Hydrolases superfamily protein                                     | -2.2 | 1.7E-04 | 1.1E-03 | 1.3  | 8.5E-02 | 2.8E-01 |
| AT4G30140 | CDEF1     | GDSL-like Lipase/Acylhydrolase superfamily protein                            | -2.2 | 4.2E-03 | 1.6E-02 | -1.1 | 6.0E-01 | 8.0E-01 |
| AT5G40030 | AT5G40030 | Protein kinase superfamily protein                                            | -2.2 | 3.2E-03 | 1.3E-02 | 1.4  | 1.5E-01 | 3.9E-01 |
| AT1G11740 | AT1G11740 | ankyrin repeat family protein                                                 | -2.2 | 7.1E-08 | 1.4E-06 | -1.7 | 3.6E-05 | 1.6E-03 |
| AT2G30930 | AT2G30930 | hypothetical protein                                                          | -2.2 | 8.2E-07 | 1.2E-05 | -1.5 | 2.2E-03 | 2.8E-02 |
| AT4G38340 | AT4G38340 | Plant regulator RWP-RK family protein                                         | -2.2 | 7.7E-05 | 5.6E-04 | -1.5 | 1.8E-02 | 1.1E-01 |
| AT5G47590 | AT5G47590 | Heat shock protein HSP20/alpha crystallin family                              | -2.2 | 1.9E-04 | 1.2E-03 | -1.2 | 3.2E-01 | 5.8E-01 |
| AT2G38940 | PHT1      |                                                                               | -2.2 | 4.6E-06 | 5.3E-05 | -1.0 | 8.9E-01 | 9.6E-01 |
| AT3G23800 | SBP3      | selenium-binding protein 3                                                    | -2.2 | 2.7E-05 | 2.3E-04 | 1.3  | 7.5E-02 | 2.6E-01 |
| AT5G60310 | AT5G60310 | Concanavalin A-like lectin protein kinase family protein                      | -2.2 | 6.7E-04 | 3.5E-03 | 1.1  | 7.3E-01 | 8.8E-01 |
| AT4G39675 | AT4G39675 | hypothetical protein                                                          | -2.2 | 7.2E-04 | 3.7E-03 | 1.0  | 9.3E-01 | 9.8E-01 |
| AT1G19530 | AT1G19530 | DNA polymerase epsilon catalytic subunit A                                    | -2.2 | 1.3E-02 | 4.1E-02 | -1.0 | 9.9E-01 | 1.0E+00 |
| AT5G02360 | AT5G02360 | DC1 domain-containing protein                                                 | -2.2 | 5.5E-06 | 6.1E-05 | -1.0 | 8.9E-01 | 9.6E-01 |
| AT3G45650 | NAXT1     | nitrate excretion transporter1                                                | -2.2 | 3.6E-07 | 5.8E-06 | -1.1 | 6.7E-01 | 8.5E-01 |
| AT3G03470 | CYP89A9   | cytochrome P450, family 87, subfamily A, polypeptide 9                        | -2.2 | 1.1E-07 | 2.0E-06 | -1.4 | 3.4E-03 | 3.7E-02 |
| AT1G52060 | AT1G52060 | Mannose-binding lectin superfamily protein                                    | -2.2 | 1.7E-02 | 4.9E-02 | 1.7  | 8.3E-02 | 2.8E-01 |
| AT5G14020 | AT5G14020 | Endosomal targeting BRO1-like domain-containing protein                       | -2.2 | 4.5E-03 | 1.7E-02 | 1.4  | 1.2E-01 | 3.4E-01 |
| AT5G53190 | SWEET3    | Nodulin MtN3 family protein                                                   | -2.2 | 8.5E-04 | 4.3E-03 | -1.0 | 9.7E-01 | 9.9E-01 |
| AT4G17220 | MAP70-5   | microtubule-associated proteins 70-5                                          | -2.2 | 1.3E-06 | 1.7E-05 | 1.0  | 8.4E-01 | 9.4E-01 |
| AT3G48260 | WNK3      | with no lysine (K) kinase 3                                                   | -2.2 | 7.5E-07 | 1.1E-05 | -1.9 | 1.5E-05 | 8.9E-04 |
| AT3G14260 | AT3G14260 | LURP-one-like protein (DUF567)                                                | -2.2 | 2.3E-04 | 1.4E-03 | -1.2 | 3.3E-01 | 6.0E-01 |
| AT1G26200 | AT1G26200 | TRAM, LAG1 and CLN8 (TLC) lipid-sensing domain containing protein             | -2.2 | 1.4E-02 | 4.3E-02 | -1.1 | 7.0E-01 | 8.7E-01 |
| AT5G18860 | NSH3      | inosine-uridine preferring nucleoside hydrolase family protein                | -2.2 | 1.3E-10 | 6.1E-09 | -1.0 | 6.5E-01 | 8.3E-01 |
| AT5G19040 | IPT5      | isopentenyltransferase 5                                                      | -2.2 | 1.2E-04 | 8.0E-04 | -1.3 | 1.3E-01 | 3.6E-01 |
| AT5G06940 | AT5G06940 | Leucine-rich repeat receptor-like protein kinase family protein               | -2.2 | 1.3E-02 | 4.0E-02 | 1.6  | 8.3E-02 | 2.8E-01 |
| AT2G15370 | FUT5      | fucosyltransferase 5                                                          | -2.1 | 4.7E-03 | 1.7E-02 | 1.6  | 3.7E-02 | 1.7E-01 |
| AT4G13560 | UNE15     | Late embryogenesis abundant protein (LEA) family protein                      | -2.1 | 1.1E-02 | 3.4E-02 | -2.2 | 8.3E-03 | 6.6E-02 |
| AT1G73066 | AT1G73066 | Leucine-rich repeat family protein                                            | -2.1 | 3.8E-06 | 4.4E-05 | 1.4  | 1.2E-02 | 8.2E-02 |
| AT3G07000 | AT3G07000 | Cysteine/Histidine-rich C1 domain family protein                              | -2.1 | 5.5E-06 | 6.1E-05 | -1.4 | 2.1E-02 | 1.2E-01 |
| AT2G44740 | CYCP4     | 0                                                                             | -2.1 | 7.1E-05 | 5.3E-04 | 1.2  | 2.1E-01 | 4.7E-01 |
| AT3G07990 | SCPL27    | serine carboxypeptidase-like 27                                               | -2.1 | 8.1E-12 | 5.4E-10 | -1.4 | 1.9E-05 | 1.1E-03 |
| AT4G14980 | AT4G14980 | Cysteine/Histidine-rich C1 domain family protein                              | -2.1 | 4.7E-03 | 1.7E-02 | 1.5  | 6.2E-02 | 2.3E-01 |
| AT1G66040 | VIM4      | Zinc finger (C3HC4-type RING finger) family protein                           | -2.1 | 8.8E-03 | 2.9E-02 | -2.1 | 1.1E-02 | 7.6E-02 |
| AT5G41260 | BSK8      | kinase with tetratricopeptide repeat domain-containing protein                | -2.1 | 6.1E-12 | 4.3E-10 | -1.2 | 5.3E-02 | 2.1E-01 |
| AT4G27450 | AT4G27450 | aluminum induced protein with YGL and LRDR                                    | -2.1 | 3.1E-08 | 7.1E-07 | 1.1  | 3.8E-01 | 6.4E-01 |
| AT4G13918 | AT4G13918 | Natural antisense transcript overlaps with AT4G13920                          | -2.1 | 5.7E-06 | 6.3E-05 | 1.1  | 3.3E-01 | 5.9E-01 |
| AT2G43000 | NAC042    | NAC domain containing protein 42                                              | -2.1 | 1.5E-02 | 4.6E-02 | -1.0 | 8.5E-01 | 9.5E-01 |
| AT3G25780 | AOC3      | allene oxide cyclase 3                                                        | -2.1 | 4.5E-06 | 5.1E-05 | 1.2  | 1.6E-01 | 4.0E-01 |
| AT3G14210 | ESM1      | GDSL-like lipase/acylhydrolase superfamily protein                            | -2.1 | 1.7E-03 | 7.5E-03 | -1.4 | 1.0E-01 | 3.1E-01 |

|           |                  |                                                                         |      |         |         |      |         |         |
|-----------|------------------|-------------------------------------------------------------------------|------|---------|---------|------|---------|---------|
| AT1G07090 | <i>LSH6</i>      | LIGHT-DEPENDENT SHORT HYPOCOTYLS-like protein (DUF640)                  | -2.1 | 7.8E-05 | 5.7E-04 | -1.8 | 1.5E-03 | 2.1E-02 |
| AT1G17250 | <i>RLP3</i>      | receptor like protein 3                                                 | -2.1 | 8.3E-03 | 2.8E-02 | 1.1  | 6.8E-01 | 8.5E-01 |
| AT2G13910 | <i>AT2G13910</i> | pseudogene of Cysteine/Histidine-rich C1 domain family protein          | -2.1 | 2.6E-04 | 1.6E-03 | 1.2  | 2.2E-01 | 4.8E-01 |
| AT4G22235 | <i>AT4G22235</i> | defensin-like protein                                                   | -2.1 | 3.7E-03 | 1.5E-02 | 1.3  | 2.9E-01 | 5.5E-01 |
| AT5G40730 | <i>AGP24</i>     | arabinogalactan protein 24                                              | -2.1 | 2.2E-05 | 1.9E-04 | -1.3 | 8.6E-02 | 2.8E-01 |
| AT3G17580 | <i>AT3G17580</i> | SsrA-binding protein                                                    | -2.1 | 4.0E-05 | 3.3E-04 | -1.5 | 1.8E-02 | 1.1E-01 |
| AT4G14270 | <i>AT4G14270</i> | polyadenylate-binding protein interacting protein                       | -2.1 | 2.3E-09 | 7.5E-08 | -1.0 | 6.2E-01 | 8.2E-01 |
| AT4G25220 | <i>G3Pp2</i>     | root hair specific 15                                                   | -2.1 | 1.5E-04 | 9.9E-04 | -1.0 | 9.7E-01 | 9.9E-01 |
| AT5G60100 | <i>PRR3</i>      | pseudo-response regulator 3                                             | -2.1 | 3.7E-08 | 8.2E-07 | 1.1  | 4.1E-01 | 6.7E-01 |
| AT5G58660 | <i>AT5G58660</i> | 2-oxoglutarate (2OG) and Fe(II)-dependent oxygenase superfamily protein | -2.1 | 5.8E-05 | 4.5E-04 | -1.0 | 7.6E-01 | 8.9E-01 |
| AT3G20935 | <i>CYP705A28</i> | cytochrome P450, family 705, subfamily A, polypeptide 28                | -2.1 | 1.5E-04 | 1.0E-03 | 1.2  | 2.9E-01 | 5.5E-01 |
| AT2G26360 | <i>AT2G26360</i> | Mitochondrial substrate carrier family protein                          | -2.1 | 3.0E-06 | 3.6E-05 | -1.0 | 8.4E-01 | 9.4E-01 |
| AT2G39855 | <i>AT2G39855</i> | plant/protein                                                           | -2.1 | 1.1E-02 | 3.5E-02 | -1.7 | 6.3E-02 | 2.3E-01 |
| AT3G09940 | <i>MDHAR</i>     | monodehydroascorbate reductase                                          | -2.1 | 6.0E-04 | 3.2E-03 | 1.3  | 1.7E-01 | 4.1E-01 |
| AT5G43180 | <i>AT5G43180</i> | transmembrane protein, putative (Protein of unknown function, DUF599)   | -2.1 | 1.7E-04 | 1.1E-03 | -1.1 | 7.7E-01 | 9.0E-01 |
| AT1G50560 | <i>CYP705A25</i> | cytochrome P450, family 705, subfamily A, polypeptide 25                | -2.1 | 1.9E-06 | 2.5E-05 | 1.0  | 7.3E-01 | 8.8E-01 |
| AT5G42280 | <i>AT5G42280</i> | Cysteine/Histidine-rich C1 domain family protein                        | -2.1 | 8.2E-07 | 1.2E-05 | -1.2 | 1.6E-01 | 4.0E-01 |
| AT3G51570 | <i>AT3G51570</i> | Disease resistance protein (TIR-NBS-LRR class)                          | -2.1 | 8.4E-03 | 2.8E-02 | -1.5 | 1.1E-01 | 3.3E-01 |
| AT3G01760 | <i>AT3G01760</i> | Transmembrane amino acid transporter family protein                     | -2.1 | 9.6E-04 | 4.7E-03 | 1.1  | 7.5E-01 | 8.9E-01 |
| AT1G72060 | <i>AT1G72060</i> | serine-type endopeptidase inhibitor                                     | -2.1 | 6.8E-03 | 2.4E-02 | 1.2  | 3.9E-01 | 6.5E-01 |
| AT4G15330 | <i>CYP705A1</i>  | cytochrome P450, family 705, subfamily A, polypeptide 1                 | -2.1 | 4.4E-05 | 3.5E-04 | -1.1 | 7.4E-01 | 8.8E-01 |
| AT1G63300 | <i>AT1G63300</i> | Myosin heavy chain-related protein                                      | -2.1 | 3.9E-10 | 1.6E-08 | -1.5 | 2.7E-05 | 1.3E-03 |
| AT1G10070 | <i>BCAT-2</i>    | branched-chain amino acid transaminase 2                                | -2.1 | 1.8E-03 | 7.8E-03 | -1.3 | 2.6E-01 | 5.3E-01 |
| AT3G48550 | <i>AT3G48550</i> | SHOOT GRAVITROPISM-like protein                                         | -2.1 | 1.9E-05 | 1.7E-04 | -1.5 | 9.7E-03 | 7.2E-02 |
| AT1G80130 | <i>AT1G80130</i> | Tetratricopeptide repeat (TPR)-like superfamily protein                 | -2.1 | 9.2E-03 | 3.0E-02 | -2.0 | 1.1E-02 | 7.8E-02 |
| AT4G06701 | <i>AT4G06701</i> |                                                                         | -2.1 | 3.5E-05 | 2.9E-04 | -1.1 | 7.1E-01 | 8.7E-01 |
| AT2G21820 | <i>AT2G21820</i> | seed maturation protein                                                 | -2.1 | 2.3E-03 | 9.6E-03 | 1.0  | 9.5E-01 | 9.9E-01 |
| AT2G29750 | <i>UGT71C1</i>   | UDP-glucosyl transferase 71C1                                           | -2.1 | 9.8E-07 | 1.4E-05 | 1.2  | 2.1E-01 | 4.6E-01 |
| AT5G42630 | <i>ATS</i>       | Homeodomain-like superfamily protein                                    | -2.1 | 3.4E-03 | 1.3E-02 | 1.7  | 1.7E-02 | 1.0E-01 |
| AT3G46330 | <i>MEE39</i>     | Leucine-rich repeat protein kinase family protein                       | -2.1 | 4.0E-03 | 1.5E-02 | -1.5 | 8.6E-02 | 2.8E-01 |
| AT3G53210 | <i>UMAMIT6</i>   | nodulin MtN21 /EamA-like transporter family                             | -2.1 | 3.7E-05 | 3.1E-04 | 1.3  | 7.2E-02 | 2.5E-01 |
| AT4G30120 | <i>HMA3</i>      | heavy metal atpase 3                                                    | -2.1 | 2.5E-03 | 1.0E-02 | -1.3 | 2.2E-01 | 4.8E-01 |
| AT5G18910 | <i>AT5G18910</i> | Protein kinase superfamily protein                                      | -2.1 | 1.7E-02 | 4.9E-02 | 1.4  | 1.8E-01 | 4.3E-01 |
| AT1G66280 | <i>BGLU22</i>    | Glycosyl hydrolase superfamily protein                                  | -2.1 | 6.0E-06 | 6.6E-05 | 1.5  | 5.3E-03 | 4.8E-02 |
| AT5G48090 | <i>ELP1</i>      | EDM2-like protein1                                                      | -2.1 | 2.2E-03 | 9.4E-03 | -1.3 | 2.0E-01 | 4.5E-01 |
| AT4G29190 | <i>OZF2</i>      | Zinc finger C-x8-C-x5-C-x3-H type family protein                        | -2.1 | 1.9E-04 | 1.2E-03 | -1.3 | 1.9E-01 | 4.4E-01 |
| AT1G04490 | <i>AT1G04490</i> | hypothetical protein (DUF3527)                                          | -2.1 | 7.1E-03 | 2.5E-02 | -1.1 | 7.0E-01 | 8.7E-01 |
| AT3G13640 | <i>ABCE1</i>     | RNase I inhibitor protein 1                                             | -2.1 | 3.3E-03 | 1.3E-02 | -1.4 | 1.1E-01 | 3.2E-01 |
| AT1G07880 | <i>ATMPK13</i>   | Protein kinase superfamily protein                                      | -2.1 | 9.5E-05 | 6.8E-04 | -1.5 | 2.3E-02 | 1.3E-01 |
| AT1G10550 | <i>XTH33</i>     | xyloglucan:xyloglucosyl transferase 33                                  | -2.1 | 6.7E-04 | 3.5E-03 | -1.3 | 2.2E-01 | 4.8E-01 |
| AT5G12930 | <i>AT5G12930</i> | inactive rhomboid protein                                               | -2.1 | 2.1E-05 | 1.8E-04 | -1.5 | 5.7E-03 | 5.1E-02 |
| AT1G70990 | <i>AT1G70990</i> | proline-rich family protein                                             | -2.1 | 6.2E-05 | 4.7E-04 | -1.5 | 8.7E-03 | 6.7E-02 |
| AT2G23330 | <i>AT2G23330</i> | transposable_element_gene                                               | -2.1 | 1.9E-08 | 4.6E-07 | 1.3  | 1.1E-02 | 7.9E-02 |
| AT3G62780 | <i>AT3G62780</i> | Calcium-dependent lipid-binding (CaLB domain) family protein            | -2.1 | 2.2E-03 | 9.5E-03 | -1.3 | 2.0E-01 | 4.6E-01 |
| AT1G08650 | <i>PPCK1</i>     | phosphoenolpyruvate carboxylase kinase 1                                | -2.1 | 4.1E-09 | 1.3E-07 | -1.1 | 3.1E-01 | 5.7E-01 |
| AT5G20420 | <i>CHR42</i>     | chromatin remodeling 42                                                 | -2.1 | 5.5E-04 | 3.0E-03 | 1.2  | 2.9E-01 | 5.5E-01 |
| AT5G08185 | <i>MIR162A</i>   | microRNA162A                                                            | -2.1 | 1.1E-06 | 1.6E-05 | 1.0  | 8.5E-01 | 9.4E-01 |
| AT5G40780 | <i>LHT1</i>      | lysine histidine transporter 1                                          | -2.1 | 7.7E-06 | 8.1E-05 | -1.1 | 3.5E-01 | 6.2E-01 |
| AT1G78130 | <i>UNE2</i>      | Major facilitator superfamily protein                                   | -2.1 | 1.9E-07 | 3.4E-06 | -1.1 | 2.5E-01 | 5.1E-01 |
| AT5G22355 | <i>AT5G22355</i> | Cysteine/Histidine-rich C1 domain family protein                        | -2.1 | 5.2E-07 | 8.0E-06 | -1.1 | 2.4E-01 | 5.0E-01 |
| AT3G61680 | <i>AT3G61680</i> | alpha/beta-Hydrolases superfamily protein                               | -2.1 | 8.6E-05 | 6.2E-04 | -1.7 | 1.3E-03 | 1.9E-02 |
| AT1G26960 | <i>AtHB23</i>    | homeobox protein 23                                                     | -2.0 | 2.2E-08 | 5.2E-07 | -1.1 | 1.7E-01 | 4.1E-01 |
| AT1G61950 | <i>CPK19</i>     | calcium-dependent protein kinase 19                                     | -2.0 | 2.0E-03 | 8.6E-03 | 1.0  | 9.5E-01 | 9.8E-01 |
| AT1G34540 | <i>CYP94D1</i>   | cytochrome P450, family 94, subfamily D, polypeptide 1                  | -2.0 | 3.7E-03 | 1.4E-02 | 1.0  | 8.6E-01 | 9.5E-01 |
| AT2G16060 | <i>HB1</i>       | hemoglobin 1                                                            | -2.0 | 6.3E-03 | 2.2E-02 | 1.1  | 7.2E-01 | 8.7E-01 |
| AT1G22065 | <i>AT1G22065</i> | hypothetical protein                                                    | -2.0 | 2.0E-03 | 8.7E-03 | -1.0 | 8.4E-01 | 9.4E-01 |
| AT5G01700 | <i>AT5G01700</i> | Protein phosphatase 2C family protein                                   | -2.0 | 5.2E-10 | 2.1E-08 | -1.1 | 5.1E-01 | 7.4E-01 |
| AT1G35330 | <i>AT1G35330</i> | RING/U-box superfamily protein                                          | -2.0 | 8.1E-05 | 5.9E-04 | 1.1  | 6.1E-01 | 8.1E-01 |
| AT2G31860 | <i>AT2G31860</i> | pseudogene of poly(ADP-ribose) glycohydrolase 2                         | -2.0 | 8.2E-03 | 2.8E-02 | -1.1 | 7.6E-01 | 9.0E-01 |
| AT1G33440 | <i>AT1G33440</i> | Major facilitator superfamily protein                                   | -2.0 | 1.6E-04 | 1.0E-03 | -1.3 | 1.3E-01 | 3.6E-01 |
| AT1G54120 | <i>AT1G54120</i> | hypothetical protein                                                    | -2.0 | 4.9E-05 | 3.9E-04 | 1.4  | 3.3E-02 | 1.6E-01 |
| AT5G55250 | <i>IAMT1</i>     | IAA carboxylmethyltransferase 1                                         | -2.0 | 1.5E-04 | 9.9E-04 | 1.2  | 2.6E-01 | 5.3E-01 |
| AT5G46260 | <i>AT5G46260</i> | disease resistance protein (TIR-NBS-LRR class)                          | -2.0 | 7.2E-03 | 2.5E-02 | -1.0 | 9.7E-01 | 9.9E-01 |
| AT1G60110 | <i>AT1G60110</i> | Mannose-binding lectin superfamily protein                              | -2.0 | 8.7E-03 | 2.9E-02 | -1.7 | 4.0E-02 | 1.8E-01 |
| AT5G63350 | <i>AT5G63350</i> | von willebrand factor A domain protein                                  | -2.0 | 6.9E-03 | 2.4E-02 | 1.0  | 9.3E-01 | 9.8E-01 |
| AT4G12270 | <i>AT4G12270</i> | Copper amine oxidase family protein                                     | -2.0 | 3.0E-03 | 1.2E-02 | 1.2  | 3.5E-01 | 6.2E-01 |
| AT2G03590 | <i>UPS1</i>      | ureide permease 1                                                       | -2.0 | 6.7E-08 | 1.4E-06 | -1.2 | 6.0E-02 | 2.3E-01 |
| AT5G03570 | <i>IREG2</i>     | iron regulated 2                                                        | -2.0 | 3.3E-05 | 2.8E-04 | -1.1 | 3.6E-01 | 6.2E-01 |
| AT2G22970 | <i>SCPL11</i>    | serine carboxypeptidase-like 11                                         | -2.0 | 4.9E-08 | 1.0E-06 | -1.8 | 1.6E-06 | 2.0E-04 |
| AT2G02630 | <i>AT2G02630</i> | Cysteine/Histidine-rich C1 domain family protein                        | -2.0 | 1.3E-03 | 6.3E-03 | 1.1  | 5.4E-01 | 7.6E-01 |
| AT1G19540 | <i>AT1G19540</i> | NmrA-like negative transcriptional regulator family protein             | -2.0 | 9.8E-05 | 6.9E-04 | -1.1 | 7.0E-01 | 8.6E-01 |

|           |                  |                                                                        |      |         |         |      |         |         |
|-----------|------------------|------------------------------------------------------------------------|------|---------|---------|------|---------|---------|
| AT1G60130 | <i>AT1G60130</i> | Mannose-binding lectin superfamily protein                             | -2.0 | 5.0E-03 | 1.9E-02 | -1.6 | 5.3E-02 | 2.1E-01 |
| AT1G09570 | <i>PHYA</i>      | phytochrome A                                                          | -2.0 | 6.2E-10 | 2.4E-08 | -1.4 | 1.7E-04 | 4.6E-03 |
| AT1G18990 | <i>AT1G18990</i> | myosin-binding protein, putative (Protein of unknown function, DUF593) | -2.0 | 3.0E-03 | 1.2E-02 | -1.5 | 4.8E-02 | 2.0E-01 |
| AT5G19170 | <i>AT5G19170</i> | NEP-interacting protein, putative (DUF239)                             | -2.0 | 1.4E-04 | 9.5E-04 | -1.2 | 2.1E-01 | 4.7E-01 |
| AT3G61028 | <i>AT3G61028</i> | Putative endonuclease or glycosyl hydrolase                            | -2.0 | 1.1E-02 | 3.5E-02 | -1.2 | 4.0E-01 | 6.5E-01 |
| AT2G15400 | <i>NRPE3B</i>    | DNA-directed RNA polymerase family protein                             | -2.0 | 7.4E-03 | 2.6E-02 | 1.0  | 9.9E-01 | 1.0E+00 |
| AT5G08000 | <i>E13L3</i>     | glucan endo-1,3-beta-glucosidase-like protein 3                        | -2.0 | 2.1E-05 | 1.9E-04 | 1.3  | 5.7E-02 | 2.2E-01 |
| AT3G26220 | <i>CYP71B3</i>   | cytochrome P450, family 71, subfamily B, polypeptide 3                 | -2.0 | 3.7E-05 | 3.0E-04 | -1.3 | 4.6E-02 | 1.9E-01 |
| AT1G67910 | <i>AT1G67910</i> | hypothetical protein                                                   | -2.0 | 3.5E-06 | 4.1E-05 | -1.6 | 3.1E-04 | 7.1E-03 |
| AT3G06450 | <i>AT3G06450</i> | HCO3- transporter family                                               | -2.0 | 4.0E-10 | 1.7E-08 | 1.1  | 2.7E-01 | 5.4E-01 |
