# Supplementary material for: Degradation of the transcription factors PIF4 and PIF5 under UV‐B promotes UVR8‐mediated inhibition of hypocotyl growth in Arabidopsis
Source: PubMed Central journal article supplement — Plant J. 2019 Nov 7;101(3):507–17. doi: 10.1111/tpj.14556 (PMC7027837; doi:10.1111/tpj.14556), 2019-11-07
Supplement: TPJ-101-507-s004.pdf [file TPJ-101-507-s004.pdf]

**Table S3. UV-B-induced genes in Col wild type and/or genes misexpressed in *pif4-101 pif5-3* in white light grown plants (lists corresponding to Figure 2F).**

**Description**

[Col UV/WL Up and \*pif45\* /Col WL Up: 24 genes](#)

[Col UV/WL Up and \*pif45\* /Col WL Down: 14 genes](#)

[Col UV/WL Up: 1032 genes](#)

[pif45 /Col WL Up: 96 genes](#)

[pif45 /Col WL Down: 377 genes](#)

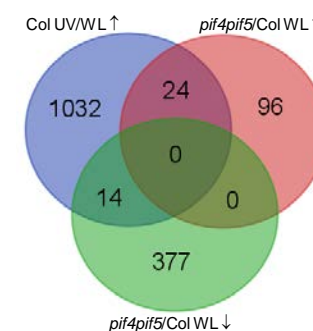

| Col UV/WL Up and <i>pif45</i> /Col WL Up |                  |                                                                     | Col UV/WL    |         |                 | <i>pif45</i> /Col WL    |         |                 |
|------------------------------------------|------------------|---------------------------------------------------------------------|--------------|---------|-----------------|-------------------------|---------|-----------------|
| AGI                                      | gene             | description                                                         | Col_UV/WL_FC | pvalue  | pvalue_with_FDR | <i>pif45</i> /Col_WL_FC | pvalue  | pvalue_with_FDR |
| AT5G10760                                | <i>AT5G10760</i> | Eukaryotic aspartyl protease family protein                         | 33.9         | 5.2E-03 | 1.9E-02         | 51.2                    | 8.9E-04 | 1.5E-02         |
| AT3G44450                                | <i>AT3G44450</i> | hypothetical protein                                                | 30.7         | 2.7E-21 | 2.6E-18         | 2.2                     | 3.4E-04 | 7.6E-03         |
| AT3G21080                                | <i>AT3G21080</i> | ABC transporter-like protein                                        | 11.0         | 8.1E-04 | 4.1E-03         | 11.5                    | 5.6E-04 | 1.1E-02         |
| AT1G13610                                | <i>AT1G13610</i> | alpha/beta-Hydrolases superfamily protein                           | 10.7         | 3.4E-11 | 1.9E-09         | 2.4                     | 2.7E-03 | 3.1E-02         |
| AT5G20230                                | <i>BCB</i>       | blue-copper-binding protein                                         | 6.4          | 4.8E-10 | 1.9E-08         | 3.7                     | 4.4E-07 | 7.6E-05         |
| AT1G26790                                | <i>AT1G26790</i> | Dof-type zinc finger DNA-binding family protein                     | 6.4          | 2.2E-11 | 1.3E-09         | 2.0                     | 1.4E-03 | 2.0E-02         |
| AT5G24420                                | <i>PGL5</i>      | 6-phosphogluconolactonase 5                                         | 5.9          | 1.7E-10 | 8.1E-09         | 2.1                     | 9.9E-04 | 1.6E-02         |
| AT3G28220                                | <i>AT3G28220</i> | TRAF-like family protein                                            | 5.8          | 1.9E-09 | 6.5E-08         | 2.7                     | 4.9E-05 | 2.0E-03         |
| AT2G40200                                | <i>AT2G40200</i> | basic helix-loop-helix (bHLH) DNA-binding superfamily protein       | 3.9          | 1.7E-06 | 2.2E-05         | 2.1                     | 4.5E-03 | 4.4E-02         |
| AT4G15680                                | <i>AT4G15680</i> | Thioredoxin superfamily protein                                     | 3.9          | 4.0E-04 | 2.3E-03         | 3.6                     | 6.5E-04 | 1.2E-02         |
| AT4G26150                                | <i>CGA1</i>      | cytokinin-responsive gata factor 1                                  | 3.4          | 1.3E-10 | 6.1E-09         | 2.3                     | 3.4E-07 | 6.2E-05         |
| AT4G15660                                | <i>AT4G15660</i> | Thioredoxin superfamily protein                                     | 3.3          | 7.1E-03 | 2.5E-02         | 6.2                     | 4.9E-05 | 2.0E-03         |
| AT5G11410                                | <i>AT5G11410</i> | Protein kinase superfamily protein                                  | 3.3          | 2.0E-04 | 1.3E-03         | 2.7                     | 1.6E-03 | 2.1E-02         |
| AT3G18217                                | <i>MIR157C</i>   |                                                                     | 3.2          | 6.0E-04 | 3.2E-03         | 2.6                     | 4.3E-03 | 4.2E-02         |
| AT3G15850                                | <i>FAD5</i>      | fatty acid desaturase 5                                             | 2.8          | 6.7E-09 | 1.9E-07         | 2.1                     | 3.8E-06 | 3.5E-04         |
| AT4G15670                                | <i>AT4G15670</i> | Thioredoxin superfamily protein                                     | 2.7          | 3.8E-03 | 1.5E-02         | 2.8                     | 2.5E-03 | 3.0E-02         |
| AT4G15700                                | <i>AT4G15700</i> | Thioredoxin superfamily protein                                     | 2.6          | 4.2E-03 | 1.6E-02         | 4.5                     | 2.1E-05 | 1.1E-03         |
| AT3G20440                                | <i>EMB2729</i>   | Alpha amylase family protein                                        | 2.6          | 1.9E-05 | 1.7E-04         | 2.0                     | 9.1E-04 | 1.5E-02         |
| AT4G29030                                | <i>AT4G29030</i> | Putative membrane lipoprotein                                       | 2.5          | 1.5E-05 | 1.4E-04         | 2.6                     | 8.0E-06 | 6.0E-04         |
| AT1G22400                                | <i>UGT85A1</i>   | UDP-Glycosyltransferase superfamily protein                         | 2.5          | 6.1E-08 | 1.3E-06         | 2.1                     | 1.5E-06 | 1.9E-04         |
| AT2G29670                                | <i>AT2G29670</i> | Tetratricopeptide repeat (TPR)-like superfamily protein             | 2.4          | 1.6E-05 | 1.5E-04         | 2.1                     | 2.3E-04 | 5.8E-03         |
| AT5G33370                                | <i>AT5G33370</i> | GDSSL-like Lipase/Acylhydrolase superfamily protein                 | 2.3          | 1.5E-02 | 4.6E-02         | 3.0                     | 1.5E-03 | 2.1E-02         |
| AT5G62360                                | <i>AT5G62360</i> | Plant invertase/pectin methylesterase inhibitor superfamily protein | 2.3          | 7.1E-04 | 3.7E-03         | 2.3                     | 9.4E-04 | 1.5E-02         |
| AT2G33850                                | <i>AT2G33850</i> | E6-like protein                                                     | 2.0          | 5.2E-04 | 2.8E-03         | 2.0                     | 3.9E-04 | 8.4E-03         |

| Col UV/WL Up and <i>pif45</i> /Col WL Down |                   |                                                  | Col UV/WL    |         |                 | <i>pif45</i> /Col WL    |         |                 |
|--------------------------------------------|-------------------|--------------------------------------------------|--------------|---------|-----------------|-------------------------|---------|-----------------|
| AGI                                        | gene              | description                                      | Col_UV/WL_FC | pvalue  | pvalue_with_FDR | <i>pif45</i> /Col_WL_FC | pvalue  | pvalue_with_FDR |
| AT5G17780                                  | <i>AT5G17780</i>  | alpha/beta-Hydrolases superfamily protein        | 6.4          | 2.4E-14 | 3.3E-12         | -3.3                    | 1.5E-07 | 3.5E-05         |
| AT4G13810                                  | <i>RLP47</i>      | receptor like protein 47                         | 4.8          | 1.2E-06 | 1.7E-05         | -3.1                    | 3.2E-03 | 3.5E-02         |
| AT5G44568                                  | <i>AT5G44568</i>  | transmembrane protein                            | 4.4          | 2.1E-06 | 2.6E-05         | -5.5                    | 1.1E-04 | 3.3E-03         |
| AT1G66100                                  | <i>AT1G66100</i>  | Plant thionin                                    | 4.4          | 2.5E-04 | 1.5E-03         | -6.7                    | 4.7E-05 | 1.9E-03         |
| AT5G05390                                  | <i>LAC12</i>      | laccase 12                                       | 4.2          | 4.4E-05 | 3.5E-04         | -4.0                    | 1.7E-03 | 2.3E-02         |
| AT1G19510                                  | <i>RL5</i>        | RAD-like 5                                       | 3.8          | 9.3E-05 | 6.7E-04         | -7.2                    | 1.5E-04 | 4.3E-03         |
| AT2G36590                                  | <i>ProT3</i>      | proline transporter 3                            | 3.4          | 9.9E-10 | 3.6E-08         | -2.4                    | 5.8E-06 | 4.8E-04         |
| AT3G22235                                  | <i>AT3G22235</i>  | cysteine-rich TM module stress tolerance protein | 3.2          | 2.6E-03 | 1.1E-02         | -5.7                    | 3.7E-03 | 3.8E-02         |
| AT5G17700                                  | <i>AT5G17700</i>  | MATE efflux family protein                       | 2.7          | 5.6E-06 | 6.2E-05         | -2.2                    | 1.8E-04 | 4.8E-03         |
| AT1G78440                                  | <i>ATGA2OX1</i>   | gibberellin 2-beta-dioxygenase                   | 2.5          | 1.4E-03 | 6.6E-03         | -4.7                    | 2.0E-04 | 5.2E-03         |
| AT4G29110                                  | <i>AT4G29110</i>  | cotton fiber protein                             | 2.4          | 2.7E-05 | 2.4E-04         | -2.1                    | 6.3E-04 | 1.2E-02         |
| AT2G29370                                  | <i>AT2G29370</i>  | NAD(P)-binding Rossmann-fold superfamily protein | 2.3          | 4.2E-04 | 2.4E-03         | -2.8                    | 7.8E-04 | 1.3E-02         |
| AT1G62560                                  | <i>FMO GS-OX3</i> | flavin-monooxygenase glucosinolate S-oxygenase 3 | 2.3          | 6.3E-04 | 3.3E-03         | -2.3                    | 2.9E-03 | 3.2E-02         |
| AT1G18710                                  | <i>MYB47</i>      | myb domain protein 47                            | 2.0          | 1.3E-03 | 6.2E-03         | -3.7                    | 2.2E-05 | 1.2E-03         |

| Col UV/WL Up |                  |                                                         | Col UV/WL    |         |                 | <i>pif45</i> /Col WL    |         |                 |
|--------------|------------------|---------------------------------------------------------|--------------|---------|-----------------|-------------------------|---------|-----------------|
| AGI          | gene             | description                                             | Col_UV/WL_FC | pvalue  | pvalue_with_FDR | <i>pif45</i> /Col_WL_FC | pvalue  | pvalue_with_FDR |
| AT2G22590    | <i>AT2G22590</i> | UDP-Glycosyltransferase superfamily protein             | 1047.8       | 2.4E-24 | 1.3E-20         | -1.1                    | 9.0E-01 | 9.6E-01         |
| AT3G22840    | <i>ELIP1</i>     | Chlorophyll A-B binding family protein                  | 470.0        | 3.6E-16 | 9.4E-14         | 1.5                     | 5.7E-01 | 7.8E-01         |
| AT4G34550    | <i>AT4G34550</i> | F-box protein                                           | 340.6        | 1.2E-16 | 3.5E-14         | -1.1                    | 9.3E-01 | 9.8E-01         |
| AT4G31870    | <i>GPX7</i>      | glutathione peroxidase 7                                | 221.3        | 1.6E-21 | 1.9E-18         | 1.4                     | 5.2E-01 | 7.4E-01         |
| AT4G15480    | <i>UGT84A1</i>   | UDP-Glycosyltransferase superfamily protein             | 164.6        | 2.1E-21 | 2.2E-18         | -1.3                    | 5.0E-01 | 7.4E-01         |
| AT5G17030    | <i>UGT78D3</i>   | UDP-glucosyl transferase 78D3                           | 155.4        | 3.1E-06 | 3.7E-05         | 1.0                     | 1.0E+00 | 1.0E+00         |
| AT5G62210    | <i>AT5G62210</i> | Embryo-specific protein 3, (ATS3)                       | 148.9        | 2.2E-22 | 3.4E-19         | -1.3                    | 5.4E-01 | 7.6E-01         |
| AT1G64340    | <i>AT1G64340</i> | Serine/Threonine-kinase                                 | 130.0        | 7.0E-06 | 7.4E-05         | 6.0                     | 1.8E-01 | 4.3E-01         |
| AT5G13930    | <i>TT4</i>       | Chalcone and stilbene synthase family protein           | 102.0        | 2.2E-13 | 2.4E-11         | -1.2                    | 6.3E-01 | 8.3E-01         |
| AT5G08640    | <i>FLS1</i>      | flavonol synthase 1                                     | 92.8         | 7.6E-15 | 1.2E-12         | -1.0                    | 9.9E-01 | 1.0E+00         |
| AT1G75040    | <i>PR5</i>       | pathogenesis-related protein 5                          | 69.3         | 2.8E-10 | 1.2E-08         | 4.3                     | 5.6E-02 | 2.2E-01         |
| AT1G76290    | <i>AT1G76290</i> | AMP-dependent synthetase and ligase family              | 63.9         | 2.8E-04 | 1.7E-03         | 1.0                     | 1.0E+00 | 1.0E+00         |
| AT5G17040    | <i>AT5G17040</i> | UDP-Glycosyltransferase superfamily protein             | 61.6         | 9.6E-17 | 2.9E-14         | -1.4                    | 4.7E-01 | 7.1E-01         |
| AT2G42540    | <i>COR15A</i>    | cold-regulated 15a                                      | 61.4         | 6.6E-06 | 7.1E-05         | -18.1                   | 2.5E-01 | 5.1E-01         |
| AT1G69560    | <i>MYB105</i>    | myb domain protein 105                                  | 55.4         | 1.0E-04 | 7.2E-04         | 3.5                     | 3.2E-01 | 5.8E-01         |
| AT3G62610    | <i>MYB11</i>     | myb domain protein 11                                   | 53.3         | 4.8E-10 | 2.0E-08         | -1.1                    | 9.2E-01 | 9.7E-01         |
| AT1G80340    | <i>GA3OX2</i>    | gibberellin 3-oxidase 2                                 | 50.4         | 2.7E-12 | 2.1E-10         | 2.9                     | 5.8E-02 | 2.2E-01         |
| AT1G66540    | <i>AT1G66540</i> | Cytochrome P450 superfamily protein                     | 41.8         | 5.5E-16 | 1.3E-13         | 2.0                     | 4.3E-02 | 1.9E-01         |
| AT3G10185    | <i>AT3G10185</i> | Gibberellin-regulated family protein                    | 41.8         | 8.7E-03 | 2.9E-02         | 1.0                     | 1.0E+00 | 1.0E+00         |
| AT2G16367    | <i>AT2G16367</i> |                                                         | 41.7         | 3.3E-05 | 2.8E-04         | -1.1                    | 9.6E-01 | 9.9E-01         |
| AT4G12320    | <i>CYP706A6</i>  | cytochrome P450, family 706, subfamily A, polypeptide 6 | 37.5         | 7.1E-13 | 6.6E-11         | 1.2                     | 7.7E-01 | 9.0E-01         |
| AT5G55570    | <i>AT5G55570</i> | transmembrane protein                                   | 36.3         | 1.5E-10 | 7.0E-09         | 1.1                     | 9.3E-01 | 9.8E-01         |

|           |           |                                                                      |      |         |         |      |         |         |
|-----------|-----------|----------------------------------------------------------------------|------|---------|---------|------|---------|---------|
| AT3G07620 | AT3G07620 | glycosyltransferase                                                  | 34.4 | 1.6E-08 | 4.0E-07 | -1.1 | 9.1E-01 | 9.7E-01 |
| AT4G23496 | SP1L5     | SPIRAL1-like5                                                        | 33.0 | 9.3E-11 | 4.7E-09 | 1.3  | 7.0E-01 | 8.7E-01 |
| AT5G48880 | KAT5      | peroxisomal 3-keto-acyl-CoA thiolase 2                               | 31.4 | 4.4E-20 | 3.0E-17 | 1.2  | 2.3E-01 | 4.9E-01 |
| AT4G22090 | AT4G22090 | Pectin lyase-like superfamily protein                                | 31.1 | 4.4E-05 | 3.5E-04 | 1.6  | 7.2E-01 | 8.7E-01 |
| AT1G52770 | AT1G52770 | Phototropic-responsive NPH3 family protein                           | 29.7 | 1.3E-05 | 1.2E-04 | 3.6  | 2.0E-01 | 4.5E-01 |
| AT3G30460 | AT3G30460 | RING/U-box superfamily protein                                       | 29.6 | 3.4E-09 | 1.1E-07 | 1.2  | 8.3E-01 | 9.3E-01 |
| AT2G36750 | UGT73C1   | UDP-glucosyl transferase 73C1                                        | 27.7 | 2.7E-11 | 1.6E-09 | 2.7  | 4.8E-02 | 2.0E-01 |
| AT5G07990 | TT7       | Cytochrome P450 superfamily protein                                  | 26.6 | 5.4E-23 | 1.2E-19 | -1.0 | 9.9E-01 | 1.0E+00 |
| AT5G09930 | ABCF2     | ABC transporter family protein                                       | 25.9 | 1.5E-14 | 2.2E-12 | 1.1  | 8.1E-01 | 9.2E-01 |
| AT2G24000 | scpl22    | serine carboxypeptidase-like 22                                      | 25.6 | 4.5E-03 | 1.7E-02 | 1.0  | 1.0E+00 | 1.0E+00 |
| AT1G10370 | ERD9      | Glutathione S-transferase family protein                             | 24.9 | 8.7E-25 | 6.3E-21 | -1.4 | 1.6E-02 | 9.9E-02 |
| AT4G18422 | AT4G18422 | transmembrane protein                                                | 23.1 | 2.9E-05 | 2.5E-04 | -1.1 | 9.4E-01 | 9.8E-01 |
| AT3G63320 | AT3G63320 | Protein phosphatase 2C family protein                                | 23.0 | 7.0E-03 | 2.4E-02 | 11.0 | 5.4E-02 | 2.1E-01 |
| AT2G15020 | AT2G15020 | hypothetical protein                                                 | 22.4 | 9.7E-12 | 6.3E-10 | 1.8  | 6.7E-02 | 2.4E-01 |
| AT5G17220 | GSTF12    | glutathione S-transferase phi 12                                     | 21.7 | 1.2E-10 | 5.7E-09 | -1.2 | 6.3E-01 | 8.2E-01 |
| AT1G27940 | ABC13     | P-glycoprotein 13                                                    | 21.4 | 3.1E-10 | 1.3E-08 | -2.7 | 1.4E-01 | 3.7E-01 |
| AT2G27420 | AT2G27420 | Cysteine proteinases superfamily protein                             | 21.3 | 2.4E-15 | 4.6E-13 | 1.0  | 9.7E-01 | 9.9E-01 |
| AT1G12570 | AT1G12570 | Glucose-methanol-choline (GMC) oxidoreductase family protein         | 21.2 | 1.7E-09 | 5.8E-08 | 1.1  | 8.8E-01 | 9.6E-01 |
| AT5G05270 | CHIL      | Chalcone-flavanone isomerase family protein                          | 20.9 | 1.2E-21 | 1.5E-18 | -1.5 | 8.5E-03 | 6.7E-02 |
| AT5G66740 | AT5G66740 | spindle assembly abnormal protein (DUF620)                           | 20.2 | 5.1E-09 | 1.5E-07 | 2.3  | 1.3E-01 | 3.6E-01 |
| AT2G47460 | MYB12     | myb domain protein 12                                                | 19.7 | 4.9E-22 | 6.6E-19 | 1.4  | 1.3E-02 | 8.7E-02 |
| AT1G07330 | AT1G07330 | dentin sialophosphoprotein                                           | 19.7 | 2.8E-08 | 6.5E-07 | 1.7  | 3.8E-01 | 6.4E-01 |
| AT1G65060 | 4CL3      | 4-coumarate:CoA ligase 3                                             | 19.6 | 1.8E-14 | 2.5E-12 | 1.1  | 7.0E-01 | 8.7E-01 |
| AT4G10250 | ATHSP22.0 | HSP20-like chaperones superfamily protein                            | 16.7 | 4.5E-05 | 3.6E-04 | 3.5  | 1.2E-01 | 3.4E-01 |
| AT3G55120 | TT5       | Chalcone-flavanone isomerase family protein                          | 15.2 | 7.2E-25 | 6.3E-21 | -1.6 | 1.3E-05 | 8.4E-04 |
| AT5G15960 | KIN1      | stress-responsive protein (KIN1) / stress-induced protein (KIN1)     | 14.8 | 5.6E-09 | 1.6E-07 | 1.0  | 9.5E-01 | 9.9E-01 |
| AT4G04840 | MSRB6     | methionine sulfoxide reductase B6                                    | 14.3 | 2.0E-14 | 2.9E-12 | 1.5  | 3.0E-02 | 1.5E-01 |
| AT5G62240 | AT5G62240 | Cell cycle regulated microtubule associated protein                  | 14.2 | 1.8E-11 | 1.1E-09 | 1.3  | 4.7E-01 | 7.1E-01 |
| AT5G51030 | AT5G51030 | NAD(P)-binding Rossmann-fold superfamily protein                     | 14.0 | 1.4E-10 | 6.7E-09 | 2.4  | 1.6E-02 | 1.0E-01 |
| AT2G03520 | UPS4      | ureide permease 4                                                    | 13.3 | 2.5E-10 | 1.1E-08 | -1.6 | 3.1E-01 | 5.7E-01 |
| AT3G52740 | AT3G52740 | hypothetical protein                                                 | 13.2 | 1.3E-20 | 9.9E-18 | 1.6  | 2.4E-03 | 2.9E-02 |
| AT2G20825 | ULT2      | Developmental regulator, ULTRAPETALA                                 | 12.7 | 2.8E-06 | 3.4E-05 | 2.7  | 9.5E-02 | 3.0E-01 |
| AT3G21560 | UGT84A2   | UDP-Glycosyltransferase superfamily protein                          | 12.7 | 1.3E-23 | 3.6E-20 | 1.0  | 7.2E-01 | 8.8E-01 |
| AT1G65490 | AT1G65490 | transmembrane protein                                                | 12.6 | 1.4E-14 | 2.1E-12 | 1.6  | 3.0E-02 | 1.5E-01 |
| AT5G36910 | THI2.2    | thionin 2.2                                                          | 12.1 | 9.4E-14 | 1.1E-11 | -1.4 | 9.0E-02 | 2.9E-01 |
| AT1G06000 | AT1G06000 | UDP-Glycosyltransferase superfamily protein                          | 11.3 | 8.3E-20 | 5.4E-17 | 1.0  | 9.5E-01 | 9.9E-01 |
| AT3G21150 | BBX32     | B-box 32                                                             | 11.0 | 4.0E-12 | 3.0E-10 | 1.6  | 6.7E-02 | 2.4E-01 |
| AT5G50800 | SWEET13   | Nodulin MtN3 family protein                                          | 10.8 | 8.9E-06 | 9.1E-05 | 3.0  | 6.0E-02 | 2.3E-01 |
| AT4G27560 | AT4G27560 | UDP-Glycosyltransferase superfamily protein                          | 10.6 | 4.5E-17 | 1.5E-14 | -1.1 | 4.4E-01 | 6.9E-01 |
| AT1G06180 | MYB13     | myb domain protein 13                                                | 10.5 | 1.5E-14 | 2.2E-12 | 1.5  | 6.0E-02 | 2.3E-01 |
| AT1G65870 | AT1G65870 | Disease resistance-responsive (dirigent-like protein) family protein | 10.4 | 4.4E-13 | 4.4E-11 | 1.5  | 1.0E-01 | 3.1E-01 |
| AT3G62960 | AT3G62960 | Thioredoxin superfamily protein                                      | 10.2 | 1.3E-05 | 1.3E-04 | -1.2 | 7.7E-01 | 9.0E-01 |
| AT5G24150 | SQP1      | FAD/NAD(P)-binding oxidoreductase family protein                     | 10.2 | 8.6E-13 | 7.9E-11 | -1.1 | 7.7E-01 | 9.0E-01 |
| AT1G09500 | AT1G09500 | NAD(P)-binding Rossmann-fold superfamily protein                     | 10.1 | 4.9E-05 | 3.8E-04 | 1.7  | 4.3E-01 | 6.8E-01 |
| AT4G05110 | ENT6      | equilibrative nucleoside transporter 6                               | 10.0 | 1.7E-11 | 1.1E-09 | -1.2 | 4.9E-01 | 7.2E-01 |
| AT2G29170 | AT2G29170 | NAD(P)-binding Rossmann-fold superfamily protein                     | 9.9  | 3.4E-07 | 5.5E-06 | -1.7 | 3.2E-01 | 5.8E-01 |
| AT1G23010 | LPR1      | Cupredoxin superfamily protein                                       | 9.8  | 2.7E-14 | 3.7E-12 | -1.3 | 1.6E-01 | 4.0E-01 |
| AT1G52990 | AT1G52990 | thioredoxin family protein                                           | 9.8  | 1.1E-06 | 1.5E-05 | 1.8  | 1.9E-01 | 4.5E-01 |
| AT1G01520 | ASG4      | Homeodomain-like superfamily protein                                 | 9.5  | 6.8E-15 | 1.1E-12 | 1.4  | 7.9E-02 | 2.7E-01 |
| AT1G76530 | AT1G76530 | Auxin efflux carrier family protein                                  | 9.4  | 5.4E-05 | 4.2E-04 | 1.3  | 7.2E-01 | 8.7E-01 |
| AT5G04000 | AT5G04000 | hypothetical protein                                                 | 9.4  | 1.2E-14 | 1.8E-12 | 1.4  | 8.3E-02 | 2.8E-01 |
| AT2G25530 | AT2G25530 | AFG1-like ATPase family protein                                      | 9.4  | 1.4E-21 | 1.7E-18 | 1.1  | 5.0E-01 | 7.3E-01 |
| AT3G23810 | SAHH2     | S-adenosyl-l-homocysteine (SAH) hydrolase 2                          | 9.4  | 4.5E-15 | 7.7E-13 | -1.8 | 8.7E-04 | 1.4E-02 |
| AT5G16530 | PIN5      | Auxin efflux carrier family protein                                  | 9.2  | 3.8E-06 | 4.4E-05 | 3.2  | 1.6E-02 | 1.0E-01 |
| AT3G10150 | PAP16     | purple acid phosphatase 16                                           | 9.1  | 2.7E-06 | 3.3E-05 | 1.4  | 4.9E-01 | 7.2E-01 |
| AT3G57020 | AT3G57020 | Calcium-dependent phosphotriesterase superfamily protein             | 9.1  | 2.0E-16 | 5.7E-14 | 1.0  | 8.4E-01 | 9.4E-01 |
| AT5G23730 | RUP2      | Transducin/WD40 repeat-like superfamily protein                      | 9.0  | 1.3E-19 | 8.1E-17 | 1.2  | 1.2E-01 | 3.4E-01 |
| AT5G09990 | PROPEP5   | elicitor peptide 5 precursor                                         | 9.0  | 5.3E-09 | 1.5E-07 | 1.1  | 7.0E-01 | 8.7E-01 |
| AT1G06540 | AT1G06540 | hypothetical protein                                                 | 9.0  | 1.8E-09 | 6.2E-08 | -1.9 | 1.2E-01 | 3.4E-01 |
| AT4G00970 | CRK41     | cysteine-rich RLK (RECEPTOR-like protein kinase) 41                  | 8.9  | 8.2E-09 | 2.2E-07 | 1.3  | 4.2E-01 | 6.7E-01 |
| AT1G02820 | LEA3      | Late embryogenesis abundant 3 (LEA3) family protein                  | 8.7  | 3.5E-12 | 2.6E-10 | 1.2  | 4.5E-01 | 7.0E-01 |
| AT3G01550 | PPT2      | phosphoenolpyruvate (pep)/phosphate translocator 2                   | 8.6  | 5.3E-12 | 3.8E-10 | 1.1  | 5.7E-01 | 7.9E-01 |
| AT4G18650 | AT4G18650 | transcription factor-like protein                                    | 8.6  | 2.8E-10 | 1.2E-08 | -1.5 | 2.2E-01 | 4.8E-01 |
| AT1G57770 | AT1G57770 | FAD/NAD(P)-binding oxidoreductase family protein                     | 8.5  | 1.3E-18 | 6.1E-16 | 1.1  | 2.8E-01 | 5.5E-01 |
| AT5G49330 | MYB111    | myb domain protein 111                                               | 8.4  | 5.3E-08 | 1.1E-06 | 1.4  | 3.7E-01 | 6.3E-01 |
| AT4G26530 | FBA5      | Aldolase superfamily protein                                         | 8.4  | 3.1E-06 | 3.7E-05 | -2.7 | 1.3E-02 | 8.8E-02 |
| AT4G37760 | SQE3      | squalene epoxidase 3                                                 | 7.8  | 3.5E-17 | 1.2E-14 | -1.1 | 5.5E-01 | 7.7E-01 |
| AT5G60900 | RLK1      | receptor-like protein kinase 1                                       | 7.6  | 6.0E-05 | 4.6E-04 | -1.1 | 8.7E-01 | 9.5E-01 |
| AT1G66725 | MIR163    |                                                                      | 7.6  | 2.0E-15 | 3.8E-13 | -1.1 | 4.8E-01 | 7.2E-01 |
| AT1G56650 | PAP1      | production of anthocyanin pigment 1                                  | 7.4  | 5.5E-03 | 2.0E-02 | 1.6  | 6.0E-01 | 8.0E-01 |
| AT5G17050 | UGT78D2   | UDP-glucosyl transferase 78D2                                        | 7.3  | 5.1E-23 | 1.2E-19 | 1.1  | 4.6E-01 | 7.1E-01 |
| AT1G55960 | AT1G55960 | Polyketide cyclase/dehydrase and lipid transport superfamily protein | 7.3  | 6.1E-15 | 1.0E-12 | 1.5  | 1.2E-02 | 8.1E-02 |
| AT2G18490 | AT2G18490 | C2H2-like zinc finger protein                                        | 7.2  | 9.6E-04 | 4.7E-03 | 2.9  | 9.5E-02 | 3.0E-01 |
| AT1G55320 | AAE18     | acyl-activating enzyme 18                                            | 7.2  | 2.6E-17 | 8.9E-15 | 1.2  | 1.8E-01 | 4.2E-01 |
| AT2G36295 | AT2G36295 | hypothetical protein                                                 | 7.1  | 1.9E-05 | 1.7E-04 | 1.5  | 4.0E-01 | 6.6E-01 |

|           |                 |                                                                                                    |     |         |         |      |         |         |
|-----------|-----------------|----------------------------------------------------------------------------------------------------|-----|---------|---------|------|---------|---------|
| AT3G51238 | AT3G51238       | Natural antisense transcript overlaps with AT3G51240                                               | 7.1 | 1.8E-06 | 2.3E-05 | -7.4 | 6.5E-03 | 5.6E-02 |
| AT1G28610 | AT1G28610       | GDSL-like Lipase/Acylhydrolase superfamily protein                                                 | 7.1 | 3.5E-13 | 3.6E-11 | -1.1 | 6.8E-01 | 8.5E-01 |
| AT1G65560 | AT1G65560       | Zinc-binding dehydrogenase family protein                                                          | 7.0 | 1.7E-18 | 7.3E-16 | 1.1  | 3.6E-01 | 6.2E-01 |
| AT3G56290 | AT3G56290       | potassium transporter                                                                              | 6.8 | 1.0E-18 | 5.0E-16 | 1.4  | 5.7E-03 | 5.1E-02 |
| AT4G13900 | <i>RLP49</i>    | pseudogene of receptor like protein 47                                                             | 6.8 | 6.4E-09 | 1.8E-07 | -1.7 | 1.0E-01 | 3.1E-01 |
| AT3G46260 | AT3G46260       | kinase-like protein                                                                                | 6.7 | 2.0E-03 | 8.6E-03 | 2.5  | 1.8E-01 | 4.3E-01 |
| AT1G14250 | AT1G14250       | GDA1/CD39 nucleoside phosphatase family protein                                                    | 6.6 | 1.1E-03 | 5.1E-03 | 2.1  | 2.4E-01 | 5.1E-01 |
| AT1G03940 | AT1G03940       | HXXXD-type acyl-transferase family protein                                                         | 6.6 | 1.1E-03 | 5.3E-03 | -1.6 | 5.6E-01 | 7.7E-01 |
| AT2G36145 | AT2G36145       | hypothetical protein                                                                               | 6.6 | 2.6E-16 | 7.0E-14 | 1.4  | 2.3E-02 | 1.3E-01 |
| AT1G78570 | <i>RHM1</i>     | rhamnose biosynthesis 1                                                                            | 6.5 | 1.4E-22 | 2.4E-19 | -1.2 | 6.5E-02 | 2.4E-01 |
| AT1G09240 | <i>NAS3</i>     | nicotianamine synthase 3                                                                           | 6.4 | 2.8E-05 | 2.4E-04 | 1.7  | 2.8E-01 | 5.4E-01 |
| AT5G22020 | AT5G22020       | Calcium-dependent phosphotriesterase superfamily protein                                           | 6.3 | 4.6E-22 | 6.6E-19 | -1.2 | 6.0E-02 | 2.3E-01 |
| AT1G04880 | AT1G04880       | HMG (high mobility group) box protein with ARID/BRIGHT DNA-binding domain-containing protein       | 6.3 | 5.6E-10 | 2.2E-08 | 1.4  | 2.0E-01 | 4.5E-01 |
| AT3G61400 | AT3G61400       | 2-oxoglutarate (2OG) and Fe(II)-dependent oxygenase superfamily protein                            | 6.3 | 5.3E-03 | 1.9E-02 | -1.1 | 9.2E-01 | 9.7E-01 |
| AT1G47370 | AT1G47370       | Toll-Interleukin-Resistance (TIR) domain family protein                                            | 6.3 | 4.7E-03 | 1.8E-02 | 3.2  | 1.0E-01 | 3.1E-01 |
| AT4G13410 | <i>ATCSLA15</i> | Nucleotide-diphospho-sugar transferases superfamily protein                                        | 6.3 | 1.5E-09 | 5.2E-08 | 1.4  | 2.1E-01 | 4.7E-01 |
| AT1G64940 | <i>CYP89A6</i>  | cytochrome P450, family 87, subfamily A, polypeptide 6                                             | 6.3 | 6.8E-12 | 4.6E-10 | 1.1  | 5.9E-01 | 8.0E-01 |
| AT2G40460 | AT2G40460       | Major facilitator superfamily protein                                                              | 6.3 | 1.3E-14 | 1.9E-12 | -1.4 | 3.5E-02 | 1.6E-01 |
| AT2G47370 | AT2G47370       | Calcium-dependent phosphotriesterase superfamily protein                                           | 6.2 | 2.7E-15 | 5.0E-13 | 1.1  | 6.2E-01 | 8.2E-01 |
| AT5G37550 | AT5G37550       | hypothetical protein                                                                               | 6.1 | 2.9E-14 | 3.9E-12 | -1.3 | 1.1E-01 | 3.2E-01 |
| AT2G36790 | <i>UGT73C6</i>  | UDP-glucosyl transferase 73C6                                                                      | 6.1 | 2.9E-10 | 1.3E-08 | -1.5 | 1.3E-01 | 3.6E-01 |
| AT5G56090 | <i>COX15</i>    | cytochrome c oxidase 15                                                                            | 6.1 | 3.1E-21 | 2.8E-18 | -1.0 | 6.6E-01 | 8.4E-01 |
| AT3G51750 | AT3G51750       | hypothetical protein                                                                               | 6.1 | 6.2E-12 | 4.3E-10 | 1.3  | 2.2E-01 | 4.7E-01 |
| AT5G02270 | <i>ABC120</i>   | non-intrinsic ABC protein 9                                                                        | 6.1 | 7.5E-21 | 6.3E-18 | 1.0  | 6.6E-01 | 8.4E-01 |
| AT1G54570 | <i>PES1</i>     | Esterase/lipase/thioesterase family protein                                                        | 6.0 | 6.8E-19 | 3.7E-16 | 1.1  | 4.3E-01 | 6.8E-01 |
| AT1G03495 | AT1G03495       | HXXXD-type acyl-transferase family protein                                                         | 6.0 | 1.3E-02 | 4.0E-02 | -1.4 | 6.9E-01 | 8.6E-01 |
| AT1G06690 | AT1G06690       | NAD(P)-linked oxidoreductase superfamily protein                                                   | 6.0 | 3.5E-21 | 3.0E-18 | -1.1 | 4.3E-01 | 6.8E-01 |
| AT4G32770 | <i>VTE1</i>     | tocopherol cyclase, chloroplast / vitamin E deficient 1 (VTE1) / sucrose export defective 1 (SXD1) | 5.9 | 9.4E-18 | 3.6E-15 | 1.1  | 3.6E-01 | 6.2E-01 |
| AT2G39240 | AT2G39240       | RNA polymerase I specific transcription initiation factor RRN3 protein                             | 5.9 | 5.2E-04 | 2.9E-03 | 2.7  | 6.2E-02 | 2.3E-01 |
| AT5G49730 | <i>FRO6</i>     | ferric reduction oxidase 6                                                                         | 5.9 | 3.1E-06 | 3.7E-05 | -2.4 | 2.4E-02 | 1.3E-01 |
| AT1G32780 | AT1G32780       | GroES-like zinc-binding dehydrogenase family                                                       | 5.9 | 5.3E-16 | 1.3E-13 | 1.1  | 3.7E-01 | 6.3E-01 |
| AT5G24155 | AT5G24155       | FAD/NAD(P)-binding oxidoreductase family protein                                                   | 5.8 | 3.5E-13 | 3.6E-11 | -1.0 | 9.9E-01 | 1.0E+00 |
| AT1G73650 | AT1G73650       | 3-oxo-5-alpha-steroid 4-dehydrogenase (DUF1295)                                                    | 5.8 | 1.2E-19 | 7.4E-17 | 1.2  | 4.9E-02 | 2.0E-01 |
| AT5G24120 | <i>SIGE</i>     | sigma factor E                                                                                     | 5.8 | 6.7E-17 | 2.1E-14 | 1.4  | 7.3E-03 | 6.0E-02 |
| AT1G23550 | <i>SRO2</i>     | similar to RCD one 2                                                                               | 5.7 | 3.8E-15 | 6.8E-13 | -1.2 | 1.4E-01 | 3.7E-01 |
| AT3G25260 | AT3G25260       | Major facilitator superfamily protein                                                              | 5.7 | 3.9E-03 | 1.5E-02 | 2.3  | 2.1E-01 | 4.6E-01 |
| AT4G27030 | <i>FADA</i>     | fatty acid desaturase A                                                                            | 5.7 | 2.5E-13 | 2.7E-11 | 1.4  | 3.2E-02 | 1.5E-01 |
| AT1G30530 | <i>UGT78D1</i>  | UDP-glucosyl transferase 78D1                                                                      | 5.7 | 2.5E-13 | 2.7E-11 | -1.0 | 9.1E-01 | 9.7E-01 |
| AT5G17165 | AT5G17165       | hypothetical protein                                                                               | 5.6 | 1.6E-16 | 4.6E-14 | 1.2  | 1.6E-01 | 4.0E-01 |
| AT5G10230 | <i>ANNAT7</i>   | annexin 7                                                                                          | 5.6 | 1.6E-08 | 3.9E-07 | -1.3 | 3.1E-01 | 5.7E-01 |
| AT2G29090 | <i>CYP707A2</i> | cytochrome P450, family 707, subfamily A, polypeptide 2                                            | 5.6 | 3.4E-09 | 1.1E-07 | 1.3  | 2.5E-01 | 5.2E-01 |
| AT2G23000 | <i>scpl10</i>   | serine carboxypeptidase-like 10                                                                    | 5.5 | 3.0E-10 | 1.3E-08 | -1.1 | 7.4E-01 | 8.8E-01 |
| AT3G44970 | AT3G44970       | Cytochrome P450 superfamily protein                                                                | 5.5 | 4.7E-06 | 5.3E-05 | 1.8  | 5.9E-02 | 2.2E-01 |
| AT2G32530 | <i>CSLB03</i>   | cellulose synthase-like B3                                                                         | 5.5 | 2.2E-12 | 1.7E-10 | 1.6  | 8.6E-03 | 6.7E-02 |
| AT2G36970 | AT2G36970       | UDP-Glycosyltransferase superfamily protein                                                        | 5.5 | 2.5E-09 | 8.2E-08 | -1.3 | 2.5E-01 | 5.2E-01 |
| AT5G44590 | AT5G44590       | S-adenosyl-L-methionine-dependent methyltransferases superfamily protein                           | 5.4 | 1.0E-03 | 5.0E-03 | -2.0 | 3.3E-01 | 5.9E-01 |
| AT4G09750 | AT4G09750       | NAD(P)-binding Rossmann-fold superfamily protein                                                   | 5.4 | 6.5E-24 | 2.3E-20 | 1.1  | 5.6E-02 | 2.2E-01 |
| AT2G36885 | AT2G36885       | translation initiation factor                                                                      | 5.3 | 2.1E-11 | 1.3E-09 | -1.0 | 9.7E-01 | 9.9E-01 |
| AT5G36790 | AT5G36790       | Haloacid dehalogenase-like hydrolase (HAD) superfamily protein                                     | 5.3 | 6.3E-08 | 1.3E-06 | 1.6  | 1.0E-01 | 3.1E-01 |
| AT1G24580 | AT1G24580       | RING/U-box superfamily protein                                                                     | 5.3 | 2.3E-08 | 5.5E-07 | 1.6  | 5.4E-02 | 2.1E-01 |
| AT5G44110 | <i>ABC121</i>   | P-loop containing nucleoside triphosphate hydrolases superfamily protein                           | 5.3 | 5.3E-13 | 5.2E-11 | 1.1  | 3.5E-01 | 6.2E-01 |
| AT5G51720 | <i>NEET</i>     | 2 iron, 2 sulfur cluster binding protein                                                           | 5.3 | 1.5E-09 | 5.4E-08 | -1.5 | 6.6E-02 | 2.4E-01 |
| AT2G16890 | AT2G16890       | UDP-Glycosyltransferase superfamily protein                                                        | 5.2 | 1.5E-15 | 3.1E-13 | -1.7 | 3.0E-04 | 6.9E-03 |
| AT1G16730 | <i>UP6</i>      | hypothetical protein                                                                               | 5.2 | 7.2E-11 | 3.7E-09 | -1.0 | 9.0E-01 | 9.7E-01 |
| AT5G58120 | AT5G58120       | Disease resistance protein (TIR-NBS-LRR class)                                                     | 5.2 | 9.8E-11 | 4.9E-09 | 1.0  | 8.4E-01 | 9.4E-01 |
| AT3G62410 | <i>CP12-2</i>   | CP12 domain-containing protein 2                                                                   | 5.1 | 1.2E-13 | 1.4E-11 | 1.1  | 6.1E-01 | 8.1E-01 |
| AT2G21970 | <i>SEP2</i>     | stress enhanced protein 2                                                                          | 5.1 | 2.0E-22 | 3.4E-19 | -1.1 | 2.0E-01 | 4.5E-01 |
| AT5G24210 | AT5G24210       | alpha/beta-Hydrolases superfamily protein                                                          | 5.1 | 4.2E-09 | 1.3E-07 | 1.7  | 2.5E-02 | 1.3E-01 |
| AT5G07190 | <i>ATS3</i>     | embryo-specific protein 3                                                                          | 5.0 | 7.8E-04 | 4.0E-03 | -3.8 | 6.6E-02 | 2.4E-01 |
| AT2G13680 | <i>CALS5</i>    | callose synthase 5                                                                                 | 5.0 | 3.3E-05 | 2.8E-04 | -1.1 | 8.2E-01 | 9.3E-01 |
| AT1G13650 | AT1G13650       | hypothetical protein                                                                               | 5.0 | 6.6E-08 | 1.3E-06 | 1.5  | 1.2E-01 | 3.3E-01 |
| AT3G62990 | AT3G62990       | myelin transcription factor-like protein                                                           | 4.9 | 1.1E-06 | 1.6E-05 | -1.5 | 2.3E-01 | 4.9E-01 |
| AT1G78720 | AT1G78720       | SecY protein transport family protein                                                              | 4.9 | 9.3E-07 | 1.3E-05 | -2.0 | 4.5E-02 | 1.9E-01 |
| AT3G12955 | AT3G12955       | SAUR-like auxin-responsive protein family                                                          | 4.9 | 5.2E-08 | 1.1E-06 | 1.2  | 4.9E-01 | 7.3E-01 |
| AT5G05410 | <i>DREB2A</i>   | DRE-binding protein 2A                                                                             | 4.9 | 8.0E-15 | 1.3E-12 | -1.2 | 2.2E-01 | 4.7E-01 |
| AT5G22300 | <i>NIT4</i>     | nitrilase 4                                                                                        | 4.8 | 2.7E-08 | 6.2E-07 | -1.2 | 3.7E-01 | 6.3E-01 |
| AT4G27360 | AT4G27360       | Dynein light chain type 1 family protein                                                           | 4.8 | 2.3E-06 | 2.9E-05 | 1.5  | 2.0E-01 | 4.6E-01 |
| AT4G25640 | <i>DTX35</i>    | detoxifying efflux carrier 35                                                                      | 4.8 | 2.6E-20 | 1.9E-17 | -1.3 | 3.2E-03 | 3.5E-02 |

|           |                  |                                                                                                                                       |     |         |         |      |         |         |
|-----------|------------------|---------------------------------------------------------------------------------------------------------------------------------------|-----|---------|---------|------|---------|---------|
| AT1G02813 | <i>AT1G02813</i> | pectinesterase (Protein of unknown function, DUF538)                                                                                  | 4.8 | 1.4E-02 | 4.2E-02 | -1.1 | 8.9E-01 | 9.6E-01 |
| AT1G76570 | <i>AT1G76570</i> | Chlorophyll A-B binding family protein                                                                                                | 4.8 | 1.2E-14 | 1.8E-12 | 1.0  | 7.0E-01 | 8.6E-01 |
| AT2G37040 | <i>PAL1</i>      | PHE ammonia lyase 1                                                                                                                   | 4.8 | 1.7E-18 | 7.3E-16 | -1.1 | 4.0E-01 | 6.6E-01 |
| AT3G48350 | <i>CEP3</i>      | Cysteine proteinases superfamily protein                                                                                              | 4.8 | 2.7E-10 | 1.2E-08 | -1.4 | 7.1E-02 | 2.5E-01 |
| AT5G49740 | <i>FRO7</i>      | ferric reduction oxidase 7                                                                                                            | 4.7 | 6.7E-08 | 1.4E-06 | -1.4 | 2.2E-01 | 4.8E-01 |
| AT2G41040 | <i>AT2G41040</i> | S-adenosyl-L-methionine-dependent methyltransferases superfamily protein                                                              | 4.7 | 2.3E-17 | 8.3E-15 | 1.1  | 6.0E-01 | 8.1E-01 |
| AT3G46090 | <i>ZAT7</i>      | C2H2 and C2HC zinc fingers superfamily protein                                                                                        | 4.7 | 1.1E-02 | 3.5E-02 | 3.4  | 5.0E-02 | 2.0E-01 |
| AT5G43570 | <i>AT5G43570</i> | Serine protease inhibitor, potato inhibitor I-type family protein                                                                     | 4.7 | 4.5E-06 | 5.1E-05 | 1.1  | 8.6E-01 | 9.5E-01 |
| AT4G21200 | <i>GA2OX8</i>    | gibberellin 2-oxidase 8                                                                                                               | 4.7 | 4.9E-06 | 5.5E-05 | -1.5 | 2.3E-01 | 5.0E-01 |
| AT5G51950 | <i>AT5G51950</i> | Glucose-methanol-choline (GMC) oxidoreductase family protein                                                                          | 4.7 | 3.4E-06 | 4.0E-05 | 1.3  | 4.4E-01 | 6.9E-01 |
| AT3G47830 | <i>AT3G47830</i> | DNA glycosylase superfamily protein                                                                                                   | 4.7 | 1.1E-05 | 1.1E-04 | 2.0  | 4.7E-02 | 2.0E-01 |
| AT5G24850 | <i>CRY3</i>      | cryptochrome 3                                                                                                                        | 4.6 | 1.8E-14 | 2.5E-12 | 1.0  | 9.4E-01 | 9.8E-01 |
| AT1G12100 | <i>AT1G12100</i> | Bifunctional inhibitor/lipid-transfer protein/seed storage 2S albumin superfamily protein                                             | 4.6 | 2.8E-04 | 1.7E-03 | 2.6  | 2.9E-02 | 1.4E-01 |
| AT2G21650 | <i>MEE3</i>      | Homeodomain-like superfamily protein                                                                                                  | 4.6 | 1.5E-02 | 4.6E-02 | 2.4  | 2.0E-01 | 4.5E-01 |
| AT5G54060 | <i>UF3GT</i>     | UDP-glucose:flavonoid 3-o-glucosyltransferase                                                                                         | 4.6 | 6.3E-03 | 2.2E-02 | -1.4 | 6.0E-01 | 8.0E-01 |
| AT4G10120 | <i>AT5SPS4F</i>  | Sucrose-phosphate synthase family protein                                                                                             | 4.6 | 9.7E-11 | 4.9E-09 | -1.4 | 3.9E-02 | 1.7E-01 |
| AT3G11110 | <i>AT3G11110</i> | RING/U-box superfamily protein                                                                                                        | 4.5 | 3.0E-06 | 3.7E-05 | 1.0  | 9.9E-01 | 1.0E+00 |
| AT5G50100 | <i>AT5G50100</i> | Putative thiol-disulfide oxidoreductase DCC                                                                                           | 4.5 | 8.2E-16 | 1.9E-13 | 1.2  | 1.2E-01 | 3.5E-01 |
| AT1G19550 | <i>AT1G19550</i> | Glutathione S-transferase family protein                                                                                              | 4.5 | 1.9E-04 | 1.2E-03 | 1.2  | 7.2E-01 | 8.7E-01 |
| AT1G12370 | <i>PHR1</i>      | photolyase 1                                                                                                                          | 4.5 | 6.8E-14 | 8.4E-12 | 1.2  | 2.8E-01 | 5.4E-01 |
| AT3G56260 | <i>AT3G56260</i> | hypothetical protein                                                                                                                  | 4.5 | 5.2E-08 | 1.1E-06 | -2.3 | 6.0E-03 | 5.2E-02 |
| AT5G13170 | <i>SAG29</i>     | senescence-associated gene 29                                                                                                         | 4.5 | 4.4E-04 | 2.5E-03 | 1.3  | 5.3E-01 | 7.6E-01 |
| AT1G20470 | <i>AT1G20470</i> | SAUR-like auxin-responsive protein family                                                                                             | 4.5 | 1.7E-10 | 7.9E-09 | 1.3  | 2.0E-01 | 4.5E-01 |
| AT4G33010 | <i>GLDP1</i>     | glycine decarboxylase P-protein 1                                                                                                     | 4.5 | 2.5E-11 | 1.5E-09 | -1.4 | 2.6E-02 | 1.4E-01 |
| AT3G11050 | <i>FER2</i>      | ferritin 2                                                                                                                            | 4.5 | 3.5E-10 | 1.5E-08 | 1.2  | 2.9E-01 | 5.5E-01 |
| AT2G38210 | <i>PDX1L4</i>    | putative PDX1-like protein 4                                                                                                          | 4.5 | 1.7E-11 | 1.0E-09 | 1.1  | 5.6E-01 | 7.7E-01 |
| AT5G15970 | <i>KIN2</i>      | stress-responsive protein (KIN2) / stress-induced protein (KIN2) / cold-responsive protein (COR6.6) / cold-regulated protein (COR6.6) | 4.4 | 9.2E-07 | 1.3E-05 | -1.1 | 7.3E-01 | 8.8E-01 |
| AT5G23000 | <i>MYB37</i>     | myb domain protein 37                                                                                                                 | 4.4 | 1.2E-05 | 1.2E-04 | -1.0 | 9.3E-01 | 9.8E-01 |
| AT5G05580 | <i>FAD8</i>      | fatty acid desaturase 8                                                                                                               | 4.4 | 5.9E-10 | 2.3E-08 | 1.5  | 1.6E-02 | 1.0E-01 |
| AT3G06490 | <i>MYB108</i>    | myb domain protein 108                                                                                                                | 4.4 | 6.4E-04 | 3.4E-03 | 2.4  | 5.2E-02 | 2.1E-01 |
| AT2G36870 | <i>XTH32</i>     | xyloglucan endotransglucosylase/hydrolase 32                                                                                          | 4.4 | 3.0E-13 | 3.1E-11 | 1.1  | 5.8E-01 | 7.9E-01 |
| AT5G40210 | <i>UMAMIT42</i>  | nodulin MtN21 /EamA-like transporter family                                                                                           | 4.3 | 4.7E-07 | 7.4E-06 | 1.2  | 4.5E-01 | 7.0E-01 |
| AT3G19170 | <i>PREP1</i>     | presequence protease 1                                                                                                                | 4.3 | 1.3E-16 | 3.7E-14 | 1.3  | 1.5E-02 | 9.4E-02 |
| AT1G42560 | <i>MLO9</i>      | Seven transmembrane MLO family protein                                                                                                | 4.3 | 6.8E-06 | 7.3E-05 | -1.6 | 1.9E-01 | 4.4E-01 |
| AT4G01660 | <i>ABC1</i>      | ABC transporter 1                                                                                                                     | 4.3 | 1.1E-23 | 3.5E-20 | 1.1  | 1.8E-01 | 4.2E-01 |
| AT3G07700 | <i>AT3G07700</i> | Protein kinase superfamily protein                                                                                                    | 4.3 | 1.2E-18 | 5.6E-16 | 1.0  | 8.1E-01 | 9.2E-01 |
| AT4G04850 | <i>KEA3</i>      | K efflux antiporter 3                                                                                                                 | 4.3 | 5.0E-14 | 6.4E-12 | 1.4  | 6.3E-03 | 5.4E-02 |
| AT1G35140 | <i>PHI-1</i>     | Phosphate-responsive 1 family protein                                                                                                 | 4.2 | 4.2E-10 | 1.8E-08 | 1.4  | 3.6E-02 | 1.6E-01 |
| AT3G53260 | <i>PAL2</i>      | phenylalanine ammonia-lyase 2                                                                                                         | 4.2 | 2.4E-17 | 8.8E-15 | -1.0 | 7.0E-01 | 8.6E-01 |
| AT2G46750 | <i>GulLO2</i>    | D-arabinono-1,4-lactone oxidase family protein                                                                                        | 4.2 | 1.6E-05 | 1.5E-04 | 1.3  | 3.5E-01 | 6.1E-01 |
| AT5G17010 | <i>AT5G17010</i> | Major facilitator superfamily protein                                                                                                 | 4.2 | 1.4E-19 | 8.3E-17 | -1.1 | 2.1E-01 | 4.7E-01 |
| AT4G30650 | <i>AT4G30650</i> | Low temperature and salt responsive protein family                                                                                    | 4.2 | 1.1E-08 | 2.9E-07 | 1.3  | 1.7E-01 | 4.1E-01 |
| AT2G35660 | <i>CTF2A</i>     | FAD/NAD(P)-binding oxidoreductase family protein                                                                                      | 4.2 | 4.4E-16 | 1.1E-13 | 1.3  | 5.4E-03 | 4.9E-02 |
| AT2G24540 | <i>AFR</i>       | Galactose oxidase/kelch repeat superfamily protein                                                                                    | 4.1 | 1.2E-18 | 5.6E-16 | 1.2  | 3.8E-02 | 1.7E-01 |
| AT1G61300 | <i>AT1G61300</i> | LRR and NB-ARC domains-containing disease resistance protein                                                                          | 4.1 | 1.6E-08 | 4.0E-07 | -1.4 | 1.4E-01 | 3.8E-01 |
| AT3G29200 | <i>CM1</i>       | chorismate mutase 1                                                                                                                   | 4.1 | 2.1E-19 | 1.2E-16 | -1.1 | 4.7E-01 | 7.1E-01 |
| AT1G62510 | <i>AT1G62510</i> | Bifunctional inhibitor/lipid-transfer protein/seed storage 2S albumin superfamily protein                                             | 4.1 | 7.8E-08 | 1.5E-06 | -1.5 | 4.0E-02 | 1.8E-01 |
| AT5G44050 | <i>AT5G44050</i> | MATE efflux family protein                                                                                                            | 4.1 | 8.7E-11 | 4.5E-09 | -1.2 | 2.4E-01 | 5.0E-01 |
| AT1G47510 | <i>5PTASE11</i>  | inositol polyphosphate 5-phosphatase 11                                                                                               | 4.1 | 8.6E-04 | 4.3E-03 | 1.1  | 9.1E-01 | 9.7E-01 |
| AT4G17090 | <i>CT-BMY</i>    | chloroplast beta-amylase                                                                                                              | 4.1 | 5.2E-09 | 1.5E-07 | -1.1 | 4.5E-01 | 7.0E-01 |
| AT5G24200 | <i>AT5G24200</i> | alpha/beta-Hydrolases superfamily protein                                                                                             | 4.1 | 8.0E-03 | 2.7E-02 | 3.1  | 3.7E-02 | 1.7E-01 |
| AT4G27820 | <i>BGLU9</i>     | beta glucosidase 9                                                                                                                    | 4.1 | 2.3E-13 | 2.6E-11 | 1.1  | 3.1E-01 | 5.8E-01 |
| AT4G14090 | <i>AT4G14090</i> | UDP-Glycosyltransferase superfamily protein                                                                                           | 4.1 | 1.3E-02 | 4.0E-02 | -1.0 | 9.7E-01 | 9.9E-01 |
| AT2G41660 | <i>MIZ1</i>      | MIZU-KUSSEI-like protein (Protein of unknown function, DUF617)                                                                        | 4.1 | 4.3E-14 | 5.6E-12 | 1.2  | 1.5E-01 | 3.9E-01 |
| AT1G28170 | <i>SOT7</i>      | sulfotransferase 7                                                                                                                    | 4.1 | 1.0E-02 | 3.3E-02 | -1.1 | 8.7E-01 | 9.5E-01 |
| AT4G36530 | <i>AT4G36530</i> | alpha/beta-Hydrolases superfamily protein                                                                                             | 4.0 | 2.2E-15 | 4.1E-13 | 1.1  | 2.1E-01 | 4.6E-01 |
| AT2G37970 | <i>SOUL-1</i>    | SOUL heme-binding family protein                                                                                                      | 4.0 | 3.8E-18 | 1.5E-15 | -1.1 | 3.0E-01 | 5.6E-01 |
| AT1G78510 | <i>SPS1</i>      | solanesyl diphosphate synthase 1                                                                                                      | 4.0 | 1.4E-18 | 6.4E-16 | 1.1  | 5.2E-01 | 7.5E-01 |
| AT1G16720 | <i>HCF173</i>    | high chlorophyll fluorescence phenotype 173                                                                                           | 4.0 | 8.9E-13 | 8.0E-11 | 1.4  | 1.1E-02 | 7.6E-02 |
| AT4G17098 | <i>AT4G17098</i> | Natural antisense transcript overlaps with AT4G17100                                                                                  | 4.0 | 4.2E-10 | 1.7E-08 | 1.4  | 7.2E-02 | 2.5E-01 |
| AT2G36630 | <i>AT2G36630</i> | Sulfite exporter TauE/SafE family protein                                                                                             | 4.0 | 3.8E-13 | 3.9E-11 | 1.2  | 1.1E-01 | 3.2E-01 |
| AT1G70000 | <i>AT1G70000</i> | myb-like transcription factor family protein                                                                                          | 4.0 | 9.8E-17 | 2.9E-14 | 1.1  | 2.1E-01 | 4.6E-01 |
| AT4G29590 | <i>AT4G29590</i> | S-adenosyl-L-methionine-dependent methyltransferases superfamily protein                                                              | 4.0 | 3.3E-18 | 1.3E-15 | 1.1  | 1.3E-01 | 3.6E-01 |
| AT2G05440 | <i>GRP9</i>      | GLYCINE RICH PROTEIN 9                                                                                                                | 4.0 | 1.5E-06 | 1.9E-05 | 1.4  | 1.7E-01 | 4.1E-01 |
| AT3G61220 | <i>SDR1</i>      | NAD(P)-binding Rossmann-fold superfamily protein                                                                                      | 4.0 | 1.6E-15 | 3.3E-13 | -1.0 | 6.8E-01 | 8.5E-01 |
| AT1G62620 | <i>AT1G62620</i> | Flavin-binding monooxygenase family protein                                                                                           | 4.0 | 1.4E-04 | 9.3E-04 | 1.3  | 5.1E-01 | 7.4E-01 |
| AT3G24190 | <i>AT3G24190</i> | Protein kinase superfamily protein                                                                                                    | 4.0 | 3.8E-16 | 9.7E-14 | 1.2  | 8.6E-02 | 2.8E-01 |
| AT2G01580 | <i>AT2G01580</i> | transmembrane protein                                                                                                                 | 4.0 | 5.1E-04 | 2.8E-03 | 1.4  | 4.2E-01 | 6.8E-01 |
| AT5G60540 | <i>PDX2</i>      | pyridoxine biosynthesis 2                                                                                                             | 4.0 | 2.0E-21 | 2.1E-18 | 1.1  | 2.0E-01 | 4.6E-01 |
| AT1G06170 | <i>AT1G06170</i> | basic helix-loop-helix (bHLH) DNA-binding superfamily protein                                                                         | 3.9 | 3.2E-05 | 2.7E-04 | -1.3 | 4.7E-01 | 7.1E-01 |



|           |                   |                                                                          |     |         |         |      |         |         |
|-----------|-------------------|--------------------------------------------------------------------------|-----|---------|---------|------|---------|---------|
| AT5G43860 | <i>CLH2</i>       | chlorophyllase 2                                                         | 3.9 | 1.0E-10 | 5.0E-09 | 1.5  | 2.1E-02 | 1.2E-01 |
| AT2G42150 | <i>AT2G42150</i>  | DNA-binding bromodomain-containing protein                               | 3.9 | 2.3E-06 | 2.9E-05 | -1.8 | 7.5E-02 | 2.6E-01 |
| AT1G72490 | <i>AT1G72490</i>  | hypothetical protein                                                     | 3.9 | 3.7E-06 | 4.3E-05 | -2.3 | 1.1E-02 | 7.7E-02 |
| AT4G01883 | <i>AT4G01883</i>  | Polyketide cyclase / dehydrase and lipid transport protein               | 3.9 | 8.0E-12 | 5.4E-10 | 1.5  | 8.3E-03 | 6.6E-02 |
| AT1G17100 | <i>HBP1</i>       | SOUL heme-binding family protein                                         | 3.9 | 1.6E-15 | 3.3E-13 | -1.0 | 7.2E-01 | 8.8E-01 |
| AT5G11260 | <i>HYS</i>        | Basic-leucine zipper (bZIP) transcription factor family protein          | 3.9 | 9.8E-15 | 1.5E-12 | 1.1  | 3.5E-01 | 6.2E-01 |
| AT5G19850 | <i>AT5G19850</i>  | alpha/beta-Hydrolases superfamily protein                                | 3.9 | 7.2E-15 | 1.2E-12 | 1.4  | 5.5E-03 | 5.0E-02 |
| AT3G54420 | <i>EP3</i>        | homolog of carrot EP3-3 chitinase                                        | 3.9 | 8.1E-09 | 2.2E-07 | -1.1 | 5.3E-01 | 7.5E-01 |
| AT4G26950 | <i>AT4G26950</i>  | senescence regulator (Protein of unknown function, DUF584)               | 3.9 | 3.3E-03 | 1.3E-02 | -3.0 | 1.1E-01 | 3.2E-01 |
| AT3G44720 | <i>ADT4</i>       | arogenate dehydratase 4                                                  | 3.9 | 5.3E-24 | 2.3E-20 | 1.2  | 2.2E-04 | 5.6E-03 |
| AT5G52250 | <i>RUP1</i>       | Transducin/WD40 repeat-like superfamily protein                          | 3.9 | 4.6E-16 | 1.1E-13 | -1.1 | 3.5E-01 | 6.1E-01 |
| AT4G04750 | <i>AT4G04750</i>  | Major facilitator superfamily protein                                    | 3.9 | 2.9E-10 | 1.2E-08 | -1.5 | 2.0E-02 | 1.1E-01 |
| AT1G20120 | <i>AT1G20120</i>  | GDSL-like Lipase/Acylhydrolase superfamily protein                       | 3.9 | 6.0E-03 | 2.2E-02 | 1.5  | 4.4E-01 | 6.9E-01 |
| AT2G46790 | <i>PRR9</i>       | pseudo-response regulator 9                                              | 3.8 | 2.5E-07 | 4.3E-06 | 1.5  | 6.2E-02 | 2.3E-01 |
| AT5G53200 | <i>TRY</i>        | Homeodomain-like superfamily protein                                     | 3.8 | 2.1E-07 | 3.6E-06 | -1.0 | 8.8E-01 | 9.6E-01 |
| AT5G49350 | <i>AT5G49350</i>  | Glycine-rich protein family                                              | 3.8 | 8.0E-03 | 2.7E-02 | 2.4  | 8.9E-02 | 2.9E-01 |
| AT2G45800 | <i>PLIM2a</i>     | GATA type zinc finger transcription factor family protein                | 3.8 | 7.9E-05 | 5.8E-04 | -2.1 | 5.6E-02 | 2.2E-01 |
| AT2G29270 | <i>AT2G29270</i>  | pseudogene of senescence-associated gene 13                              | 3.8 | 3.0E-03 | 1.2E-02 | 1.9  | 1.6E-01 | 4.0E-01 |
| AT4G27570 | <i>AT4G27570</i>  | UDP-Glycosyltransferase superfamily protein                              | 3.8 | 3.8E-03 | 1.5E-02 | -1.3 | 6.0E-01 | 8.0E-01 |
| AT1G55010 | <i>PDF1.5</i>     | plant defensin 1.5                                                       | 3.8 | 3.3E-03 | 1.3E-02 | 3.0  | 1.8E-02 | 1.1E-01 |
| AT5G01410 | <i>RSR4</i>       | Aldolase-type TIM barrel family protein                                  | 3.8 | 8.5E-19 | 4.3E-16 | -1.1 | 3.2E-01 | 5.9E-01 |
| AT2G38465 | <i>AT2G38465</i>  | hypothetical protein                                                     | 3.8 | 1.2E-10 | 5.8E-09 | -1.0 | 9.9E-01 | 1.0E+00 |
| AT2G14060 | <i>AT2G14060</i>  | S-adenosyl-L-methionine-dependent methyltransferases superfamily protein | 3.8 | 3.2E-05 | 2.7E-04 | 1.7  | 6.2E-02 | 2.3E-01 |
| AT4G17480 | <i>AT4G17480</i>  | alpha/beta-Hydrolases superfamily protein                                | 3.8 | 2.2E-03 | 9.2E-03 | 2.2  | 7.4E-02 | 2.6E-01 |
| AT3G14690 | <i>CYP72A15</i>   | cytochrome P450, family 72, subfamily A, polypeptide 15                  | 3.8 | 1.0E-20 | 7.8E-18 | 1.0  | 6.8E-01 | 8.5E-01 |
| AT1G03055 | <i>D27</i>        | beta-carotene isomerase D27-like protein                                 | 3.8 | 9.9E-07 | 1.4E-05 | 1.2  | 3.6E-01 | 6.2E-01 |
| AT4G36220 | <i>FAH1</i>       | ferulic acid 5-hydroxylase 1                                             | 3.8 | 9.4E-14 | 1.1E-11 | 1.0  | 9.5E-01 | 9.8E-01 |
| AT3G28160 | <i>AT3G28160</i>  | transposable_element_gene                                                | 3.8 | 8.6E-15 | 1.3E-12 | 1.4  | 7.6E-04 | 1.3E-02 |
| AT1G66780 | <i>AT1G66780</i>  | MATE efflux family protein                                               | 3.8 | 2.4E-03 | 1.0E-02 | -1.9 | 2.8E-01 | 5.4E-01 |
| AT5G54710 | <i>AT5G54710</i>  | Ankyrin repeat family protein                                            | 3.8 | 3.5E-08 | 7.8E-07 | -1.1 | 5.3E-01 | 7.6E-01 |
| AT3G06220 | <i>AT3G06220</i>  | AP2/B3-like transcriptional factor family protein                        | 3.7 | 1.1E-02 | 3.4E-02 | 2.7  | 5.6E-02 | 2.2E-01 |
| AT5G54720 | <i>AT5G54720</i>  | Ankyrin repeat family protein                                            | 3.7 | 5.4E-06 | 5.9E-05 | 1.0  | 9.7E-01 | 9.9E-01 |
| AT4G15810 | <i>AT4G15810</i>  | P-loop containing nucleoside triphosphate hydrolases superfamily protein | 3.7 | 2.3E-12 | 1.8E-10 | 1.0  | 7.2E-01 | 8.8E-01 |
| AT1G17600 | <i>AT1G17600</i>  | Disease resistance protein (TIR-NBS-LRR class)                           | 3.7 | 8.9E-05 | 6.4E-04 | 1.7  | 1.2E-01 | 3.4E-01 |
| AT3G09650 | <i>HCF152</i>     | Tetratricopeptide repeat (TPR)-like superfamily protein                  | 3.7 | 1.2E-14 | 1.8E-12 | 1.1  | 1.9E-01 | 4.4E-01 |
| AT4G12830 | <i>AT4G12830</i>  | alpha/beta-Hydrolases superfamily protein                                | 3.7 | 1.1E-08 | 3.0E-07 | -1.1 | 5.4E-01 | 7.6E-01 |
| AT1G17050 | <i>SPS2</i>       | solaneyl diphosphate synthase 2                                          | 3.7 | 4.0E-15 | 7.0E-13 | 1.2  | 1.1E-01 | 3.3E-01 |
| AT1G19140 | <i>AT1G19140</i>  | ubiquinone biosynthesis COQ9-like protein                                | 3.7 | 2.5E-16 | 6.7E-14 | 1.0  | 7.7E-01 | 9.0E-01 |
| AT4G37310 | <i>CYP81H1</i>    | cytochrome P450, family 81, subfamily H, polypeptide 1                   | 3.7 | 1.7E-15 | 3.3E-13 | 1.1  | 3.8E-01 | 6.4E-01 |
| AT1G06550 | <i>AT1G06550</i>  | ATP-dependent caseinolytic (Clp) protease/crotonase family protein       | 3.7 | 2.8E-20 | 1.9E-17 | -1.1 | 1.4E-01 | 3.7E-01 |
| AT3G56890 | <i>AT3G56890</i>  | F-box associated ubiquitination effector family protein                  | 3.7 | 4.9E-06 | 5.5E-05 | -1.7 | 1.3E-01 | 3.5E-01 |
| AT1G79510 | <i>AT1G79510</i>  | hypothetical protein (DUF2358)                                           | 3.6 | 1.3E-11 | 8.4E-10 | 1.1  | 5.8E-01 | 7.9E-01 |
| AT2G39560 | <i>AT2G39560</i>  | Putative membrane lipoprotein                                            | 3.6 | 4.2E-08 | 9.1E-07 | 1.7  | 6.9E-03 | 5.8E-02 |
| AT1G64770 | <i>PnsB2</i>      | NDH-dependent cyclic electron flow 1                                     | 3.6 | 1.2E-12 | 1.1E-10 | 1.4  | 1.3E-02 | 8.9E-02 |
| AT5G57785 | <i>AT5G57785</i>  | hypothetical protein                                                     | 3.6 | 2.1E-09 | 7.0E-08 | -1.1 | 5.1E-01 | 7.4E-01 |
| AT1G33720 | <i>CYP76C6</i>    | cytochrome P450, family 76, subfamily C, polypeptide 6                   | 3.6 | 1.9E-04 | 1.2E-03 | 1.6  | 1.6E-01 | 4.0E-01 |
| AT3G21670 | <i>AT3G21670</i>  | Major facilitator superfamily protein                                    | 3.6 | 1.2E-07 | 2.2E-06 | 1.2  | 2.8E-01 | 5.5E-01 |
| AT3G23410 | <i>FAO3</i>       | fatty alcohol oxidase 3                                                  | 3.6 | 1.6E-14 | 2.4E-12 | 1.6  | 2.5E-05 | 1.2E-03 |
| AT2G45360 | <i>AT2G45360</i>  | ankyrin repeat/KH domain protein (DUF1442)                               | 3.6 | 3.0E-06 | 3.6E-05 | -1.0 | 1.0E+00 | 1.0E+00 |
| AT1G60270 | <i>BGLU6</i>      | beta glucosidase 6                                                       | 3.6 | 8.3E-09 | 2.3E-07 | -1.9 | 9.2E-04 | 1.5E-02 |
| AT3G57190 | <i>PrfB3</i>      | peptide chain release factor                                             | 3.6 | 5.2E-14 | 6.5E-12 | 1.1  | 2.9E-01 | 5.6E-01 |
| AT1G09340 | <i>CRB</i>        | chloroplast RNA binding protein                                          | 3.5 | 5.3E-11 | 2.9E-09 | 1.2  | 1.4E-01 | 3.8E-01 |
| AT2G32640 | <i>AT2G32640</i>  | Lycopene beta/epsilon cyclase protein                                    | 3.5 | 9.4E-12 | 6.2E-10 | -1.1 | 6.7E-01 | 8.5E-01 |
| AT4G33660 | <i>AT4G33660</i>  | cysteine-rich TM module stress tolerance protein                         | 3.5 | 9.1E-12 | 6.0E-10 | 1.3  | 7.5E-02 | 2.6E-01 |
| AT4G25700 | <i>BETA-OHASE</i> | beta-hydroxylase 1                                                       | 3.5 | 1.9E-15 | 3.7E-13 | 1.2  | 7.7E-02 | 2.6E-01 |
| AT4G24130 | <i>AT4G24130</i>  | DUF538 family protein (Protein of unknown function, DUF538)              | 3.5 | 1.1E-08 | 2.9E-07 | 1.0  | 9.7E-01 | 9.9E-01 |
| AT3G49630 | <i>AT3G49630</i>  | 2-oxoglutarate (2OG) and Fe(II)-dependent oxygenase superfamily protein  | 3.5 | 7.9E-03 | 2.7E-02 | 2.2  | 1.0E-01 | 3.1E-01 |
| AT2G26080 | <i>GLDP2</i>      | glycine decarboxylase P-protein 2                                        | 3.5 | 5.5E-13 | 5.5E-11 | 1.0  | 8.4E-01 | 9.4E-01 |
| AT3G04420 | <i>NAC048</i>     | NAC domain containing protein 48                                         | 3.5 | 1.0E-04 | 7.3E-04 | -1.1 | 7.4E-01 | 8.9E-01 |
| AT5G51040 | <i>SDHAF2</i>     | succinate dehydrogenase assembly factor                                  | 3.5 | 2.6E-17 | 8.9E-15 | -1.0 | 8.5E-01 | 9.5E-01 |
| AT1G07150 | <i>MAPKKK13</i>   | mitogen-activated protein kinase kinase kinase 13                        | 3.5 | 1.8E-18 | 7.5E-16 | 1.3  | 3.7E-04 | 8.0E-03 |
| AT5G54470 | <i>BBX29</i>      | B-box type zinc finger family protein                                    | 3.5 | 2.2E-05 | 1.9E-04 | -1.3 | 3.2E-01 | 5.8E-01 |
| AT5G51220 | <i>AT5G51220</i>  | ubiquinol-cytochrome C chaperone family protein                          | 3.5 | 2.3E-16 | 6.3E-14 | 1.1  | 3.1E-01 | 5.8E-01 |
| AT2G25780 | <i>AT2G25780</i>  | hypothetical protein (DUF1677)                                           | 3.5 | 8.3E-03 | 2.8E-02 | 2.2  | 9.8E-02 | 3.0E-01 |
| AT3G47070 | <i>AT3G47070</i>  | thylakoid soluble phosphoprotein                                         | 3.5 | 3.2E-12 | 2.4E-10 | 1.1  | 3.3E-01 | 5.9E-01 |
| AT1G47980 | <i>AT1G47980</i>  | desiccation-like protein                                                 | 3.5 | 3.5E-04 | 2.0E-03 | -1.4 | 3.1E-01 | 5.7E-01 |
| AT1G52342 | <i>AT1G52342</i>  | hypothetical protein                                                     | 3.5 | 1.0E-11 | 6.7E-10 | 1.1  | 5.2E-01 | 7.5E-01 |
| AT5G42270 | <i>VAR1</i>       | FtsH extracellular protease family                                       | 3.5 | 5.4E-14 | 6.7E-12 | 1.2  | 3.4E-02 | 1.6E-01 |
| AT2G36800 | <i>DOG1</i>       | don-glucosyltransferase 1                                                | 3.4 | 1.8E-11 | 1.1E-09 | -1.3 | 5.2E-02 | 2.1E-01 |

|           |           |                                                                                                 |     |         |         |      |         |         |
|-----------|-----------|-------------------------------------------------------------------------------------------------|-----|---------|---------|------|---------|---------|
| AT2G29300 | AT2G29300 | NAD(P)-binding Rossmann-fold superfamily protein                                                | 3.4 | 2.0E-08 | 4.8E-07 | 1.9  | 5.2E-04 | 1.0E-02 |
| AT2G24190 | SDR2      | NAD(P)-binding Rossmann-fold superfamily protein                                                | 3.4 | 4.2E-09 | 1.3E-07 | -1.2 | 2.7E-01 | 5.3E-01 |
| AT2G16365 | AT2G16365 | F-box family protein                                                                            | 3.4 | 7.2E-19 | 3.7E-16 | 1.0  | 6.9E-01 | 8.6E-01 |
| AT1G24148 | AT1G24148 | hypothetical protein                                                                            | 3.4 | 5.6E-07 | 8.6E-06 | 1.2  | 4.6E-01 | 7.1E-01 |
| AT5G54100 | AT5G54100 | SPFH/Band 7/PHB domain-containing membrane-associated protein family                            | 3.4 | 9.0E-21 | 7.2E-18 | 1.1  | 3.1E-02 | 1.5E-01 |
| AT2G37720 | TBL15     | TRICHOME BIREFRINGENCE-LIKE 15                                                                  | 3.4 | 9.9E-05 | 7.0E-04 | 1.1  | 8.4E-01 | 9.4E-01 |
| AT4G17760 | AT4G17760 | PCNA domain-containing protein                                                                  | 3.4 | 1.8E-08 | 4.4E-07 | 1.0  | 9.8E-01 | 1.0E+00 |
| AT5G14760 | AO        | L-aspartate oxidase                                                                             | 3.4 | 2.5E-12 | 2.0E-10 | -1.4 | 9.5E-03 | 7.1E-02 |
| AT3G09930 | AT3G09930 | GDSL-like Lipase/Acylhydrolase superfamily protein                                              | 3.4 | 6.7E-03 | 2.3E-02 | 1.1  | 8.8E-01 | 9.6E-01 |
| AT3G01140 | MYB106    | myb domain protein 106                                                                          | 3.4 | 6.4E-07 | 9.6E-06 | -1.2 | 3.5E-01 | 6.2E-01 |
| AT3G48460 | AT3G48460 | GDSL-like Lipase/Acylhydrolase superfamily protein                                              | 3.4 | 1.4E-15 | 2.9E-13 | -1.6 | 3.3E-05 | 1.5E-03 |
| AT2G40080 | ELF4      | EARLY FLOWERING-like protein (DUF1313)                                                          | 3.4 | 4.7E-13 | 4.7E-11 | 1.2  | 4.8E-02 | 2.0E-01 |
| AT2G18120 | SRS4      | SHI-related sequence 4                                                                          | 3.3 | 7.1E-05 | 5.3E-04 | 1.5  | 1.8E-01 | 4.3E-01 |
| AT4G27657 | AT4G27657 | hypothetical protein                                                                            | 3.3 | 4.9E-08 | 1.0E-06 | 1.2  | 3.4E-01 | 6.1E-01 |
| AT2G40150 | TBL28     | TRICHOME BIREFRINGENCE-LIKE 28                                                                  | 3.3 | 8.5E-16 | 1.9E-13 | 1.0  | 9.9E-01 | 1.0E+00 |
| AT5G20220 | AT5G20220 | zinc knuckle (CCHC-type) family protein                                                         | 3.3 | 2.7E-15 | 5.0E-13 | 1.2  | 1.2E-01 | 3.3E-01 |
| AT1G67070 | DIN9      | Mannose-6-phosphate isomerase, type I                                                           | 3.3 | 2.9E-16 | 7.6E-14 | -1.1 | 2.8E-01 | 5.5E-01 |
| AT4G28660 | PSB28     | photosystem II reaction center PSB28 protein                                                    | 3.3 | 9.7E-10 | 3.6E-08 | 1.2  | 1.7E-01 | 4.1E-01 |
| AT3G16350 | AT3G16350 | Homeodomain-like superfamily protein                                                            | 3.3 | 7.8E-16 | 1.8E-13 | 1.2  | 1.1E-01 | 3.2E-01 |
| AT1G51820 | AT1G51820 | Leucine-rich repeat protein kinase family protein                                               | 3.3 | 7.0E-05 | 5.2E-04 | 1.0  | 9.4E-01 | 9.8E-01 |
| AT3G23530 | AT3G23530 | Cyclopropane-fatty-acyl-phospholipid synthase                                                   | 3.3 | 1.1E-12 | 9.8E-11 | 1.3  | 2.7E-02 | 1.4E-01 |
| AT5G67370 | CGLD27    | DUF1230 family protein (DUF1230)                                                                | 3.3 | 3.2E-09 | 1.0E-07 | -1.1 | 6.9E-01 | 8.6E-01 |
| AT1G53670 | MSRB1     | methionine sulfoxide reductase B 1                                                              | 3.3 | 4.9E-17 | 1.6E-14 | 1.1  | 2.7E-01 | 5.3E-01 |
| AT4G11600 | GPX6      | glutathione peroxidase 6                                                                        | 3.3 | 3.2E-14 | 4.3E-12 | 1.0  | 6.6E-01 | 8.4E-01 |
| AT5G65730 | XTH6      | xyloglucan endotransglucosylase/hydrolase 6                                                     | 3.3 | 1.2E-05 | 1.1E-04 | 1.2  | 4.9E-01 | 7.3E-01 |
| AT5G24160 | SQE6      | squalene monooxygenase 6                                                                        | 3.3 | 3.8E-05 | 3.1E-04 | 1.6  | 8.9E-02 | 2.9E-01 |
| AT5G45630 | AT5G45630 | senescence regulator (Protein of unknown function, DUF584)                                      | 3.3 | 1.5E-03 | 6.9E-03 | -1.6 | 3.2E-01 | 5.8E-01 |
| AT5G06790 | AT5G06790 | cotton fiber protein                                                                            | 3.3 | 1.3E-05 | 1.3E-04 | 1.4  | 1.6E-01 | 4.0E-01 |
| AT1G13670 | AT1G13670 | hypothetical protein                                                                            | 3.3 | 3.5E-13 | 3.6E-11 | 1.1  | 3.4E-01 | 6.1E-01 |
| AT1G78820 | AT1G78820 | D-mannose binding lectin protein with Apple-like carbohydrate-binding domain-containing protein | 3.3 | 3.8E-09 | 1.2E-07 | -1.0 | 8.0E-01 | 9.2E-01 |
| AT5G66940 | AT5G66940 | Dof-type zinc finger DNA-binding family protein                                                 | 3.3 | 2.0E-03 | 8.6E-03 | 2.5  | 1.7E-02 | 1.0E-01 |
| AT2G47890 | AT2G47890 | B-box type zinc finger protein with CCT domain-containing protein                               | 3.3 | 2.1E-13 | 2.4E-11 | 1.1  | 4.6E-01 | 7.0E-01 |
| AT5G22390 | AT5G22390 | FANTASTIC four-like protein (DUF3049)                                                           | 3.3 | 8.7E-11 | 4.4E-09 | 1.6  | 7.1E-04 | 1.3E-02 |
| AT3G09520 | EXO70H4   | exocyst subunit exo70 family protein H4                                                         | 3.3 | 2.1E-08 | 5.0E-07 | -1.1 | 6.3E-01 | 8.2E-01 |
| AT3G18950 | AT3G18950 | Transducin/WD40 repeat-like superfamily protein                                                 | 3.3 | 6.3E-08 | 1.3E-06 | -1.3 | 1.5E-01 | 3.9E-01 |
| AT5G43840 | HSFA6A    | heat shock transcription factor A6A                                                             | 3.3 | 7.1E-09 | 2.0E-07 | 1.1  | 4.0E-01 | 6.6E-01 |
| AT5G62150 | AT5G62150 | peptidoglycan-binding LysM domain-containing protein                                            | 3.3 | 2.5E-06 | 3.1E-05 | 1.2  | 3.6E-01 | 6.2E-01 |
| AT1G50020 | AT1G50020 | tubulin alpha-6 chain                                                                           | 3.3 | 2.2E-13 | 2.5E-11 | 1.1  | 3.0E-01 | 5.7E-01 |
| AT2G30040 | MAPKKK14  | mitogen-activated protein kinase kinase kinase 14                                               | 3.3 | 3.0E-15 | 5.5E-13 | 1.0  | 8.5E-01 | 9.4E-01 |
| AT3G16360 | AHP4      | HPT phosphotransmitter 4                                                                        | 3.3 | 6.1E-05 | 4.7E-04 | -1.2 | 5.5E-01 | 7.7E-01 |
| AT1G66330 | AT1G66330 | senescence-associated family protein                                                            | 3.3 | 2.1E-14 | 3.0E-12 | 1.2  | 1.2E-01 | 3.3E-01 |
| AT1G50450 | AT1G50450 | Saccharopine dehydrogenase                                                                      | 3.2 | 1.6E-13 | 1.9E-11 | 1.3  | 6.4E-03 | 5.5E-02 |
| AT2G38230 | PDX1.1    | pyridoxine biosynthesis 1.1                                                                     | 3.2 | 2.4E-12 | 1.9E-10 | 1.1  | 2.9E-01 | 5.5E-01 |
| AT3G18485 | ILR2      | iaa-leucine resistant 2                                                                         | 3.2 | 1.2E-05 | 1.1E-04 | -1.2 | 4.2E-01 | 6.7E-01 |
| AT3G15830 | AT3G15830 | phosphatidic acid phosphatase-related / PAP2-like protein                                       | 3.2 | 1.1E-02 | 3.4E-02 | 1.5  | 4.1E-01 | 6.6E-01 |
| AT4G19820 | AT4G19820 | Glycosyl hydrolase family protein with chitinase insertion domain-containing protein            | 3.2 | 9.3E-09 | 2.5E-07 | 1.5  | 2.3E-02 | 1.3E-01 |
| AT4G00050 | UNE10     | basic helix-loop-helix (bHLH) DNA-binding superfamily protein                                   | 3.2 | 2.1E-17 | 8.0E-15 | -1.5 | 3.3E-06 | 3.2E-04 |
| AT3G46480 | AT3G46480 | 2-oxoglutarate (2OG) and Fe(II)-dependent oxygenase superfamily protein                         | 3.2 | 3.5E-04 | 2.0E-03 | 1.6  | 1.4E-01 | 3.7E-01 |
| AT3G52130 | AT3G52130 | Bifunctional inhibitor/lipid-transfer protein/seed storage 2S albumin superfamily protein       | 3.2 | 7.6E-03 | 2.6E-02 | -2.8 | 1.0E-01 | 3.1E-01 |
| AT1G70580 | AOAT2     | alanine-2-oxoglutarate aminotransferase 2                                                       | 3.2 | 2.7E-13 | 2.9E-11 | 1.3  | 9.9E-03 | 7.3E-02 |
| AT3G48310 | CYP71A22  | cytochrome P450, family 71, subfamily A, polypeptide 22                                         | 3.2 | 9.5E-06 | 9.6E-05 | -1.4 | 2.0E-01 | 4.6E-01 |
| AT2G23590 | MES8      | methyl esterase 8                                                                               | 3.2 | 1.4E-07 | 2.5E-06 | -1.3 | 2.1E-01 | 4.7E-01 |
| AT3G55110 | ABCG18    | ABC-2 type transporter family protein                                                           | 3.2 | 1.3E-05 | 1.3E-04 | 1.4  | 1.9E-01 | 4.4E-01 |
| AT2G33250 | AT2G33250 | transmembrane protein                                                                           | 3.2 | 7.9E-13 | 7.4E-11 | 1.3  | 2.5E-02 | 1.3E-01 |
| AT1G70820 | AT1G70820 | phosphoglucomutase, putative / glucose phosphomutase                                            | 3.2 | 2.8E-06 | 3.5E-05 | 1.9  | 4.2E-03 | 4.2E-02 |
| AT4G08870 | ARGAH2    | Arginase/deacetylase superfamily protein                                                        | 3.2 | 9.5E-10 | 3.5E-08 | 1.1  | 5.2E-01 | 7.5E-01 |
| AT2G48150 | GPX4      | glutathione peroxidase 4                                                                        | 3.2 | 9.4E-03 | 3.1E-02 | 3.0  | 1.2E-02 | 8.4E-02 |
| AT2G39730 | RCA       | rubisco activase                                                                                | 3.1 | 5.7E-10 | 2.2E-08 | 1.4  | 2.3E-02 | 1.3E-01 |
| AT1G79600 | AT1G79600 | Protein kinase superfamily protein                                                              | 3.1 | 3.8E-16 | 9.7E-14 | 1.2  | 2.0E-02 | 1.2E-01 |
| AT5G46800 | BOU       | Mitochondrial substrate carrier family protein                                                  | 3.1 | 4.6E-14 | 5.9E-12 | 1.1  | 4.7E-01 | 7.1E-01 |
| AT5G08710 | RUG1      | Regulator of chromosome condensation (RCC1) family protein                                      | 3.1 | 2.3E-16 | 6.3E-14 | 1.0  | 8.1E-01 | 9.2E-01 |
| AT3G22830 | HSFA6B    | heat shock transcription factor A6B                                                             | 3.1 | 1.3E-07 | 2.4E-06 | 1.3  | 2.2E-01 | 4.8E-01 |
| AT4G23170 | EP1       | receptor-like protein kinase-related family protein                                             | 3.1 | 7.2E-03 | 2.5E-02 | 1.7  | 2.1E-01 | 4.7E-01 |
| AT4G16750 | AT4G16750 | Integrase-type DNA-binding superfamily protein                                                  | 3.1 | 7.4E-09 | 2.1E-07 | -1.3 | 1.6E-01 | 4.0E-01 |
| AT1G06430 | FTSH8     | FTSH protease 8                                                                                 | 3.1 | 5.9E-13 | 5.7E-11 | 1.1  | 2.4E-01 | 5.1E-01 |
| AT1G65620 | AS2       | Lateral organ boundaries (LOB) domain family protein                                            | 3.1 | 2.0E-05 | 1.8E-04 | 1.7  | 3.4E-02 | 1.6E-01 |
| AT3G03780 | MS2       | methionine synthase 2                                                                           | 3.1 | 9.4E-16 | 2.1E-13 | -1.2 | 2.8E-02 | 1.4E-01 |
| AT5G67030 | ABA1      | zeaxanthin epoxidase (ZEP) (ABA1)                                                               | 3.1 | 2.8E-10 | 1.2E-08 | 1.1  | 3.0E-01 | 5.7E-01 |
| AT3G21690 | AT3G21690 | MATE efflux family protein                                                                      | 3.1 | 7.9E-14 | 9.6E-12 | -1.2 | 4.9E-02 | 2.0E-01 |

|           |                   |                                                                                              |     |         |         |      |         |         |
|-----------|-------------------|----------------------------------------------------------------------------------------------|-----|---------|---------|------|---------|---------|
| AT3G17609 | <i>HYH</i>        | HY5-homolog                                                                                  | 3.1 | 2.4E-09 | 7.7E-08 | 1.2  | 1.2E-01 | 3.4E-01 |
| AT4G35250 | <i>HCF244</i>     | NAD(P)-binding Rossmann-fold superfamily protein                                             | 3.1 | 1.2E-11 | 7.8E-10 | 1.3  | 1.8E-02 | 1.1E-01 |
| AT1G44575 | <i>NPQ4</i>       | Chlorophyll A-B binding family protein                                                       | 3.1 | 6.6E-13 | 6.2E-11 | 1.3  | 2.7E-02 | 1.4E-01 |
| AT2G17270 | <i>PHT3</i>       |                                                                                              | 3.1 | 6.6E-13 | 6.2E-11 | 1.1  | 3.5E-01 | 6.1E-01 |
| AT1G31800 | <i>CYP97A3</i>    | cytochrome P450, family 97, subfamily A, polypeptide 3                                       | 3.1 | 3.2E-09 | 1.0E-07 | 1.2  | 2.2E-01 | 4.8E-01 |
| AT4G12917 | <i>AT4G12917</i>  |                                                                                              | 3.1 | 1.1E-03 | 5.3E-03 | 1.2  | 6.5E-01 | 8.3E-01 |
| AT1G69523 | <i>AT1G69523</i>  | S-adenosyl-L-methionine-dependent methyltransferases superfamily protein                     | 3.1 | 2.5E-08 | 5.9E-07 | 1.0  | 9.5E-01 | 9.9E-01 |
| AT1G32220 | <i>AT1G32220</i>  | NAD(P)-binding Rossmann-fold superfamily protein                                             | 3.1 | 3.7E-12 | 2.8E-10 | 1.1  | 3.5E-01 | 6.1E-01 |
| AT1G18060 | <i>AT1G18060</i>  | microbial collagenase                                                                        | 3.1 | 2.6E-12 | 2.1E-10 | 1.1  | 3.9E-01 | 6.5E-01 |
| AT3G47430 | <i>PEX11B</i>     | peroxin 11B                                                                                  | 3.1 | 2.7E-12 | 2.1E-10 | 1.2  | 5.9E-02 | 2.2E-01 |
| AT1G49405 | <i>AT1G49405</i>  | Uncharacterized protein family (UPF0497)                                                     | 3.0 | 1.4E-03 | 6.4E-03 | 1.7  | 1.1E-01 | 3.3E-01 |
| AT3G49320 | <i>AT3G49320</i>  | Metal-dependent protein hydrolase                                                            | 3.0 | 3.0E-08 | 6.8E-07 | 1.3  | 1.3E-01 | 3.5E-01 |
| AT4G33666 | <i>AT4G33666</i>  | hypothetical protein                                                                         | 3.0 | 4.2E-09 | 1.3E-07 | 1.4  | 1.8E-02 | 1.1E-01 |
| AT2G25450 | <i>AT2G25450</i>  | 2-oxoglutarate (2OG) and Fe(II)-dependent oxygenase superfamily protein                      | 3.0 | 2.8E-11 | 1.6E-09 | -1.6 | 1.8E-04 | 4.9E-03 |
| AT3G58150 | <i>AT3G58150</i>  | Optic atrophy 3 protein (OPA3)                                                               | 3.0 | 4.1E-03 | 1.6E-02 | 1.8  | 1.3E-01 | 3.6E-01 |
| AT1G76110 | <i>AT1G76110</i>  | HMG (high mobility group) box protein with ARID/BRIGHT DNA-binding domain-containing protein | 3.0 | 1.1E-09 | 4.1E-08 | 1.8  | 1.1E-04 | 3.3E-03 |
| AT2G35700 | <i>ERF38</i>      | ERF family protein 38                                                                        | 3.0 | 8.6E-04 | 4.3E-03 | -1.2 | 6.4E-01 | 8.3E-01 |
| AT5G16350 | <i>AT5G16350</i>  | O-acyltransferase (WSD1-like) family protein                                                 | 3.0 | 1.3E-06 | 1.8E-05 | -1.1 | 6.3E-01 | 8.2E-01 |
| AT3G57520 | <i>SIP2</i>       | seed imbibition 2                                                                            | 3.0 | 1.8E-09 | 6.1E-08 | -1.7 | 3.9E-04 | 8.3E-03 |
| AT3G13061 | <i>AT3G13061</i>  | Natural antisense transcript overlaps with AT3G13060                                         | 3.0 | 1.8E-08 | 4.4E-07 | 1.2  | 3.6E-01 | 6.2E-01 |
| AT5G59820 | <i>RHL41</i>      | C2H2-type zinc finger family protein                                                         | 3.0 | 1.1E-06 | 1.5E-05 | 1.2  | 4.5E-01 | 7.0E-01 |
| AT2G34060 | <i>AT2G34060</i>  | Peroxidase superfamily protein                                                               | 3.0 | 6.2E-10 | 2.4E-08 | 1.5  | 4.8E-03 | 4.5E-02 |
| AT1G78600 | <i>LZF1</i>       | light-regulated zinc finger protein 1                                                        | 3.0 | 8.8E-13 | 8.0E-11 | 1.1  | 2.2E-01 | 4.7E-01 |
| AT1G29700 | <i>AT1G29700</i>  | Metallo-hydrolase/oxidoreductase superfamily protein                                         | 3.0 | 6.2E-10 | 2.4E-08 | 1.5  | 2.9E-03 | 3.3E-02 |
| AT2G27820 | <i>PD1</i>        | prephenate dehydratase 1                                                                     | 3.0 | 3.3E-19 | 1.8E-16 | -1.1 | 4.2E-01 | 6.7E-01 |
| AT2G40100 | <i>LHCB4.3</i>    | light harvesting complex photosystem II                                                      | 3.0 | 6.5E-12 | 4.5E-10 | 1.0  | 8.1E-01 | 9.2E-01 |
| AT2G21280 | <i>SULA</i>       | NAD(P)-binding Rossmann-fold superfamily protein                                             | 3.0 | 1.1E-12 | 1.0E-10 | 1.2  | 4.2E-02 | 1.8E-01 |
| AT1G69310 | <i>WRKY57</i>     | WRKY DNA-binding protein 57                                                                  | 3.0 | 7.1E-15 | 1.2E-12 | -1.2 | 5.0E-02 | 2.0E-01 |
| AT4G37930 | <i>SHM1</i>       | serine transhydroxymethyltransferase 1                                                       | 3.0 | 1.9E-10 | 8.7E-09 | 1.1  | 3.3E-01 | 6.0E-01 |
| AT1G22690 | <i>AT1G22690</i>  | Gibberellin-regulated family protein                                                         | 3.0 | 8.0E-06 | 8.3E-05 | -1.1 | 6.4E-01 | 8.3E-01 |
| AT5G10470 | <i>KAC1</i>       | kinesin like protein for actin based chloroplast movement 1                                  | 3.0 | 2.7E-13 | 2.9E-11 | 1.1  | 2.2E-01 | 4.8E-01 |
| AT4G18810 | <i>AT4G18810</i>  | NAD(P)-binding Rossmann-fold superfamily protein                                             | 3.0 | 1.9E-09 | 6.5E-08 | 1.2  | 1.5E-01 | 3.8E-01 |
| AT3G47780 | <i>ABCA7</i>      | ABC2 homolog 6                                                                               | 3.0 | 1.1E-14 | 1.7E-12 | -1.2 | 1.0E-01 | 3.1E-01 |
| AT2G38380 | <i>AT2G38380</i>  | Peroxidase superfamily protein                                                               | 3.0 | 2.6E-06 | 3.2E-05 | 1.1  | 7.0E-01 | 8.7E-01 |
| AT1G21140 | <i>AT1G21140</i>  | Vacuolar iron transporter (VIT) family protein                                               | 3.0 | 4.2E-04 | 2.4E-03 | 1.2  | 5.4E-01 | 7.6E-01 |
| AT3G48320 | <i>CYP71A21</i>   | cytochrome P450, family 71, subfamily A, polypeptide 21                                      | 3.0 | 4.6E-07 | 7.2E-06 | 1.1  | 7.2E-01 | 8.8E-01 |
| AT3G22370 | <i>AOX1A</i>      | alternative oxidase 1A                                                                       | 3.0 | 1.3E-11 | 8.3E-10 | -1.3 | 3.6E-02 | 1.6E-01 |
| AT3G01990 | <i>ACR6</i>       | ACT domain repeat 6                                                                          | 3.0 | 3.0E-08 | 6.8E-07 | -1.1 | 4.5E-01 | 7.0E-01 |
| AT4G15248 | <i>BBX30</i>      | B-box type zinc finger family protein                                                        | 3.0 | 4.7E-05 | 3.7E-04 | -1.4 | 1.6E-01 | 4.0E-01 |
| AT1G66840 | <i>PMI2</i>       | PLASTID MOVEMENT IMPAIRED protein (DUF827)                                                   | 2.9 | 5.1E-12 | 3.7E-10 | 1.1  | 2.9E-01 | 5.6E-01 |
| AT2G34180 | <i>CIPK13</i>     | CBL-interacting protein kinase 13                                                            | 2.9 | 1.1E-04 | 7.4E-04 | -1.2 | 4.9E-01 | 7.2E-01 |
| AT2G18328 | <i>RL4</i>        | RAD-like 4                                                                                   | 2.9 | 1.1E-04 | 7.9E-04 | 1.3  | 3.2E-01 | 5.9E-01 |
| AT1G73990 | <i>SPPA</i>       | signal peptide peptidase                                                                     | 2.9 | 1.5E-16 | 4.5E-14 | 1.2  | 2.8E-02 | 1.4E-01 |
| AT2G32390 | <i>GLR3.5</i>     | glutamate receptor 3.5                                                                       | 2.9 | 3.3E-11 | 1.9E-09 | 1.5  | 2.0E-03 | 2.5E-02 |
| AT5G41740 | <i>AT5G41740</i>  | Disease resistance protein (TIR-NBS-LRR class)                                               | 2.9 | 8.3E-06 | 8.6E-05 | 1.7  | 1.2E-02 | 8.1E-02 |
| AT5G36925 | <i>AT5G36925</i>  | hypothetical protein                                                                         | 2.9 | 2.3E-03 | 9.7E-03 | -1.5 | 2.9E-01 | 5.6E-01 |
| AT1G12250 | <i>AT1G12250</i>  | Pentapeptide repeat-containing protein                                                       | 2.9 | 5.5E-12 | 3.9E-10 | 1.1  | 2.0E-01 | 4.5E-01 |
| AT2G41000 | <i>AT2G41000</i>  | Chaperone DnaJ-domain superfamily protein                                                    | 2.9 | 1.2E-14 | 1.8E-12 | 1.0  | 8.5E-01 | 9.4E-01 |
| AT3G50560 | <i>AT3G50560</i>  | NAD(P)-binding Rossmann-fold superfamily protein                                             | 2.9 | 5.6E-10 | 2.2E-08 | -1.2 | 2.1E-01 | 4.7E-01 |
| AT5G18670 | <i>BMY3</i>       | beta-amylase 3                                                                               | 2.9 | 3.1E-14 | 4.1E-12 | -1.2 | 3.7E-02 | 1.7E-01 |
| AT4G23450 | <i>AIRP1</i>      | RING/U-box superfamily protein                                                               | 2.9 | 4.0E-08 | 8.7E-07 | 1.0  | 9.9E-01 | 1.0E+00 |
| AT4G18220 | <i>AT4G18220</i>  | Drug/metabolite transporter superfamily protein                                              | 2.9 | 2.2E-07 | 3.8E-06 | 1.2  | 3.1E-01 | 5.8E-01 |
| AT1G54575 | <i>AT1G54575</i>  | hypothetical protein                                                                         | 2.9 | 1.2E-06 | 1.6E-05 | 1.5  | 5.0E-02 | 2.0E-01 |
| AT1G65860 | <i>FMO GS-OX1</i> | flavin-monooxygenase glucosinolate S-oxygenase 1                                             | 2.9 | 3.4E-04 | 2.0E-03 | -1.4 | 2.6E-01 | 5.2E-01 |
| AT3G26570 | <i>PHT2</i>       |                                                                                              | 2.9 | 3.8E-12 | 2.8E-10 | 1.2  | 7.1E-02 | 2.5E-01 |
| AT5G35970 | <i>AT5G35970</i>  | P-loop containing nucleoside triphosphate hydrolases superfamily protein                     | 2.9 | 3.8E-09 | 1.2E-07 | 1.3  | 5.8E-02 | 2.2E-01 |
| AT4G15630 | <i>AT4G15630</i>  | Uncharacterized protein family (UPF0497)                                                     | 2.9 | 1.6E-07 | 2.9E-06 | 1.1  | 6.4E-01 | 8.3E-01 |
| AT3G26320 | <i>CYP71B36</i>   | cytochrome P450, family 71, subfamily B, polypeptide 36                                      | 2.9 | 3.9E-04 | 2.2E-03 | 1.4  | 2.7E-01 | 5.3E-01 |
| AT1G78990 | <i>AT1G78990</i>  | HXXXD-type acyl-transferase family protein                                                   | 2.9 | 3.2E-03 | 1.3E-02 | 1.3  | 4.8E-01 | 7.2E-01 |
| AT2G32500 | <i>AT2G32500</i>  | Stress responsive alpha-beta barrel domain protein                                           | 2.9 | 1.2E-09 | 4.3E-08 | 1.5  | 6.6E-03 | 5.6E-02 |
| AT3G47580 | <i>AT3G47580</i>  | Leucine-rich repeat protein kinase family protein                                            | 2.9 | 5.3E-08 | 1.1E-06 | -1.1 | 6.7E-01 | 8.5E-01 |
| AT5G10250 | <i>DOT3</i>       | Phototropic-responsive NPH3 family protein                                                   | 2.9 | 2.2E-04 | 1.4E-03 | 1.6  | 8.7E-02 | 2.8E-01 |
| AT3G24170 | <i>GR1</i>        | glutathione-disulfide reductase                                                              | 2.9 | 7.1E-19 | 3.7E-16 | -1.1 | 3.5E-01 | 6.1E-01 |
| AT5G41460 | <i>AT5G41460</i>  | transferring glycosyl group transferase (DUF604)                                             | 2.9 | 3.6E-07 | 5.8E-06 | -1.5 | 4.5E-02 | 1.9E-01 |
| AT3G57920 | <i>SPL15</i>      | squamosa promoter binding protein-like 15                                                    | 2.9 | 1.8E-08 | 4.4E-07 | 1.4  | 5.2E-02 | 2.1E-01 |
| AT2G19650 | <i>AT2G19650</i>  | Cysteine/Histidine-rich C1 domain family protein                                             | 2.9 | 5.6E-11 | 3.0E-09 | -1.1 | 5.1E-01 | 7.4E-01 |
| AT2G47200 | <i>AT2G47200</i>  | hypothetical protein                                                                         | 2.9 | 6.1E-03 | 2.2E-02 | 1.4  | 4.1E-01 | 6.7E-01 |
| AT4G28740 | <i>AT4G28740</i>  | LOW PSII ACCUMULATION-like protein                                                           | 2.9 | 2.5E-13 | 2.7E-11 | 1.3  | 1.9E-02 | 1.1E-01 |
| AT2G48130 | <i>AT2G48130</i>  | Bifunctional inhibitor/lipid-transfer protein/seed storage 2S albumin superfamily protein    | 2.8 | 6.7E-07 | 1.0E-05 | -1.2 | 3.6E-01 | 6.2E-01 |
| AT3G46370 | <i>AT3G46370</i>  | Leucine-rich repeat protein kinase family protein                                            | 2.8 | 4.5E-03 | 1.7E-02 | 1.7  | 1.7E-01 | 4.1E-01 |
| AT2G04795 | <i>AT2G04795</i>  | hypothetical protein                                                                         | 2.8 | 2.4E-05 | 2.1E-04 | 1.2  | 3.4E-01 | 6.0E-01 |

|           |                  |                                                                          |     |         |         |      |         |         |
|-----------|------------------|--------------------------------------------------------------------------|-----|---------|---------|------|---------|---------|
| AT5G38420 | <i>RBCS2B</i>    | Ribulose bisphosphate carboxylase (small chain) family protein           | 2.8 | 3.2E-08 | 7.2E-07 | 1.1  | 7.3E-01 | 8.8E-01 |
| AT4G19170 | <i>NCED4</i>     | nine-cis-epoxycarotenoid dioxygenase 4                                   | 2.8 | 4.1E-05 | 3.4E-04 | -1.2 | 4.8E-01 | 7.2E-01 |
| AT1G21120 | <i>IGMT2</i>     | O-methyltransferase family protein                                       | 2.8 | 1.3E-05 | 1.2E-04 | -1.1 | 7.1E-01 | 8.7E-01 |
| AT1G55480 | <i>ZKT</i>       | protein containing PDZ domain, a K-box domain, and a TPR region          | 2.8 | 1.5E-10 | 7.3E-09 | 1.1  | 2.9E-01 | 5.6E-01 |
| AT3G05936 | <i>AT3G05936</i> | hypothetical protein                                                     | 2.8 | 1.7E-06 | 2.2E-05 | 1.4  | 7.3E-02 | 2.6E-01 |
| AT2G34460 | <i>AT2G34460</i> | NAD(P)-binding Rossmann-fold superfamily protein                         | 2.8 | 1.7E-12 | 1.5E-10 | 1.1  | 1.9E-01 | 4.4E-01 |
| AT2G16895 | <i>AT2G16895</i> | pseudogene of UDP-Glycosyltransferase superfamily protein                | 2.8 | 8.3E-03 | 2.8E-02 | 1.1  | 7.9E-01 | 9.1E-01 |
| AT5G63060 | <i>AT5G63060</i> | Sec14p-like phosphatidylinositol transfer family protein                 | 2.8 | 1.5E-06 | 1.9E-05 | 1.9  | 1.7E-03 | 2.2E-02 |
| AT1G14150 | <i>PnsL2</i>     | PsbQ-like 2                                                              | 2.8 | 2.2E-09 | 7.2E-08 | 1.1  | 3.9E-01 | 6.5E-01 |
| AT5G07020 | <i>AT5G07020</i> | proline-rich family protein                                              | 2.8 | 3.3E-12 | 2.5E-10 | 1.2  | 4.3E-02 | 1.8E-01 |
| AT1G79770 | <i>AT1G79770</i> | CASP-like protein (DUF1677)                                              | 2.8 | 6.1E-07 | 9.2E-06 | -1.1 | 6.4E-01 | 8.3E-01 |
| AT3G04140 | <i>AT3G04140</i> | Ankyrin repeat family protein                                            | 2.8 | 2.9E-12 | 2.3E-10 | -1.1 | 4.8E-01 | 7.2E-01 |
| AT2G38780 | <i>AT2G38780</i> | cytochrome C oxidase subunit                                             | 2.8 | 1.4E-13 | 1.6E-11 | 1.1  | 2.7E-01 | 5.4E-01 |
| AT5G62140 | <i>AT5G62140</i> | ATP-dependent Clp protease ATP-binding subunit                           | 2.8 | 1.2E-11 | 7.5E-10 | 1.1  | 3.0E-01 | 5.7E-01 |
| AT1G35290 | <i>AT1G35290</i> | Thioesterase superfamily protein                                         | 2.8 | 8.8E-05 | 6.4E-04 | -1.2 | 3.7E-01 | 6.3E-01 |
| AT5G26820 | <i>IREG3</i>     | iron-regulated protein 3                                                 | 2.8 | 3.1E-11 | 1.8E-09 | 1.4  | 4.4E-03 | 4.3E-02 |
| AT3G21510 | <i>AHP1</i>      | histidine-containing phosphotransmitter 1                                | 2.8 | 4.8E-07 | 7.5E-06 | 1.1  | 6.2E-01 | 8.2E-01 |
| AT5G56840 | <i>AT5G56840</i> | myb-like transcription factor family protein                             | 2.8 | 5.6E-03 | 2.0E-02 | -1.6 | 2.7E-01 | 5.3E-01 |
| AT2G31790 | <i>AT2G31790</i> | UDP-Glycosyltransferase superfamily protein                              | 2.8 | 4.4E-11 | 2.4E-09 | 1.1  | 5.7E-01 | 7.9E-01 |
| AT1G52870 | <i>AT1G52870</i> | Peroxisomal membrane 22 kDa (Mpv17/PMP22) family protein                 | 2.8 | 9.4E-10 | 3.5E-08 | 1.0  | 7.3E-01 | 8.8E-01 |
| AT1G62250 | <i>AT1G62250</i> | orotidine 5'-phosphate decarboxylase                                     | 2.8 | 1.5E-12 | 1.3E-10 | -1.0 | 6.3E-01 | 8.2E-01 |
| AT5G59130 | <i>AT5G59130</i> | Subtilase family protein                                                 | 2.8 | 1.2E-12 | 1.1E-10 | -1.2 | 5.4E-02 | 2.1E-01 |
| AT3G48420 | <i>AT3G48420</i> | Haloacid dehalogenase-like hydrolase (HAD) superfamily protein           | 2.8 | 5.3E-09 | 1.6E-07 | 1.3  | 4.0E-02 | 1.8E-01 |
| AT5G52420 | <i>AT5G52420</i> | transmembrane protein                                                    | 2.8 | 2.3E-13 | 2.6E-11 | 1.1  | 2.7E-01 | 5.3E-01 |
| AT3G46650 | <i>AT3G46650</i> | UDP-Glycosyltransferase superfamily protein                              | 2.8 | 3.6E-05 | 3.0E-04 | 1.9  | 7.5E-03 | 6.1E-02 |
| AT5G65840 | <i>AT5G65840</i> | Thioredoxin superfamily protein                                          | 2.8 | 5.4E-16 | 1.3E-13 | -1.1 | 3.2E-01 | 5.9E-01 |
| AT4G18210 | <i>PUP10</i>     | purine permease 10                                                       | 2.8 | 6.9E-08 | 1.4E-06 | 1.3  | 1.1E-01 | 3.3E-01 |
| AT1G62750 | <i>SCO1</i>      | Translation elongation factor EFG/EF2 protein                            | 2.8 | 2.0E-11 | 1.2E-09 | 1.2  | 5.1E-02 | 2.1E-01 |
| AT2G15080 | <i>RLP19</i>     | receptor like protein 19                                                 | 2.8 | 1.8E-04 | 1.2E-03 | 1.3  | 3.3E-01 | 5.9E-01 |
| AT1G68240 | <i>AT1G68240</i> | basic helix-loop-helix (bHLH) DNA-binding superfamily protein            | 2.8 | 1.3E-02 | 4.1E-02 | 2.4  | 3.9E-02 | 1.7E-01 |
| AT5G38510 | <i>AT5G38510</i> | Rhomboid-related intramembrane serine protease family protein            | 2.8 | 9.8E-11 | 4.9E-09 | 1.0  | 7.6E-01 | 9.0E-01 |
| AT3G28840 | <i>AT3G28840</i> | hypothetical protein (DUF1216)                                           | 2.8 | 1.1E-02 | 3.4E-02 | -3.3 | 3.2E-02 | 1.5E-01 |
| AT3G01500 | <i>CA1</i>       | carbonic anhydrase 1                                                     | 2.8 | 4.8E-08 | 1.0E-06 | 1.2  | 2.7E-01 | 5.3E-01 |
| AT3G19450 | <i>ATCAD4</i>    | GroES-like zinc-binding alcohol dehydrogenase family protein             | 2.8 | 5.8E-13 | 5.6E-11 | 1.1  | 4.0E-01 | 6.6E-01 |
| AT4G35090 | <i>CAT2</i>      | catalase 2                                                               | 2.8 | 2.0E-13 | 2.3E-11 | 1.0  | 8.3E-01 | 9.4E-01 |
| AT2G30490 | <i>C4H</i>       | cinnamate-4-hydroxylase                                                  | 2.8 | 8.4E-16 | 1.9E-13 | 1.0  | 5.2E-01 | 7.5E-01 |
| AT1G01250 | <i>AT1G01250</i> | Integrase-type DNA-binding superfamily protein                           | 2.8 | 4.2E-03 | 1.6E-02 | -1.0 | 1.0E+00 | 1.0E+00 |
| AT2G47270 | <i>UPB1</i>      | transcription factor UPBEAT protein                                      | 2.8 | 1.0E-07 | 1.9E-06 | 1.1  | 5.6E-01 | 7.8E-01 |
| AT5G08760 | <i>AT5G08760</i> | transmembrane protein                                                    | 2.8 | 4.1E-04 | 2.3E-03 | -1.2 | 6.0E-01 | 8.0E-01 |
| AT2G35960 | <i>NHL12</i>     | NDR1/HIN1-like 12                                                        | 2.8 | 1.1E-08 | 2.9E-07 | -1.5 | 1.2E-02 | 8.2E-02 |
| AT4G29930 | <i>AT4G29930</i> | basic helix-loop-helix (bHLH) DNA-binding superfamily protein            | 2.8 | 8.8E-05 | 6.3E-04 | 1.6  | 5.4E-02 | 2.1E-01 |
| AT4G34138 | <i>UGT73B1</i>   | UDP-glucosyl transferase 73B1                                            | 2.8 | 3.1E-12 | 2.4E-10 | -1.0 | 8.8E-01 | 9.6E-01 |
| AT1G70985 | <i>AT1G70985</i> | hydroxyproline-rich glycoprotein family protein                          | 2.7 | 2.7E-08 | 6.3E-07 | -1.9 | 3.9E-04 | 8.3E-03 |
| AT1G78140 | <i>AT1G78140</i> | S-adenosyl-L-methionine-dependent methyltransferases superfamily protein | 2.7 | 3.9E-17 | 1.3E-14 | 1.2  | 5.6E-03 | 5.0E-02 |
| AT4G34060 | <i>DML3</i>      | demeter-like protein 3                                                   | 2.7 | 2.8E-04 | 1.7E-03 | -1.2 | 5.8E-01 | 7.9E-01 |
| AT1G50250 | <i>FTSH1</i>     | FTSH protease 1                                                          | 2.7 | 4.6E-12 | 3.7E-10 | 1.2  | 2.7E-02 | 1.4E-01 |
| AT3G22210 | <i>AT3G22210</i> | transmembrane protein                                                    | 2.7 | 2.1E-07 | 3.7E-06 | 1.8  | 4.7E-04 | 9.5E-03 |
| AT1G02220 | <i>NAC003</i>    | NAC domain containing protein 3                                          | 2.7 | 3.7E-08 | 8.2E-07 | -1.1 | 5.2E-01 | 7.5E-01 |
| AT3G23400 | <i>FIB4</i>      | Plastid-lipid associated protein PAP / fibrillin family protein          | 2.7 | 2.3E-15 | 4.4E-13 | 1.2  | 6.3E-02 | 2.3E-01 |
| AT3G14770 | <i>SWEET2</i>    | Nodulin MtN3 family protein                                              | 2.7 | 1.5E-05 | 1.4E-04 | 1.4  | 1.3E-01 | 3.6E-01 |
| AT2G31750 | <i>UGT74D1</i>   | UDP-glucosyl transferase 74D1                                            | 2.7 | 1.3E-19 | 8.1E-17 | -1.1 | 2.0E-01 | 4.6E-01 |
| AT4G38970 | <i>FBA2</i>      | fructose-bisphosphate aldolase 2                                         | 2.7 | 5.3E-10 | 2.1E-08 | 1.3  | 4.1E-02 | 1.8E-01 |
| AT2G29310 | <i>AT2G29310</i> | NAD(P)-binding Rossmann-fold superfamily protein                         | 2.7 | 9.8E-09 | 2.6E-07 | -1.2 | 1.7E-01 | 4.2E-01 |
| AT3G46670 | <i>UGT76E11</i>  | UDP-glucosyl transferase 76E11                                           | 2.7 | 9.4E-07 | 1.3E-05 | 1.7  | 2.8E-03 | 3.2E-02 |
| AT2G23840 | <i>AT2G23840</i> | HNH endonuclease                                                         | 2.7 | 2.3E-07 | 3.9E-06 | 1.2  | 3.0E-01 | 5.6E-01 |
| AT1G72930 | <i>TIR</i>       | toll/interleukin-1 receptor-like protein                                 | 2.7 | 1.5E-04 | 1.0E-03 | 1.4  | 2.2E-01 | 4.7E-01 |
| AT4G15720 | <i>AT4G15720</i> | Tetratricopeptide repeat (TPR)-like superfamily protein                  | 2.7 | 5.3E-03 | 2.0E-02 | 1.8  | 9.7E-02 | 3.0E-01 |
| AT2G37240 | <i>AT2G37240</i> | Thioredoxin superfamily protein                                          | 2.7 | 7.5E-10 | 2.8E-08 | 1.0  | 9.3E-01 | 9.8E-01 |
| AT5G17170 | <i>ENH1</i>      | rubredoxin family protein                                                | 2.7 | 1.2E-11 | 7.7E-10 | -1.0 | 7.4E-01 | 8.8E-01 |
| AT3G27110 | <i>AT3G27110</i> | Peptidase family M48 family protein                                      | 2.7 | 4.2E-16 | 1.0E-13 | -1.1 | 3.8E-01 | 6.4E-01 |
| AT2G04790 | <i>AT2G04790</i> | PTB domain engulfment adapter                                            | 2.7 | 5.4E-09 | 1.6E-07 | 1.4  | 2.6E-02 | 1.4E-01 |
| AT3G03630 | <i>CS26</i>      | cysteine synthase 26                                                     | 2.7 | 5.9E-09 | 1.7E-07 | 1.8  | 5.2E-05 | 2.1E-03 |
| AT3G22420 | <i>WNK2</i>      | with no lysine (K) kinase 2                                              | 2.7 | 5.4E-11 | 2.9E-09 | 1.3  | 1.5E-02 | 9.6E-02 |
| AT5G66760 | <i>SDH1-1</i>    | succinate dehydrogenase 1-1                                              | 2.7 | 2.0E-18 | 8.2E-16 | 1.0  | 4.8E-01 | 7.2E-01 |
| AT3G01970 | <i>WRKY45</i>    | WRKY DNA-binding protein 45                                              | 2.7 | 3.6E-07 | 5.8E-06 | 1.3  | 1.4E-01 | 3.8E-01 |
| AT5G38410 | <i>RBCS3B</i>    | Ribulose bisphosphate carboxylase (small chain) family protein           | 2.7 | 1.9E-08 | 4.5E-07 | 1.4  | 2.8E-02 | 1.4E-01 |
| AT4G23493 | <i>AT4G23493</i> | hypothetical protein                                                     | 2.7 | 3.3E-06 | 3.9E-05 | 1.1  | 5.5E-01 | 7.7E-01 |
| AT1G34000 | <i>OHP2</i>      | one-helix protein 2                                                      | 2.7 | 2.9E-12 | 2.3E-10 | 1.2  | 1.0E-01 | 3.1E-01 |
| AT1G78476 | <i>AT1G78476</i> | hypothetical protein                                                     | 2.7 | 1.4E-03 | 6.4E-03 | 1.1  | 8.6E-01 | 9.5E-01 |



|           |           |                                                                                |     |         |         |      |         |         |
|-----------|-----------|--------------------------------------------------------------------------------|-----|---------|---------|------|---------|---------|
| AT2G28105 | AT2G28105 | replication factor-A carboxy-terminal domain                                   | 2.7 | 3.5E-06 | 4.1E-05 | 1.6  | 1.5E-02 | 9.7E-02 |
| AT5G44575 | AT5G44575 | hypothetical protein                                                           | 2.7 | 5.5E-03 | 2.0E-02 | 1.6  | 1.8E-01 | 4.3E-01 |
| AT1G08550 | NPQ1      | non-photochemical quenching 1                                                  | 2.7 | 1.2E-11 | 7.8E-10 | 1.5  | 1.0E-04 | 3.2E-03 |
| AT1G15980 | PnsB1     | NDH-dependent cyclic electron flow 1                                           | 2.7 | 7.9E-09 | 2.2E-07 | 1.1  | 4.8E-01 | 7.2E-01 |
| AT1G23740 | AOR       | Oxidoreductase, zinc-binding dehydrogenase family protein                      | 2.7 | 1.1E-10 | 5.2E-09 | 1.1  | 5.4E-01 | 7.6E-01 |
| AT1G76080 | CDSP32    | chloroplastic drought-induced stress protein of 32                             | 2.7 | 5.9E-12 | 4.1E-10 | 1.5  | 1.3E-04 | 3.9E-03 |
| AT2G41120 | AT2G41120 | DUF309 domain protein                                                          | 2.7 | 8.7E-07 | 1.3E-05 | 1.1  | 7.7E-01 | 9.0E-01 |
| AT4G15563 | AT4G15563 | F-box-like protein                                                             | 2.7 | 8.5E-08 | 1.7E-06 | 1.0  | 9.0E-01 | 9.6E-01 |
| AT5G19855 | RbcX2     | Chaperonin-like RbcX protein                                                   | 2.7 | 4.1E-12 | 3.0E-10 | 1.2  | 3.2E-02 | 1.5E-01 |
| AT1G47610 | AT1G47610 | Transducin/WD40 repeat-like superfamily protein                                | 2.7 | 1.0E-02 | 3.4E-02 | 1.1  | 8.6E-01 | 9.5E-01 |
| AT1G74430 | MYB95     | myb domain protein 95                                                          | 2.7 | 5.7E-15 | 9.7E-13 | -1.3 | 1.8E-02 | 1.1E-01 |
| AT1G76800 | AT1G76800 | Vacuolar iron transporter (VIT) family protein                                 | 2.7 | 5.8E-04 | 3.1E-03 | 1.3  | 3.0E-01 | 5.7E-01 |
| AT2G32510 | MAPKKK17  | mitogen-activated protein kinase kinase kinase 17                              | 2.7 | 1.8E-09 | 6.2E-08 | -1.4 | 1.2E-02 | 8.0E-02 |
| AT3G16175 | AT3G16175 | Thioesterase superfamily protein                                               | 2.7 | 6.9E-07 | 1.0E-05 | 1.3  | 8.9E-02 | 2.9E-01 |
| AT3G47770 | ABCA6     | ABC2 homolog 5                                                                 | 2.7 | 9.7E-03 | 3.2E-02 | 1.1  | 8.6E-01 | 9.5E-01 |
| AT1G71810 | AT1G71810 | Protein kinase superfamily protein                                             | 2.7 | 4.4E-11 | 2.4E-09 | -1.0 | 6.6E-01 | 8.4E-01 |
| AT5G08740 | NDC1      | NAD(P)H dehydrogenase C1                                                       | 2.7 | 4.7E-14 | 6.0E-12 | 1.2  | 2.2E-02 | 1.2E-01 |
| AT4G16690 | MES16     | methyl esterase 16                                                             | 2.7 | 2.1E-07 | 3.7E-06 | -1.1 | 6.4E-01 | 8.3E-01 |
| AT5G64120 | AT5G64120 | Peroxidase superfamily protein                                                 | 2.7 | 1.5E-06 | 2.0E-05 | -1.4 | 5.9E-02 | 2.2E-01 |
| AT1G13930 | AT1G13930 | oleosin-B3-like protein                                                        | 2.7 | 3.9E-10 | 1.6E-08 | 1.0  | 7.4E-01 | 8.8E-01 |
| AT3G20200 | AT3G20200 | kinase with adenine nucleotide alpha hydrolases-like domain-containing protein | 2.7 | 3.3E-08 | 7.4E-07 | -1.1 | 5.2E-01 | 7.5E-01 |
| AT5G41170 | AT5G41170 | Pentatricopeptide repeat (PPR-like) superfamily protein                        | 2.7 | 1.1E-06 | 1.5E-05 | 1.1  | 6.9E-01 | 8.6E-01 |
| AT4G37610 | BT5       | BTB and TAZ domain protein 5                                                   | 2.7 | 5.1E-10 | 2.1E-08 | -1.3 | 1.5E-02 | 9.7E-02 |
| AT3G21890 | BBX31     | B-box type zinc finger family protein                                          | 2.6 | 2.2E-06 | 2.8E-05 | -1.2 | 2.3E-01 | 4.9E-01 |
| AT5G35110 | AT5G35110 | hypothetical protein                                                           | 2.6 | 7.5E-04 | 3.8E-03 | 1.4  | 2.1E-01 | 4.6E-01 |
| AT3G55800 | SBPASE    | sedoheptulose-bisphosphatase                                                   | 2.6 | 5.0E-10 | 2.0E-08 | 1.1  | 2.4E-01 | 5.1E-01 |
| AT5G09230 | SRT2      | sirtuin 2                                                                      | 2.6 | 6.7E-15 | 1.1E-12 | 1.0  | 5.7E-01 | 7.9E-01 |
| AT1G74640 | AT1G74640 | alpha/beta-Hydrolases superfamily protein                                      | 2.6 | 1.3E-15 | 2.7E-13 | 1.1  | 1.7E-01 | 4.1E-01 |
| AT1G69730 | AT1G69730 | Wall-associated kinase family protein                                          | 2.6 | 8.1E-07 | 1.2E-05 | -1.2 | 2.5E-01 | 5.2E-01 |
| AT5G43260 | AT5G43260 | chaperone protein dnaJ-like protein                                            | 2.6 | 6.2E-13 | 5.9E-11 | -1.0 | 1.0E+00 | 1.0E+00 |
| AT4G37560 | AT4G37560 | Acetamidase/Formamidase family protein                                         | 2.6 | 7.7E-07 | 1.1E-05 | 1.6  | 8.1E-03 | 6.4E-02 |
| AT1G55020 | LOX1      | lipxygenase 1                                                                  | 2.6 | 2.6E-08 | 6.0E-07 | 1.0  | 7.9E-01 | 9.1E-01 |
| AT5G02180 | AT5G02180 | Transmembrane amino acid transporter family protein                            | 2.6 | 2.0E-08 | 4.8E-07 | 1.5  | 6.6E-03 | 5.6E-02 |
| AT3G05790 | LON4      | lon protease 4                                                                 | 2.6 | 9.1E-03 | 3.0E-02 | 1.4  | 4.0E-01 | 6.6E-01 |
| AT5G58760 | DDB2      | damaged DNA binding 2                                                          | 2.6 | 1.3E-14 | 1.9E-12 | 1.0  | 8.3E-01 | 9.3E-01 |
| AT4G25290 | AT4G25290 | DNA photolyase                                                                 | 2.6 | 1.8E-09 | 6.2E-08 | 1.3  | 5.5E-02 | 2.1E-01 |
| AT5G02120 | OHP       | one helix protein                                                              | 2.6 | 5.3E-11 | 2.9E-09 | 1.1  | 2.8E-01 | 5.5E-01 |
| AT2G01110 | APG2      | Sec-independent periplasmic protein translocase                                | 2.6 | 3.8E-13 | 3.8E-11 | 1.2  | 6.6E-02 | 2.4E-01 |
| AT2G35130 | AT2G35130 | Tetratricopeptide repeat (TPR)-like superfamily protein                        | 2.6 | 2.9E-09 | 9.3E-08 | 1.3  | 2.9E-02 | 1.4E-01 |
| AT1G23200 | AT1G23200 | Plant invertase/pectin methylesterase inhibitor superfamily                    | 2.6 | 4.2E-04 | 2.3E-03 | -1.2 | 4.9E-01 | 7.2E-01 |
| AT2G30950 | VAR2      | FtsH extracellular protease family                                             | 2.6 | 2.7E-11 | 1.6E-09 | 1.3  | 2.2E-02 | 1.2E-01 |
| AT4G17215 | AT4G17215 | Pollen Ole e 1 allergen and extensin family protein                            | 2.6 | 3.2E-06 | 3.9E-05 | -1.0 | 9.0E-01 | 9.7E-01 |
| AT4G09350 | NdhT      | Chaperone DnaJ-domain superfamily protein                                      | 2.6 | 4.0E-08 | 8.6E-07 | 1.2  | 1.4E-01 | 3.7E-01 |
| AT4G37150 | MES9      | methyl esterase 9                                                              | 2.6 | 2.6E-11 | 1.5E-09 | -1.1 | 2.5E-01 | 5.1E-01 |
| AT2G34810 | AT2G34810 | FAD-binding Berberine family protein                                           | 2.6 | 7.7E-07 | 1.1E-05 | -1.8 | 1.4E-03 | 2.0E-02 |
| AT3G10840 | AT3G10840 | alpha/beta-Hydrolases superfamily protein                                      | 2.6 | 1.3E-08 | 3.2E-07 | 1.2  | 2.8E-01 | 5.5E-01 |
| AT1G22750 | AT1G22750 | transmembrane protein                                                          | 2.6 | 1.2E-08 | 3.1E-07 | 1.2  | 1.2E-01 | 3.4E-01 |
| AT1G65240 | AT1G65240 | Eukaryotic aspartyl protease family protein                                    | 2.6 | 6.6E-03 | 2.3E-02 | 1.7  | 1.5E-01 | 3.8E-01 |
| AT1G07250 | UGT71C4   | UDP-glucosyl transferase 71C4                                                  | 2.6 | 8.4E-16 | 1.9E-13 | 1.1  | 9.0E-02 | 2.9E-01 |
| AT3G48480 | AT3G48480 | Cysteine proteinases superfamily protein                                       | 2.6 | 8.9E-07 | 1.3E-05 | -1.5 | 6.6E-02 | 2.4E-01 |
| AT1G53090 | SPA4      | SPA1-related 4                                                                 | 2.6 | 2.3E-13 | 2.6E-11 | -1.1 | 1.6E-01 | 4.0E-01 |
| AT2G21560 | AT2G21560 | nucleolar-like protein                                                         | 2.6 | 3.8E-11 | 2.2E-09 | -1.0 | 6.6E-01 | 8.4E-01 |
| AT1G07128 | AT1G07128 | Natural antisense transcript overlaps with AT1G07130                           | 2.6 | 1.6E-07 | 2.9E-06 | 1.1  | 5.2E-01 | 7.5E-01 |
| AT2G22240 | MIPS2     | myo-inositol-1-phosphate synthase 2                                            | 2.6 | 2.0E-10 | 8.9E-09 | -1.2 | 8.7E-02 | 2.8E-01 |
| AT5G04830 | AT5G04830 | Nuclear transport factor 2 (NTF2) family protein                               | 2.6 | 2.4E-15 | 4.6E-13 | -1.0 | 7.3E-01 | 8.8E-01 |
| AT3G46870 | AT3G46870 | Pentatricopeptide repeat (PPR) superfamily protein                             | 2.5 | 2.4E-08 | 5.6E-07 | 1.2  | 2.6E-01 | 5.2E-01 |
| AT1G29530 | AT1G29530 | hypothetical protein                                                           | 2.5 | 6.1E-10 | 2.4E-08 | 1.4  | 4.3E-03 | 4.2E-02 |
| AT1G66230 | MYB20     | myb domain protein 20                                                          | 2.5 | 2.3E-07 | 4.0E-06 | 1.4  | 2.8E-02 | 1.4E-01 |
| AT5G11590 | TINY2     | Integrase-type DNA-binding superfamily protein                                 | 2.5 | 7.4E-05 | 5.5E-04 | 1.1  | 8.1E-01 | 9.3E-01 |
| AT4G01080 | TBL26     | TRICHOME BIREFRINGENCE-LIKE 26                                                 | 2.5 | 1.1E-04 | 7.7E-04 | -1.3 | 2.2E-01 | 4.8E-01 |
| AT2G23010 | SCPL9     | serine carboxypeptidase-like 9                                                 | 2.5 | 1.4E-06 | 1.9E-05 | -1.6 | 9.0E-03 | 6.9E-02 |
| AT1G80300 | NTT1      | nucleotide transporter 1                                                       | 2.5 | 2.9E-14 | 3.9E-12 | -1.0 | 7.2E-01 | 8.8E-01 |
| AT2G34960 | CAT5      | cationic amino acid transporter 5                                              | 2.5 | 6.0E-05 | 4.6E-04 | 1.1  | 7.3E-01 | 8.8E-01 |
| AT3G61870 | AT3G61870 | plant/protein                                                                  | 2.5 | 5.7E-11 | 3.1E-09 | 1.2  | 1.5E-01 | 3.9E-01 |
| AT3G04210 | AT3G04210 | Disease resistance protein (TIR-NBS class)                                     | 2.5 | 6.6E-04 | 3.5E-03 | -1.6 | 1.0E-01 | 3.1E-01 |
| AT4G11570 | AT4G11570 | Haloacid dehalogenase-like hydrolase (HAD) superfamily protein                 | 2.5 | 5.4E-12 | 3.8E-10 | 1.1  | 5.5E-01 | 7.7E-01 |
| AT3G50980 | XERO1     | dehydrin xero 1                                                                | 2.5 | 3.2E-04 | 1.9E-03 | 1.7  | 3.5E-02 | 1.6E-01 |
| AT1G72610 | GER1      | germin-like protein 1                                                          | 2.5 | 3.7E-07 | 6.0E-06 | 1.2  | 1.8E-01 | 4.3E-01 |
| AT2G33855 | AT2G33855 | transmembrane protein                                                          | 2.5 | 4.6E-10 | 1.9E-08 | -1.1 | 4.3E-01 | 6.9E-01 |
| AT1G51110 | AT1G51110 | Plastid-lipid associated protein PAP / fibrillin family protein                | 2.5 | 1.7E-06 | 2.2E-05 | 1.6  | 4.2E-03 | 4.2E-02 |
| AT1G74290 | AT1G74290 | alpha/beta-Hydrolases superfamily protein                                      | 2.5 | 2.0E-03 | 8.7E-03 | -1.2 | 5.7E-01 | 7.8E-01 |
| AT3G27380 | SDH2-1    | succinate dehydrogenase 2-1                                                    | 2.5 | 6.0E-14 | 7.4E-12 | -1.1 | 2.3E-01 | 4.9E-01 |
| AT2G46420 | AT2G46420 | helicase with zinc finger protein                                              | 2.5 | 4.1E-12 | 3.0E-10 | -1.0 | 7.4E-01 | 8.9E-01 |
| AT1G33110 | AT1G33110 | MATE efflux family protein                                                     | 2.5 | 5.1E-08 | 1.1E-06 | 1.1  | 4.4E-01 | 6.9E-01 |

|           |                  |                                                                                              |     |         |         |      |         |         |
|-----------|------------------|----------------------------------------------------------------------------------------------|-----|---------|---------|------|---------|---------|
| AT5G38430 | <i>RBCS1B</i>    | Ribulose bisphosphate carboxylase (small chain) family protein                               | 2.5 | 3.0E-07 | 5.0E-06 | 1.4  | 3.0E-02 | 1.5E-01 |
| AT3G15090 | <i>AT3G15090</i> | GroES-like zinc-binding alcohol dehydrogenase family protein                                 | 2.5 | 1.3E-18 | 6.1E-16 | -1.1 | 6.9E-02 | 2.5E-01 |
| AT3G06145 | <i>AT3G06145</i> | RING zinc finger protein                                                                     | 2.5 | 4.4E-07 | 6.9E-06 | -1.1 | 4.7E-01 | 7.1E-01 |
| AT1G65230 | <i>AT1G65230</i> | transmembrane protein, putative (DUF2358)                                                    | 2.5 | 3.3E-09 | 1.0E-07 | 1.4  | 1.0E-02 | 7.4E-02 |
| AT4G26200 | <i>ACS7</i>      | 1-amino-cyclopropane-1-carboxylate synthase 7                                                | 2.5 | 2.4E-04 | 1.5E-03 | -1.0 | 8.5E-01 | 9.4E-01 |
| AT2G37770 | <i>ChIAKR</i>    | NAD(P)-linked oxidoreductase superfamily protein                                             | 2.5 | 5.4E-03 | 2.0E-02 | -1.9 | 1.2E-01 | 3.4E-01 |
| AT4G38620 | <i>MYB4</i>      | myb domain protein 4                                                                         | 2.5 | 7.4E-08 | 1.5E-06 | -1.5 | 5.0E-03 | 4.7E-02 |
| AT1G65130 | <i>AT1G65130</i> | Ubiquitin carboxyl-terminal hydrolase-related protein                                        | 2.5 | 3.0E-03 | 1.2E-02 | -1.1 | 9.0E-01 | 9.6E-01 |
| AT5G11160 | <i>APT5</i>      | adenine phosphoribosyltransferase 5                                                          | 2.5 | 4.0E-06 | 4.6E-05 | 1.6  | 5.7E-03 | 5.1E-02 |
| AT3G61880 | <i>CYP78A9</i>   | cytochrome p450 78a9                                                                         | 2.5 | 7.3E-04 | 3.8E-03 | -2.0 | 2.9E-02 | 1.4E-01 |
| AT1G32440 | <i>PKp3</i>      | plastidial pyruvate kinase 3                                                                 | 2.5 | 9.4E-16 | 2.1E-13 | -1.0 | 4.8E-01 | 7.2E-01 |
| AT4G21760 | <i>BGLU47</i>    | beta-glucosidase 47                                                                          | 2.5 | 1.2E-02 | 3.6E-02 | 1.4  | 4.0E-01 | 6.5E-01 |
| AT5G45680 | <i>FKBP13</i>    | FK506-binding protein 13                                                                     | 2.5 | 5.5E-09 | 1.6E-07 | 1.4  | 3.6E-03 | 3.7E-02 |
| AT2G48090 | <i>AT2G48090</i> | hypothetical protein                                                                         | 2.5 | 9.3E-04 | 4.6E-03 | 1.0  | 9.9E-01 | 1.0E+00 |
| AT4G28290 | <i>AT4G28290</i> | hypothetical protein                                                                         | 2.5 | 3.8E-11 | 2.1E-09 | -1.2 | 1.4E-01 | 3.8E-01 |
| AT1G10960 | <i>FD1</i>       | ferredoxin 1                                                                                 | 2.5 | 7.9E-09 | 2.2E-07 | 1.3  | 5.2E-02 | 2.1E-01 |
| AT3G57830 | <i>AT3G57830</i> | Leucine-rich repeat protein kinase family protein                                            | 2.5 | 1.1E-09 | 4.1E-08 | 1.1  | 6.4E-01 | 8.3E-01 |
| AT5G64850 | <i>AT5G64850</i> | sorbin/SH3 domain protein                                                                    | 2.5 | 2.2E-11 | 1.3E-09 | 1.0  | 6.7E-01 | 8.4E-01 |
| AT1G32080 | <i>LrgB</i>      | membrane protein                                                                             | 2.5 | 1.0E-07 | 1.9E-06 | -1.3 | 9.3E-02 | 2.9E-01 |
| AT2G04530 | <i>CPZ</i>       | Metallo-hydrolase/oxidoreductase superfamily protein                                         | 2.5 | 1.5E-07 | 2.8E-06 | 1.5  | 7.1E-03 | 5.9E-02 |
| AT3G10986 | <i>AT3G10986</i> | LURP-one-like protein (DUF567)                                                               | 2.5 | 1.7E-04 | 1.1E-03 | 1.2  | 3.4E-01 | 6.1E-01 |
| AT2G40390 | <i>AT2G40390</i> | neuronal PAS domain protein                                                                  | 2.5 | 2.8E-03 | 1.2E-02 | 1.5  | 1.7E-01 | 4.2E-01 |
| AT4G17970 | <i>ALMT12</i>    | aluminum-activated, malate transporter 12                                                    | 2.5 | 3.1E-05 | 2.6E-04 | -1.2 | 4.4E-01 | 6.9E-01 |
| AT4G27410 | <i>RD26</i>      | NAC (No Apical Meristem) domain transcriptional regulator superfamily protein                | 2.5 | 1.0E-08 | 2.7E-07 | 1.2  | 9.5E-02 | 3.0E-01 |
| AT3G44990 | <i>XTH31</i>     | xyloglucan endo-transglycosylase-related 8                                                   | 2.5 | 2.6E-10 | 1.2E-08 | -1.2 | 6.5E-02 | 2.4E-01 |
| AT5G18470 | <i>AT5G18470</i> | Curculin-like (mannose-binding) lectin family                                                | 2.4 | 2.1E-05 | 1.9E-04 | -1.2 | 2.8E-01 | 5.5E-01 |
| AT1G51090 | <i>AT1G51090</i> | Heavy metal transport/detoxification superfamily protein                                     | 2.4 | 2.5E-03 | 1.0E-02 | -1.5 | 2.4E-01 | 5.0E-01 |
| AT3G03440 | <i>AT3G03440</i> | ARM repeat superfamily protein                                                               | 2.4 | 4.3E-11 | 2.4E-09 | -1.1 | 3.2E-01 | 5.9E-01 |
| AT5G40500 | <i>AT5G40500</i> | hypothetical protein                                                                         | 2.4 | 1.8E-08 | 4.4E-07 | 1.3  | 2.2E-02 | 1.2E-01 |
| AT5G08650 | <i>AT5G08650</i> | Small GTP-binding protein                                                                    | 2.4 | 1.9E-09 | 6.3E-08 | 1.3  | 4.8E-02 | 2.0E-01 |
| AT1G48320 | <i>DHNAT1</i>    | Thioesterase superfamily protein                                                             | 2.4 | 3.9E-10 | 1.6E-08 | -1.0 | 9.5E-01 | 9.9E-01 |
| AT4G28025 | <i>AT4G28025</i> | hypothetical protein                                                                         | 2.4 | 3.4E-13 | 3.6E-11 | 1.0  | 5.5E-01 | 7.7E-01 |
| AT3G19480 | <i>AT3G19480</i> | D-3-phosphoglycerate dehydrogenase                                                           | 2.4 | 7.6E-09 | 2.1E-07 | 1.5  | 1.7E-03 | 2.3E-02 |
| AT5G13650 | <i>SVR3</i>      | elongation factor family protein                                                             | 2.4 | 1.8E-10 | 8.5E-09 | 1.2  | 7.7E-02 | 2.6E-01 |
| AT3G22060 | <i>AT3G22060</i> | Receptor-like protein kinase-related family protein                                          | 2.4 | 2.9E-06 | 3.5E-05 | 1.0  | 9.6E-01 | 9.9E-01 |
| AT4G04330 | <i>RbcX1</i>     | Chaperonin-like RbcX protein                                                                 | 2.4 | 4.3E-06 | 4.9E-05 | 1.6  | 9.5E-03 | 7.1E-02 |
| AT1G48650 | <i>AT1G48650</i> | DEA(D/H)-box RNA helicase family protein                                                     | 2.4 | 3.2E-14 | 4.2E-12 | 1.2  | 4.9E-03 | 4.6E-02 |
| AT3G21400 | <i>AT3G21400</i> | dynein beta chain, ciliary protein                                                           | 2.4 | 1.5E-10 | 7.1E-09 | 1.1  | 2.1E-01 | 4.6E-01 |
| AT1G08570 | <i>ACHT4</i>     | atypical CYS HIS rich thioredoxin 4                                                          | 2.4 | 6.4E-17 | 2.0E-14 | -1.2 | 3.0E-03 | 3.3E-02 |
| AT1G07010 | <i>SLP1</i>      | Calcineurin-like metallo-phosphoesterase superfamily protein                                 | 2.4 | 7.3E-10 | 2.8E-08 | 1.1  | 3.3E-01 | 5.9E-01 |
| AT1G32900 | <i>GBSS1</i>     | UDP-Glycosyltransferase superfamily protein                                                  | 2.4 | 1.1E-06 | 1.5E-05 | 1.1  | 6.0E-01 | 8.0E-01 |
| AT3G10060 | <i>AT3G10060</i> | FKBP-like peptidyl-prolyl cis-trans isomerase family protein                                 | 2.4 | 1.9E-09 | 6.4E-08 | 1.5  | 5.7E-04 | 1.1E-02 |
| AT5G48300 | <i>ADG1</i>      | ADP glucose pyrophosphorylase 1                                                              | 2.4 | 8.4E-09 | 2.3E-07 | -1.0 | 8.4E-01 | 9.4E-01 |
| AT4G39980 | <i>DHS1</i>      | 3-deoxy-D-arabino-heptulosonate 7-phosphate synthase 1                                       | 2.4 | 2.4E-13 | 2.6E-11 | 1.2  | 5.3E-02 | 2.1E-01 |
| AT3G05360 | <i>RLP30</i>     | receptor like protein 30                                                                     | 2.4 | 8.3E-08 | 1.6E-06 | 1.1  | 5.1E-01 | 7.4E-01 |
| AT1G49380 | <i>AT1G49380</i> | cytochrome c biogenesis protein family                                                       | 2.4 | 1.6E-09 | 5.6E-08 | 1.4  | 3.2E-03 | 3.5E-02 |
| AT1G18660 | <i>AT1G18660</i> | zinc finger (C3HC4-type RING finger) family protein                                          | 2.4 | 1.7E-15 | 3.3E-13 | -1.0 | 7.7E-01 | 9.0E-01 |
| AT2G13570 | <i>NF-YB7</i>    | nuclear factor Y, subunit B7                                                                 | 2.4 | 6.7E-03 | 2.3E-02 | -1.7 | 1.4E-01 | 3.8E-01 |
| AT5G05200 | <i>AT5G05200</i> | Protein kinase superfamily protein                                                           | 2.4 | 1.6E-12 | 1.4E-10 | 1.0  | 7.3E-01 | 8.8E-01 |
| AT1G44000 | <i>AT1G44000</i> | STAY-GREEN-like protein                                                                      | 2.4 | 1.8E-07 | 3.2E-06 | 1.5  | 4.7E-03 | 4.5E-02 |
| AT2G03310 | <i>AT2G03310</i> | transmembrane protein                                                                        | 2.4 | 2.1E-06 | 2.6E-05 | 1.5  | 2.3E-02 | 1.2E-01 |
| AT1G16080 | <i>AT1G16080</i> | nuclear protein                                                                              | 2.4 | 2.5E-10 | 1.1E-08 | 1.1  | 2.0E-01 | 4.6E-01 |
| AT3G52540 | <i>OFFP18</i>    | ovate family protein 18                                                                      | 2.4 | 3.9E-06 | 4.5E-05 | 1.1  | 4.5E-01 | 7.0E-01 |
| AT2G35390 | <i>AT2G35390</i> | Phosphoribosyltransferase family protein                                                     | 2.4 | 5.4E-10 | 2.2E-08 | 1.0  | 9.7E-01 | 9.9E-01 |
| AT4G24700 | <i>AT4G24700</i> | hypothetical protein                                                                         | 2.4 | 2.3E-09 | 7.5E-08 | 1.2  | 1.8E-01 | 4.2E-01 |
| AT4G26790 | <i>AT4G26790</i> | GDSL-like Lipase/Acylhydrolase superfamily protein                                           | 2.4 | 7.4E-05 | 5.5E-04 | -1.5 | 8.3E-02 | 2.8E-01 |
| AT1G77090 | <i>AT1G77090</i> | thylakoid lumenal protein (Mog1/PsbP/DUF1795-like photosystem II reaction center PsbP family | 2.4 | 5.1E-11 | 2.8E-09 | 1.2  | 3.3E-02 | 1.6E-01 |
| AT4G35783 | <i>RTFL6</i>     | ROTUNDIFOLIA like 6                                                                          | 2.4 | 1.1E-04 | 7.7E-04 | -1.4 | 1.5E-01 | 3.8E-01 |
| AT4G00370 | <i>ANTR2</i>     | Major facilitator superfamily protein                                                        | 2.4 | 2.1E-12 | 1.7E-10 | -1.0 | 6.0E-01 | 8.1E-01 |
| AT2G04039 | <i>AT2G04039</i> | DUF2996 family protein                                                                       | 2.4 | 2.4E-08 | 5.6E-07 | 1.3  | 4.8E-02 | 2.0E-01 |
| AT4G10040 | <i>CYTC-2</i>    | cytochrome c-2                                                                               | 2.4 | 4.3E-15 | 7.4E-13 | -1.1 | 1.4E-01 | 3.8E-01 |
| AT2G36290 | <i>AT2G36290</i> | alpha/beta-Hydrolases superfamily protein                                                    | 2.4 | 5.7E-13 | 5.6E-11 | 1.0  | 8.8E-01 | 9.6E-01 |
| AT2G36895 | <i>AT2G36895</i> | D-tagatose-1,6-bisphosphate aldolase subunit                                                 | 2.4 | 7.6E-10 | 2.8E-08 | 1.2  | 1.7E-01 | 4.2E-01 |
| AT3G62090 | <i>PIL2</i>      | phytochrome interacting factor 3-like 2                                                      | 2.4 | 2.6E-06 | 3.2E-05 | -1.0 | 8.9E-01 | 9.6E-01 |
| AT4G34190 | <i>SEP1</i>      | stress enhanced protein 1                                                                    | 2.4 | 7.0E-10 | 2.7E-08 | 1.2  | 7.3E-02 | 2.5E-01 |
| AT4G39730 | <i>PLAT1</i>     | Lipase/lipoxygenase, PLAT/LH2 family protein                                                 | 2.4 | 2.4E-09 | 7.8E-08 | -1.4 | 3.2E-03 | 3.5E-02 |
| AT1G45474 | <i>Lhca5</i>     | photosystem I light harvesting complex protein 5                                             | 2.4 | 6.9E-10 | 2.6E-08 | 1.2  | 1.1E-01 | 3.2E-01 |
| AT2G04030 | <i>CR88</i>      | Chaperone protein htpG family protein                                                        | 2.4 | 5.9E-10 | 2.3E-08 | 1.3  | 6.9E-03 | 5.7E-02 |
| AT5G01260 | <i>AT5G01260</i> | Carbohydrate-binding-like fold                                                               | 2.4 | 1.5E-09 | 5.2E-08 | 1.1  | 4.5E-01 | 7.0E-01 |
| AT4G19560 | <i>CYCT1</i>     |                                                                                              | 2.4 | 8.5E-04 | 4.3E-03 | 1.7  | 3.1E-02 | 1.5E-01 |
| AT1G69200 | <i>FLN2</i>      | fructokinase-like protein                                                                    | 2.4 | 2.2E-07 | 3.9E-06 | 1.4  | 1.4E-02 | 9.0E-02 |
| AT2G19150 | <i>AT2G19150</i> | Pectin lyase-like superfamily protein                                                        | 2.4 | 6.1E-03 | 2.2E-02 | 1.2  | 5.6E-01 | 7.8E-01 |
| AT3G21390 | <i>AT3G21390</i> | Mitochondrial substrate carrier family protein                                               | 2.4 | 2.2E-11 | 1.3E-09 | 1.1  | 3.6E-01 | 6.3E-01 |

|           |                  |                                                                                   |     |         |         |      |         |         |
|-----------|------------------|-----------------------------------------------------------------------------------|-----|---------|---------|------|---------|---------|
| AT3G48240 | <i>AT3G48240</i> | Octicosaepptide/Phox/Bem1p family protein                                         | 2.4 | 1.2E-02 | 3.8E-02 | -1.9 | 1.2E-01 | 3.4E-01 |
| AT2G21330 | <i>FBA1</i>      | fructose-bisphosphate aldolase 1                                                  | 2.4 | 3.2E-08 | 7.3E-07 | 1.2  | 1.8E-01 | 4.3E-01 |
| AT5G62490 | <i>HVA22B</i>    | HVA22 homologue B                                                                 | 2.4 | 8.7E-03 | 2.9E-02 | 1.3  | 4.1E-01 | 6.7E-01 |
| AT3G08505 | <i>AT3G08505</i> | zinc finger (CCCH-type/C3HC4-type RING finger) family protein                     | 2.4 | 1.7E-10 | 7.8E-09 | -1.1 | 4.8E-01 | 7.2E-01 |
| AT5G04140 | <i>GLU1</i>      | glutamate synthase 1                                                              | 2.4 | 4.5E-07 | 7.1E-06 | 1.1  | 3.5E-01 | 6.1E-01 |
| AT5G14700 | <i>AT5G14700</i> | NAD(P)-binding Rossmann-fold superfamily protein                                  | 2.4 | 3.0E-07 | 4.9E-06 | -1.3 | 4.7E-02 | 2.0E-01 |
| AT1G24090 | <i>AT1G24090</i> | RNase H family protein                                                            | 2.4 | 1.4E-03 | 6.6E-03 | 1.7  | 4.1E-02 | 1.8E-01 |
| AT5G55620 | <i>AT5G55620</i> | hypothetical protein                                                              | 2.4 | 9.7E-07 | 1.4E-05 | -1.3 | 7.2E-02 | 2.5E-01 |
| AT5G15910 | <i>AT5G15910</i> | NAD(P)-binding Rossmann-fold superfamily protein                                  | 2.4 | 1.6E-15 | 3.3E-13 | 1.1  | 3.4E-01 | 6.0E-01 |
| AT2G23600 | <i>ACL</i>       | acetone-cyanohydrin lyase                                                         | 2.4 | 7.3E-08 | 1.5E-06 | -1.0 | 8.1E-01 | 9.3E-01 |
| AT5G38520 | <i>AT5G38520</i> | alpha/beta-Hydrolases superfamily protein                                         | 2.4 | 4.4E-10 | 1.8E-08 | 1.3  | 2.5E-02 | 1.3E-01 |
| AT2G28305 | <i>LOG1</i>      | Putative lysine decarboxylase family protein                                      | 2.4 | 1.4E-09 | 4.9E-08 | -1.3 | 2.0E-02 | 1.1E-01 |
| AT5G44550 | <i>AT5G44550</i> | Uncharacterized protein family (UPF0497)                                          | 2.4 | 6.8E-05 | 5.1E-04 | 1.3  | 1.5E-01 | 3.9E-01 |
| AT5G58260 | <i>NdhN</i>      | oxidoreductases, acting on NADH or NADPH, quinone or similar compound as acceptor | 2.3 | 1.2E-08 | 3.2E-07 | -1.1 | 5.0E-01 | 7.3E-01 |
| AT1G08270 | <i>AT1G08270</i> | vacuolar protein sorting-associated protein                                       | 2.3 | 9.1E-04 | 4.5E-03 | 1.3  | 3.4E-01 | 6.1E-01 |
| AT5G13370 | <i>AT5G13370</i> | Auxin-responsive GH3 family protein                                               | 2.3 | 5.9E-13 | 5.7E-11 | 1.1  | 1.7E-01 | 4.1E-01 |
| AT5G08720 | <i>AT5G08720</i> | polyketide cyclase/dehydrase/lipid transporter                                    | 2.3 | 3.6E-08 | 7.9E-07 | 1.3  | 1.8E-02 | 1.1E-01 |
| AT5G43290 | <i>WRKY49</i>    | WRKY DNA-binding protein 49                                                       | 2.3 | 4.3E-05 | 3.5E-04 | 1.4  | 5.9E-02 | 2.2E-01 |
| AT5G20070 | <i>NUDX19</i>    | nudix hydrolase homolog 19                                                        | 2.3 | 1.1E-17 | 4.0E-15 | -1.1 | 8.6E-02 | 2.8E-01 |
| AT1G10657 | <i>AT1G10657</i> | transmembrane protein                                                             | 2.3 | 3.3E-06 | 4.0E-05 | -1.2 | 2.9E-01 | 5.5E-01 |
| AT2G30420 | <i>ETC2</i>      | Homeodomain-like superfamily protein                                              | 2.3 | 1.4E-02 | 4.2E-02 | -1.0 | 9.2E-01 | 9.7E-01 |
| AT2G01590 | <i>CRR3</i>      | chlororespiratory reduction 3                                                     | 2.3 | 2.0E-08 | 4.8E-07 | 1.5  | 7.1E-04 | 1.3E-02 |
| AT1G55910 | <i>ZIP11</i>     | zinc transporter 11 precursor                                                     | 2.3 | 9.9E-11 | 4.9E-09 | -1.2 | 4.6E-02 | 1.9E-01 |
| AT4G14210 | <i>PDS3</i>      | phytoene desaturase 3                                                             | 2.3 | 3.9E-12 | 2.9E-10 | 1.2  | 3.0E-02 | 1.5E-01 |
| AT1G17220 | <i>FUG1</i>      | Translation initiation factor 2, small GTP-binding protein                        | 2.3 | 3.7E-09 | 1.2E-07 | 1.3  | 1.8E-02 | 1.1E-01 |
| AT5G21482 | <i>CKX7</i>      | cytokinin oxidase 7                                                               | 2.3 | 5.3E-07 | 8.2E-06 | 1.7  | 4.3E-04 | 9.0E-03 |
| AT3G09160 | <i>AT3G09160</i> | RNA-binding (RRM/RBD/RNP motifs) family protein                                   | 2.3 | 1.5E-05 | 1.4E-04 | 2.0  | 3.2E-04 | 7.2E-03 |
| AT4G22200 | <i>KT2/3</i>     | potassium transport 2/3                                                           | 2.3 | 3.1E-07 | 5.1E-06 | -1.5 | 6.5E-03 | 5.5E-02 |
| AT4G30470 | <i>AT4G30470</i> | NAD(P)-binding Rossmann-fold superfamily protein                                  | 2.3 | 2.9E-10 | 1.3E-08 | -1.6 | 3.6E-05 | 1.6E-03 |
| AT4G06744 | <i>AT4G06744</i> | Leucine-rich repeat (LRR) family protein                                          | 2.3 | 9.1E-09 | 2.4E-07 | 1.0  | 8.2E-01 | 9.3E-01 |
| AT5G51010 | <i>AT5G51010</i> | Rubredoxin-like superfamily protein                                               | 2.3 | 3.0E-12 | 2.3E-10 | 1.2  | 1.5E-02 | 9.6E-02 |
| AT1G63580 | <i>AT1G63580</i> | Receptor-like protein kinase-related family protein                               | 2.3 | 1.3E-02 | 3.9E-02 | 1.4  | 3.5E-01 | 6.1E-01 |
| AT1G16390 | <i>OCT3</i>      | organic cation/carnitine transporter 3                                            | 2.3 | 3.2E-06 | 3.9E-05 | -1.4 | 2.8E-02 | 1.4E-01 |
| AT5G47870 | <i>RAD52-2</i>   | cobalt ion-binding protein                                                        | 2.3 | 9.0E-14 | 1.1E-11 | 1.0  | 8.1E-01 | 9.2E-01 |
| AT2G30424 | <i>TCL2</i>      | Homeodomain-like superfamily protein                                              | 2.3 | 3.8E-07 | 6.1E-06 | 1.1  | 4.5E-01 | 7.0E-01 |
| AT5G23120 | <i>HCF136</i>    | photosystem II stability/assembly factor, chloroplast (HCF136)                    | 2.3 | 1.7E-09 | 6.0E-08 | 1.2  | 4.4E-02 | 1.9E-01 |
| AT3G62930 | <i>AT3G62930</i> | Thioredoxin superfamily protein                                                   | 2.3 | 1.4E-05 | 1.3E-04 | 1.3  | 1.9E-01 | 4.5E-01 |
| AT4G20860 | <i>AT4G20860</i> | FAD-binding Berberine family protein                                              | 2.3 | 3.3E-08 | 7.4E-07 | -1.1 | 5.8E-01 | 7.9E-01 |
| AT1G14345 | <i>AT1G14345</i> | NAD(P)-linked oxidoreductase superfamily protein                                  | 2.3 | 2.9E-09 | 9.1E-08 | 1.3  | 1.7E-02 | 1.0E-01 |
| AT1G68010 | <i>HPR</i>       | hydroxypyruvate reductase                                                         | 2.3 | 8.4E-08 | 1.7E-06 | 1.2  | 2.3E-01 | 4.9E-01 |
| AT3G49160 | <i>AT3G49160</i> | pyruvate kinase family protein                                                    | 2.3 | 6.1E-05 | 4.7E-04 | -1.7 | 1.1E-02 | 7.8E-02 |
| AT3G19800 | <i>AT3G19800</i> | E3 ubiquitin-protein ligase, putative (DUF177)                                    | 2.3 | 2.0E-09 | 6.8E-08 | 1.3  | 3.2E-02 | 1.5E-01 |
| AT5G50240 | <i>PIMT2</i>     | protein-l-isoaspartate methyltransferase 2                                        | 2.3 | 2.6E-10 | 1.2E-08 | -1.2 | 7.9E-02 | 2.7E-01 |
| AT2G27290 | <i>AT2G27290</i> | FAM210B-like protein, putative (DUF1279)                                          | 2.3 | 9.4E-10 | 3.5E-08 | 1.1  | 1.8E-01 | 4.3E-01 |
| AT2G40340 | <i>DREB2C</i>    | Integrase-type DNA-binding superfamily protein                                    | 2.3 | 2.5E-03 | 1.1E-02 | 1.5  | 1.6E-01 | 4.0E-01 |
| AT1G70610 | <i>ABC26</i>     | transporter associated with antigen processing protein 1                          | 2.3 | 3.9E-08 | 8.5E-07 | 1.1  | 2.8E-01 | 5.5E-01 |
| AT5G18660 | <i>PCB2</i>      | NAD(P)-binding Rossmann-fold superfamily protein                                  | 2.3 | 1.5E-05 | 1.4E-04 | 1.6  | 6.4E-03 | 5.5E-02 |
| AT1G33102 | <i>AT1G33102</i> | hypothetical protein                                                              | 2.3 | 4.3E-03 | 1.6E-02 | 1.3  | 3.3E-01 | 5.9E-01 |
| AT1G80030 | <i>AT1G80030</i> | Molecular chaperone Hsp40/DnaJ family protein                                     | 2.3 | 1.2E-12 | 1.0E-10 | 1.1  | 3.3E-01 | 6.0E-01 |
| AT1G61890 | <i>AT1G61890</i> | MATE efflux family protein                                                        | 2.3 | 8.6E-11 | 4.4E-09 | -1.5 | 4.5E-05 | 1.9E-03 |
| AT4G34090 | <i>AT4G34090</i> | cyclin delta-3                                                                    | 2.3 | 3.6E-09 | 1.1E-07 | 1.3  | 3.9E-02 | 1.7E-01 |
| AT2G29450 | <i>GSTU5</i>     | glutathione S-transferase tau 5                                                   | 2.3 | 1.3E-11 | 8.3E-10 | 1.2  | 8.1E-02 | 2.7E-01 |
| AT5G65870 | <i>PSK5</i>      | phytosulfokine 5 precursor                                                        | 2.3 | 1.2E-06 | 1.7E-05 | -1.8 | 4.7E-04 | 9.5E-03 |
| AT1G26500 | <i>AT1G26500</i> | Pentatricopeptide repeat (PPR) superfamily protein                                | 2.3 | 1.6E-03 | 7.2E-03 | 1.3  | 2.9E-01 | 5.5E-01 |
| AT4G15765 | <i>AT4G15765</i> | FAD/NAD(P)-binding oxidoreductase family protein                                  | 2.3 | 4.0E-06 | 4.6E-05 | -1.2 | 3.5E-01 | 6.1E-01 |
| AT5G08050 | <i>AT5G08050</i> | wiskott-aldrich syndrome family protein, putative (DUF1118)                       | 2.3 | 1.9E-09 | 6.4E-08 | 1.4  | 1.6E-03 | 2.2E-02 |
| AT4G15440 | <i>HPL1</i>      | hydroperoxide lyase 1                                                             | 2.3 | 8.9E-03 | 3.0E-02 | -1.5 | 2.6E-01 | 5.3E-01 |
| AT2G39470 | <i>PnsL1</i>     | PsbP-like protein 2                                                               | 2.3 | 7.4E-07 | 1.1E-05 | 1.5  | 5.9E-03 | 5.2E-02 |
| AT5G16010 | <i>AT5G16010</i> | 3-oxo-5-alpha-steroid 4-dehydrogenase family protein                              | 2.3 | 5.5E-11 | 3.0E-09 | 1.3  | 5.4E-03 | 4.9E-02 |
| AT1G05340 | <i>AT1G05340</i> | cysteine-rich TM module stress tolerance protein                                  | 2.3 | 3.9E-04 | 2.2E-03 | 1.0  | 8.4E-01 | 9.4E-01 |
| AT1G64500 | <i>AT1G64500</i> | Glutaredoxin family protein                                                       | 2.3 | 1.1E-09 | 4.0E-08 | -1.0 | 9.5E-01 | 9.9E-01 |
| AT3G17800 | <i>AT3G17800</i> | alanine-tRNA ligase, putative (DUF760)                                            | 2.3 | 7.6E-12 | 5.2E-10 | 1.0  | 9.1E-01 | 9.7E-01 |
| AT1G71140 | <i>AT1G71140</i> | MATE efflux family protein                                                        | 2.3 | 2.1E-03 | 8.8E-03 | -1.1 | 6.9E-01 | 8.6E-01 |
| AT5G24460 | <i>AT5G24460</i> | RING-H2 zinc finger protein                                                       | 2.3 | 6.6E-12 | 4.6E-10 | -1.0 | 6.6E-01 | 8.4E-01 |
| AT3G16220 | <i>AT3G16220</i> | Putative eukaryotic LigT                                                          | 2.3 | 5.4E-08 | 1.1E-06 | 1.3  | 4.3E-02 | 1.8E-01 |
| AT3G15352 | <i>COX17</i>     | cytochrome c oxidase 17                                                           | 2.3 | 6.6E-06 | 7.1E-05 | -1.2 | 2.5E-01 | 5.1E-01 |
| AT3G01060 | <i>AT3G01060</i> | lysine-tRNA ligase                                                                | 2.3 | 6.0E-09 | 1.7E-07 | 1.2  | 7.0E-02 | 2.5E-01 |
| AT2G25080 | <i>GPX1</i>      | glutathione peroxidase 1                                                          | 2.3 | 1.6E-06 | 2.1E-05 | 1.3  | 6.8E-02 | 2.4E-01 |
| AT2G40330 | <i>PYL6</i>      | PYR1-like 6                                                                       | 2.3 | 1.9E-03 | 8.1E-03 | 2.0  | 6.5E-03 | 5.5E-02 |
| AT4G36580 | <i>AT4G36580</i> | AAA-type ATPase family protein                                                    | 2.3 | 8.1E-06 | 8.4E-05 | 1.3  | 1.4E-01 | 3.8E-01 |
| AT4G06746 | <i>RAP2.9</i>    | related to AP2 9                                                                  | 2.3 | 4.5E-03 | 1.7E-02 | 1.0  | 9.5E-01 | 9.8E-01 |
| AT2G25620 | <i>DBP1</i>      | DNA-binding protein phosphatase 1                                                 | 2.3 | 1.1E-12 | 9.9E-11 | 1.0  | 5.7E-01 | 7.9E-01 |
| AT1G05562 | <i>AT1G05562</i> | Natural antisense transcript overlaps with AT1G05560                              | 2.3 | 6.0E-08 | 1.2E-06 | 1.3  | 2.5E-02 | 1.3E-01 |
| AT5G27290 | <i>AT5G27290</i> | stress regulated protein                                                          | 2.3 | 1.4E-06 | 1.9E-05 | 1.5  | 6.1E-03 | 5.3E-02 |
| AT4G34990 | <i>MYB32</i>     | myb domain protein 32                                                             | 2.3 | 2.7E-06 | 3.3E-05 | 1.4  | 2.0E-02 | 1.1E-01 |

|           |                  |                                                                                 |     |         |         |      |         |         |
|-----------|------------------|---------------------------------------------------------------------------------|-----|---------|---------|------|---------|---------|
| AT4G21380 | <i>RK3</i>       | receptor kinase 3                                                               | 2.3 | 9.3E-03 | 3.1E-02 | 1.3  | 3.8E-01 | 6.4E-01 |
| AT1G36160 | <i>ACC1</i>      | acetyl-CoA carboxylase 1                                                        | 2.3 | 3.6E-13 | 3.7E-11 | -1.0 | 8.8E-01 | 9.6E-01 |
| AT4G28250 | <i>EXPB3</i>     | expansin B3                                                                     | 2.3 | 1.3E-06 | 1.8E-05 | 1.1  | 4.8E-01 | 7.2E-01 |
| AT2G05510 | <i>AT2G05510</i> | Glycine-rich protein family                                                     | 2.3 | 3.3E-03 | 1.3E-02 | -1.1 | 8.3E-01 | 9.3E-01 |
| AT1G26761 | <i>AT1G26761</i> | Arabinanase/levansucrase/invertase                                              | 2.3 | 9.5E-08 | 1.8E-06 | 1.5  | 1.0E-03 | 1.6E-02 |
| AT5G17300 | <i>RVE1</i>      | Homeodomain-like superfamily protein                                            | 2.3 | 5.6E-09 | 1.6E-07 | 1.2  | 1.5E-01 | 3.9E-01 |
| AT4G27520 | <i>ENODL2</i>    | early nodulin-like protein 2                                                    | 2.3 | 6.4E-08 | 1.3E-06 | 1.5  | 2.4E-03 | 2.8E-02 |
| AT5G47650 | <i>NUDT2</i>     | nudix hydrolase homolog 2                                                       | 2.3 | 5.1E-13 | 5.1E-11 | 1.0  | 5.8E-01 | 7.9E-01 |
| AT5G15340 | <i>AT5G15340</i> | Pentatricopeptide repeat (PPR) superfamily protein                              | 2.3 | 5.9E-04 | 3.2E-03 | 1.6  | 4.0E-02 | 1.8E-01 |
| AT1G11790 | <i>ADT1</i>      | arogenate dehydratase 1                                                         | 2.3 | 1.4E-08 | 3.4E-07 | 1.1  | 2.4E-01 | 5.0E-01 |
| AT1G71480 | <i>AT1G71480</i> | Nuclear transport factor 2 (NTF2) family protein                                | 2.3 | 1.8E-09 | 6.2E-08 | -1.1 | 3.2E-01 | 5.8E-01 |
| AT5G24130 | <i>AT5G24130</i> | polypyrimidine tract-binding-like protein                                       | 2.3 | 1.0E-04 | 7.1E-04 | -1.2 | 3.4E-01 | 6.1E-01 |
| AT1G32870 | <i>NAC13</i>     | NAC domain protein 13                                                           | 2.3 | 6.8E-12 | 4.7E-10 | -1.0 | 9.6E-01 | 9.9E-01 |
| AT5G22630 | <i>ADT5</i>      | arogenate dehydratase 5                                                         | 2.3 | 2.1E-09 | 7.1E-08 | 1.1  | 3.3E-01 | 5.9E-01 |
| AT5G06220 | <i>AT5G06220</i> | LETM1-like protein                                                              | 2.3 | 2.8E-12 | 2.2E-10 | 1.2  | 7.0E-02 | 2.5E-01 |
| AT3G01440 | <i>PnsL3</i>     | PsbQ-like 1                                                                     | 2.3 | 2.3E-06 | 2.9E-05 | -1.1 | 4.7E-01 | 7.1E-01 |
| AT1G05065 | <i>CLE20</i>     | CLAVATA3/ESR-RELATED 20                                                         | 2.3 | 7.2E-04 | 3.7E-03 | -1.6 | 8.6E-02 | 2.8E-01 |
| AT3G14900 | <i>EMB3120</i>   | hypothetical protein                                                            | 2.3 | 5.1E-04 | 2.8E-03 | 1.8  | 8.5E-03 | 6.6E-02 |
| AT5G20140 | <i>HBP5</i>      | SOUL heme-binding family protein                                                | 2.3 | 6.4E-09 | 1.8E-07 | 1.1  | 2.0E-01 | 4.6E-01 |
| AT4G08390 | <i>SAPX</i>      | stromal ascorbate peroxidase                                                    | 2.3 | 8.5E-15 | 1.3E-12 | 1.1  | 3.6E-01 | 6.2E-01 |
| AT1G43670 | <i>FBP</i>       | Inositol monophosphatase family protein                                         | 2.3 | 4.5E-08 | 9.6E-07 | 1.3  | 4.7E-02 | 2.0E-01 |
| AT4G39710 | <i>PnsL4</i>     | FK506-binding protein 16-2                                                      | 2.3 | 2.1E-07 | 3.6E-06 | -1.0 | 9.2E-01 | 9.7E-01 |
| AT1G15510 | <i>ECB2</i>      | Tetratricopeptide repeat (TPR)-like superfamily protein                         | 2.3 | 5.1E-08 | 1.1E-06 | 1.1  | 6.0E-01 | 8.1E-01 |
| AT3G30775 | <i>ERD5</i>      | Methylenetetrahydrofolate reductase family                                      | 2.3 | 3.1E-10 | 1.3E-08 | -1.5 | 1.2E-04 | 3.5E-03 |
| AT1G47760 | <i>AGL102</i>    | AGAMOUS-like 102                                                                | 2.3 | 1.3E-03 | 6.2E-03 | -1.1 | 6.9E-01 | 8.6E-01 |
| AT4G25130 | <i>PMSR4</i>     | peptide met sulfoxide reductase 4                                               | 2.3 | 1.8E-14 | 2.5E-12 | 1.1  | 2.9E-01 | 5.6E-01 |
| AT2G47180 | <i>GolS1</i>     | galactinol synthase 1                                                           | 2.3 | 2.4E-05 | 2.1E-04 | 1.2  | 3.6E-01 | 6.2E-01 |
| AT1G22850 | <i>AT1G22850</i> | SNARE associated Golgi protein family                                           | 2.2 | 8.1E-12 | 5.4E-10 | 1.4  | 1.2E-04 | 3.6E-03 |
| AT1G29640 | <i>AT1G29640</i> | senescence regulator (Protein of unknown function, DUF584)                      | 2.2 | 1.7E-06 | 2.2E-05 | -1.1 | 7.4E-01 | 8.8E-01 |
| AT1G29420 | <i>AT1G29420</i> | SAUR-like auxin-responsive protein family                                       | 2.2 | 1.7E-02 | 4.9E-02 | -2.6 | 2.0E-02 | 1.1E-01 |
| AT5G14660 | <i>PDF1B</i>     | peptide deformylase 1B                                                          | 2.2 | 2.9E-10 | 1.3E-08 | 1.1  | 5.3E-01 | 7.6E-01 |
| AT1G58340 | <i>ZF14</i>      | MATE efflux family protein                                                      | 2.2 | 1.5E-07 | 2.7E-06 | 1.6  | 1.1E-03 | 1.6E-02 |
| AT1G35720 | <i>ANNAT1</i>    | annexin 1                                                                       | 2.2 | 9.4E-06 | 9.5E-05 | -1.3 | 1.4E-01 | 3.8E-01 |
| AT2G30150 | <i>AT2G30150</i> | UDP-Glycosyltransferase superfamily protein                                     | 2.2 | 3.4E-10 | 1.5E-08 | -1.0 | 6.9E-01 | 8.6E-01 |
| AT4G30610 | <i>BRS1</i>      | alpha/beta-Hydrolases superfamily protein                                       | 2.2 | 4.9E-07 | 7.6E-06 | 1.1  | 5.6E-01 | 7.8E-01 |
| AT4G24120 | <i>YSL1</i>      | YELLOW STRIPE like 1                                                            | 2.2 | 1.2E-04 | 8.1E-04 | -1.3 | 1.9E-01 | 4.4E-01 |
| AT3G26960 | <i>AT3G26960</i> | Pollen Ole e 1 allergen and extensin family protein                             | 2.2 | 8.7E-03 | 2.9E-02 | 1.2  | 5.9E-01 | 8.0E-01 |
| AT1G62630 | <i>AT1G62630</i> | Disease resistance protein (CC-NBS-LRR class)                                   | 2.2 | 6.5E-06 | 7.0E-05 | 1.0  | 8.8E-01 | 9.5E-01 |
| AT4G26260 | <i>MIOX4</i>     | myo-inositol oxygenase 4                                                        | 2.2 | 2.5E-04 | 1.5E-03 | -1.8 | 6.7E-03 | 5.6E-02 |
| AT1G68870 | <i>SOFL2</i>     | SOB five-like 2                                                                 | 2.2 | 1.4E-04 | 9.4E-04 | 1.4  | 7.6E-02 | 2.6E-01 |
| AT3G55630 | <i>DFD</i>       | DHFS-FPGS homolog D                                                             | 2.2 | 1.3E-06 | 1.7E-05 | 1.1  | 5.3E-01 | 7.6E-01 |
| AT3G25250 | <i>AGC2-1</i>    | AGC (cAMP-dependent, cGMP-dependent and protein kinase C) kinase family protein | 2.2 | 3.3E-05 | 2.8E-04 | 1.1  | 6.1E-01 | 8.1E-01 |
| AT4G28680 | <i>TYRDC</i>     | L-tyrosine decarboxylase                                                        | 2.2 | 1.2E-02 | 3.7E-02 | -1.3 | 4.4E-01 | 6.9E-01 |
| AT1G71500 | <i>AT1G71500</i> | Rieske (2Fe-2S) domain-containing protein                                       | 2.2 | 2.6E-10 | 1.2E-08 | 1.2  | 2.3E-02 | 1.3E-01 |
| AT3G55330 | <i>PPL1</i>      | PsbP-like protein 1                                                             | 2.2 | 3.1E-06 | 3.7E-05 | 1.3  | 1.1E-01 | 3.3E-01 |
| AT2G16430 | <i>PAP10</i>     | purple acid phosphatase 10                                                      | 2.2 | 2.4E-09 | 7.7E-08 | 1.2  | 8.7E-02 | 2.8E-01 |
| AT1G05690 | <i>BT3</i>       | BTB and TAZ domain protein 3                                                    | 2.2 | 1.1E-05 | 1.1E-04 | -1.0 | 8.8E-01 | 9.6E-01 |
| AT2G30390 | <i>FC2</i>       | ferrochelatase 2                                                                | 2.2 | 1.2E-09 | 4.2E-08 | 1.2  | 1.5E-01 | 3.9E-01 |
| AT3G54090 | <i>FLN1</i>      | fructokinase-like 1                                                             | 2.2 | 2.3E-08 | 5.4E-07 | 1.6  | 7.7E-05 | 2.7E-03 |
| AT2G29340 | <i>AT2G29340</i> | NAD-dependent epimerase/dehydratase family protein                              | 2.2 | 2.7E-08 | 6.2E-07 | 1.3  | 2.0E-02 | 1.2E-01 |
| AT1G75690 | <i>LQY1</i>      | DnaJ/Hsp40 cysteine-rich domain superfamily protein                             | 2.2 | 1.7E-09 | 6.0E-08 | 1.3  | 1.2E-02 | 8.4E-02 |
| AT2G19800 | <i>MIOX2</i>     | myo-inositol oxygenase 2                                                        | 2.2 | 9.8E-08 | 1.9E-06 | -1.4 | 4.1E-03 | 4.1E-02 |
| AT5G24990 | <i>AT5G24990</i> | enhanced disease resistance-like protein                                        | 2.2 | 3.5E-06 | 4.1E-05 | 1.3  | 6.4E-02 | 2.3E-01 |
| AT5G23170 | <i>AT5G23170</i> | Protein kinase superfamily protein                                              | 2.2 | 1.2E-06 | 1.7E-05 | -1.1 | 6.1E-01 | 8.1E-01 |
| AT1G65190 | <i>AT1G65190</i> | Protein kinase superfamily protein                                              | 2.2 | 1.4E-08 | 3.5E-07 | 1.0  | 9.1E-01 | 9.7E-01 |
| AT5G08070 | <i>TCP17</i>     | TCP domain protein 17                                                           | 2.2 | 2.0E-05 | 1.8E-04 | 1.5  | 2.2E-02 | 1.2E-01 |
| AT5G38660 | <i>APE1</i>      | acclimation of photosynthesis to environment                                    | 2.2 | 1.4E-10 | 6.7E-09 | 1.3  | 1.1E-02 | 7.7E-02 |
| AT3G14810 | <i>MSL5</i>      | mechanosensitive channel of small conductance-like 5                            | 2.2 | 6.7E-07 | 1.0E-05 | -1.1 | 6.5E-01 | 8.3E-01 |
| AT5G43630 | <i>TZP</i>       | zinc knuckle (CCHC-type) family protein                                         | 2.2 | 4.6E-12 | 3.4E-10 | 1.0  | 5.8E-01 | 7.9E-01 |
| AT1G70700 | <i>TIFY7</i>     | TIFY domain/Divergent CCT motif family protein                                  | 2.2 | 5.7E-10 | 2.2E-08 | 1.2  | 1.1E-01 | 3.2E-01 |
| AT5G47250 | <i>AT5G47250</i> | LRR and NB-ARC domains-containing disease resistance protein                    | 2.2 | 7.2E-06 | 7.6E-05 | 1.1  | 7.5E-01 | 8.9E-01 |
| AT2G46450 | <i>CNGC12</i>    | cyclic nucleotide-gated channel 12                                              | 2.2 | 1.9E-09 | 6.5E-08 | 1.4  | 2.3E-03 | 2.8E-02 |
| AT3G04790 | <i>EMB3119</i>   | Ribose 5-phosphate isomerase, type A protein                                    | 2.2 | 1.0E-07 | 1.9E-06 | 1.1  | 4.0E-01 | 6.6E-01 |
| AT3G17930 | <i>DAC</i>       | transmembrane protein                                                           | 2.2 | 1.3E-10 | 6.2E-09 | 1.1  | 3.0E-01 | 5.6E-01 |
| AT2G33530 | <i>scpl46</i>    | serine carboxypeptidase-like 46                                                 | 2.2 | 5.7E-06 | 6.2E-05 | -1.1 | 5.5E-01 | 7.7E-01 |
| AT5G13360 | <i>AT5G13360</i> | Auxin-responsive GH3 family protein                                             | 2.2 | 2.1E-12 | 1.7E-10 | 1.2  | 6.4E-02 | 2.3E-01 |
| AT1G68440 | <i>AT1G68440</i> | transmembrane protein                                                           | 2.2 | 2.5E-14 | 3.3E-12 | -1.4 | 1.3E-05 | 8.5E-04 |
| AT2G28605 | <i>AT2G28605</i> | Photosystem II reaction center PsbP family protein                              | 2.2 | 7.8E-06 | 8.1E-05 | 1.5  | 7.2E-03 | 5.9E-02 |
| AT2G26040 | <i>PYL2</i>      | PYR1-like 2                                                                     | 2.2 | 2.0E-03 | 8.6E-03 | 1.7  | 3.9E-02 | 1.7E-01 |
| AT1G67360 | <i>AT1G67360</i> | Rubber elongation factor protein (REF)                                          | 2.2 | 4.7E-11 | 2.6E-09 | -1.1 | 2.4E-01 | 5.0E-01 |
| AT1G07510 | <i>ftsh10</i>    | FTSH protease 10                                                                | 2.2 | 7.5E-17 | 2.3E-14 | -1.1 | 2.5E-01 | 5.2E-01 |
| AT5G54130 | <i>AT5G54130</i> | Calcium-binding endonuclease/exonuclease/phosphatase family                     | 2.2 | 5.2E-09 | 1.5E-07 | -1.2 | 4.6E-02 | 1.9E-01 |
| AT1G07985 | <i>AT1G07985</i> | Expressed protein                                                               | 2.2 | 5.8E-06 | 6.4E-05 | -1.5 | 1.3E-02 | 8.8E-02 |
| AT5G54960 | <i>PDC2</i>      | pyruvate decarboxylase-2                                                        | 2.2 | 5.2E-11 | 2.8E-09 | -1.3 | 2.8E-03 | 3.2E-02 |

|           |           |                                                                                                           |     |         |         |      |         |         |
|-----------|-----------|-----------------------------------------------------------------------------------------------------------|-----|---------|---------|------|---------|---------|
| AT4G31398 | AT4G31398 | Natural antisense transcript overlaps with AT4G31400                                                      | 2.2 | 1.5E-02 | 4.5E-02 | 1.2  | 6.2E-01 | 8.2E-01 |
| AT4G02530 | AT4G02530 | chloroplast thylakoid lumen protein                                                                       | 2.2 | 4.0E-10 | 1.6E-08 | 1.2  | 3.8E-02 | 1.7E-01 |
| AT5G20380 | PHT4      |                                                                                                           | 2.2 | 1.5E-12 | 1.3E-10 | 1.2  | 4.2E-02 | 1.8E-01 |
| AT1G61470 | AT1G61470 | Polynucleotidyl transferase, ribonuclease H-like superfamily protein                                      | 2.2 | 5.2E-03 | 1.9E-02 | 2.0  | 1.5E-02 | 9.7E-02 |
| AT5G01600 | FER1      | ferretin 1                                                                                                | 2.2 | 2.5E-05 | 2.2E-04 | -1.6 | 4.9E-03 | 4.6E-02 |
| AT5G13630 | GUN5      | magnesium-chelatase subunit chlH, chloroplast, putative / Mg-protoporphyrin IX chelatase, putative (CHLH) | 2.2 | 1.3E-07 | 2.4E-06 | 1.5  | 3.1E-03 | 3.4E-02 |
| AT2G28880 | emb1997   | para-aminobenzoate (PABA) synthase family                                                                 | 2.2 | 4.0E-08 | 8.7E-07 | 1.1  | 5.3E-01 | 7.5E-01 |
| AT3G13680 | AT3G13680 | F-box and associated interaction domains-containing protein                                               | 2.2 | 1.4E-02 | 4.2E-02 | 1.3  | 3.6E-01 | 6.3E-01 |
| AT5G03210 | DIP2      | E3 ubiquitin-protein ligase                                                                               | 2.2 | 7.0E-03 | 2.4E-02 | -1.5 | 2.1E-01 | 4.6E-01 |
| AT4G21940 | CPK15     | calcium-dependent protein kinase 15                                                                       | 2.2 | 1.3E-05 | 1.3E-04 | 1.1  | 6.5E-01 | 8.3E-01 |
| AT2G38060 | PHT4      |                                                                                                           | 2.2 | 1.2E-05 | 1.2E-04 | -1.1 | 6.3E-01 | 8.2E-01 |
| AT3G59250 | AT3G59250 | F-box/RNI-like superfamily protein                                                                        | 2.2 | 3.0E-05 | 2.5E-04 | 1.7  | 2.1E-03 | 2.6E-02 |
| AT1G75460 | AT1G75460 | ATP-dependent protease La (LON) domain protein                                                            | 2.2 | 1.3E-07 | 2.3E-06 | 1.1  | 2.7E-01 | 5.4E-01 |
| AT5G08150 | SOB5      | suppressor of phytochrome b 5                                                                             | 2.2 | 8.0E-04 | 4.1E-03 | -1.4 | 1.7E-01 | 4.1E-01 |
| AT1G70760 | NdhL      | inorganic carbon transport protein-like protein                                                           | 2.2 | 3.3E-07 | 5.4E-06 | 1.4  | 1.3E-02 | 8.9E-02 |
| AT2G29360 | AT2G29360 | NAD(P)-binding Rossmann-fold superfamily protein                                                          | 2.2 | 6.8E-08 | 1.4E-06 | 1.2  | 2.1E-01 | 4.6E-01 |
| AT1G16310 | AT1G16310 | Cation efflux family protein                                                                              | 2.2 | 4.5E-08 | 9.6E-07 | 1.1  | 3.9E-01 | 6.5E-01 |
| AT1G64900 | CYP89A2   | cytochrome P450, family 89, subfamily A, polypeptide 2                                                    | 2.2 | 4.4E-04 | 2.5E-03 | 1.1  | 7.0E-01 | 8.6E-01 |
| AT3G04870 | ZDS       | zeta-carotene desaturase                                                                                  | 2.2 | 5.7E-10 | 2.2E-08 | 1.1  | 3.7E-01 | 6.3E-01 |
| AT4G11175 | AT4G11175 | Nucleic acid-binding, OB-fold-like protein                                                                | 2.2 | 1.3E-06 | 1.8E-05 | 1.3  | 7.2E-02 | 2.5E-01 |
| AT4G37000 | ACD2      | accelerated cell death 2 (ACD2)                                                                           | 2.2 | 1.7E-09 | 6.0E-08 | -1.0 | 6.5E-01 | 8.3E-01 |
| AT2G42770 | AT2G42770 | Peroxisomal membrane 22 kDa (Mpv17/PMP22) family protein                                                  | 2.2 | 9.8E-11 | 4.9E-09 | 1.3  | 8.8E-03 | 6.8E-02 |
| AT1G52510 | AT1G52510 | alpha/beta-Hydrolases superfamily protein                                                                 | 2.2 | 1.1E-08 | 2.8E-07 | 1.5  | 8.1E-04 | 1.4E-02 |
| AT3G63140 | CSP41A    | chloroplast stem-loop binding protein of 41 kDa                                                           | 2.2 | 4.5E-08 | 9.6E-07 | 1.2  | 1.7E-01 | 4.1E-01 |
| AT1G48870 | AT1G48870 | Transducin/WD40 repeat-like superfamily protein                                                           | 2.2 | 6.0E-05 | 4.6E-04 | 1.4  | 5.7E-02 | 2.2E-01 |
| AT5G62200 | AT5G62200 | Embryo-specific protein 3, (ATS3)                                                                         | 2.2 | 7.1E-09 | 2.0E-07 | -1.1 | 4.8E-01 | 7.2E-01 |
| AT1G09850 | XBCP3     | xylem bark cysteine peptidase 3                                                                           | 2.2 | 1.1E-12 | 9.5E-11 | -1.3 | 3.8E-03 | 3.9E-02 |
| AT1G35515 | HOS10     | high response to osmotic stress 10                                                                        | 2.2 | 5.8E-05 | 4.5E-04 | -1.3 | 1.7E-01 | 4.1E-01 |
| AT4G34240 | ALDH3I1   | aldehyde dehydrogenase 3I1                                                                                | 2.2 | 7.2E-09 | 2.0E-07 | -1.0 | 7.1E-01 | 8.7E-01 |
| AT1G48850 | EMB1144   | chorismate synthase, putative / 5-enolpyruvylshikimate-3-phosphate phosphorylase                          | 2.2 | 4.2E-16 | 1.0E-13 | -1.0 | 8.7E-01 | 9.5E-01 |
| AT5G43750 | PnsB5     | NAD(P)H dehydrogenase 18                                                                                  | 2.2 | 1.0E-07 | 1.9E-06 | 1.1  | 2.8E-01 | 5.4E-01 |
| AT1G78290 | SNRK2-8   | Protein kinase superfamily protein                                                                        | 2.2 | 2.0E-09 | 6.7E-08 | 1.1  | 5.0E-01 | 7.3E-01 |
| AT2G40900 | UMAMIT11  | nodulin MtN21 /EamA-like transporter family                                                               | 2.2 | 2.5E-09 | 8.0E-08 | -1.1 | 2.8E-01 | 5.5E-01 |
| AT4G34730 | AT4G34730 | ribosome-binding factor A family protein                                                                  | 2.2 | 1.8E-10 | 8.5E-09 | 1.3  | 6.8E-03 | 5.7E-02 |
| AT3G59120 | AT3G59120 | Cysteine/Histidine-rich C1 domain family protein                                                          | 2.2 | 3.6E-04 | 2.1E-03 | 1.1  | 6.9E-01 | 8.6E-01 |
| AT5G56850 | AT5G56850 | hypothetical protein                                                                                      | 2.2 | 3.2E-07 | 5.3E-06 | 1.1  | 4.1E-01 | 6.6E-01 |
| AT5G41050 | AT5G41050 | Pollen Ole e 1 allergen and extensin family protein                                                       | 2.2 | 2.0E-06 | 2.5E-05 | -1.0 | 7.4E-01 | 8.8E-01 |
| AT5G26742 | emb1138   | DEAD box RNA helicase (RH3)                                                                               | 2.2 | 8.2E-09 | 2.2E-07 | 1.6  | 1.1E-04 | 3.3E-03 |
| AT5G24810 | AT5G24810 | ABC1 family protein                                                                                       | 2.2 | 8.2E-13 | 7.5E-11 | -1.1 | 2.2E-01 | 4.8E-01 |
| AT2G23670 | YCF37     | homolog of Synechocystis YCF37                                                                            | 2.2 | 5.5E-10 | 2.2E-08 | 1.3  | 1.6E-02 | 1.0E-01 |
| AT2G34660 | ABCC2     | multidrug resistance-associated protein 2                                                                 | 2.2 | 9.8E-14 | 1.2E-11 | -1.0 | 6.3E-01 | 8.2E-01 |
| AT3G17130 | AT3G17130 | Plant invertase/pectin methylesterase inhibitor superfamily protein                                       | 2.2 | 2.7E-03 | 1.1E-02 | -1.5 | 1.4E-01 | 3.7E-01 |
| AT4G14010 | RALFL32   | ralf-like 32                                                                                              | 2.1 | 9.4E-08 | 1.8E-06 | -1.0 | 7.7E-01 | 9.0E-01 |
| AT1G68660 | AT1G68660 | Ribosomal protein L12/ ATP-dependent Clp protease adaptor protein ClpS family protein                     | 2.1 | 1.7E-11 | 1.1E-09 | 1.1  | 3.0E-01 | 5.6E-01 |
| AT5G38980 | AT5G38980 | transmembrane protein                                                                                     | 2.1 | 9.5E-07 | 1.3E-05 | -1.6 | 9.9E-04 | 1.6E-02 |
| AT1G74730 | AT1G74730 | transmembrane protein, putative (DUF1118)                                                                 | 2.1 | 2.5E-09 | 8.2E-08 | 1.4  | 7.0E-04 | 1.2E-02 |
| AT5G22090 | AT5G22090 | FAF-like protein (DUF3049)                                                                                | 2.1 | 6.9E-06 | 7.4E-05 | 1.4  | 3.2E-02 | 1.5E-01 |
| AT5G61270 | PIF7      | phytochrome-interacting factor7                                                                           | 2.1 | 5.1E-07 | 7.9E-06 | 1.4  | 1.1E-02 | 7.7E-02 |
| AT4G34830 | MRL1      | Pentatricopeptide repeat (PPR) superfamily protein                                                        | 2.1 | 4.1E-07 | 6.6E-06 | 1.5  | 4.2E-03 | 4.2E-02 |
| AT2G41290 | SSL2      | strictosidine synthase-like 2                                                                             | 2.1 | 1.3E-06 | 1.8E-05 | 1.3  | 4.9E-02 | 2.0E-01 |
| AT5G49480 | CP1       | Ca2 -binding protein 1                                                                                    | 2.1 | 5.9E-11 | 3.1E-09 | 1.0  | 6.0E-01 | 8.1E-01 |
| AT3G57010 | AT3G57010 | Calcium-dependent phosphotriesterase superfamily protein                                                  | 2.1 | 2.0E-08 | 4.7E-07 | -1.1 | 5.1E-01 | 7.4E-01 |
| AT3G48030 | AT3G48030 | hypoxia-responsive family protein / zinc finger (C3HC4-type RING finger) family protein                   | 2.1 | 3.7E-10 | 1.5E-08 | 1.0  | 6.0E-01 | 8.1E-01 |
| AT3G12580 | HSP70     | heat shock protein 70                                                                                     | 2.1 | 6.5E-06 | 7.0E-05 | -1.5 | 1.1E-02 | 7.8E-02 |
| AT1G51440 | AT1G51440 | alpha/beta-Hydrolases superfamily protein                                                                 | 2.1 | 1.4E-02 | 4.4E-02 | 1.5  | 2.1E-01 | 4.7E-01 |
| AT3G48700 | CXE13     | carboxyesterase 13                                                                                        | 2.1 | 5.2E-05 | 4.1E-04 | 1.0  | 9.4E-01 | 9.8E-01 |
| AT5G64840 | ABCF5     | general control non-repressible 5                                                                         | 2.1 | 5.1E-08 | 1.1E-06 | 1.3  | 1.7E-02 | 1.0E-01 |
| AT1G56510 | WRR4      | Disease resistance protein (TIR-NBS-LRR class)                                                            | 2.1 | 6.8E-10 | 2.6E-08 | 1.1  | 2.3E-01 | 4.9E-01 |
| AT2G21320 | BBX18     | B-box zinc finger family protein                                                                          | 2.1 | 7.5E-07 | 1.1E-05 | 1.3  | 4.8E-02 | 2.0E-01 |
| AT2G14660 | AT2G14660 | thymocyte nuclear-like protein                                                                            | 2.1 | 5.9E-06 | 6.4E-05 | 1.1  | 4.2E-01 | 6.7E-01 |
| AT1G33560 | ADR1      | Disease resistance protein (CC-NBS-LRR class)                                                             | 2.1 | 7.2E-09 | 2.0E-07 | -1.3 | 8.8E-03 | 6.7E-02 |
| AT2G34630 | GPS1      | geranyl diphosphate synthase 1                                                                            | 2.1 | 2.2E-14 | 3.0E-12 | 1.2  | 2.4E-03 | 2.9E-02 |
| AT5G48470 | AT5G48470 | hypothetical protein                                                                                      | 2.1 | 1.6E-05 | 1.5E-04 | 1.4  | 4.1E-02 | 1.8E-01 |
| AT2G13360 | AGT       | alanine:glyoxylate aminotransferase                                                                       | 2.1 | 5.3E-07 | 8.1E-06 | 1.2  | 8.7E-02 | 2.8E-01 |
| AT4G32590 | AT4G32590 | 2Fe-2S ferredoxin-like superfamily protein                                                                | 2.1 | 1.2E-11 | 7.5E-10 | 1.2  | 1.9E-02 | 1.1E-01 |
| AT3G57180 | BPG2      | P-loop containing nucleoside triphosphate hydrolases superfamily protein                                  | 2.1 | 5.1E-09 | 1.5E-07 | 1.2  | 5.5E-02 | 2.1E-01 |
| AT4G36430 | AT4G36430 | Peroxidase superfamily protein                                                                            | 2.1 | 8.1E-03 | 2.7E-02 | 1.0  | 9.4E-01 | 9.8E-01 |
| AT5G45960 | AT5G45960 | GDSL-like Lipase/Acylhydrolase superfamily protein                                                        | 2.1 | 1.3E-04 | 9.1E-04 | -1.2 | 4.2E-01 | 6.8E-01 |
| AT1G24600 | AT1G24600 | hypothetical protein                                                                                      | 2.1 | 6.9E-03 | 2.4E-02 | 1.7  | 6.1E-02 | 2.3E-01 |



|           |             |                                                                                           |     |         |         |      |         |         |
|-----------|-------------|-------------------------------------------------------------------------------------------|-----|---------|---------|------|---------|---------|
| AT3G49330 | AT3G49330   | Plant invertase/pectin methylesterase inhibitor superfamily protein                       | 2.1 | 6.8E-04 | 3.5E-03 | -1.5 | 7.5E-02 | 2.6E-01 |
| AT3G09162 | AT3G09162   | hypothetical protein                                                                      | 2.1 | 7.9E-06 | 8.2E-05 | 1.6  | 2.9E-03 | 3.3E-02 |
| AT1G70170 | MMP         | matrix metalloproteinase                                                                  | 2.1 | 2.3E-04 | 1.4E-03 | 1.2  | 3.8E-01 | 6.4E-01 |
| AT5G58870 | ftsh9       | FTSH protease 9                                                                           | 2.1 | 5.1E-10 | 2.1E-08 | 1.1  | 3.9E-01 | 6.5E-01 |
| AT2G16740 | UBC29       | ubiquitin-conjugating enzyme 29                                                           | 2.1 | 9.8E-06 | 9.9E-05 | -1.1 | 6.3E-01 | 8.2E-01 |
| AT1G26560 | BGLU40      | beta glucosidase 40                                                                       | 2.1 | 1.2E-08 | 3.2E-07 | -1.2 | 1.5E-01 | 3.9E-01 |
| AT1G19700 | BEL10       | BEL1-like homeodomain 10                                                                  | 2.1 | 4.2E-14 | 5.5E-12 | -1.1 | 2.9E-01 | 5.6E-01 |
| AT1G27360 | SPL11       | squamosa promoter-like 11                                                                 | 2.1 | 6.4E-08 | 1.3E-06 | 1.1  | 2.7E-01 | 5.4E-01 |
| AT3G09220 | LAC7        | laccase 7                                                                                 | 2.1 | 6.8E-07 | 1.0E-05 | -1.2 | 1.2E-01 | 3.4E-01 |
| AT4G19460 | AT4G19460   | UDP-Glycosyltransferase superfamily protein                                               | 2.1 | 1.1E-04 | 7.6E-04 | -1.1 | 6.2E-01 | 8.2E-01 |
| AT1G79270 | ECT8        | evolutionarily conserved C-terminal region 8                                              | 2.1 | 8.6E-12 | 5.7E-10 | -1.3 | 3.9E-03 | 3.9E-02 |
| AT3G59880 | AT3G59880   | hypothetical protein                                                                      | 2.1 | 3.3E-05 | 2.8E-04 | -1.4 | 3.7E-02 | 1.7E-01 |
| AT3G27170 | CLC-B       | chloride channel B                                                                        | 2.1 | 1.2E-06 | 1.6E-05 | 1.0  | 9.2E-01 | 9.7E-01 |
| AT2G43910 | HOL1        | HARMLESS TO OZONE LAYER 1                                                                 | 2.1 | 1.7E-13 | 1.9E-11 | -1.2 | 1.8E-02 | 1.1E-01 |
| AT3G23210 | bHLH34      | basic helix-loop-helix (bHLH) DNA-binding superfamily protein                             | 2.1 | 4.5E-08 | 9.6E-07 | 1.2  | 5.9E-02 | 2.2E-01 |
| AT3G25410 | AT3G25410   | Sodium Bile acid symporter family                                                         | 2.1 | 6.4E-11 | 3.4E-09 | 1.2  | 4.7E-02 | 2.0E-01 |
| AT3G22620 | AT3G22620   | Bifunctional inhibitor/lipid-transfer protein/seed storage 2S albumin superfamily protein | 2.1 | 6.6E-06 | 7.1E-05 | -1.8 | 2.5E-04 | 6.2E-03 |
| AT1G27480 | AT1G27480   | alpha/beta-Hydrolases superfamily protein                                                 | 2.1 | 7.7E-10 | 2.9E-08 | 1.0  | 9.9E-01 | 1.0E+00 |
| AT4G19830 | AT4G19830   | FKBP-like peptidyl-prolyl cis-trans isomerase family protein                              | 2.1 | 1.8E-09 | 6.1E-08 | 1.1  | 2.5E-01 | 5.1E-01 |
| AT2G41250 | AT2G41250   | Haloacid dehalogenase-like hydrolase (HAD) superfamily protein                            | 2.1 | 1.2E-11 | 8.0E-10 | 1.4  | 1.2E-04 | 3.5E-03 |
| AT1G18810 | AT1G18810   | phytochrome kinase substrate-like protein                                                 | 2.1 | 2.3E-06 | 2.9E-05 | -1.1 | 5.7E-01 | 7.9E-01 |
| AT3G06125 | AT3G06125   |                                                                                           | 2.1 | 1.2E-08 | 3.1E-07 | -1.5 | 3.4E-04 | 7.5E-03 |
| AT1G43160 | RAP2.6      | related to AP2 6                                                                          | 2.1 | 3.0E-04 | 1.8E-03 | 1.2  | 3.5E-01 | 6.1E-01 |
| AT5G43450 | AT5G43450   | 2-oxoglutarate (2OG) and Fe(II)-dependent oxygenase superfamily protein                   | 2.1 | 1.5E-05 | 1.4E-04 | 1.0  | 9.0E-01 | 9.6E-01 |
| AT3G02140 | TMAC2       | AFP2 (ABI five-binding protein 2) family protein                                          | 2.1 | 2.1E-10 | 9.4E-09 | -1.1 | 3.7E-01 | 6.3E-01 |
| AT1G73360 | HDG11       | homeodomain GLABROUS 11                                                                   | 2.1 | 4.8E-05 | 3.8E-04 | -1.0 | 8.4E-01 | 9.4E-01 |
| AT1G09300 | AT1G09300   | Metallopeptidase M24 family protein                                                       | 2.1 | 5.4E-08 | 1.1E-06 | 1.3  | 4.4E-02 | 1.9E-01 |
| AT5G62840 | AT5G62840   | Phosphoglycerate mutase family protein                                                    | 2.1 | 1.0E-07 | 1.9E-06 | 1.3  | 2.3E-02 | 1.2E-01 |
| AT3G18400 | NAC058      | NAC domain containing protein 58                                                          | 2.1 | 9.1E-04 | 4.5E-03 | 1.0  | 9.0E-01 | 9.6E-01 |
| AT3G05932 | AT3G05932   | Natural antisense transcript overlaps with AT3G05930                                      | 2.1 | 7.5E-08 | 1.5E-06 | 1.4  | 5.4E-03 | 4.9E-02 |
| AT1G11330 | AT1G11330   | S-locus lectin protein kinase family protein                                              | 2.1 | 1.0E-06 | 1.4E-05 | 1.0  | 7.6E-01 | 9.0E-01 |
| AT3G48520 | CYP94B3     | cytochrome P450, family 94, subfamily B, polypeptide 3                                    | 2.1 | 2.0E-06 | 2.6E-05 | 1.0  | 7.3E-01 | 8.8E-01 |
| AT3G18750 | WNK6        | with no lysine (K) kinase 6                                                               | 2.1 | 4.8E-09 | 1.4E-07 | 1.1  | 1.9E-01 | 4.4E-01 |
| AT5G36120 | CCB3        | cofactor assembly, complex C (B6F)                                                        | 2.1 | 2.6E-07 | 4.4E-06 | 1.3  | 3.3E-02 | 1.6E-01 |
| AT2G23540 | AT2G23540   | GDSL-like Lipase/Acylhydrolase superfamily protein                                        | 2.1 | 1.1E-02 | 3.5E-02 | 1.4  | 2.9E-01 | 5.5E-01 |
| AT1G64780 | AMT1        |                                                                                           | 2.1 | 8.8E-07 | 1.3E-05 | -1.1 | 3.1E-01 | 5.7E-01 |
| AT4G22890 | PGR5-LIKE A | PGR5-LIKE A                                                                               | 2.1 | 2.1E-06 | 2.7E-05 | 1.3  | 3.4E-02 | 1.6E-01 |
| AT4G08555 | AT4G08555   | hypothetical protein                                                                      | 2.1 | 1.5E-02 | 4.4E-02 | -1.5 | 2.3E-01 | 4.9E-01 |
| AT3G01660 | AT3G01660   | S-adenosyl-L-methionine-dependent methyltransferases superfamily protein                  | 2.1 | 8.5E-07 | 1.2E-05 | 1.2  | 2.0E-01 | 4.6E-01 |
| AT3G15360 | TRX-M4      | thioredoxin M-type 4                                                                      | 2.1 | 6.4E-10 | 2.5E-08 | 1.4  | 5.8E-04 | 1.1E-02 |
| AT5G21430 | NdhU        | Chaperone DnaJ-domain superfamily protein                                                 | 2.1 | 3.1E-08 | 7.1E-07 | 1.0  | 7.8E-01 | 9.0E-01 |
| AT3G55040 | GSTL2       | glutathione transferase lambda 2                                                          | 2.1 | 1.0E-08 | 2.7E-07 | -1.1 | 2.6E-01 | 5.2E-01 |
| AT5G17670 | AT5G17670   | alpha/beta-Hydrolases superfamily protein                                                 | 2.1 | 9.5E-08 | 1.8E-06 | 1.5  | 7.2E-04 | 1.3E-02 |
| AT3G49668 | AT3G49668   | Natural antisense transcript overlaps with AT3G49670                                      | 2.1 | 1.1E-02 | 3.4E-02 | -1.0 | 9.6E-01 | 9.9E-01 |
| AT4G21445 | AT4G21445   | receptor-interacting protein                                                              | 2.1 | 1.0E-05 | 1.0E-04 | 1.2  | 1.5E-01 | 3.8E-01 |
| AT5G57560 | TCH4        | Xyloglucan endotransglucosylase/hydrolase family protein                                  | 2.1 | 1.6E-02 | 4.8E-02 | -2.2 | 1.0E-02 | 7.3E-02 |
| AT5G03190 | CPUORF47    | peptide upstream protein                                                                  | 2.1 | 3.8E-13 | 3.9E-11 | 1.0  | 8.2E-01 | 9.3E-01 |
| AT5G41080 | GDPD2       | PLC-like phosphodiesterases superfamily protein                                           | 2.1 | 1.7E-07 | 3.1E-06 | -1.9 | 2.0E-06 | 2.3E-04 |
| AT4G27290 | AT4G27290   | S-locus lectin protein kinase family protein                                              | 2.1 | 1.6E-04 | 1.0E-03 | 1.3  | 1.7E-01 | 4.2E-01 |
| AT1G78995 | AT1G78995   | hypothetical protein                                                                      | 2.1 | 3.0E-07 | 5.0E-06 | 1.3  | 5.1E-02 | 2.1E-01 |
| AT5G09660 | PMDH2       | peroxisomal NAD-malate dehydrogenase 2                                                    | 2.1 | 3.7E-07 | 5.9E-06 | 1.1  | 4.6E-01 | 7.1E-01 |
| AT3G52880 | MDAR1       | monodehydroascorbate reductase 1                                                          | 2.1 | 1.6E-15 | 3.3E-13 | -1.1 | 2.4E-01 | 5.1E-01 |
| AT5G46490 | AT5G46490   | Disease resistance protein (TIR-NBS-LRR class)                                            | 2.1 | 5.3E-08 | 1.1E-06 | 1.4  | 2.3E-03 | 2.8E-02 |
| AT2G31945 | AT2G31945   | transmembrane protein                                                                     | 2.1 | 2.2E-04 | 1.4E-03 | -1.1 | 5.0E-01 | 7.4E-01 |
| AT3G23580 | RNR2A       | ribonucleotide reductase 2A                                                               | 2.1 | 4.3E-12 | 3.2E-10 | 1.2  | 6.0E-03 | 5.3E-02 |
| AT4G03020 | AT4G03020   | transducin family protein / WD-40 repeat family protein                                   | 2.1 | 3.9E-15 | 6.9E-13 | -1.1 | 2.0E-01 | 4.5E-01 |
| AT1G43560 | ty2         | thioredoxin Y2                                                                            | 2.1 | 2.9E-07 | 4.9E-06 | 1.1  | 2.9E-01 | 5.6E-01 |
| AT1G23880 | AT1G23880   | NHL domain-containing protein                                                             | 2.1 | 3.5E-07 | 5.8E-06 | -1.1 | 5.6E-01 | 7.8E-01 |
| AT3G11090 | LBD21       | LOB domain-containing protein 21                                                          | 2.1 | 2.3E-06 | 2.9E-05 | 1.1  | 3.8E-01 | 6.4E-01 |
| AT1G64680 | AT1G64680   | beta-carotene isomerase D27                                                               | 2.1 | 3.1E-09 | 9.8E-08 | 1.1  | 5.2E-01 | 7.5E-01 |
| AT5G25890 | IAA28       | indole-3-acetic acid inducible 28                                                         | 2.1 | 1.7E-09 | 5.8E-08 | 1.2  | 8.3E-02 | 2.8E-01 |
| AT5G17310 | UGP2        | UDP-glucose pyrophosphorylase 2                                                           | 2.1 | 2.2E-10 | 1.0E-08 | -1.1 | 3.5E-01 | 6.1E-01 |
| AT1G77330 | AT1G77330   | 2-oxoglutarate (2OG) and Fe(II)-dependent oxygenase superfamily protein                   | 2.1 | 1.3E-05 | 1.2E-04 | 1.0  | 8.4E-01 | 9.4E-01 |
| AT4G01490 | AT4G01490   | transposable_element_gene                                                                 | 2.1 | 1.4E-02 | 4.4E-02 | 1.4  | 2.6E-01 | 5.2E-01 |
| AT2G23672 | AT2G23672   | Natural antisense transcript overlaps with AT2G23670                                      | 2.1 | 1.9E-05 | 1.7E-04 | 1.1  | 3.7E-01 | 6.3E-01 |
| AT3G15520 | AT3G15520   | Cyclophilin-like peptidyl-prolyl cis-trans isomerase family protein                       | 2.1 | 5.4E-07 | 8.2E-06 | 1.4  | 5.9E-03 | 5.2E-02 |
| AT1G22630 | AT1G22630   | SSUH2-like protein                                                                        | 2.1 | 7.7E-10 | 2.9E-08 | 1.3  | 6.9E-03 | 5.8E-02 |
| AT3G44020 | AT3G44020   | thylakoid lumenal P17.1 protein                                                           | 2.1 | 4.6E-08 | 9.9E-07 | -1.0 | 9.1E-01 | 9.7E-01 |

|           |                  |                                                                          |     |         |         |      |         |         |
|-----------|------------------|--------------------------------------------------------------------------|-----|---------|---------|------|---------|---------|
| AT4G24930 | <i>AT4G24930</i> | thylakoid lumenal 17.9 kDa protein, chloroplast                          | 2.1 | 4.0E-08 | 8.7E-07 | 1.2  | 8.7E-02 | 2.8E-01 |
| AT3G05935 | <i>AT3G05935</i> | hypothetical protein                                                     | 2.1 | 1.9E-11 | 1.2E-09 | 1.0  | 9.0E-01 | 9.6E-01 |
| AT1G30680 | <i>AT1G30680</i> | toprim domain-containing protein                                         | 2.1 | 1.1E-09 | 4.1E-08 | 1.4  | 1.1E-03 | 1.7E-02 |
| AT3G50270 | <i>AT3G50270</i> | HXXXD-type acyl-transferase family protein                               | 2.1 | 1.9E-07 | 3.3E-06 | 1.9  | 2.9E-06 | 2.9E-04 |
| AT3G03770 | <i>AT3G03770</i> | Leucine-rich repeat protein kinase family protein                        | 2.1 | 1.5E-04 | 1.0E-03 | 1.2  | 2.6E-01 | 5.2E-01 |
| AT4G13550 | <i>AT4G13550</i> | putative triglyceride lipase                                             | 2.1 | 8.6E-10 | 3.2E-08 | 1.0  | 7.8E-01 | 9.1E-01 |
| AT4G23260 | <i>CRK18</i>     | cysteine-rich RLK (RECEPTOR-like protein kinase) 18                      | 2.1 | 1.1E-04 | 7.8E-04 | 1.9  | 4.4E-04 | 9.1E-03 |
| AT4G27940 | <i>MTM1</i>      | manganese tracking factor for mitochondrial SOD2                         | 2.1 | 7.6E-08 | 1.5E-06 | 1.1  | 4.6E-01 | 7.1E-01 |
| AT2G24120 | <i>SCA3</i>      | DNA/RNA polymerases superfamily protein                                  | 2.1 | 6.5E-09 | 1.9E-07 | 1.9  | 1.4E-07 | 3.4E-05 |
| AT4G04020 | <i>FIB</i>       | fibrillin                                                                | 2.1 | 3.9E-08 | 8.5E-07 | -1.2 | 1.3E-01 | 3.6E-01 |
| AT2G29290 | <i>AT2G29290</i> | NAD(P)-binding Rossmann-fold superfamily protein                         | 2.1 | 4.7E-05 | 3.7E-04 | -1.0 | 9.2E-01 | 9.7E-01 |
| AT5G34850 | <i>PAP26</i>     | purple acid phosphatase 26                                               | 2.1 | 1.5E-12 | 1.3E-10 | -1.2 | 2.9E-02 | 1.4E-01 |
| AT5G10730 | <i>AT5G10730</i> | NAD(P)-binding Rossmann-fold superfamily protein                         | 2.1 | 2.4E-12 | 1.9E-10 | -1.1 | 7.2E-02 | 2.5E-01 |
| AT3G14420 | <i>GOX1</i>      | Aldolase-type TIM barrel family protein                                  | 2.1 | 1.7E-06 | 2.3E-05 | 1.1  | 3.5E-01 | 6.2E-01 |
| AT1G23390 | <i>AT1G23390</i> | Kelch repeat-containing F-box family protein                             | 2.1 | 1.6E-08 | 4.0E-07 | -1.0 | 8.9E-01 | 9.6E-01 |
| AT3G12930 | <i>AT3G12930</i> | Lojap-related protein                                                    | 2.1 | 1.5E-08 | 3.7E-07 | 1.4  | 1.5E-03 | 2.1E-02 |
| AT1G54500 | <i>AT1G54500</i> | Rubredoxin-like superfamily protein                                      | 2.1 | 8.5E-08 | 1.7E-06 | 1.3  | 3.1E-02 | 1.5E-01 |
| AT5G01840 | <i>OFPI</i>      | ovate family protein 1                                                   | 2.1 | 5.3E-06 | 5.9E-05 | 1.3  | 3.6E-02 | 1.6E-01 |
| AT2G43140 | <i>AT2G43140</i> | basic helix-loop-helix (bHLH) DNA-binding superfamily protein            | 2.1 | 3.5E-03 | 1.4E-02 | 1.3  | 2.3E-01 | 5.0E-01 |
| AT5G41590 | <i>AT5G41590</i> | LURP-one-like protein (DUF567)                                           | 2.1 | 3.7E-03 | 1.4E-02 | -1.1 | 7.3E-01 | 8.8E-01 |
| AT4G37925 | <i>NdhM</i>      | subunit NDH-M of NAD(P)H:plastoquinone dehydrogenase complex             | 2.1 | 3.2E-07 | 5.3E-06 | 1.0  | 7.1E-01 | 8.7E-01 |
| AT5G28750 | <i>AT5G28750</i> | Bacterial sec-independent translocation protein mttA/Hcf106              | 2.1 | 4.1E-10 | 1.7E-08 | 1.2  | 4.8E-02 | 2.0E-01 |
| AT5G49910 | <i>cpHsc70-2</i> | chloroplast heat shock protein 70-2                                      | 2.1 | 7.2E-11 | 3.7E-09 | 1.2  | 4.8E-02 | 2.0E-01 |
| AT1G30360 | <i>ERD4</i>      | Early-responsive to dehydration stress protein                           | 2.1 | 3.8E-09 | 1.2E-07 | -1.2 | 9.0E-02 | 2.9E-01 |
| AT2G01850 | <i>EXGT-A3</i>   | endoxyloglucan transferase A3                                            | 2.1 | 6.4E-13 | 6.1E-11 | 1.1  | 2.1E-01 | 4.7E-01 |
| AT5G57180 | <i>CIA2</i>      | chloroplast import apparatus 2                                           | 2.0 | 1.3E-08 | 3.4E-07 | 1.2  | 7.3E-02 | 2.5E-01 |
| AT3G03990 | <i>AT3G03990</i> | alpha/beta-Hydrolases superfamily protein                                | 2.0 | 1.8E-14 | 2.5E-12 | 1.0  | 6.0E-01 | 8.0E-01 |
| AT5G59720 | <i>HSP18.2</i>   | heat shock protein 18.2                                                  | 2.0 | 6.7E-05 | 5.1E-04 | -1.0 | 9.5E-01 | 9.9E-01 |
| AT4G20360 | <i>RABE1b</i>    | RAB GTPase homolog E1B                                                   | 2.0 | 3.7E-07 | 5.9E-06 | 1.4  | 1.1E-02 | 7.8E-02 |
| AT4G17360 | <i>AT4G17360</i> | Formyl transferase                                                       | 2.0 | 5.0E-06 | 5.6E-05 | -1.2 | 3.1E-01 | 5.7E-01 |
| AT1G69870 | <i>NRT1.7</i>    | nitrate transporter 1.7                                                  | 2.0 | 2.5E-05 | 2.2E-04 | -1.4 | 4.4E-02 | 1.9E-01 |
| AT2G42130 | <i>AT2G42130</i> | Plastid-lipid associated protein PAP / fibrillin family protein          | 2.0 | 5.4E-10 | 2.1E-08 | 1.3  | 9.0E-03 | 6.9E-02 |
| AT5G28500 | <i>AT5G28500</i> | rubisco accumulation factor-like protein                                 | 2.0 | 5.2E-08 | 1.1E-06 | 1.4  | 9.5E-04 | 1.5E-02 |
| AT1G03905 | <i>ABC119</i>    | P-loop containing nucleoside triphosphate hydrolases superfamily protein | 2.0 | 5.1E-08 | 1.1E-06 | 1.0  | 6.6E-01 | 8.4E-01 |
| AT1G74650 | <i>MYB31</i>     | myb domain protein 31                                                    | 2.0 | 8.1E-04 | 4.1E-03 | -1.9 | 2.9E-03 | 3.3E-02 |
| AT3G54990 | <i>SMZ</i>       | Integrase-type DNA-binding superfamily protein                           | 2.0 | 6.4E-10 | 2.5E-08 | -1.2 | 1.4E-02 | 9.1E-02 |
| AT4G26860 | <i>AT4G26860</i> | Putative pyridoxal phosphate-dependent enzyme, YBL036C type              | 2.0 | 1.6E-11 | 1.0E-09 | -1.2 | 3.4E-02 | 1.6E-01 |
| AT5G54770 | <i>THI1</i>      | thiazole biosynthetic enzyme, chloroplast (ARA6) (THI1) (THI4)           | 2.0 | 2.5E-06 | 3.2E-05 | -1.1 | 6.9E-01 | 8.6E-01 |
| AT4G21860 | <i>MSRB2</i>     | methionine sulfoxide reductase B 2                                       | 2.0 | 2.7E-13 | 2.9E-11 | 1.1  | 2.2E-01 | 4.8E-01 |
| AT2G22360 | <i>AT2G22360</i> | DNAJ heat shock family protein                                           | 2.0 | 3.1E-11 | 1.8E-09 | 1.3  | 4.1E-03 | 4.1E-02 |
| AT5G02940 | <i>AT5G02940</i> | ion channel POLLUX-like protein, putative                                | 2.0 | 2.5E-07 | 4.3E-06 | 1.1  | 3.6E-01 | 6.2E-01 |
| AT3G52605 | <i>AT3G52605</i> | Natural antisense transcript overlaps with AT3G52610                     | 2.0 | 1.1E-05 | 1.1E-04 | 1.3  | 4.6E-02 | 1.9E-01 |
| AT1G21110 | <i>IGMT3</i>     | O-methyltransferase family protein                                       | 2.0 | 1.9E-04 | 1.2E-03 | 1.5  | 1.6E-02 | 9.9E-02 |
| AT5G49970 | <i>PPOX</i>      | pyridoxin (pyridoxamine) 5'-phosphate oxidase                            | 2.0 | 1.8E-12 | 1.5E-10 | -1.1 | 3.8E-01 | 6.4E-01 |
| AT1G19150 | <i>Lhca6</i>     | PSI type II chlorophyll a/b-binding protein                              | 2.0 | 8.0E-07 | 1.2E-05 | 1.4  | 4.8E-03 | 4.6E-02 |
| AT3G53830 | <i>AT3G53830</i> | Regulator of chromosome condensation (RCC1) family protein               | 2.0 | 5.9E-05 | 4.5E-04 | 1.2  | 1.8E-01 | 4.3E-01 |
| AT3G62030 | <i>ROC4</i>      | rotamase CYP 4                                                           | 2.0 | 6.9E-05 | 5.2E-04 | 1.4  | 4.0E-02 | 1.8E-01 |
| AT3G49760 | <i>bZIP5</i>     | basic leucine-zipper 5                                                   | 2.0 | 2.1E-03 | 8.9E-03 | 1.0  | 9.7E-01 | 9.9E-01 |
| AT1G26600 | <i>CLE9</i>      | CLAVATA3/ESR-RELATED 9                                                   | 2.0 | 3.6E-03 | 1.4E-02 | 1.1  | 6.2E-01 | 8.2E-01 |
| AT4G39970 | <i>AT4G39970</i> | Haloacid dehalogenase-like hydrolase (HAD) superfamily protein           | 2.0 | 2.7E-06 | 3.3E-05 | 1.1  | 3.1E-01 | 5.7E-01 |
| AT3G27050 | <i>AT3G27050</i> | plant/protein                                                            | 2.0 | 7.6E-08 | 1.5E-06 | 1.2  | 5.2E-02 | 2.1E-01 |
| AT3G43600 | <i>AAO2</i>      | aldehyde oxidase 2                                                       | 2.0 | 2.3E-11 | 1.4E-09 | -1.0 | 6.4E-01 | 8.3E-01 |
| AT5G44005 | <i>AT5G44005</i> | hypothetical protein                                                     | 2.0 | 7.7E-05 | 5.7E-04 | -1.2 | 2.2E-01 | 4.8E-01 |
| AT5G49030 | <i>OVA2</i>      | tRNA synthetase class I (I, L, M and V) family                           | 2.0 | 1.1E-07 | 2.1E-06 | 1.3  | 8.4E-03 | 6.6E-02 |
| AT1G11860 | <i>AT1G11860</i> | Glycine cleavage T-protein family                                        | 2.0 | 7.7E-08 | 1.5E-06 | 1.2  | 6.1E-02 | 2.3E-01 |
| AT1G05540 | <i>AT1G05540</i> | hypothetical protein (DUF295)                                            | 2.0 | 1.6E-03 | 7.1E-03 | -1.6 | 4.5E-02 | 1.9E-01 |
| AT1G62960 | <i>ACS10</i>     | ACC synthase 10                                                          | 2.0 | 2.9E-10 | 1.3E-08 | 1.3  | 1.2E-03 | 1.8E-02 |
| AT3G11945 | <i>HST</i>       | homogentisate prenyltransferase                                          | 2.0 | 1.1E-05 | 1.1E-04 | 1.3  | 9.6E-02 | 3.0E-01 |
| AT5G09590 | <i>MTHSC70-2</i> | mitochondrial HSO70 2                                                    | 2.0 | 8.9E-09 | 2.4E-07 | 1.1  | 4.7E-01 | 7.1E-01 |
| AT2G16500 | <i>ADC1</i>      | arginine decarboxylase 1                                                 | 2.0 | 8.2E-09 | 2.2E-07 | 1.1  | 3.6E-01 | 6.2E-01 |
| AT1G01790 | <i>KEA1</i>      | K efflux antiporter 1                                                    | 2.0 | 9.1E-07 | 1.3E-05 | -1.1 | 2.5E-01 | 5.2E-01 |
| AT1G48100 | <i>AT1G48100</i> | Pectin lyase-like superfamily protein                                    | 2.0 | 9.5E-07 | 1.3E-05 | -1.5 | 4.4E-03 | 4.3E-02 |
| AT4G03280 | <i>PETC</i>      | photosynthetic electron transfer C                                       | 2.0 | 8.6E-08 | 1.7E-06 | 1.4  | 3.5E-03 | 3.7E-02 |
| AT1G45191 | <i>BGLU1</i>     | Glycosyl hydrolase superfamily protein                                   | 2.0 | 5.8E-04 | 3.1E-03 | -1.1 | 6.8E-01 | 8.5E-01 |
| AT5G47610 | <i>AT5G47610</i> | RING/U-box superfamily protein                                           | 2.0 | 8.0E-07 | 1.2E-05 | -1.2 | 7.5E-02 | 2.6E-01 |
| AT1G28815 | <i>AT1G28815</i> | hypothetical protein                                                     | 2.0 | 6.6E-04 | 3.5E-03 | -1.4 | 1.0E-01 | 3.1E-01 |
| AT1G72620 | <i>AT1G72620</i> | alpha/beta-Hydrolases superfamily protein                                | 2.0 | 7.8E-03 | 2.7E-02 | 1.1  | 8.4E-01 | 9.4E-01 |
| AT3G12345 | <i>AT3G12345</i> | FKBP-type peptidyl-prolyl cis-trans isomerase                            | 2.0 | 2.2E-08 | 5.1E-07 | 1.4  | 1.2E-03 | 1.8E-02 |
| AT4G31390 | <i>ACDO1</i>     | Protein kinase superfamily protein                                       | 2.0 | 9.4E-08 | 1.8E-06 | -1.1 | 5.0E-01 | 7.3E-01 |
| AT2G30100 | <i>AT2G30100</i> | pentatricopeptide (PPR) repeat-containing protein                        | 2.0 | 3.0E-11 | 1.7E-09 | 1.0  | 7.3E-01 | 8.8E-01 |
| AT3G01180 | <i>SS2</i>       | starch synthase 2                                                        | 2.0 | 3.7E-11 | 2.1E-09 | 1.1  | 4.1E-01 | 6.7E-01 |
| AT3G52370 | <i>FLA15</i>     | FASCICLIN-like arabinogalactan protein 15                                | 2.0 | 5.6E-05 | 4.3E-04 | -1.6 | 2.9E-03 | 3.3E-02 |

|           |           |                                                                          |     |         |         |      |         |         |
|-----------|-----------|--------------------------------------------------------------------------|-----|---------|---------|------|---------|---------|
| AT5G44490 | AT5G44490 | FBD, F-box, Skp2-like and Leucine Rich Repeat domains containing protein | 2.0 | 6.0E-04 | 3.2E-03 | 1.2  | 2.8E-01 | 5.5E-01 |
| AT1G43675 | AT1G43675 | transposable_element_gene                                                | 2.0 | 9.0E-03 | 3.0E-02 | 1.1  | 8.1E-01 | 9.2E-01 |
| AT5G41315 | GL3       | basic helix-loop-helix (bHLH) DNA-binding superfamily protein            | 2.0 | 1.8E-03 | 8.0E-03 | -1.1 | 7.1E-01 | 8.7E-01 |
| AT4G17810 | AT4G17810 | C2H2 and C2HC zinc fingers superfamily protein                           | 2.0 | 3.8E-07 | 6.0E-06 | 1.6  | 9.1E-05 | 3.0E-03 |
| AT2G17695 | AT2G17695 | outer envelope protein                                                   | 2.0 | 7.5E-09 | 2.1E-07 | 1.1  | 3.1E-01 | 5.7E-01 |
| AT4G27830 | BGLU10    | beta glucosidase 10                                                      | 2.0 | 1.2E-07 | 2.3E-06 | 1.0  | 6.6E-01 | 8.4E-01 |
| AT1G42550 | PMI1      | plastid movement impaired1                                               | 2.0 | 8.0E-09 | 2.2E-07 | 1.0  | 8.1E-01 | 9.3E-01 |
| AT1G79470 | AT1G79470 | Aldolase-type TIM barrel family protein                                  | 2.0 | 1.4E-05 | 1.3E-04 | 1.2  | 1.8E-01 | 4.3E-01 |
| AT5G10150 | AT5G10150 | UPSTREAM OF FLC protein (DUF966)                                         | 2.0 | 1.1E-06 | 1.6E-05 | 1.1  | 2.5E-01 | 5.1E-01 |
| AT3G56160 | AT3G56160 | Sodium Bile acid symporter family                                        | 2.0 | 5.1E-07 | 7.9E-06 | 1.4  | 7.2E-03 | 6.0E-02 |
| AT1G16320 | AT1G16320 | plant/protein (DUF2358)                                                  | 2.0 | 3.8E-08 | 8.4E-07 | 1.0  | 7.5E-01 | 8.9E-01 |
| AT1G04350 | AT1G04350 | 2-oxoglutarate (2OG) and Fe(II)-dependent oxygenase superfamily protein  | 2.0 | 9.6E-08 | 1.8E-06 | 1.1  | 2.6E-01 | 5.3E-01 |
| AT1G51805 | AT1G51805 | Leucine-rich repeat protein kinase family protein                        | 2.0 | 6.0E-06 | 6.5E-05 | -1.2 | 1.0E-01 | 3.1E-01 |
| AT5G59050 | AT5G59050 | G patch domain protein                                                   | 2.0 | 7.4E-06 | 7.8E-05 | -1.3 | 1.0E-01 | 3.1E-01 |

| pif45 /Col WL Up |           |                                                                                           | Col UV/WL    |         |                 | pif45 /Col WL   |         |                 |
|------------------|-----------|-------------------------------------------------------------------------------------------|--------------|---------|-----------------|-----------------|---------|-----------------|
| AGI              | gene      | description                                                                               | Col UV/WL_FC | pvalue  | pvalue_with_FDR | pif45/Col_WL_FC | pvalue  | pvalue_with_FDR |
| AT4G08093        | AT4G08093 | pseudogene of dihydroorotate dehydrogenase                                                | -1.2         | 6.2E-01 | 7.4E-01         | 27.6            | 1.4E-15 | 1.5E-11         |
| AT1G33960        | AIG1      | P-loop containing nucleoside triphosphate hydrolases superfamily protein                  | -3.8         | 3.7E-01 | 5.2E-01         | 20.0            | 4.0E-04 | 8.5E-03         |
| AT3G60170        | AT3G60170 | transposable_element_gene                                                                 | -6.6         | 1.6E-01 | 2.9E-01         | 17.8            | 2.8E-05 | 1.4E-03         |
| AT2G11780        | AT2G11780 | transposable_element_gene                                                                 | 1.4          | 7.5E-01 | 8.4E-01         | 12.8            | 5.5E-04 | 1.1E-02         |
| AT4G32540        | YUC1      | Flavin-binding monooxygenase family protein                                               | 4.0          | 3.0E-02 | 7.8E-02         | 7.2             | 1.2E-03 | 1.8E-02         |
| AT1G13400        | NUB       | C2H2 and C2HC zinc fingers superfamily protein                                            | 2.8          | 9.3E-02 | 1.9E-01         | 6.0             | 1.8E-03 | 2.4E-02         |
| AT1G68480        | JAG       | C2H2 and C2HC zinc fingers superfamily protein                                            | 2.1          | 1.2E-01 | 2.4E-01         | 5.5             | 2.5E-04 | 6.1E-03         |
| AT4G09430        | AT4G09430 | disease resistance protein (TIR-NBS-LRR class)                                            | 1.2          | 7.6E-01 | 8.5E-01         | 5.3             | 2.3E-04 | 5.8E-03         |
| AT5G07040        | AT5G07040 | RING/U-box superfamily protein                                                            | -1.0         | 9.8E-01 | 9.9E-01         | 5.2             | 5.5E-03 | 5.0E-02         |
| AT5G35935        | AT5G35935 | transposable_element_gene                                                                 | -1.7         | 4.1E-02 | 9.9E-02         | 5.1             | 6.7E-08 | 2.2E-05         |
| AT5G51800        | AT5G51800 | Protein kinase superfamily protein                                                        | 2.3          | 9.6E-02 | 1.9E-01         | 4.9             | 7.0E-04 | 1.2E-02         |
| AT5G61610        | AT5G61610 | Oleosin family protein                                                                    | 1.7          | 3.8E-01 | 5.3E-01         | 4.9             | 2.9E-03 | 3.2E-02         |
| AT3G28770        | AT3G28770 | transmembrane protein, putative (DUF1216)                                                 | 1.5          | 4.4E-01 | 5.9E-01         | 4.8             | 8.9E-04 | 1.5E-02         |
| AT5G20240        | PI        | K-box region and MADS-box transcription factor family protein                             | 2.1          | 3.0E-02 | 7.9E-02         | 4.6             | 1.4E-05 | 8.7E-04         |
| AT4G02960        | RE2       | transposable_element_gene                                                                 | 1.1          | 7.7E-01 | 8.5E-01         | 4.4             | 3.8E-04 | 8.2E-03         |
| AT3G10780        | AT3G10780 | emp24/gp25L/p24 family/GOLD family protein                                                | -1.9         | 3.9E-01 | 5.4E-01         | 4.4             | 3.9E-03 | 4.0E-02         |
| AT2G04135        | AT2G04135 | transposable_element_gene                                                                 | -1.0         | 9.6E-01 | 9.8E-01         | 4.0             | 5.1E-03 | 4.7E-02         |
| AT5G55450        | AT5G55450 | Bifunctional inhibitor/lipid-transfer protein/seed storage 2S albumin superfamily protein | -1.2         | 6.1E-01 | 7.4E-01         | 4.0             | 4.7E-04 | 9.5E-03         |
| AT5G11412        | AT5G11412 | RNA-binding (RRM/RBD/RNP motifs) family protein                                           | -4.1         | 2.9E-02 | 7.5E-02         | 4.0             | 7.6E-04 | 1.3E-02         |
| AT4G29150        | IQD25     | IQ-domain 25                                                                              | 2.4          | 6.7E-02 | 1.5E-01         | 3.9             | 3.7E-03 | 3.8E-02         |
| AT2G25470        | RLP21     | receptor like protein 21                                                                  | 2.5          | 4.0E-02 | 9.9E-02         | 3.8             | 2.3E-03 | 2.8E-02         |
| AT4G23200        | CRK12     | cysteine-rich RLK (RECEPTOR-like protein kinase) 12                                       | 2.0          | 6.0E-02 | 1.3E-01         | 3.8             | 3.2E-04 | 7.2E-03         |
| AT4G34950        | AT4G34950 | Major facilitator superfamily protein                                                     | -1.1         | 5.3E-01 | 6.7E-01         | 3.8             | 3.2E-08 | 1.4E-05         |
| AT5G05900        | AT5G05900 | UDP-Glycosyltransferase superfamily protein                                               | 1.2          | 6.6E-01 | 7.7E-01         | 3.3             | 3.3E-03 | 3.6E-02         |
| AT1G02065        | SPL8      | squamosa promoter binding protein-like 8                                                  | 2.1          | 2.3E-02 | 6.4E-02         | 3.2             | 2.7E-04 | 6.5E-03         |
| AT2G02010        | GAD4      | glutamate decarboxylase 4                                                                 | 1.2          | 5.4E-01 | 6.8E-01         | 3.2             | 4.6E-05 | 1.9E-03         |
| AT1G16510        | AT1G16510 | SAUR-like auxin-responsive protein family                                                 | 1.4          | 2.2E-01 | 3.7E-01         | 3.1             | 2.6E-04 | 6.3E-03         |
| AT3G08770        | LTP6      | lipid transfer protein 6                                                                  | 1.6          | 3.1E-02 | 8.0E-02         | 3.1             | 8.7E-06 | 6.3E-04         |
| AT2G35310        | AT2G35310 | Transcriptional factor B3 family protein                                                  | 1.2          | 7.1E-01 | 8.1E-01         | 3.0             | 2.0E-03 | 2.5E-02         |
| AT2G23050        | NPY4      | Phototropic-responsive NPH3 family protein                                                | -1.2         | 5.9E-01 | 7.2E-01         | 3.0             | 2.3E-03 | 2.8E-02         |
| AT4G22517        | AT4G22517 | Bifunctional inhibitor/lipid-transfer protein/seed storage 2S albumin superfamily protein | 1.9          | 6.7E-02 | 1.5E-01         | 2.9             | 3.3E-03 | 3.6E-02         |
| AT5G11320        | YUC4      | Flavin-binding monooxygenase family protein                                               | 1.4          | 2.6E-01 | 4.0E-01         | 2.9             | 4.1E-04 | 8.6E-03         |
| AT2G16230        | AT2G16230 | O-Glycosyl hydrolases family 17 protein                                                   | -2.2         | 1.0E-01 | 2.0E-01         | 2.9             | 5.6E-03 | 5.0E-02         |
| AT4G15690        | AT4G15690 | Thioredoxin superfamily protein                                                           | 1.6          | 1.6E-01 | 2.9E-01         | 2.9             | 1.5E-03 | 2.1E-02         |
| AT1G62500        | AT1G62500 | Bifunctional inhibitor/lipid-transfer protein/seed storage 2S albumin superfamily protein | 1.2          | 4.7E-01 | 6.2E-01         | 2.8             | 2.8E-04 | 6.6E-03         |
| AT1G26680        | AT1G26680 | transcriptional factor B3 family protein                                                  | -1.9         | 9.1E-02 | 1.9E-01         | 2.8             | 2.5E-03 | 3.0E-02         |
| AT5G35480        | AT5G35480 | hypothetical protein                                                                      | 1.7          | 1.3E-01 | 2.5E-01         | 2.8             | 4.3E-03 | 4.2E-02         |
| AT3G13400        | sk513     | SKU5 similar 13                                                                           | 1.7          | 2.8E-02 | 7.5E-02         | 2.7             | 6.4E-05 | 2.4E-03         |
| AT4G23590        | AT4G23590 | Tyrosine transaminase family protein                                                      | -2.2         | 2.5E-02 | 6.8E-02         | 2.7             | 1.1E-03 | 1.7E-02         |
| AT1G56150        | AT1G56150 | SAUR-like auxin-responsive protein family                                                 | 1.1          | 8.2E-01 | 8.9E-01         | 2.7             | 2.1E-05 | 1.1E-03         |
| AT4G34400        | AT4G34400 | AP2/B3-like transcriptional factor family protein                                         | 1.8          | 9.9E-02 | 2.0E-01         | 2.7             | 4.9E-03 | 4.6E-02         |
| AT3G54160        | AT3G54160 | RNI-like superfamily protein                                                              | 1.4          | 3.9E-01 | 5.4E-01         | 2.7             | 3.6E-03 | 3.8E-02         |
| AT1G28360        | ERF12     | ERF domain protein 12                                                                     | 1.3          | 3.1E-01 | 4.6E-01         | 2.7             | 7.2E-04 | 1.3E-02         |
| AT4G22485        | AT4G22485 | Bifunctional inhibitor/lipid-transfer protein/seed storage 2S albumin superfamily protein | 1.8          | 8.0E-02 | 1.7E-01         | 2.7             | 4.5E-03 | 4.4E-02         |
| AT5G53950        | CUC2      | NAC (No Apical Meristem) domain transcriptional regulator superfamily protein             | 1.4          | 3.4E-01 | 4.9E-01         | 2.6             | 1.8E-03 | 2.3E-02         |
| AT1G73620        | AT1G73620 | Pathogenesis-related thaumatin superfamily                                                | -1.9         | 7.0E-02 | 1.5E-01         | 2.6             | 2.3E-03 | 2.8E-02         |
| AT5G23940        | PEL3      | HXXXD-type acyl-transferase family protein                                                | 2.0          | 2.6E-04 | 1.6E-03         | 2.6             | 1.2E-06 | 1.6E-04         |
| AT1G10000        | AT1G10000 | Ribonuclease H-like superfamily protein                                                   | 1.6          | 1.4E-01 | 2.5E-01         | 2.6             | 4.3E-03 | 4.2E-02         |
| AT3G06020        | FAF4      | FANTASTIC four-like protein (DUF3049)                                                     | 1.2          | 4.8E-01 | 6.2E-01         | 2.6             | 1.4E-04 | 4.1E-03         |
| AT3G14530        | AT3G14530 | Terpenoid synthases superfamily protein                                                   | -1.5         | 2.3E-01 | 3.7E-01         | 2.5             | 4.2E-03 | 4.2E-02         |
| AT1G75430        | BLH11     | BEL1-like homeodomain 11                                                                  | 1.2          | 5.1E-01 | 6.5E-01         | 2.5             | 3.1E-03 | 3.4E-02         |
| AT5G18600        | AT5G18600 | Thioredoxin superfamily protein                                                           | 1.2          | 3.6E-01 | 5.2E-01         | 2.5             | 3.5E-04 | 7.7E-03         |
| AT5G48940        | AT5G48940 | Leucine-rich repeat transmembrane protein kinase family protein                           | -1.5         | 2.4E-01 | 3.9E-01         | 2.5             | 3.1E-03 | 3.4E-02         |
| AT1G64920        | AT1G64920 | UDP-Glycosyltransferase superfamily protein                                               | -1.5         | 1.4E-01 | 2.6E-01         | 2.5             | 1.0E-04 | 3.2E-03         |
| AT5G25980        | TGG2      | glucoside glucosyltransferase 2                                                           | 1.1          | 5.4E-01 | 6.7E-01         | 2.5             | 2.0E-05 | 1.1E-03         |

|           |                  |                                                                                      |      |         |         |     |         |         |
|-----------|------------------|--------------------------------------------------------------------------------------|------|---------|---------|-----|---------|---------|
| AT1G05280 | <i>AT1G05280</i> | ERV-F (C)1 provirus ancestral Env polyprotein, putative (DUF604)                     | -1.4 | 3.9E-01 | 5.4E-01 | 2.5 | 4.5E-03 | 4.4E-02 |
| AT2G14820 | <i>NPY2</i>      | Phototropic-responsive NPH3 family protein                                           | 1.0  | 8.9E-01 | 9.4E-01 | 2.5 | 2.2E-03 | 2.7E-02 |
| AT4G23750 | <i>CRF2</i>      | cytokinin response factor 2                                                          | 1.0  | 9.6E-01 | 9.8E-01 | 2.4 | 3.6E-07 | 6.4E-05 |
| AT1G66270 | <i>BGLU21</i>    | Glycosyl hydrolase superfamily protein                                               | -2.2 | 5.9E-03 | 2.1E-02 | 2.4 | 1.6E-03 | 2.1E-02 |
| AT4G30130 | <i>AT4G30130</i> | DUF630 family protein (DUF630 and DUF632)                                            | 1.3  | 3.2E-01 | 4.7E-01 | 2.4 | 7.0E-04 | 1.2E-02 |
| AT1G78750 | <i>AT1G78750</i> | F-box/RNI-like superfamily protein                                                   | 1.5  | 5.3E-02 | 1.2E-01 | 2.4 | 7.1E-05 | 2.6E-03 |
| AT1G60590 | <i>AT1G60590</i> | Pectin lyase-like superfamily protein                                                | 4.8  | 2.8E-08 | 6.5E-07 | 2.4 | 4.0E-04 | 8.5E-03 |
| AT1G74890 | <i>ARR15</i>     | response regulator 15                                                                | -1.0 | 8.9E-01 | 9.4E-01 | 2.4 | 2.5E-05 | 1.3E-03 |
| AT1G03010 | <i>AT1G03010</i> | Phototropic-responsive NPH3 family protein                                           | 1.8  | 3.7E-03 | 1.4E-02 | 2.4 | 4.1E-05 | 1.7E-03 |
| AT2G36770 | <i>AT2G36770</i> | UDP-Glycosyltransferase superfamily protein                                          | 1.4  | 2.3E-01 | 3.7E-01 | 2.4 | 3.4E-03 | 3.6E-02 |
| AT1G53160 | <i>SPL4</i>      | squamosa promoter binding protein-like 4                                             | -1.2 | 4.6E-01 | 6.1E-01 | 2.3 | 1.4E-03 | 2.0E-02 |
| AT2G24700 | <i>AT2G24700</i> | Transcriptional factor B3 family protein                                             | 1.0  | 8.3E-01 | 9.0E-01 | 2.3 | 2.0E-04 | 5.2E-03 |
| AT2G26220 | <i>AT2G26220</i> | pseudogene of Polynucleotidyl transferase%2C ribonuclease H-like superfamily protein | -1.3 | 2.6E-01 | 4.0E-01 | 2.3 | 6.0E-04 | 1.1E-02 |
| AT5G52050 | <i>AT5G52050</i> | MATE efflux family protein                                                           | -2.2 | 5.5E-03 | 2.0E-02 | 2.3 | 8.2E-04 | 1.4E-02 |
| AT1G11070 | <i>AT1G11070</i> | hydroxyproline-rich glycoprotein family protein                                      | -1.9 | 3.9E-02 | 9.6E-02 | 2.3 | 1.5E-03 | 2.1E-02 |
| AT2G04450 | <i>NUDT6</i>     | nudix hydrolase homolog 6                                                            | -1.6 | 1.7E-01 | 3.0E-01 | 2.3 | 4.6E-03 | 4.4E-02 |
| AT5G46500 | <i>AT5G46500</i> | protein VARIATION IN COMPOUND TRIGGERED ROOT growth protein                          | 1.3  | 3.4E-01 | 4.9E-01 | 2.3 | 4.5E-04 | 9.2E-03 |
| AT2G26211 | <i>MIR825A</i>   |                                                                                      | -1.3 | 4.6E-01 | 6.1E-01 | 2.3 | 5.3E-03 | 4.9E-02 |
| AT3G14930 | <i>HEME1</i>     | Uroporphyrinogen decarboxylase                                                       | 1.2  | 2.1E-01 | 3.5E-01 | 2.2 | 6.7E-08 | 2.2E-05 |
| AT1G68570 | <i>AT1G68570</i> | Major facilitator superfamily protein                                                | 2.9  | 2.8E-07 | 4.7E-06 | 2.2 | 3.0E-05 | 1.4E-03 |
| AT1G63820 | <i>AT1G63820</i> | CCT motif family protein                                                             | -1.3 | 2.9E-01 | 4.4E-01 | 2.2 | 5.4E-04 | 1.0E-02 |
| AT5G09220 | <i>AAP2</i>      | amino acid permease 2                                                                | -1.7 | 1.0E-03 | 5.0E-03 | 2.2 | 1.2E-05 | 7.5E-04 |
| AT5G48820 | <i>ICK6</i>      | inhibitor/interactor with cyclin-dependent kinase                                    | 1.5  | 8.7E-02 | 1.8E-01 | 2.2 | 1.0E-03 | 1.6E-02 |
| AT5G51910 | <i>AT5G51910</i> | TCP family transcription factor                                                      | 1.4  | 1.9E-02 | 5.4E-02 | 2.1 | 9.6E-06 | 6.7E-04 |
| AT4G19080 | <i>AT4G19080</i> | hypothetical protein (DUF594)                                                        | -1.0 | 8.6E-01 | 9.2E-01 | 2.1 | 4.0E-03 | 4.1E-02 |
| AT3G49410 | <i>AT3G49410</i> | Transcription factor IIC, subunit 5                                                  | 1.1  | 7.1E-01 | 8.1E-01 | 2.1 | 2.3E-03 | 2.8E-02 |
| AT1G33080 | <i>AT1G33080</i> | MATE efflux family protein                                                           | 1.3  | 1.6E-01 | 2.9E-01 | 2.1 | 3.2E-04 | 7.2E-03 |
| AT3G24240 | <i>AT3G24240</i> | Leucine-rich repeat receptor-like protein kinase family protein                      | 1.6  | 1.7E-02 | 5.1E-02 | 2.1 | 5.3E-04 | 1.0E-02 |
| AT5G08030 | <i>GDPD6</i>     | PLC-like phosphodiesterases superfamily protein                                      | -1.1 | 6.5E-01 | 7.7E-01 | 2.1 | 1.9E-03 | 2.4E-02 |
| AT2G15880 | <i>AT2G15880</i> | Leucine-rich repeat (LRR) family protein                                             | -1.4 | 1.1E-02 | 3.4E-02 | 2.1 | 4.2E-06 | 3.8E-04 |
| AT3G08920 | <i>AT3G08920</i> | Rhodanese/Cell cycle control phosphatase superfamily protein                         | 1.1  | 2.6E-01 | 4.1E-01 | 2.1 | 2.2E-09 | 2.0E-06 |
| AT5G44572 | <i>AT5G44572</i> | transmembrane protein                                                                | 1.6  | 1.7E-03 | 7.5E-03 | 2.1 | 1.6E-05 | 9.3E-04 |
| AT3G13960 | <i>GRF5</i>      | growth-regulating factor 5                                                           | 1.0  | 9.1E-01 | 9.5E-01 | 2.1 | 4.1E-03 | 4.1E-02 |
| AT2G23130 | <i>AGP17</i>     | arabinogalactan protein 17                                                           | 1.8  | 5.5E-07 | 8.4E-06 | 2.1 | 8.8E-09 | 5.9E-06 |
| AT1G35730 | <i>PUM9</i>      | pumilio 9                                                                            | -2.0 | 2.0E-02 | 5.7E-02 | 2.1 | 5.2E-03 | 4.8E-02 |
| AT5G27230 | <i>AT5G27230</i> | Frigida-like protein                                                                 | 1.4  | 1.2E-01 | 2.3E-01 | 2.1 | 5.8E-04 | 1.1E-02 |
| AT5G09445 | <i>AT5G09445</i> | hypothetical protein                                                                 | 1.3  | 2.4E-01 | 3.8E-01 | 2.0 | 2.9E-03 | 3.3E-02 |
| AT1G33930 | <i>AT1G33930</i> | P-loop containing nucleoside triphosphate hydrolases superfamily protein             | 1.3  | 2.4E-01 | 3.8E-01 | 2.0 | 1.2E-03 | 1.8E-02 |
| AT5G64490 | <i>AT5G64490</i> | ARM repeat superfamily protein                                                       | -1.5 | 8.2E-02 | 1.7E-01 | 2.0 | 7.8E-04 | 1.3E-02 |
| AT2G18800 | <i>XTH21</i>     | xyloglucan endotransglucosylase/hydrolase 21                                         | -2.8 | 1.7E-05 | 1.6E-04 | 2.0 | 2.3E-04 | 5.8E-03 |
| AT1G54000 | <i>GLL22</i>     | GDSL-like Lipase/Acylhydrolase superfamily protein                                   | -2.1 | 6.6E-04 | 3.5E-03 | 2.0 | 7.4E-04 | 1.3E-02 |

| <i>pif45</i> /Col WL Down |                  |                                                                          | Col UV/WL    |         |                 | <i>pif45</i> /Col WL    |         |                 |
|---------------------------|------------------|--------------------------------------------------------------------------|--------------|---------|-----------------|-------------------------|---------|-----------------|
| AGI                       | gene             | description                                                              | Col_UV/WL_FC | pvalue  | pvalue_with_FDR | <i>pif45</i> /Col_WL_FC | pvalue  | pvalue_with_FDR |
| AT3G01345                 | <i>AT3G01345</i> | Expressed protein                                                        | 1.0          | 9.9E-01 | 1.0E+00         | -292.4                  | 1.2E-06 | 1.5E-04         |
| AT3G03260                 | <i>HDG8</i>      | homeodomain GLABROUS 8                                                   | -3.6         | 5.4E-03 | 2.0E-02         | -102.8                  | 1.7E-06 | 2.0E-04         |
| AT3G30720                 | <i>QQS</i>       | qua-quine starch                                                         | 1.1          | 8.6E-01 | 9.2E-01         | -52.1                   | 2.4E-05 | 1.2E-03         |
| AT1G15405                 | <i>AT1G15405</i> |                                                                          | -51.7        | 2.9E-05 | 2.5E-04         | -46.6                   | 3.3E-05 | 1.5E-03         |
| AT4G13790                 | <i>AT4G13790</i> | SAUR-like auxin-responsive protein family                                | -11.9        | 9.7E-03 | 3.2E-02         | -44.5                   | 2.0E-03 | 2.5E-02         |
| AT3G43400                 | <i>AT3G43400</i> | ELMO/CED-12 family protein                                               | -8.8         | 1.4E-02 | 4.3E-02         | -32.7                   | 2.2E-03 | 2.7E-02         |
| ATMG01380                 | <i>RRN5</i>      |                                                                          | -9.7         | 4.0E-04 | 2.3E-03         | -27.3                   | 2.1E-05 | 1.1E-03         |
| AT3G59060                 | <i>PIL6</i>      | phytochrome interacting factor 3-like 6                                  | 1.1          | 6.2E-01 | 7.5E-01         | -21.6                   | 4.9E-16 | 1.1E-11         |
| AT1G20520                 | <i>AT1G20520</i> | DUF241 domain protein, putative (DUF241)                                 | -4.4         | 1.4E-03 | 6.5E-03         | -20.5                   | 4.9E-06 | 4.3E-04         |
| AT2G22810                 | <i>ACS4</i>      | 1-aminocyclopropane-1-carboxylate synthase 4                             | -4.8         | 7.1E-04 | 3.7E-03         | -19.5                   | 2.2E-06 | 2.5E-04         |
| AT2G46970                 | <i>PIL1</i>      | phytochrome interacting factor 3-like 1                                  | -2.7         | 2.2E-03 | 9.4E-03         | -19.1                   | 1.1E-08 | 6.8E-06         |
| AT3G29060                 | <i>AT3G29060</i> | EXS (ERD1/XPR1/SYG1) family protein                                      | -2.0         | 6.8E-02 | 1.5E-01         | -17.2                   | 1.4E-05 | 8.5E-04         |
| AT2G31141                 | <i>AT2G31141</i> | hypothetical protein                                                     | -19.8        | 8.5E-05 | 6.1E-04         | -17.0                   | 1.2E-04 | 3.5E-03         |
| AT4G10160                 | <i>AT4G10160</i> | RING/U-box superfamily protein                                           | -25.9        | 1.4E-06 | 1.9E-05         | -16.5                   | 3.5E-06 | 3.3E-04         |
| AT5G37300                 | <i>WSD1</i>      | O-acyltransferase (WSD1-like) family protein                             | -11.7        | 2.9E-05 | 2.5E-04         | -15.5                   | 1.0E-05 | 6.9E-04         |
| AT1G52830                 | <i>IAA6</i>      | indole-3-acetic acid 6                                                   | -7.8         | 4.5E-06 | 5.2E-05         | -14.9                   | 1.4E-07 | 3.4E-05         |
| AT4G32280                 | <i>IAA29</i>     | indole-3-acetic acid inducible 29                                        | -3.6         | 2.7E-05 | 2.4E-04         | -14.6                   | 4.0E-10 | 6.8E-07         |
| AT5G04380                 | <i>AT5G04380</i> | S-adenosyl-L-methionine-dependent methyltransferases superfamily protein | 1.3          | 6.0E-01 | 7.3E-01         | -14.6                   | 1.1E-03 | 1.7E-02         |
| AT5G37940                 | <i>AT5G37940</i> | Zinc-binding dehydrogenase family protein                                | -50.3        | 3.1E-04 | 1.8E-03         | -14.3                   | 1.1E-03 | 1.7E-02         |
| ATCG00700                 | <i>PSBN</i>      | photosystem II reaction center protein N                                 | -26.2        | 2.5E-04 | 1.5E-03         | -13.9                   | 6.5E-04 | 1.2E-02         |
| AT5G37950                 | <i>AT5G37950</i> | UDP-Glycosyltransferase superfamily protein                              | -7.5         | 3.6E-09 | 1.1E-07         | -13.7                   | 5.4E-11 | 3.1E-07         |
| AT5G07010                 | <i>ST2A</i>      | sulfotransferase 2A                                                      | -7.8         | 2.6E-06 | 3.3E-05         | -12.5                   | 1.6E-07 | 3.7E-05         |
| AT5G44440                 | <i>AT5G44440</i> | FAD-binding Berberine family protein                                     | -11.6        | 1.8E-07 | 3.1E-06         | -12.3                   | 1.2E-07 | 3.0E-05         |
| AT3G09640                 | <i>APX2</i>      | ascorbate peroxidase 2                                                   | 1.5          | 3.3E-01 | 4.8E-01         | -12.1                   | 1.8E-03 | 2.3E-02         |
| AT5G57810                 | <i>TET15</i>     | tetraspanin15                                                            | 1.3          | 3.6E-01 | 5.1E-01         | -10.9                   | 2.7E-06 | 2.8E-04         |
| AT3G48960                 | <i>AT3G48960</i> | Ribosomal protein L13e family protein                                    | -1.1         | 8.3E-01 | 9.0E-01         | -10.7                   | 8.0E-04 | 1.4E-02         |
| AT2G18010                 | <i>AT2G18010</i> | SAUR-like auxin-responsive protein family                                | -3.9         | 2.8E-03 | 1.2E-02         | -10.3                   | 3.8E-05 | 1.7E-03         |
| AT4G37770                 | <i>ACS8</i>      | 1-amino-cyclopropane-1-carboxylate synthase 8                            | -14.6        | 5.2E-05 | 4.1E-04         | -9.8                    | 1.4E-04 | 3.9E-03         |
| AT5G53870                 | <i>ENODL1</i>    | early nodulin-like protein 1                                             | -1.1         | 6.2E-01 | 7.4E-01         | -9.7                    | 1.4E-09 | 1.7E-06         |
| AT5G18050                 | <i>SAUR22</i>    | SAUR-like auxin-responsive protein family                                | -1.9         | 5.0E-02 | 1.2E-01         | -9.4                    | 6.5E-07 | 9.9E-05         |
| AT3G15540                 | <i>IAA19</i>     | indole-3-acetic acid inducible 19                                        | -5.6         | 8.2E-07 | 1.2E-05         | -9.3                    | 1.5E-08 | 9.0E-06         |
| AT3G02670                 | <i>AT3G02670</i> | Glycine-rich protein family                                              | -5.8         | 8.4E-09 | 2.3E-07         | -9.3                    | 1.2E-10 | 3.1E-07         |

|           |           |                                                                                               |       |         |         |      |         |         |
|-----------|-----------|-----------------------------------------------------------------------------------------------|-------|---------|---------|------|---------|---------|
| AT5G66260 | AT5G66260 | SAUR-like auxin-responsive protein family                                                     | -25.2 | 4.3E-08 | 9.3E-07 | -8.9 | 1.0E-06 | 1.4E-04 |
| AT5G22500 | FAR1      | fatty acid reductase 1                                                                        | -5.7  | 1.1E-05 | 1.1E-04 | -8.9 | 4.7E-07 | 7.9E-05 |
| AT1G68800 | TCP12     | TCP domain protein 12                                                                         | -3.5  | 1.5E-05 | 1.4E-04 | -8.8 | 9.2E-09 | 6.1E-06 |
| AT4G35720 | AT4G35720 | DUF241 domain protein, putative (DUF241)                                                      | -5.1  | 5.1E-06 | 5.7E-05 | -8.7 | 9.4E-08 | 2.7E-05 |
| AT1G54040 | ESP       | epithiospecifier protein                                                                      | -1.0  | 9.4E-01 | 9.7E-01 | -8.6 | 1.1E-05 | 7.5E-04 |
| AT1G80740 | CMT1      | chromomethylase 1                                                                             | -7.8  | 1.8E-05 | 1.6E-04 | -8.6 | 8.3E-06 | 6.1E-04 |
| AT5G02540 | AT5G02540 | NAD(P)-binding Rossmann-fold superfamily protein                                              | -3.5  | 3.8E-04 | 2.2E-03 | -8.1 | 7.8E-07 | 1.2E-04 |
| AT1G29395 | COR413IM1 | COLD REGULATED 314 INNER MEMBRANE 1                                                           | -2.1  | 5.3E-02 | 1.2E-01 | -8.1 | 1.6E-05 | 9.5E-04 |
| AT5G35525 | AT5G35525 | PLAC8 family protein                                                                          | -2.5  | 6.1E-05 | 4.7E-04 | -7.8 | 1.1E-10 | 3.1E-07 |
| AT4G01190 | PIP10     | phosphatidylinositol phosphate kinase 10                                                      | -1.5  | 2.3E-01 | 3.7E-01 | -7.6 | 1.5E-05 | 9.1E-04 |
| AT5G50750 | RGP4      | reversibly glycosylated polypeptide 4                                                         | -2.6  | 4.7E-02 | 1.1E-01 | -7.6 | 9.1E-04 | 1.5E-02 |
| AT3G41768 | AT3G41768 |                                                                                               | -6.6  | 5.1E-03 | 1.9E-02 | -7.6 | 3.1E-03 | 3.4E-02 |
| ATCG01210 | RRN16S.2  |                                                                                               | -7.2  | 3.5E-03 | 1.4E-02 | -7.6 | 2.8E-03 | 3.2E-02 |
| AT3G52310 | ABCG27    | ABC transporter G family member 27                                                            | 1.9   | 2.5E-02 | 6.8E-02 | -7.4 | 8.0E-05 | 2.8E-03 |
| AT2G47880 | AT2G47880 | Glutaredoxin family protein                                                                   | 1.5   | 3.5E-01 | 5.0E-01 | -7.3 | 1.8E-03 | 2.4E-02 |
| AT2G07687 | AT2G07687 | Cytochrome c oxidase, subunit III                                                             | -3.0  | 5.7E-02 | 1.3E-01 | -7.2 | 4.7E-03 | 4.5E-02 |
| AT2G01010 | AT2G01010 |                                                                                               | -8.7  | 9.5E-04 | 4.7E-03 | -7.2 | 1.6E-03 | 2.2E-02 |
| AT2G34655 | AT2G34655 | hypothetical protein                                                                          | -3.5  | 3.1E-02 | 8.0E-02 | -7.1 | 3.8E-03 | 3.9E-02 |
| AT5G18010 | SAUR19    | SAUR-like auxin-responsive protein family                                                     | -2.7  | 2.7E-03 | 1.1E-02 | -7.0 | 3.0E-06 | 3.0E-04 |
| AT2G01770 | VIT1      | vacuolar iron transporter 1                                                                   | -6.2  | 5.4E-03 | 2.0E-02 | -6.7 | 3.7E-03 | 3.8E-02 |
| AT1G73700 | AT1G73700 | MATE efflux family protein                                                                    | 1.0   | 9.3E-01 | 9.6E-01 | -6.6 | 4.1E-03 | 4.1E-02 |
| AT3G30120 | AT3G30120 | pseudogene of mediator of RNA polymerase II transcription subunit                             | -1.6  | 1.3E-01 | 2.4E-01 | -6.5 | 1.9E-05 | 1.0E-03 |
| AT3G23635 | RTFL13    | ROTUNDIFOLIA like 13                                                                          | -9.7  | 4.6E-06 | 5.3E-05 | -6.5 | 2.0E-05 | 1.1E-03 |
| AT1G15580 | IAA5      | indole-3-acetic acid inducible 5                                                              | -2.3  | 1.2E-02 | 3.8E-02 | -6.5 | 1.7E-05 | 9.6E-04 |
| AT5G51210 | OLEO3     | oleosin3                                                                                      | -5.5  | 7.6E-05 | 5.6E-04 | -6.4 | 2.9E-05 | 1.4E-03 |
| AT2G16140 | AT2G16140 | transposable_element_gene                                                                     | 1.3   | 4.4E-01 | 5.9E-01 | -6.3 | 2.7E-03 | 3.1E-02 |
| ATCG00210 | YCF6      | electron transporter, transferring electrons within cytochrome b6/f complex of photosystem II | -9.9  | 1.3E-03 | 5.9E-03 | -6.2 | 4.0E-03 | 4.0E-02 |
| AT5G06720 | PA2       | peroxidase 2                                                                                  | -4.8  | 2.9E-07 | 4.9E-06 | -6.2 | 2.3E-08 | 1.2E-05 |
| AT5G64590 | AT5G64590 | NYN domain protein                                                                            | -1.9  | 1.1E-01 | 2.2E-01 | -6.1 | 8.8E-04 | 1.5E-02 |
| AT1G73120 | AT1G73120 | F-box/RNI superfamily protein                                                                 | -2.9  | 3.1E-03 | 1.3E-02 | -6.1 | 1.2E-05 | 7.6E-04 |
| AT4G31380 | FLP1      | flowering-promoting factor-like protein                                                       | -2.2  | 1.5E-02 | 4.4E-02 | -6.0 | 6.3E-06 | 5.1E-04 |
| AT4G10020 | HSD5      | hydroxysteroid dehydrogenase 5                                                                | -5.5  | 4.3E-05 | 3.5E-04 | -6.0 | 2.2E-05 | 1.1E-03 |
| AT3G28857 | PRE5      | basic helix-loop-helix (bHLH) DNA-binding family protein                                      | -5.0  | 6.4E-05 | 4.9E-04 | -5.8 | 2.0E-05 | 1.1E-03 |
| AT2G21140 | PRP2      | proline-rich protein 2                                                                        | -1.7  | 3.2E-03 | 1.3E-02 | -5.7 | 8.1E-11 | 3.1E-07 |
| AT3G60700 | AT3G60700 | hypothetical protein (DUF1163)                                                                | -2.7  | 6.3E-04 | 3.3E-03 | -5.6 | 9.9E-07 | 1.4E-04 |
| AT1G60450 | GolS7     | galactinol synthase 7                                                                         | -3.3  | 1.5E-02 | 4.4E-02 | -5.6 | 1.7E-03 | 2.3E-02 |
| AT4G12410 | AT4G12410 | SAUR-like auxin-responsive protein family                                                     | -2.6  | 6.1E-03 | 2.2E-02 | -5.4 | 5.7E-05 | 2.2E-03 |
| AT5G64210 | AOX2      | alternative oxidase 2                                                                         | -1.6  | 2.7E-01 | 4.2E-01 | -5.3 | 1.6E-03 | 2.2E-02 |
| AT4G19970 | AT4G19970 | nucleotide-diphospho-sugar transferase family protein                                         | -1.3  | 3.3E-01 | 4.8E-01 | -5.3 | 4.9E-05 | 2.0E-03 |
| AT5G18060 | SAUR23    | SAUR-like auxin-responsive protein family                                                     | -1.8  | 4.3E-02 | 1.0E-01 | -5.2 | 4.4E-06 | 4.0E-04 |
| AT1G28450 | AGL58     | AGAMOUS-like 58                                                                               | -13.0 | 1.3E-04 | 8.7E-04 | -5.1 | 1.4E-03 | 1.9E-02 |
| AT4G25420 | GA20OX1   | 2-oxoglutarate (2OG) and Fe(II)-dependent oxygenase superfamily protein                       | -7.1  | 6.1E-08 | 1.2E-06 | -5.0 | 8.7E-07 | 1.3E-04 |
| AT5G44130 | FLA13     | FASCICLIN-like arabinogalactan protein 13                                                     | 1.5   | 2.1E-02 | 5.9E-02 | -5.0 | 1.5E-09 | 1.7E-06 |
| AT1G34480 | AT1G34480 | Cysteine/Histidine-rich C1 domain family protein                                              | -1.6  | 2.8E-01 | 4.3E-01 | -5.0 | 3.2E-03 | 3.5E-02 |
| AT4G16515 | RGF6      | root meristem growth factor                                                                   | -3.7  | 1.8E-05 | 1.7E-04 | -5.0 | 1.1E-06 | 1.4E-04 |
| AT3G59010 | PME61     | pectin methylesterase 61                                                                      | -2.2  | 2.5E-03 | 1.1E-02 | -4.9 | 6.4E-07 | 9.9E-05 |
| AT4G08109 | AT4G08109 | transposable_element_gene                                                                     | -2.8  | 7.3E-04 | 3.8E-03 | -4.9 | 9.6E-06 | 6.7E-04 |
| AT4G32500 | KT5       | K transporter 5                                                                               | -1.7  | 1.8E-01 | 3.1E-01 | -4.9 | 2.7E-03 | 3.2E-02 |
| AT2G36110 | AT2G36110 | Polynucleotidyl transferase, ribonuclease H-like superfamily protein                          | -1.7  | 8.8E-02 | 1.8E-01 | -4.9 | 5.8E-05 | 2.2E-03 |
| AT1G51530 | AT1G51530 | RNA-binding (RRM/RBD/RNP motifs) family protein                                               | -3.2  | 2.3E-03 | 9.8E-03 | -4.9 | 1.6E-04 | 4.4E-03 |
| AT2G01200 | IAA32     | indole-3-acetic acid inducible 32                                                             | -3.2  | 1.1E-03 | 5.3E-03 | -4.8 | 6.7E-05 | 2.5E-03 |
| AT1G18835 | MIF3      | mini zinc finger                                                                              | -6.4  | 8.3E-05 | 6.0E-04 | -4.8 | 2.6E-04 | 6.3E-03 |
| AT5G67020 | AT5G67020 | hypothetical protein                                                                          | -3.1  | 1.6E-04 | 1.1E-03 | -4.8 | 3.3E-06 | 3.2E-04 |
| AT1G63710 | CYP86A7   | cytochrome P450, family 86, subfamily A, polypeptide 7                                        | -3.5  | 1.6E-02 | 4.7E-02 | -4.7 | 4.7E-03 | 4.5E-02 |
| AT5G18080 | SAUR24    | SAUR-like auxin-responsive protein family                                                     | -2.0  | 1.9E-02 | 5.5E-02 | -4.7 | 1.5E-05 | 8.9E-04 |
| AT3G48790 | AT3G48790 | Pyridoxal phosphate (PLP)-dependent transferases superfamily protein                          | -2.2  | 1.8E-04 | 1.2E-03 | -4.7 | 5.2E-09 | 3.8E-06 |
| AT5G61660 | AT5G61660 | glycine-rich protein                                                                          | -2.6  | 1.2E-05 | 1.2E-04 | -4.7 | 7.1E-09 | 4.9E-06 |
| AT3G59440 | AT3G59440 | Calcium-binding EF-hand family protein                                                        | -4.0  | 1.5E-03 | 6.9E-03 | -4.6 | 6.4E-04 | 1.2E-02 |
| AT1G12080 | AT1G12080 | Vacuolar calcium-binding protein-like protein                                                 | -4.0  | 9.6E-10 | 3.5E-08 | -4.6 | 1.3E-10 | 3.1E-07 |
| AT2G18150 | AT2G18150 | Peroxidase superfamily protein                                                                | 1.2   | 3.0E-01 | 4.5E-01 | -4.6 | 2.9E-08 | 1.3E-05 |
| AT3G13900 | AT3G13900 | ATPase E1-E2 type family protein / haloacid dehalogenase-like hydrolase family protein        | -6.0  | 4.1E-08 | 8.9E-07 | -4.5 | 3.4E-07 | 6.2E-05 |
| AT1G29490 | AT1G29490 | SAUR-like auxin-responsive protein family                                                     | -4.8  | 1.1E-04 | 7.9E-04 | -4.5 | 1.4E-04 | 4.0E-03 |
| AT4G34770 | AT4G34770 | SAUR-like auxin-responsive protein family                                                     | -2.2  | 7.9E-04 | 4.0E-03 | -4.4 | 2.2E-07 | 4.6E-05 |
| AT2G45610 | AT2G45610 | alpha/beta-Hydrolases superfamily protein                                                     | -2.5  | 3.9E-03 | 1.5E-02 | -4.4 | 3.7E-05 | 1.6E-03 |
| AT1G04180 | YUC9      | YUCCA 9                                                                                       | -5.3  | 3.4E-05 | 2.9E-04 | -4.4 | 1.2E-04 | 3.7E-03 |
| AT4G11190 | AT4G11190 | Disease resistance-responsive (dirigent-like protein) family protein                          | -3.3  | 2.0E-05 | 1.8E-04 | -4.3 | 9.0E-07 | 1.3E-04 |
| AT1G18400 | BEE1      | BR enhanced expression 1                                                                      | -1.3  | 1.9E-01 | 3.2E-01 | -4.2 | 3.0E-08 | 1.4E-05 |
| AT1G75900 | AT1G75900 | GDSL-like Lipase/Acylhydrolase superfamily protein                                            | -2.5  | 6.0E-06 | 6.5E-05 | -4.2 | 2.3E-09 | 2.0E-06 |
| AT4G38825 | AT4G38825 | SAUR-like auxin-responsive protein family                                                     | -1.7  | 1.6E-02 | 4.7E-02 | -4.1 | 2.8E-07 | 5.4E-05 |
| AT5G15430 | AT5G15430 | Plant calmodulin-binding protein-like protein                                                 | -4.2  | 7.0E-04 | 3.6E-03 | -4.1 | 6.0E-04 | 1.1E-02 |
| AT5G18020 | SAUR20    | SAUR-like auxin-responsive protein family                                                     | -1.0  | 9.2E-01 | 9.6E-01 | -4.1 | 5.5E-07 | 9.1E-05 |
| AT4G22710 | CYP706A2  | cytochrome P450, family 706, subfamily A, polypeptide 2                                       | -1.8  | 1.2E-01 | 2.2E-01 | -4.1 | 1.3E-03 | 1.8E-02 |



|           |           |                                                                                           |      |         |         |      |         |         |
|-----------|-----------|-------------------------------------------------------------------------------------------|------|---------|---------|------|---------|---------|
| AT1G26890 | AT1G26890 | FBD, F-box and Leucine Rich Repeat domains containing protein                             | -2.7 | 8.0E-04 | 4.1E-03 | -4.1 | 2.1E-05 | 1.1E-03 |
| AT5G17860 | CAX7      | calcium exchanger 7                                                                       | -1.7 | 1.5E-01 | 2.7E-01 | -4.0 | 7.6E-04 | 1.3E-02 |
| AT5G18030 | AT5G18030 | SAUR-like auxin-responsive protein family                                                 | -1.1 | 8.4E-01 | 9.0E-01 | -4.0 | 1.5E-05 | 9.2E-04 |
| AT1G69540 | AGL94     | AGAMOUS-like 94                                                                           | -1.2 | 5.9E-01 | 7.2E-01 | -4.0 | 1.7E-04 | 4.6E-03 |
| AT1G73550 | AT1G73550 | Bifunctional inhibitor/lipid-transfer protein/seed storage 2S albumin superfamily protein | -1.7 | 1.1E-01 | 2.1E-01 | -3.9 | 5.2E-04 | 1.0E-02 |
| AT4G11170 | AT4G11170 | Disease resistance protein (TIR-NBS-LRR class)                                            | -1.3 | 3.3E-01 | 4.8E-01 | -3.9 | 4.4E-04 | 9.0E-03 |
| AT1G01390 | AT1G01390 | UDP-Glycosyltransferase superfamily protein                                               | -1.1 | 7.3E-01 | 8.2E-01 | -3.9 | 9.6E-06 | 6.7E-04 |
| AT3G14370 | WAG2      | Protein kinase superfamily protein                                                        | -8.5 | 1.1E-10 | 5.4E-09 | -3.8 | 2.6E-07 | 5.2E-05 |
| AT1G09350 | GolS3     | galactinol synthase 3                                                                     | -3.6 | 3.5E-04 | 2.0E-03 | -3.8 | 2.3E-04 | 5.7E-03 |
| AT5G49130 | AT5G49130 | MATE efflux family protein                                                                | -1.3 | 4.5E-01 | 6.0E-01 | -3.8 | 1.7E-03 | 2.2E-02 |
| AT5G63820 | AT5G63820 | hypothetical protein (DUF626)                                                             | -4.8 | 7.1E-08 | 1.4E-06 | -3.8 | 8.2E-07 | 1.2E-04 |
| AT3G28540 | AT3G28540 | P-loop containing nucleoside triphosphate hydrolases superfamily protein                  | 1.8  | 2.1E-03 | 9.2E-03 | -3.7 | 7.0E-07 | 1.1E-04 |
| AT4G17470 | AT4G17470 | alpha/beta-Hydrolases superfamily protein                                                 | -2.1 | 2.6E-03 | 1.1E-02 | -3.7 | 5.5E-06 | 4.6E-04 |
| AT4G04223 | AT4G04223 |                                                                                           | -1.1 | 8.5E-01 | 9.1E-01 | -3.7 | 2.1E-03 | 2.6E-02 |
| AT5G24580 | AT5G24580 | Heavy metal transport/detoxification superfamily protein                                  | -2.4 | 1.6E-03 | 7.3E-03 | -3.7 | 1.6E-05 | 9.3E-04 |
| AT5G13700 | PAO1      | polyamine oxidase 1                                                                       | -2.7 | 9.7E-06 | 9.8E-05 | -3.7 | 1.0E-07 | 2.8E-05 |
| AT5G22580 | AT5G22580 | Stress responsive A/B Barrel Domain-containing protein                                    | -2.7 | 8.1E-06 | 8.4E-05 | -3.7 | 8.2E-08 | 2.5E-05 |
| AT2G05950 | AT2G05950 | transposable_element_gene                                                                 | -1.6 | 1.7E-01 | 3.0E-01 | -3.6 | 2.9E-03 | 3.3E-02 |
| AT5G07000 | ST2B      | sulfotransferase 2B                                                                       | -1.6 | 3.5E-03 | 1.4E-02 | -3.6 | 2.1E-09 | 2.0E-06 |
| AT4G27580 | AT4G27580 | phosphatidylinositol transfer SFH5-like protein                                           | -1.9 | 1.1E-01 | 2.1E-01 | -3.6 | 5.2E-03 | 4.8E-02 |
| AT1G78970 | LUP1      | lupeol synthase 1                                                                         | -1.2 | 2.8E-01 | 4.2E-01 | -3.6 | 1.1E-09 | 1.5E-06 |
| AT1G04660 | AT1G04660 | glycine-rich protein                                                                      | -2.6 | 3.8E-05 | 3.1E-04 | -3.6 | 5.6E-07 | 9.1E-05 |
| AT3G18530 | AT3G18530 | ARM repeat superfamily protein                                                            | -3.1 | 5.5E-03 | 2.0E-02 | -3.6 | 2.2E-03 | 2.7E-02 |
| AT2G14900 | AT2G14900 | Gibberellin-regulated family protein                                                      | -3.8 | 5.1E-10 | 2.1E-08 | -3.6 | 1.0E-09 | 1.5E-06 |
| AT1G75450 | CKX5      | cytokinin oxidase 5                                                                       | -2.4 | 6.1E-04 | 3.2E-03 | -3.6 | 7.2E-06 | 5.5E-04 |
| AT3G48970 | AT3G48970 | Heavy metal transport/detoxification superfamily protein                                  | -1.2 | 3.1E-01 | 4.6E-01 | -3.6 | 9.5E-07 | 1.4E-04 |
| AT2G25000 | WRKY60    | WRKY DNA-binding protein 60                                                               | -2.6 | 1.1E-05 | 1.1E-04 | -3.6 | 7.9E-08 | 2.5E-05 |
| AT5G53980 | HB52      | homeobox protein 52                                                                       | -1.3 | 2.5E-01 | 4.0E-01 | -3.6 | 1.5E-06 | 1.9E-04 |
| AT5G50335 | AT5G50335 | hypothetical protein                                                                      | -2.9 | 1.2E-03 | 5.7E-03 | -3.6 | 2.0E-04 | 5.2E-03 |
| AT5G03435 | AT5G03435 | Ca2 dependent plant phosphoribosyltransferase family protein                              | -1.5 | 2.1E-01 | 3.5E-01 | -3.5 | 1.9E-03 | 2.4E-02 |
| AT4G10150 | AT4G10150 | RING/U-box superfamily protein                                                            | -2.7 | 7.6E-04 | 3.9E-03 | -3.5 | 5.8E-05 | 2.2E-03 |
| AT1G68725 | AGP19     | arabinogalactan protein 19                                                                | 1.0  | 8.2E-01 | 8.9E-01 | -3.4 | 8.3E-08 | 2.5E-05 |
| AT5G41900 | AT5G41900 | alpha/beta-Hydrolases superfamily protein                                                 | -2.4 | 4.5E-05 | 3.6E-04 | -3.4 | 2.0E-07 | 4.4E-05 |
| AT1G53690 | AT1G53690 | DNA directed RNA polymerase, 7 kDa subunit                                                | -5.3 | 3.6E-08 | 7.9E-07 | -3.4 | 2.6E-06 | 2.8E-04 |
| AT1G63380 | AT1G63380 | NAD(P)-binding Rossmann-fold superfamily protein                                          | -2.1 | 3.8E-02 | 9.4E-02 | -3.4 | 2.6E-03 | 3.0E-02 |
| AT3G17050 | AT3G17050 | transposable_element_gene                                                                 | -1.9 | 3.3E-04 | 1.9E-03 | -3.4 | 3.5E-08 | 1.4E-05 |
| AT1G68620 | AT1G68620 | alpha/beta-Hydrolases superfamily protein                                                 | 1.7  | 1.1E-02 | 3.6E-02 | -3.4 | 8.9E-06 | 6.4E-04 |
| AT3G03830 | SAUR28    | SAUR-like auxin-responsive protein family                                                 | -2.2 | 2.4E-03 | 1.0E-02 | -3.4 | 2.3E-05 | 1.2E-03 |
| AT1G74420 | FUT3      | fucosyltransferase 3                                                                      | -2.7 | 1.3E-04 | 8.9E-04 | -3.4 | 8.1E-06 | 6.0E-04 |
| AT5G12940 | AT5G12940 | Leucine-rich repeat (LRR) family protein                                                  | -5.6 | 2.5E-08 | 5.9E-07 | -3.4 | 5.9E-06 | 4.9E-04 |
| AT4G10310 | HKT1      | high-affinity K transporter 1                                                             | -1.1 | 5.7E-01 | 7.0E-01 | -3.4 | 1.1E-06 | 1.5E-04 |
| AT4G38850 | SAUR15    | SAUR-like auxin-responsive protein family                                                 | -1.4 | 1.6E-01 | 2.8E-01 | -3.3 | 4.8E-05 | 1.9E-03 |
| AT3G28890 | RLP43     | receptor like protein 43                                                                  | 1.2  | 6.3E-01 | 7.5E-01 | -3.3 | 4.0E-03 | 4.1E-02 |
| AT2G07711 | AT2G07711 | pseudogene of NADH dehydrogenase 5B                                                       | -2.3 | 2.1E-02 | 5.9E-02 | -3.3 | 2.7E-03 | 3.1E-02 |
| AT1G67265 | RTFL21    | ROTUNDIFOLIA like 21                                                                      | -5.8 | 9.8E-06 | 9.9E-05 | -3.2 | 5.6E-04 | 1.1E-02 |
| AT2G46440 | CNGC11    | cyclic nucleotide-gated channels                                                          | 1.0  | 9.3E-01 | 9.6E-01 | -3.2 | 2.4E-03 | 2.8E-02 |
| AT4G25260 | AT4G25260 | Plant invertase/pectin methylesterase inhibitor superfamily protein                       | -2.1 | 7.0E-04 | 3.6E-03 | -3.2 | 1.8E-06 | 2.2E-04 |
| AT1G68350 | AT1G68350 | cotton fiber protein                                                                      | -1.7 | 1.1E-02 | 3.4E-02 | -3.2 | 2.5E-06 | 2.7E-04 |
| AT1G18870 | ICS2      | isochorismate synthase 2                                                                  | -1.6 | 1.1E-02 | 3.6E-02 | -3.1 | 2.2E-07 | 4.6E-05 |
| AT5G39860 | PRE1      | basic helix-loop-helix (bHLH) DNA-binding family protein                                  | -1.9 | 4.2E-04 | 2.4E-03 | -3.1 | 1.4E-07 | 3.4E-05 |
| AT3G48300 | CYP71A23  | cytochrome P450, family 71, subfamily A, polypeptide 23                                   | -4.6 | 4.2E-04 | 2.4E-03 | -3.1 | 2.7E-03 | 3.1E-02 |
| AT1G29460 | AT1G29460 | SAUR-like auxin-responsive protein family                                                 | -1.5 | 1.4E-01 | 2.6E-01 | -3.1 | 2.2E-04 | 5.5E-03 |
| AT4G01335 | AT4G01335 | TATA box-binding protein associated factor RNA polymerase I subunit B-like protein        | -4.2 | 6.2E-06 | 6.7E-05 | -3.1 | 8.8E-05 | 3.0E-03 |
| AT5G33340 | CDR1      | Eukaryotic aspartyl protease family protein                                               | -1.5 | 2.4E-01 | 3.8E-01 | -3.1 | 4.8E-03 | 4.5E-02 |
| AT3G03840 | SAUR27    | SAUR-like auxin-responsive protein family                                                 | -1.7 | 2.1E-02 | 5.8E-02 | -3.1 | 4.6E-05 | 1.9E-03 |
| AT1G17810 | BETA-TIP  | beta-tonoplast intrinsic protein                                                          | -5.5 | 2.2E-05 | 1.9E-04 | -3.1 | 1.3E-03 | 1.9E-02 |
| AT5G24770 | VSP2      | vegetative storage protein 2                                                              | 1.1  | 6.0E-01 | 7.3E-01 | -3.1 | 3.0E-04 | 6.9E-03 |
| AT1G26730 | AT1G26730 | EXS (ERD1/XPR1/SYG1) family protein                                                       | -2.8 | 1.6E-05 | 1.5E-04 | -3.1 | 4.8E-06 | 4.2E-04 |
| AT3G03850 | SAUR26    | SAUR-like auxin-responsive protein family                                                 | -1.9 | 2.8E-03 | 1.2E-02 | -3.1 | 3.9E-06 | 3.6E-04 |
| AT1G16850 | AT1G16850 | transmembrane protein                                                                     | 1.5  | 8.0E-02 | 1.7E-01 | -3.1 | 1.2E-04 | 3.7E-03 |
| AT2G26695 | AT2G26695 | Ran BP2/NZF zinc finger-like superfamily protein                                          | -1.5 | 6.4E-02 | 1.4E-01 | -3.0 | 1.6E-05 | 9.3E-04 |
| AT1G76610 | AT1G76610 | MIZU-KUSSEI-like protein (Protein of unknown function, DUF617)                            | -3.1 | 4.6E-03 | 1.7E-02 | -3.0 | 4.7E-03 | 4.5E-02 |
| AT5G10770 | AT5G10770 | Eukaryotic aspartyl protease family protein                                               | -1.1 | 5.8E-01 | 7.1E-01 | -3.0 | 3.1E-07 | 5.8E-05 |
| AT1G01600 | CYP86A4   | cytochrome P450, family 86, subfamily A, polypeptide 4                                    | -1.7 | 3.8E-03 | 1.5E-02 | -3.0 | 3.2E-07 | 5.9E-05 |
| AT4G18970 | AT4G18970 | GDSL-like Lipase/Acylhydrolase superfamily protein                                        | -2.3 | 2.7E-06 | 3.3E-05 | -3.0 | 1.5E-08 | 9.0E-06 |
| AT5G03090 | AT5G03090 | Mto 1 responding down protein                                                             | 1.3  | 2.8E-01 | 4.3E-01 | -3.0 | 1.5E-03 | 2.1E-02 |
| AT1G21520 | AT1G21520 | hypothetical protein                                                                      | -3.6 | 1.4E-03 | 6.3E-03 | -3.0 | 3.7E-03 | 3.8E-02 |
| AT1G49900 | AT1G49900 | C2H2 type zinc finger transcription factor family                                         | -1.2 | 5.1E-01 | 6.5E-01 | -3.0 | 9.3E-04 | 1.5E-02 |
| AT3G42800 | AT3G42800 | AF-like protein                                                                           | -2.7 | 1.8E-04 | 1.2E-03 | -3.0 | 5.4E-05 | 2.1E-03 |
| AT4G14560 | IAA1      | indole-3-acetic acid inducible                                                            | -1.4 | 1.2E-01 | 2.3E-01 | -3.0 | 7.1E-06 | 5.5E-04 |

|           |           |                                                                       |      |         |         |      |         |         |
|-----------|-----------|-----------------------------------------------------------------------|------|---------|---------|------|---------|---------|
| AT3G55940 | AT3G55940 | Phosphoinositide-specific phospholipase C family protein              | -1.6 | 1.1E-02 | 3.4E-02 | -3.0 | 1.4E-06 | 1.8E-04 |
| AT4G14130 | XTH15     | xyloglucan endotransglucosylase/hydrolase 15                          | -3.4 | 3.3E-07 | 5.4E-06 | -3.0 | 2.1E-06 | 2.4E-04 |
| AT4G21730 | AT4G21730 | pseudogene of AAA-type ATPase family protein                          | -3.1 | 4.9E-06 | 5.5E-05 | -2.9 | 8.5E-06 | 6.2E-04 |
| AT2G19660 | AT2G19660 | Cysteine/Histidine-rich C1 domain family protein                      | -4.8 | 1.1E-11 | 7.0E-10 | -2.9 | 2.5E-08 | 1.3E-05 |
| AT1G29500 | AT1G29500 | SAUR-like auxin-responsive protein family                             | -1.1 | 5.5E-01 | 6.8E-01 | -2.9 | 1.3E-05 | 8.4E-04 |
| AT3G51895 | SULTR3    |                                                                       | 1.3  | 3.3E-01 | 4.8E-01 | -2.9 | 1.6E-03 | 2.2E-02 |
| AT5G46240 | KAT1      |                                                                       | -1.5 | 1.0E-02 | 3.3E-02 | -2.9 | 3.1E-08 | 1.4E-05 |
| AT3G25717 | RTFL16    | ROTUNDIFOLIA like 16                                                  | -1.8 | 7.4E-03 | 2.5E-02 | -2.9 | 1.2E-05 | 7.7E-04 |
| AT2G29120 | GLR2.7    | glutamate receptor 2.7                                                | -1.2 | 1.7E-01 | 3.0E-01 | -2.9 | 6.0E-07 | 9.7E-05 |
| AT3G16470 | JR1       | Mannose-binding lectin superfamily protein                            | 1.0  | 8.6E-01 | 9.2E-01 | -2.9 | 1.1E-07 | 2.9E-05 |
| AT1G02340 | HFR1      | basic helix-loop-helix (bHLH) DNA-binding superfamily protein         | 1.2  | 2.6E-01 | 4.1E-01 | -2.9 | 1.2E-06 | 1.6E-04 |
| AT1G29450 | AT1G29450 | SAUR-like auxin-responsive protein family                             | -1.3 | 2.3E-01 | 3.8E-01 | -2.8 | 1.9E-04 | 5.0E-03 |
| AT4G37980 | ELI3-1    | cinnamyl alcohol dehydrogenase 7                                      | 1.3  | 1.8E-01 | 3.1E-01 | -2.8 | 9.1E-06 | 6.5E-04 |
| AT5G66640 | DAR3      | DA1-related protein 3                                                 | -2.4 | 1.1E-02 | 3.5E-02 | -2.8 | 3.7E-03 | 3.8E-02 |
| AT1G03445 | BSU1      | Serine/threonine protein phosphatase family                           | 2.0  | 1.5E-03 | 7.0E-03 | -2.8 | 1.4E-04 | 4.1E-03 |
| AT1G43590 | AT1G43590 | transposable_element_gene                                             | -1.4 | 1.5E-01 | 2.7E-01 | -2.8 | 1.7E-04 | 4.6E-03 |
| AT4G14819 | AT4G14819 | hypothetical protein (DUF1677)                                        | -3.5 | 1.6E-04 | 1.1E-03 | -2.8 | 8.8E-04 | 1.5E-02 |
| AT5G67180 | TOE3      | target of early activation tagged (EAT) 3                             | -1.1 | 7.8E-01 | 8.6E-01 | -2.8 | 9.1E-04 | 1.5E-02 |
| AT1G73220 | OCT1      | organic cation/carnitine transporter1                                 | -5.7 | 5.5E-06 | 6.0E-05 | -2.8 | 1.1E-03 | 1.7E-02 |
| AT3G59900 | ARGOS     | auxin-regulated gene involved in organ size                           | 1.1  | 4.9E-01 | 6.3E-01 | -2.8 | 9.6E-06 | 6.7E-04 |
| AT3G55240 | AT3G55240 | Plant protein 1589 of unknown function                                | -1.8 | 1.6E-03 | 7.1E-03 | -2.8 | 1.6E-06 | 2.0E-04 |
| AT1G05700 | AT1G05700 | Leucine-rich repeat transmembrane protein kinase protein              | -1.8 | 4.5E-02 | 1.1E-01 | -2.8 | 1.3E-03 | 1.9E-02 |
| AT4G27460 | CBSX5     | Cystathionine beta-synthase (CBS) family protein                      | -6.4 | 4.9E-06 | 5.5E-05 | -2.8 | 2.3E-03 | 2.8E-02 |
| AT1G30280 | AT1G30280 | Chaperone DnaJ-domain superfamily protein                             | -1.3 | 7.5E-02 | 1.6E-01 | -2.7 | 3.5E-08 | 1.4E-05 |
| AT1G68360 | AT1G68360 | C2H2 and C2HC zinc fingers superfamily protein                        | -2.7 | 3.3E-05 | 2.8E-04 | -2.7 | 2.8E-05 | 1.3E-03 |
| AT4G21745 | AT4G21745 | PAK-box/P21-Rho-binding family protein                                | -2.7 | 2.1E-04 | 1.3E-03 | -2.7 | 2.0E-04 | 5.2E-03 |
| AT2G23170 | GH3.3     | Auxin-responsive GH3 family protein                                   | -6.6 | 2.0E-07 | 3.5E-06 | -2.7 | 4.5E-04 | 9.1E-03 |
| AT4G39700 | AT4G39700 | Heavy metal transport/detoxification superfamily protein              | -1.4 | 1.2E-01 | 2.2E-01 | -2.7 | 2.6E-04 | 6.3E-03 |
| AT3G15356 | AT3G15356 | Legume lectin family protein                                          | -1.2 | 1.4E-01 | 2.5E-01 | -2.7 | 1.2E-07 | 3.1E-05 |
| AT3G29370 | P1R3      | hypothetical protein                                                  | -3.3 | 5.7E-06 | 6.2E-05 | -2.7 | 5.5E-05 | 2.1E-03 |
| AT3G21330 | AT3G21330 | basic helix-loop-helix (bHLH) DNA-binding superfamily protein         | -3.1 | 5.1E-05 | 4.0E-04 | -2.7 | 2.1E-04 | 5.4E-03 |
| AT4G16892 | AT4G16892 |                                                                       | -1.5 | 2.9E-02 | 7.5E-02 | -2.7 | 2.7E-06 | 2.8E-04 |
| AT5G14780 | FDH       | formate dehydrogenase                                                 | -2.7 | 4.8E-08 | 1.0E-06 | -2.7 | 4.4E-08 | 1.6E-05 |
| AT1G72140 | AT1G72140 | Major facilitator superfamily protein                                 | -1.1 | 4.8E-01 | 6.2E-01 | -2.7 | 1.2E-05 | 7.8E-04 |
| AT4G16780 | HB-2      | homeobox protein 2                                                    | -3.2 | 8.7E-04 | 4.4E-03 | -2.7 | 3.6E-03 | 3.8E-02 |
| AT2G33205 | AT2G33205 | Serinc-domain containing serine and sphingolipid biosynthesis protein | -1.7 | 3.5E-02 | 8.8E-02 | -2.7 | 3.4E-04 | 7.5E-03 |
| AT1G76240 | AT1G76240 | DUF241 domain protein (DUF241)                                        | -1.3 | 1.7E-01 | 2.9E-01 | -2.6 | 1.6E-06 | 1.9E-04 |
| AT1G65310 | XTH17     | xyloglucan endotransglucosylase/hydrolase 17                          | -3.3 | 1.4E-05 | 1.3E-04 | -2.6 | 1.8E-04 | 4.9E-03 |
| AT3G29575 | AFP3      | ABI five binding protein 3                                            | -1.8 | 3.2E-03 | 1.3E-02 | -2.6 | 1.7E-05 | 9.9E-04 |
| AT2G47010 | AT2G47010 | calcium/calcium/calmodulin-dependent Serine/Threonine-kinase          | 1.3  | 6.1E-02 | 1.3E-01 | -2.6 | 2.8E-08 | 1.3E-05 |
| AT3G42658 | SADHU3-2  | transposable_element_gene                                             | -1.6 | 1.8E-02 | 5.2E-02 | -2.6 | 4.4E-05 | 1.8E-03 |
| AT1G52190 | AT1G52190 | Major facilitator superfamily protein                                 | -2.3 | 8.9E-09 | 2.4E-07 | -2.6 | 4.1E-10 | 6.8E-07 |
| AT4G13280 | TPS12     | terpenoid synthase 12                                                 | -1.0 | 9.7E-01 | 9.9E-01 | -2.6 | 8.3E-05 | 2.8E-03 |
| AT5G47370 | HAT2      | Homeobox-leucine zipper protein 4 (HB-4) / HD-ZIP protein             | -2.3 | 5.5E-05 | 4.3E-04 | -2.6 | 6.0E-06 | 4.9E-04 |
| AT2G05518 | AT2G05518 |                                                                       | -1.8 | 1.5E-02 | 4.6E-02 | -2.6 | 2.9E-04 | 6.7E-03 |
| AT1G29510 | SAUR68    | SAUR-like auxin-responsive protein family                             | -1.0 | 9.3E-01 | 9.6E-01 | -2.6 | 1.4E-05 | 8.5E-04 |
| AT3G23030 | IAA2      | indole-3-acetic acid inducible 2                                      | -1.2 | 1.4E-01 | 2.6E-01 | -2.5 | 3.4E-08 | 1.4E-05 |
| AT2G43050 | ATPMPCRCD | Plant invertase/pectin methylesterase inhibitor superfamily           | -2.9 | 1.9E-05 | 1.8E-04 | -2.5 | 9.1E-05 | 3.0E-03 |
| AT3G13980 | AT3G13980 | SKI/DACH domain protein                                               | -2.0 | 3.5E-04 | 2.0E-03 | -2.5 | 4.8E-06 | 4.2E-04 |
| AT5G57240 | ORP4C     | OSBP(oxysterol binding protein)-related protein 4C                    | -5.0 | 3.0E-09 | 9.5E-08 | -2.5 | 2.8E-05 | 1.3E-03 |
| AT2G32990 | GH9B8     | glycosyl hydrolase 9B8                                                | 1.8  | 2.9E-03 | 1.2E-02 | -2.5 | 3.3E-05 | 1.5E-03 |
| AT4G28720 | YUC8      | Flavin-binding monooxygenase family protein                           | -2.5 | 3.6E-04 | 2.1E-03 | -2.5 | 3.6E-04 | 7.8E-03 |
| AT5G01740 | AT5G01740 | Nuclear transport factor 2 (NTF2) family protein                      | 1.0  | 9.0E-01 | 9.4E-01 | -2.5 | 4.3E-05 | 1.8E-03 |
| AT5G51810 | GA20OX2   | gibberellin 20 oxidase 2                                              | -2.0 | 1.8E-03 | 7.9E-03 | -2.5 | 1.2E-04 | 3.7E-03 |
| AT5G59010 | BSK5      | kinase with tetratricopeptide repeat domain-containing protein        | -2.0 | 3.5E-07 | 5.7E-06 | -2.5 | 2.4E-09 | 2.0E-06 |
| AT3G20470 | GRP5      | glycine-rich protein 5                                                | -2.2 | 1.5E-03 | 6.9E-03 | -2.5 | 2.7E-04 | 6.4E-03 |
| AT5G39865 | AT5G39865 | Glutaredoxin family protein                                           | -2.4 | 4.4E-07 | 7.0E-06 | -2.5 | 2.6E-07 | 5.1E-05 |
| AT4G14640 | CAM8      | calmodulin 8                                                          | -2.0 | 8.9E-04 | 4.4E-03 | -2.5 | 3.2E-05 | 1.5E-03 |
| AT1G27670 | AT1G27670 | transmembrane protein                                                 | -1.8 | 1.3E-03 | 6.1E-03 | -2.5 | 7.8E-06 | 5.9E-04 |
| AT1G06080 | ADS1      | delta 9 desaturase 1                                                  | -4.6 | 5.9E-06 | 6.4E-05 | -2.5 | 1.7E-03 | 2.2E-02 |
| AT5G66390 | AT5G66390 | Peroxidase superfamily protein                                        | 1.2  | 2.1E-01 | 3.5E-01 | -2.5 | 4.5E-08 | 1.6E-05 |
| AT1G11120 | AT1G11120 | CTTNBP 2 amino-terminal-like protein                                  | -3.4 | 1.2E-07 | 2.3E-06 | -2.5 | 1.1E-05 | 7.5E-04 |
| AT5G27660 | DEG14     | Trypsin family protein with PDZ domain-containing protein             | 1.1  | 5.2E-01 | 6.6E-01 | -2.5 | 5.7E-06 | 4.7E-04 |
| AT5G44260 | AT5G44260 | Zinc finger C-x8-C-x5-C-x3-H type family protein                      | -2.2 | 5.0E-04 | 2.8E-03 | -2.5 | 9.3E-05 | 3.1E-03 |
| AT1G62770 | AT1G62770 | Plant invertase/pectin methylesterase inhibitor superfamily protein   | -5.1 | 1.9E-12 | 1.6E-10 | -2.5 | 2.8E-07 | 5.4E-05 |
| AT3G49820 | AT3G49820 | hypothetical protein                                                  | -1.4 | 1.5E-01 | 2.7E-01 | -2.5 | 1.6E-03 | 2.1E-02 |
| AT1G29440 | SAUR63    | SAUR-like auxin-responsive protein family                             | 1.2  | 3.0E-01 | 4.5E-01 | -2.5 | 7.3E-05 | 2.6E-03 |
| AT5G62280 | AT5G62280 | DUF1442 family protein (DUF1442)                                      | -2.3 | 2.0E-04 | 1.2E-03 | -2.5 | 7.3E-05 | 2.6E-03 |
| AT5G64770 | RGF9      | root meristem growth factor                                           | 1.9  | 6.1E-05 | 4.7E-04 | -2.4 | 6.7E-07 | 1.0E-04 |
| AT1G10560 | PUB18     | plant U-box 18                                                        | -3.1 | 1.7E-04 | 1.1E-03 | -2.4 | 1.6E-03 | 2.2E-02 |
| AT2G38530 | LTP2      | lipid transfer protein 2                                              | -1.5 | 1.3E-01 | 2.5E-01 | -2.4 | 3.0E-03 | 3.4E-02 |

|           |           |                                                                                                   |      |         |         |      |         |         |
|-----------|-----------|---------------------------------------------------------------------------------------------------|------|---------|---------|------|---------|---------|
| AT5G01790 | AT5G01790 | hypothetical protein                                                                              | 1.8  | 1.6E-04 | 1.0E-03 | -2.4 | 5.6E-07 | 9.1E-05 |
| AT5G55780 | AT5G55780 | Cysteine/Histidine-rich C1 domain family protein                                                  | -3.6 | 1.5E-05 | 1.4E-04 | -2.4 | 5.7E-04 | 1.1E-02 |
| AT5G57760 | AT5G57760 | hypothetical protein                                                                              | -1.6 | 9.8E-03 | 3.2E-02 | -2.4 | 3.3E-05 | 1.5E-03 |
| AT1G31040 | AT1G31040 | PLATZ transcription factor family protein                                                         | -2.2 | 6.2E-04 | 3.3E-03 | -2.4 | 1.5E-04 | 4.3E-03 |
| AT4G14140 | DMT2      | DNA methyltransferase 2                                                                           | -2.0 | 1.7E-02 | 5.0E-02 | -2.4 | 3.0E-03 | 3.3E-02 |
| AT2G42990 | AT2G42990 | GDSL-like Lipase/Acylhydrolase superfamily protein                                                | -5.1 | 2.0E-08 | 4.8E-07 | -2.4 | 9.3E-05 | 3.1E-03 |
| AT2G40610 | EXPA8     | expansin A8                                                                                       | -1.9 | 5.5E-04 | 3.0E-03 | -2.4 | 6.5E-06 | 5.2E-04 |
| AT5G53830 | AT5G53830 | VQ motif-containing protein                                                                       | -2.0 | 8.0E-06 | 8.3E-05 | -2.4 | 1.7E-07 | 3.8E-05 |
| AT3G50800 | AT3G50800 | hypothetical protein                                                                              | -2.2 | 3.2E-03 | 1.3E-02 | -2.4 | 1.4E-03 | 2.0E-02 |
| AT1G20450 | ERD10     | Dehydrin family protein                                                                           | 1.5  | 3.0E-03 | 1.2E-02 | -2.4 | 1.8E-08 | 1.0E-05 |
| AT5G23350 | AT5G23350 | GRAM domain protein/ABA-responsive-like protein                                                   | -1.3 | 5.6E-02 | 1.3E-01 | -2.4 | 3.0E-07 | 5.6E-05 |
| AT4G12730 | FLA2      | FASCICLIN-like arabinogalactan 2                                                                  | -1.4 | 1.4E-02 | 4.1E-02 | -2.4 | 5.0E-08 | 1.8E-05 |
| AT4G37580 | HLS1      | Acyl-CoA N-acyltransferases (NAT) superfamily protein                                             | -2.4 | 3.6E-04 | 2.1E-03 | -2.4 | 3.5E-04 | 7.6E-03 |
| AT5G46590 | NAC096    | NAC domain containing protein 96                                                                  | 1.1  | 7.3E-01 | 8.3E-01 | -2.4 | 2.3E-04 | 5.8E-03 |
| AT4G08040 | ACS11     | 1-aminocyclopropane-1-carboxylate synthase 11                                                     | -1.9 | 8.4E-03 | 2.8E-02 | -2.4 | 7.3E-04 | 1.3E-02 |
| AT5G66580 | AT5G66580 | hypothetical protein                                                                              | -1.4 | 7.3E-02 | 1.6E-01 | -2.4 | 8.6E-05 | 2.9E-03 |
| AT4G27260 | WES1      | Auxin-responsive GH3 family protein                                                               | -2.2 | 3.1E-06 | 3.8E-05 | -2.4 | 6.2E-07 | 9.8E-05 |
| AT5G10970 | AT5G10970 | C2H2 and C2HC zinc fingers superfamily protein                                                    | -1.5 | 4.1E-02 | 9.9E-02 | -2.4 | 1.4E-04 | 4.1E-03 |
| AT4G12470 | AZ11      | azelaic acid induced 1                                                                            | 1.2  | 2.9E-01 | 4.4E-01 | -2.4 | 2.4E-04 | 6.0E-03 |
| AT2G47015 | MIR408    |                                                                                                   | -2.0 | 1.8E-03 | 8.0E-03 | -2.4 | 3.0E-04 | 7.0E-03 |
| AT3G24715 | AT3G24715 | kinase superfamily with octicosapeptide/Phox/Bem1p domain-containing protein                      | -2.4 | 2.3E-10 | 1.1E-08 | -2.3 | 3.0E-10 | 6.5E-07 |
| AT1G15050 | IAA34     | indole-3-acetic acid inducible 34                                                                 | -1.5 | 1.5E-01 | 2.7E-01 | -2.3 | 2.6E-03 | 3.0E-02 |
| AT2G25625 | AT2G25625 | histone deacetylase-like protein                                                                  | 1.5  | 1.4E-02 | 4.3E-02 | -2.3 | 1.5E-05 | 9.2E-04 |
| AT5G65390 | AGP7      | arabinogalactan protein 7                                                                         | -3.3 | 6.4E-09 | 1.8E-07 | -2.3 | 3.2E-06 | 3.1E-04 |
| AT5G38005 | AT5G38005 |                                                                                                   | -1.2 | 3.4E-01 | 4.9E-01 | -2.3 | 6.3E-04 | 1.2E-02 |
| AT5G51200 | EMB3142   | nuclear pore complex protein (DUF3414)                                                            | -1.8 | 1.3E-03 | 6.1E-03 | -2.3 | 2.7E-05 | 1.3E-03 |
| AT5G66590 | AT5G66590 | CAP (Cysteine-rich secretory proteins, Antigen 5, and Pathogenesis-related 1 protein) superfamily | -1.9 | 1.7E-03 | 7.5E-03 | -2.3 | 1.2E-04 | 3.7E-03 |
| AT4G14380 | AT4G14380 | cotton fiber protein                                                                              | -1.6 | 1.0E-02 | 3.3E-02 | -2.3 | 3.5E-05 | 1.6E-03 |
| AT5G39610 | NAC6      | NAC domain containing protein 6                                                                   | -1.1 | 6.4E-01 | 7.6E-01 | -2.3 | 2.2E-05 | 1.2E-03 |
| AT2G18969 | AT2G18969 | transcription factor/transcription regulator                                                      | -1.5 | 1.9E-02 | 5.5E-02 | -2.3 | 2.1E-05 | 1.1E-03 |
| AT3G55230 | AT3G55230 | Disease resistance-responsive (dirigent-like protein) family protein                              | -1.1 | 5.5E-01 | 6.9E-01 | -2.3 | 3.7E-06 | 3.4E-04 |
| AT2G43060 | IBH1      | ILI1 binding bHLH 1                                                                               | -1.4 | 5.3E-02 | 1.2E-01 | -2.3 | 2.0E-05 | 1.1E-03 |
| AT1G60030 | NAT7      | nucleobase-ascorbate transporter 7                                                                | -1.2 | 2.5E-01 | 4.0E-01 | -2.3 | 1.1E-05 | 7.5E-04 |
| AT5G02760 | AT5G02760 | Protein phosphatase 2C family protein                                                             | -2.7 | 1.5E-05 | 1.4E-04 | -2.3 | 1.6E-04 | 4.4E-03 |
| AT1G78815 | LSH7      | LIGHT-DEPENDENT SHORT HYPOCOTYLS-like protein (DUF640)                                            | -1.7 | 6.2E-02 | 1.4E-01 | -2.3 | 5.0E-03 | 4.7E-02 |
| AT3G18200 | UMAMIT4   | nodulin MtN21 /EamA-like transporter family                                                       | -2.7 | 1.1E-08 | 3.0E-07 | -2.3 | 2.6E-07 | 5.1E-05 |
| AT4G11280 | ACS6      | 1-aminocyclopropane-1-carboxylic acid (acc) synthase 6                                            | -2.4 | 5.6E-04 | 3.0E-03 | -2.3 | 9.0E-04 | 1.5E-02 |
| AT5G51790 | AT5G51790 | basic helix-loop-helix (bHLH) DNA-binding superfamily protein                                     | -2.8 | 2.0E-07 | 3.4E-06 | -2.3 | 6.4E-06 | 5.1E-04 |
| AT2G39450 | MTP11     | Cation efflux family protein                                                                      | 1.3  | 2.5E-01 | 3.9E-01 | -2.3 | 3.2E-04 | 7.2E-03 |
| AT1G08500 | ENODL18   | early nodulin-like protein 18                                                                     | -4.3 | 1.9E-13 | 2.2E-11 | -2.3 | 4.1E-08 | 1.6E-05 |
| AT2G27370 | CASP3     | Uncharacterized protein family (UPF0497)                                                          | -1.1 | 5.0E-01 | 6.4E-01 | -2.3 | 2.6E-07 | 5.1E-05 |
| AT1G61260 | AT1G61260 | cotton fiber (DUF761)                                                                             | -2.0 | 3.8E-08 | 8.2E-07 | -2.3 | 1.4E-09 | 1.7E-06 |
| AT5G38020 | AT5G38020 | S-adenosyl-L-methionine-dependent methyltransferases superfamily protein                          | -1.1 | 7.0E-01 | 8.1E-01 | -2.3 | 2.0E-03 | 2.5E-02 |
| AT3G26170 | CYP71B19  | cytochrome P450, family 71, subfamily B, polypeptide 19                                           | -2.9 | 6.4E-05 | 4.9E-04 | -2.3 | 1.1E-03 | 1.7E-02 |
| AT5G38970 | BR6OX1    | brassinosteroid-6-oxidase 1                                                                       | -3.0 | 6.6E-11 | 3.4E-09 | -2.2 | 3.0E-08 | 1.4E-05 |
| AT1G09480 | AT1G09480 | NAD(P)-binding Rossmann-fold superfamily protein                                                  | -1.2 | 3.2E-01 | 4.7E-01 | -2.2 | 1.2E-04 | 3.7E-03 |
| AT1G75500 | WAT1      | Walls Are Thin 1                                                                                  | -1.7 | 1.6E-06 | 2.1E-05 | -2.2 | 3.5E-10 | 6.8E-07 |
| AT5G65980 | AT5G65980 | Auxin efflux carrier family protein                                                               | -1.1 | 7.3E-01 | 8.3E-01 | -2.2 | 3.4E-03 | 3.6E-02 |
| AT1G02670 | AT1G02670 | P-loop containing nucleoside triphosphate hydrolases superfamily protein                          | -1.6 | 4.8E-03 | 1.8E-02 | -2.2 | 1.6E-05 | 9.2E-04 |
| AT3G55840 | AT3G55840 | Hs1pro-1 protein                                                                                  | -2.5 | 2.1E-05 | 1.8E-04 | -2.2 | 1.3E-04 | 3.9E-03 |
| AT5G55730 | FLA1      | FASCICLIN-like arabinogalactan 1                                                                  | -2.0 | 6.2E-07 | 9.3E-06 | -2.2 | 2.8E-08 | 1.3E-05 |
| AT1G17400 | AT1G17400 | hypothetical protein                                                                              | 1.3  | 2.6E-01 | 4.1E-01 | -2.2 | 1.3E-03 | 1.9E-02 |
| AT3G11550 | CASP2     | Uncharacterized protein family (UPF0497)                                                          | -1.1 | 3.6E-01 | 5.1E-01 | -2.2 | 1.1E-07 | 3.0E-05 |
| AT3G03240 | AT3G03240 | alpha/beta-Hydrolases superfamily protein                                                         | -1.7 | 4.3E-02 | 1.0E-01 | -2.2 | 3.7E-03 | 3.8E-02 |
| AT1G01120 | KCS1      | 3-ketoacyl-CoA synthase 1                                                                         | 1.0  | 9.2E-01 | 9.5E-01 | -2.2 | 6.2E-07 | 9.8E-05 |
| AT5G47220 | ERF2      | ethylene responsive element binding factor 2                                                      | -1.8 | 3.3E-02 | 8.4E-02 | -2.2 | 4.2E-03 | 4.2E-02 |
| AT2G43290 | MSS3      | Calcium-binding EF-hand family protein                                                            | -1.7 | 1.3E-04 | 9.1E-04 | -2.2 | 2.2E-07 | 4.6E-05 |
| AT3G08660 | AT3G08660 | Phototropic-responsive NPH3 family protein                                                        | -1.1 | 6.4E-01 | 7.6E-01 | -2.2 | 2.9E-06 | 2.9E-04 |
| AT1G69570 | AT1G69570 | Dof-type zinc finger DNA-binding family protein                                                   | -1.6 | 4.1E-02 | 1.0E-01 | -2.2 | 1.9E-03 | 2.5E-02 |
| AT5G67090 | AT5G67090 | Subtilisin-like serine endopeptidase family protein                                               | -1.2 | 2.8E-01 | 4.3E-01 | -2.2 | 2.0E-06 | 2.3E-04 |
| AT1G09310 | AT1G09310 | plant/protein (Protein of unknown function,                                                       | 1.2  | 3.8E-01 | 5.3E-01 | -2.2 | 5.0E-05 | 2.0E-03 |
| AT1G05835 | AT1G05835 | PHD finger protein                                                                                | -1.7 | 1.2E-02 | 3.8E-02 | -2.2 | 4.4E-04 | 9.1E-03 |
| AT1G36940 | AT1G36940 | myotubularin-like protein                                                                         | -1.7 | 4.9E-04 | 2.7E-03 | -2.2 | 4.5E-06 | 4.0E-04 |
| AT1G62610 | AT1G62610 | NAD(P)-binding Rossmann-fold superfamily protein                                                  | -2.5 | 4.1E-08 | 8.8E-07 | -2.2 | 4.9E-07 | 8.2E-05 |
| AT1G01200 | RABA3     | RAB GTPase homolog A3                                                                             | -1.6 | 6.0E-03 | 2.2E-02 | -2.2 | 4.3E-05 | 1.8E-03 |
| AT1G12070 | AT1G12070 | Immunoglobulin E-set superfamily protein                                                          | 1.3  | 1.3E-01 | 2.4E-01 | -2.2 | 2.4E-05 | 1.2E-03 |
| AT5G04310 | AT5G04310 | Pectin lyase-like superfamily protein                                                             | -1.8 | 5.0E-06 | 5.6E-05 | -2.2 | 2.2E-08 | 1.2E-05 |
| AT5G20740 | AT5G20740 | Plant invertase/pectin methylesterase inhibitor superfamily protein                               | -1.6 | 9.2E-03 | 3.0E-02 | -2.2 | 1.2E-04 | 3.6E-03 |
| AT3G23450 | AT3G23450 | transmembrane protein                                                                             | -1.6 | 3.4E-03 | 1.4E-02 | -2.2 | 5.2E-06 | 4.5E-04 |
| AT5G65800 | ACS5      | ACC synthase 5                                                                                    | -8.5 | 2.9E-08 | 6.6E-07 | -2.2 | 4.2E-03 | 4.2E-02 |
| AT5G01760 | AT5G01760 | ENTH/VHS/GAT family protein                                                                       | 1.1  | 6.6E-01 | 7.7E-01 | -2.2 | 6.8E-04 | 1.2E-02 |

|           |                  |                                                                          |      |         |         |      |         |         |
|-----------|------------------|--------------------------------------------------------------------------|------|---------|---------|------|---------|---------|
| AT1G71740 | <i>AT1G71740</i> | nucleolar protein                                                        | 1.1  | 3.2E-01 | 4.7E-01 | -2.2 | 2.8E-06 | 2.9E-04 |
| AT4G13580 | <i>AT4G13580</i> | Disease resistance-responsive (dirigent-like protein) family protein     | -1.1 | 7.0E-01 | 8.1E-01 | -2.1 | 7.8E-05 | 2.8E-03 |
| AT2G28670 | <i>ESB1</i>      | Disease resistance-responsive (dirigent-like protein) family protein     | -1.1 | 3.0E-01 | 4.5E-01 | -2.1 | 1.2E-06 | 1.5E-04 |
| AT1G29430 | <i>AT1G29430</i> | SAUR-like auxin-responsive protein family                                | 1.5  | 7.1E-03 | 2.5E-02 | -2.1 | 3.0E-05 | 1.4E-03 |
| AT4G13290 | <i>CYP71A19</i>  | cytochrome P450, family 71, subfamily A, polypeptide 19                  | 1.2  | 1.1E-01 | 2.2E-01 | -2.1 | 7.0E-06 | 5.4E-04 |
| AT3G03820 | <i>SAUR29</i>    | SAUR-like auxin-responsive protein family                                | -1.4 | 8.0E-02 | 1.7E-01 | -2.1 | 9.3E-04 | 1.5E-02 |
| AT5G02200 | <i>FHL</i>       | far-red-elongated hypocotyl1-like protein                                | -2.6 | 4.1E-05 | 3.3E-04 | -2.1 | 5.4E-04 | 1.0E-02 |
| AT2G17880 | <i>AT2G17880</i> | Chaperone DnaJ-domain superfamily protein                                | 1.0  | 8.1E-01 | 8.9E-01 | -2.1 | 1.9E-06 | 2.2E-04 |
| AT1G62480 | <i>AT1G62480</i> | Vacuolar calcium-binding protein-like protein                            | -2.2 | 6.9E-07 | 1.0E-05 | -2.1 | 2.1E-06 | 2.4E-04 |
| AT5G04190 | <i>PKS4</i>      | phytochrome kinase substrate 4                                           | -2.3 | 2.3E-05 | 2.0E-04 | -2.1 | 7.3E-05 | 2.6E-03 |
| AT4G18290 | <i>KAT2</i>      | potassium channel KAT1-like protein                                      | -1.2 | 1.2E-01 | 2.4E-01 | -2.1 | 9.2E-06 | 6.5E-04 |
| AT3G08570 | <i>AT3G08570</i> | Phototropic-responsive NPH3 family protein                               | -1.7 | 1.5E-03 | 6.8E-03 | -2.1 | 4.0E-05 | 1.7E-03 |
| AT4G28900 | <i>AT4G28900</i> | transposable_element_gene                                                | -1.9 | 1.6E-04 | 1.0E-03 | -2.1 | 2.5E-05 | 1.2E-03 |
| AT5G49630 | <i>AAP6</i>      | amino acid permease 6                                                    | -1.7 | 1.5E-03 | 6.8E-03 | -2.1 | 2.8E-05 | 1.3E-03 |
| AT4G23670 | <i>AT4G23670</i> | Polyketide cyclase/dehydrase and lipid transport superfamily protein     | 1.1  | 6.2E-01 | 7.5E-01 | -2.1 | 2.1E-05 | 1.1E-03 |
| AT5G02190 | <i>PCS1</i>      | Eukaryotic aspartyl protease family protein                              | -1.9 | 8.0E-03 | 2.7E-02 | -2.1 | 3.4E-03 | 3.6E-02 |
| AT1G54200 | <i>AT1G54200</i> | DNA mismatch repair Msh6-like protein                                    | -1.6 | 2.0E-04 | 1.2E-03 | -2.1 | 7.4E-08 | 2.4E-05 |
| AT1G61255 | <i>AT1G61255</i> | hypothetical protein                                                     | -1.4 | 1.4E-01 | 2.6E-01 | -2.1 | 1.8E-03 | 2.4E-02 |
| AT2G37030 | <i>AT2G37030</i> | SAUR-like auxin-responsive protein family                                | 1.7  | 2.7E-02 | 7.1E-02 | -2.1 | 5.2E-03 | 4.8E-02 |
| AT4G37410 | <i>CYP81F4</i>   | cytochrome P450, family 81, subfamily F, polypeptide 4                   | 1.1  | 7.0E-01 | 8.1E-01 | -2.1 | 3.1E-05 | 1.5E-03 |
| AT1G01130 | <i>AT1G01130</i> | CBL-interacting Serine/Threonine-kinase                                  | -1.3 | 2.6E-01 | 4.1E-01 | -2.1 | 1.9E-03 | 2.5E-02 |
| AT5G43660 | <i>AT5G43660</i> | 2-oxoglutarate (2OG) and Fe(II)-dependent oxygenase superfamily protein  | -1.2 | 3.4E-01 | 4.9E-01 | -2.1 | 3.8E-04 | 8.1E-03 |
| AT1G27030 | <i>AT1G27030</i> | hypothetical protein                                                     | -1.5 | 4.3E-03 | 1.6E-02 | -2.1 | 3.1E-06 | 3.0E-04 |
| AT5G64870 | <i>AT5G64870</i> | SPFH/Band 7/PHB domain-containing membrane-associated protein family     | -2.0 | 1.3E-03 | 6.1E-03 | -2.1 | 6.2E-04 | 1.2E-02 |
| AT1G69840 | <i>AT1G69840</i> | SPFH/Band 7/PHB domain-containing membrane-associated protein family     | -1.7 | 2.4E-04 | 1.5E-03 | -2.1 | 2.2E-06 | 2.5E-04 |
| AT1G78490 | <i>CYP708A3</i>  | cytochrome P450, family 708, subfamily A, polypeptide 3                  | -1.7 | 4.6E-04 | 2.5E-03 | -2.1 | 3.9E-06 | 3.6E-04 |
| AT5G63810 | <i>BGAL10</i>    | beta-galactosidase 10                                                    | -2.3 | 5.1E-09 | 1.5E-07 | -2.1 | 9.5E-08 | 2.7E-05 |
| AT1G53700 | <i>WAG1</i>      | WAG 1                                                                    | -3.7 | 4.4E-07 | 6.9E-06 | -2.1 | 8.0E-04 | 1.4E-02 |
| AT4G24265 | <i>AT4G24265</i> | homeobox protein                                                         | -2.0 | 2.9E-04 | 1.7E-03 | -2.1 | 2.3E-04 | 5.8E-03 |
| AT1G66350 | <i>RGL1</i>      | RGA-like 1                                                               | -2.4 | 5.2E-08 | 1.1E-06 | -2.1 | 1.4E-06 | 1.7E-04 |
| AT4G38770 | <i>PRP4</i>      | proline-rich protein 4                                                   | -1.1 | 4.2E-01 | 5.7E-01 | -2.1 | 1.2E-04 | 3.5E-03 |
| AT4G20820 | <i>AT4G20820</i> | FAD-binding Berberine family protein                                     | 1.5  | 1.0E-02 | 3.3E-02 | -2.1 | 3.3E-05 | 1.5E-03 |
| AT2G21100 | <i>AT2G21100</i> | Disease resistance-responsive (dirigent-like protein) family protein     | 1.6  | 9.7E-03 | 3.2E-02 | -2.1 | 2.8E-04 | 6.6E-03 |
| AT1G11545 | <i>XTH8</i>      | xyloglucan endotransglucosylase/hydrolase 8                              | -3.2 | 1.0E-12 | 8.9E-11 | -2.1 | 3.9E-08 | 1.5E-05 |
| AT1G77400 | <i>AT1G77400</i> | extensin-like protein                                                    | 1.1  | 6.5E-01 | 7.7E-01 | -2.1 | 3.5E-04 | 7.7E-03 |
| AT4G32350 | <i>AT4G32350</i> | Regulator of Vps4 activity in the MVB pathway protein                    | -1.3 | 5.8E-03 | 2.1E-02 | -2.0 | 1.0E-10 | 3.1E-07 |
| AT4G22690 | <i>CYP706A1</i>  | cytochrome P450, family 706, subfamily A, polypeptide 1                  | -1.1 | 7.1E-01 | 8.2E-01 | -2.0 | 2.5E-04 | 6.1E-03 |
| AT1G69490 | <i>NAP</i>       | NAC-like, activated by AP3/PI                                            | -1.1 | 7.9E-01 | 8.7E-01 | -2.0 | 2.7E-03 | 3.1E-02 |
| AT5G63450 | <i>CYP94B1</i>   | cytochrome P450, family 94, subfamily B, polypeptide 1                   | 1.3  | 6.2E-02 | 1.4E-01 | -2.0 | 4.9E-05 | 2.0E-03 |
| AT5G44670 | <i>GALS2</i>     | glycosyltransferase family protein (DUF23)                               | -1.7 | 1.3E-05 | 1.2E-04 | -2.0 | 2.7E-08 | 1.3E-05 |
| AT1G30750 | <i>AT1G30750</i> | TPRXL                                                                    | 1.0  | 9.1E-01 | 9.5E-01 | -2.0 | 9.9E-05 | 3.2E-03 |
| AT5G15290 | <i>CASP5</i>     | Uncharacterized protein family (UPF0497)                                 | -1.4 | 5.8E-02 | 1.3E-01 | -2.0 | 2.5E-04 | 6.1E-03 |
| AT1G04240 | <i>SHY2</i>      | AUX/IAA transcriptional regulator family protein                         | -1.9 | 2.8E-04 | 1.7E-03 | -2.0 | 8.5E-05 | 2.9E-03 |
| AT5G15900 | <i>TBL19</i>     | TRICHOME BIREFRINGENCE-LIKE 19                                           | 2.0  | 3.3E-04 | 1.9E-03 | -2.0 | 6.2E-04 | 1.2E-02 |
| AT1G64390 | <i>GH9C2</i>     | glycosyl hydrolase 9C2                                                   | -1.3 | 7.8E-02 | 1.6E-01 | -2.0 | 3.2E-06 | 3.1E-04 |
| AT3G04360 | <i>AT3G04360</i> | Calcium-dependent lipid-binding (CaLB domain) family protein             | -2.0 | 4.4E-03 | 1.7E-02 | -2.0 | 2.7E-03 | 3.1E-02 |
| AT4G39800 | <i>MIPS1</i>     | myo-inositol-1-phosphate synthase 1                                      | -1.4 | 2.6E-02 | 6.9E-02 | -2.0 | 6.8E-06 | 5.4E-04 |
| AT1G52290 | <i>PERK15</i>    | Protein kinase superfamily protein                                       | 1.6  | 1.0E-05 | 1.0E-04 | -2.0 | 4.3E-08 | 1.6E-05 |
| AT3G50570 | <i>AT3G50570</i> | hydroxyproline-rich glycoprotein family protein                          | 1.4  | 3.9E-02 | 9.6E-02 | -2.0 | 1.3E-04 | 3.9E-03 |
| AT2G06850 | <i>XTH4</i>      | xyloglucan endotransglucosylase/hydrolase 4                              | -1.6 | 1.8E-03 | 8.1E-03 | -2.0 | 3.6E-05 | 1.6E-03 |
| AT4G09890 | <i>AT4G09890</i> | mediator of RNA polymerase II transcription subunit, putative (DUF3511)  | -1.6 | 1.3E-03 | 6.1E-03 | -2.0 | 4.7E-06 | 4.2E-04 |
| AT3G50890 | <i>HB28</i>      | homeobox protein 28                                                      | -2.1 | 7.0E-04 | 3.6E-03 | -2.0 | 8.4E-04 | 1.4E-02 |
| AT2G12462 | <i>AT2G12462</i> | sterile alpha motif (SAM) domain protein                                 | -1.3 | 1.6E-02 | 4.8E-02 | -2.0 | 1.0E-07 | 2.8E-05 |
| AT2G34490 | <i>CYP710A2</i>  | cytochrome P450, family 710, subfamily A, polypeptide 2                  | -1.2 | 4.4E-01 | 5.9E-01 | -2.0 | 6.3E-04 | 1.2E-02 |
| AT1G33170 | <i>AT1G33170</i> | S-adenosyl-L-methionine-dependent methyltransferases superfamily protein | 1.4  | 5.6E-02 | 1.3E-01 | -2.0 | 1.2E-03 | 1.7E-02 |
| AT1G64660 | <i>MGL</i>       | methionine gamma-lyase                                                   | -1.9 | 9.5E-04 | 4.7E-03 | -2.0 | 3.1E-04 | 7.1E-03 |
| AT2G43535 | <i>AT2G43535</i> | Scorpion toxin-like knottin superfamily protein                          | -2.0 | 1.6E-03 | 7.1E-03 | -2.0 | 1.5E-03 | 2.1E-02 |
| AT1G72230 | <i>AT1G72230</i> | Cupredoxin superfamily protein                                           | -1.3 | 4.6E-02 | 1.1E-01 | -2.0 | 4.9E-07 | 8.2E-05 |
| AT5G44210 | <i>ERF9</i>      | erf domain protein 9                                                     | -2.0 | 1.3E-04 | 8.6E-04 | -2.0 | 1.2E-04 | 3.5E-03 |
| AT4G34710 | <i>ADC2</i>      | arginine decarboxylase 2                                                 | -1.3 | 9.0E-02 | 1.8E-01 | -2.0 | 2.2E-05 | 1.1E-03 |
| AT5G04370 | <i>NAMT1</i>     | S-adenosyl-L-methionine-dependent methyltransferases superfamily protein | -1.5 | 2.7E-02 | 7.1E-02 | -2.0 | 3.8E-04 | 8.1E-03 |
