# Supplementary material for: Degradation of the transcription factors PIF4 and PIF5 under UV‐B promotes UVR8‐mediated inhibition of hypocotyl growth in Arabidopsis
Source: PubMed Central journal article supplement — Plant J. 2019 Nov 7;101(3):507–17. doi: 10.1111/tpj.14556 (PMC7027837; doi:10.1111/tpj.14556), 2019-11-07
Supplement: TPJ-101-507-s005.pdf [file TPJ-101-507-s005.pdf]

**Table S4.** Oligonucleotide sequences used in this study.

|                      | AGI       | fw primer                    | rv primer                  | ref.                     |
|----------------------|-----------|------------------------------|----------------------------|--------------------------|
| <b>qRT-PCR:</b>      |           |                              |                            |                          |
| <i>XTR7</i>          | AT4G14130 | GATGCGTAAGCTACAGCAACTCGT     | AGAACCGAAACCTTGTCCGTCTTG   | Hornitschek et al., 2009 |
| <i>YUC8</i>          | AT4G28720 | GGCGGCTTGTCTCCATGAAC         | GATGAACTGACGCTTCGTCTG      | Hornitschek et al., 2012 |
| <i>IAA29</i>         | AT4G32280 | AAACAGCGTTTGTTCCTTGAATG      | TGGCCATCCAACAACCTTCGCTAT   | Sun et al., 2013         |
| <i>IAA19</i>         | AT3G15540 | GGTGACAACCTGCGAATACGTTACCA   | CCCGGTAGCATCCGATCTTTTCA    | Sun et al., 2013         |
| <i>RUP2</i>          | AT5G23730 | TTGTGGATCGGAAAACAACA         | CACTGGTCCACACCTGATTG       | this work                |
| <i>HY5</i>           | AT5G11260 | CCATCAAGCAGCGAGAGGTCATCAA    | CGCCGATCCAGATTCTCTACCGGAA  | Moriconi et al., 2018    |
| <i>PIF4</i>          | AT2G43010 | CCAGATCATCTCCGACCGGTTTG      | CTAGTGGTCCAAACGAGAACCGT    | this work                |
| <i>PIF5</i>          | AT3G59060 | GGGTACAATCATCTCCATACAT       | CCATGTACCTAGCGAGCTGCTCC    | this work                |
| <i>PP2A</i>          | AT1G10430 | TATCGGATGACGATTCCTTCGTGCAG   | GCTTGGTTCGACTATCGGAATGAGAG | this work                |
| <b>ChIP-qPCR:</b>    |           |                              |                            |                          |
| <i>ProXTR7_-1972</i> | AT4G14130 | CGCATGCCGGCTGGAATAGATAG      | CGACGTGTCACTTCCCTCGTACC    | Hornitschek et al., 2009 |
| <i>ProIAA19_-335</i> | AT4G28720 | ATCTGTTCCCTTAACCACCTTGT      | AAACCAATCCAATATCGACACG     | Jing et al., 2013        |
| <i>ProCHS_-213</i>   | AT5G13930 | AAGCAAGAAGAACCACAGAAAAGG     | GTTAGATGGACGGGCAGATGA      | Stracke et al., 2010     |
| <i>ProYUC8_-555</i>  | AT4G28720 | TCTCGTTGGTCCCACAAAG          | GGTTAGAGAAGGGAAGTGATG      | Hornitschek et al., 2012 |
| intergenic           | AT4G26900 | TCTTATAGTTGATTCCTTTTGTGACAGT | GCTGAGAAAGTGAACATACGTTGCT  | Stracke et al., 2010     |
